# Supplementary material for: Ion-chromatogram libraries assembly in DIA proteomic analysis of post-exercise skeletal muscle in prediabetic subjects
Source: Research Square preprint supplement (doi:10.21203/rs.3.rs-6331082/v1), 2025-04-23
Supplement: Supplementary file 1 [file 436e75da2d744f73aaeea9c2.pdf]

**Title:** Ion-chromatogram libraries assembly in DIA proteomic analysis of post-exercise skeletal muscle in prediabetic subjects.

This article contains the following supplemental data:

**Supplement\_1.pdf**

Table S1. Post-exercise characteristics of studied groups.

Table S2. Optimization of  $\mu$ PAC column chromatography gradient.

Table S3. Gradient time and flow optimization of  $\mu$ PAC column.

Table S4. Sample load optimization of  $\mu$ PAC column.

Table S5. Basic statistics of ion-chromatogram libraries.

Table S6. Analysis of mixed human muscle biopsy samples (n=3) performed with the use of different ion-chromatogram library combinations and DirectDIA™.

Table S7. Analysis of study-wide muscle biopsy samples (n=48) performed with the use of respective ion-chromatogram libraries and DirectDIA™ approach.

Figure S1. Retention time stability and FWHM of sample-spiked iRT peptides and total ion chromatograms (TIC) of experimental samples.

Figure S2. Comparison of HPLC column pressure for particle-based and pillar array-based chromatography columns.

Figure S3. Stability of MS and MS/MS mass measurement of sample-spiked iRT peptides and peptides from experimental samples.

Figure S4. MS/MS level signal normalization of samples analyzed with selected ion-chromatogram libraries and DirectDIA™ approach.

Figure S5. Results of gas-phase fractionation of ions (GPF) for library generation.

Figure S6. Results of off-line high-pH fractionation (HpH) of peptides for library generation.

Figure S7. Peptide/protein identifications using different approaches for the generation of ion-chromatogram library.

Figure S8. Pathway enrichment analysis of selected diabetes-related molecular pathways and basic statistics of molecular pathways identified with a given ion-chromatogram library and DirectDIA™ approach (table insert).

Figure S9. Comparison of the results of IGT vs NGT differential expression analysis at various stages of protein identification and quantitation.

Figure S10. Correlation analysis of protein expression from IGT vs NGT comparison.

### **Supplement\_2.xlsx**

Table\_S1\_24mz STW (Sample) – Staggered windows placement for sample acquisition method.

Table\_S2\_4mz STW (GPF) – Staggered windows placement for gas-phase fractionation method.

Table\_S3\_IPA\_Pathways – Comparison of results - affected pathways (IPA analysis).

Table\_S4\_IPA\_Disease\_Bio\_Funct – Comparison of results – diseases and bio-functions (IPA analysis).

Table\_S5\_IPA\_Molecules – Comparison of results – identified proteins and their IGT/NGT differential expression ratios (IPA analysis).

Table\_S6\_HpH\_IPA\_Report – Full IPA report of dataset analyzed with HpH ion-chromatogram library.

Table\_S7\_GPF\_IPA\_Report – Full IPA report of dataset analyzed with GPF ion-chromatogram library.

Table\_S8\_DirectDIA\_IPA\_Report – Full IPA report of dataset analyzed with DirectDIA™ approach.

Table\_S9\_HpH\_STRING – Results of protein functional clustering performed on dataset analyzed with HpH ion-chromatogram library.

Table\_S10\_GPF\_STRING – Results of protein functional clustering performed on dataset analyzed with GPF ion-chromatogram library.

Table\_S11\_DirectDIA\_STRING – Results of protein functional clustering performed on dataset analyzed with DirectDIA™ approach.

**Table S1. Post-exercise characteristics of the studied groups.** NGT - normal fasting glucose and normal glucose tolerance; IGT – impaired fasting glucose and impaired glucose tolerance; HbA1c – Haemoglobin A1c; OGTT AUC – oral glucose tolerance test area under plasma glucose concentration curve; INS AUC – oral glucose tolerance test area under plasma insulin concentration curve; HOMA2 (%B) – homeostatic model assessment of beta cell function; HOMA2 (%S) – homeostatic model assessment of insulin sensitivity; HOMA2-IR - homeostatic model assessment for insulin resistance; BMI – body mass index; SMM – skeletal muscle mass; Total\_Bone\_Mass – bone mass; Total\_Fat\_Mass – body fat mass (both the surface level and internal fat); Total\_Lean\_Mass – fat-free mass; VAT\_DXA – dual-energy X-ray absorptiometry (DXA)-derived visceral adipose tissue (VAT); Chol – cholesterol; TG – triglycerides; HDL – high-density lipoprotein cholesterol; LDL – low-density lipoprotein cholesterol; VO<sub>2</sub>max – maximal oxygen consumption.

|                                 | NGT          | IGT           |
|---------------------------------|--------------|---------------|
| Age (y)                         | 48.00±7.11   | 48.64±8.45    |
| Weight (kg)                     | 88.00±9.32   | 98.21±13.20   |
| HbA1c (%)                       | 5.07±0.39    | 5.46±0.23*    |
| Fasting glucose (mg/dl)         | 99.38±5.28   | 111.82±6.05*  |
| Fasting insulin (mIU/L)         | 9.60±4.23    | 22.09±11.03*  |
| OGTT AUC (AU)                   | 24670±4712   | 34175±4533*   |
| INS AUC (AU)                    | 13433±6098   | 29982±11839*  |
| HOMA2 %B                        | 89.56±28.09  | 127.52±51.42* |
| HOMA2 %S                        | 94.15±42.84  | 41.75±18.83*  |
| HOMA2 IR                        | 1.27±0.56    | 2.92±1.37*    |
| BMI                             | 27.62±3.35   | 32.40±4.73*   |
| SMM (kg)                        | 36.72±2.25   | 37.02±4.37    |
| Body fat (kg)                   | 22.91±7.43   | 32.75±10.02*  |
| Total_Bone_Mass (kg)            | 3.11±0.48    | 3.09±0.38     |
| Total_Fat_Mass (kg)             | 25.29±6.97   | 33.15±7.81*   |
| Total_Lean_Mass (kg)            | 59.74±4.49   | 61.85±6.47    |
| VAT_DXA(kg)                     | 1.57±0.65    | 2.64±1.05*    |
| Chol                            | 195.6±38.2   | 212.3±31.2    |
| TG                              | 91.8±36.4    | 161.0±66.2*   |
| HDL                             | 53.08±13.63  | 53.55±15.65   |
| LDL                             | 132.7±38.6   | 142.1±22.3    |
| VO <sub>2</sub> max (ml/min/kg) | 34.52±5.17   | 29.77±3.01*   |
| VO <sub>2</sub> max (ml/min)    | 3022.5±434.1 | 2908.9±373.0  |

Values are mean ± SD (NGT n = 13; IGT n=11); \*-p < 0.05 vs. NGT; significance by Mann Whitney U test.

**Table S2. Optimization of  $\mu$ PAC column chromatography gradient.** All runs were performed in triplicate on 200ng of HeLa protein digest standard in Top 20 DDA mode as described in Materials and Methods. Column flow rate 300nl/min.

|                 | $\mu$ PAC column gradient |                   |                       |
|-----------------|---------------------------|-------------------|-----------------------|
|                 | G1 (55min standard)       | G2 (85min linear) | G3 (85min non-linear) |
| #MS             | 12604                     | 17645             | 16299                 |
| #MS/MS          | 41837                     | 72496             | 77983                 |
| #PSMs           | 26224                     | 41611             | 44399                 |
| #Peptides       | 10587                     | 16114             | 17174                 |
| #Sequences      | 10189                     | 14961             | 16023                 |
| #Protein Groups | 1849                      | 2461              | 2534                  |
| #Proteins       | 2240                      | 2827              | 2917                  |

**Gradient G1 (55min standard)** – 4%B-4min, 25%B-35min, 40%B-45min, 90%B (1 $\mu$ l/min)-46min, 90%B (1 $\mu$ l/min)-49min, 4%B-50min, 4%B-55min.

**Gradient G2 (85min linear)** – 4%B-4min, 45%B-64min, 90%B-65min, 90%B-75min, 1.1%B-76min, 5%B-85min.

**Gradient G3 (85min non-linear)** – 4%B-4min, 30%B-49min, 45%B-64min, 90%B-65min, 90%B-75min, 5%B-76min, 4%B-85min.

A-0.2% FA; B-90%ACN 0.2%FA.

Values are cumulative totals from triplicate runs (n=3).

**Table S3. Gradient time and flow optimization of  $\mu$ PAC column.** Gradient steps across different run times were normalized proportionately to the total length of the gradient, except initial trap loading time. Non-linear optimized G3 gradient was used as the starting point. Runs were performed in triplicate on 200ng of HeLa protein digest standard in Top 20 DDA mode as described in Materials and Methods.

|                 | $\mu$ PAC column gradient |                         |                         |                           |
|-----------------|---------------------------|-------------------------|-------------------------|---------------------------|
|                 | G3 (45min)<br>500nl/min   | G3 (55min)<br>400nl/min | G3 (85min)<br>300nl/min | G3 (115min)*<br>300nl/min |
| #MS             | 10565                     | 13686                   | 16299                   | 18511                     |
| #MS/MS          | 51828                     | 64017                   | 77983                   | 81800                     |
| #PSMs           | 35238                     | 41922                   | 44399                   | 50518                     |
| #Peptides       | 13490                     | 15625                   | 17174                   | 18660                     |
| #Sequences      | 12822                     | 14736                   | 16023                   | 17217                     |
| #Protein Groups | 2283                      | 2513                    | 2534                    | 2762                      |
| #Proteins       | 2649                      | 2917                    | 2917                    | 3203                      |

**G3-Gradient:** 5%B-4min, 30%B-71min, 45%B-94min, 90%B-95min, 90%B-103min, 5%B-104min, 5%B-115min.

A-0.2% FA; B-90%ACN 0.2%FA.

\* - selected gradient length/flow settings.

Values are cumulative totals from triplicate runs (n=3).

**Table S4. Sample load optimization of  $\mu$ PAC column.** Runs were performed in triplicate on HeLa protein digest standard. Mass spectrometer operated in Top 20 DDA mode as described in Materials and Methods. Column flow rate 300nl/min.

|                 | $\mu$ PAC column gradient |                      |                        |                       |
|-----------------|---------------------------|----------------------|------------------------|-----------------------|
|                 | G3 (115min)<br>250ng      | G3 (115min)<br>500ng | G3 (115min) *<br>750ng | G3 (115min)<br>1000ng |
| #MS             | 21207                     | 20146                | 19832                  | 19380                 |
| #MS/MS          | 120337                    | 125167               | 126635                 | 128413                |
| #PSMs           | 66171                     | 69769                | 71090                  | 71066                 |
| #Peptides       | 23016                     | 23780                | 24199                  | 24505                 |
| #Sequences      | 20944                     | 21485                | 21682                  | 21839                 |
| #Protein Groups | 3423                      | 3482                 | 3609                   | 3616                  |
| #Proteins       | 3887                      | 3912                 | 4058                   | 4060                  |

**G3-Gradient:** 5%B-4min, 30%B-71min, 45%B-94min, 90%B-95min, 90%B-103min, 5%B-104min, 5%B-115min

A-0.2% FA; B-90%ACN 0.2%FA.

\* - selected column load setting.

Values are cumulative totals from triplicate runs (n=3).

**Table S5. Basic statistics of ion-chromatogram libraries.** Individual ion-chromatogram libraries were created from mixed human muscle biopsy samples analyzed with gas-phase fractionation (GPF, 4m/z STW), full mass-range staggered-windows method (24m/z STW) and high-pH fractionation with fraction concatenation using full mass-range DDA (Top 20) or STW (24m/z STW) method (HpH/DDA and HpH/STW, respectively), as described in Materials and Methods. Hybrid libraries were supplemented with additional 3 independent runs performed with full mass-range Top 20 DDA or 24m/z STW method.

|                 | Ion-chromatogram libraries – library statistics |                               |                                 |         |         |                               |                                 |                         |
|-----------------|-------------------------------------------------|-------------------------------|---------------------------------|---------|---------|-------------------------------|---------------------------------|-------------------------|
|                 | GPF/STW                                         | GPF/STW<br>(+3xSTW)<br>HYBRID | GPF/STW *<br>(+3xDDA)<br>HYBRID | HpH/DDA | HpH/STW | HpH/STW<br>(+3xSTW)<br>HYBRID | HpH/DDA *<br>(+3xDDA)<br>HYBRID | DirectDIA™ *<br>(6xSTW) |
| #Fragments      | 108950                                          | 118819                        | 133902                          | 193493  | 127966  | 140008                        | 202576                          | 96564                   |
| #PSMs           | 19406                                           | 21109                         | 23249                           | 33370   | 22978   | 24953                         | 34740                           | 16823                   |
| #Peptides       | 15343                                           | 16540                         | 14820                           | 26880   | 18037   | 19529                         | 23372                           | 10314                   |
| #Sequences      | 11722                                           | 11974                         | 13609                           | 21354   | 14018   | 14533                         | 21664                           | 9466                    |
| #Protein Groups | 1620                                            | 1605                          | 1573                            | 2600    | 1763    | 1807                          | 2515                            | 1138                    |
| #Proteins       | 1717                                            | 1690                          | 1666                            | 2691    | 1860    | 1913                          | 2607                            | 1213                    |
| #Single Hits    | 375                                             | 336                           | 259                             | 499     | 372     | 386                           | 454                             | 224                     |

**GPF/STW** – 6 gas-phase fractions (4m/z GPF-STW method).

**GPF/STW (+3xSTW) HYBRID** – 6 gas-phase fractions (4m/z STW) supplemented with 3 full-mass range STW runs (24m/z STW).

**GPF/STW (+3xDDA) HYBRID** – 6 gas-phase fractions (4m/z STW) supplemented with 3 full-mass range DDA runs (Top 20 DDA).

**HpH/DDA** – 6 high-pH concatenated fractions (Top 20 x DDA method).

**HpH/STW** – 6 high-pH concatenated fractions (24m/z STW).

**HpH/STW (+3xSTW) HYBRID** - 6 high-pH concatenated fractions (Top 20 x DDA) supplemented with 3 full-mass range STW runs (24m/z STW).

**HpH/DDA (+3xDDA) HYBRID** - 6 high-pH concatenated fractions (Top 20 x DDA) supplemented with 3 full-mass range DDA runs (Top 20 x DDA).

**DirectDIA™ (6xSTW)** – library-less DirectDIA™ assay from 6 independent STW runs (24m/z STW).

\* - selected for further evaluation.

Values as given by Spectronaut (Library perspective)



**Table S6. Analysis of mixed human muscle biopsy samples (n=3) performed with the use of different ion-chromatogram library combinations and DirectDIA™ approach.** Mixed muscle biopsy samples were analyzed with full-mass range 24m/z STW as described in Materials and Methods. Subsequently, different ion-chromatogram libraries were used for protein identification.

|                     | Ion-chromatogram libraries – sample identification |                               |                                 |         |         |                               |                                 |                         |
|---------------------|----------------------------------------------------|-------------------------------|---------------------------------|---------|---------|-------------------------------|---------------------------------|-------------------------|
|                     | GPF/STW                                            | GPF/STW<br>(+3xSTW)<br>HYBRID | GPF/STW *<br>(+3xDDA)<br>HYBRID | HpH/DDA | HpH/STW | HpH/STW<br>(+3xSTW)<br>HYBRID | HPH/DDA *<br>(+3xDDA)<br>HYBRID | DirectDIA™ *<br>(3xSTW) |
| #PSMs               | 18408                                              | 20332                         | 22210                           | 20194   | 18837   | 22736                         | 21636                           | 12920                   |
| #Peptides           | 14608                                              | 15958                         | 17521                           | 16499   | 14958   | 18540                         | 17084                           | 10364                   |
| #Sequences          | 12113                                              | 12565                         | 14174                           | 14007   | 12683   | 15378                         | 13710                           | 8390                    |
| #Protein Groups     | 1453                                               | 1488                          | 1595                            | 1358    | 1324    | 1469                          | 1532                            | 1041                    |
| #Proteins           | 1539                                               | 1567                          | 1665                            | 1409    | 1412    | 1528                          | 1601                            | 1115                    |
| #Peptides/Protein   | 7.9                                                | 8.1                           | 8.6                             | 8.8     | 8.6     | 8.8                           | 9                               | 8.1                     |
| Explained TIC       | 50%                                                | 52%                           | 61%                             | 62%     | 64%     | 63%                           | 65%                             | 61%                     |
| Completeness        | 93%                                                | 94%                           | 92%                             | 86%     | 90%     | 86%                           | 90%                             | 100.0%                  |
| Lib. Recovery       | 95%                                                | 96%                           | 94%                             | 61%     | 82%     | 64%                           | 62%                             | 100.0%                  |
| Median CVs (pep)    | 21%                                                | 21%                           | 15%                             | 13%     | 13%     | 14%                           | 15%                             | 18%                     |
| Median CVs (prot)   | 17%                                                | 17%                           | 11%                             | 10%     | 11%     | 10%                           | 11%                             | 15%                     |
| Median XIC-W (min.) | 5.1                                                | 3                             | 2.9                             | 5.2     | 5.6     | 3.9                           | 3.9                             | 2.7                     |
| Median DPPP         | 8.3                                                | 8.3                           | 8.3                             | 8.3     | 8.3     | 8.3                           | 8.3                             | 8.3                     |

\* - final selection, referred in manuscript as GPF hybrid approach, HpH hybrid approach and DirectDIA™ approach, respectively.

Values are sparse profiles from triplicate runs (n=3) as given by Spectronaut (Post-analysis perspective).

Median XIC-W – median window width used for the localization of the peptide extracted ion chromatograms (XIC) - does not correspond to FWHM.

DPPP - data points per peak (full width), as measured at FWHM\*1.7.

**Table S7. Analysis of study-wide muscle biopsy samples (n=48) performed with the use of respective ion-chromatogram libraries and DirectDIA™ approach.** Study samples were analyzed with full-mass range 24m/z STW as described in Materials and Methods. Subsequently, best-performing approaches were used for protein identification.

|                     | Ion-chromatogram libraries<br>(whole sample set) |           |            |
|---------------------|--------------------------------------------------|-----------|------------|
|                     | HPH/DDA-H                                        | GPF/STW-H | DirectDIA™ |
| #PSMs               | 19071                                            | 20210     | 22272      |
| #Peptides           | 15635                                            | 16087     | 17777      |
| #Sequences          | 13177                                            | 13164     | 11562      |
| #Protein Groups     | 1465                                             | 1465      | 1218       |
| #Proteins           | 1526                                             | 1554      | 1282       |
| #Peptides/Protein   | 9.2                                              | 9.4       | 9.8        |
| Explained TIC       | 68%                                              | 57%       | 71%        |
| Completeness        | 64%                                              | 84%       | 90%        |
| Lib. Recovery       | 86%                                              | 99%       | 100%       |
| Median CVs (pep)    | 38%                                              | 36%       | 32%        |
| Median CVs (prot)   | 33%                                              | 33%       | 31%        |
| Median XIC-W (min.) | 4.2                                              | 3.8       | 3.2        |
| Median DPPP         | 9.2                                              | 9.2       | 9.8        |

Values are 0.5 percentile sparse profiles (proteins present in at least 50% of the samples) from whole sample set, as given by Spectronaut (Post-analysis perspective).

Median XIC-W – median window width used for the localization of the peptide extracted ion chromatograms (XIC) - does not correspond to FWHM.

DPPP - data points per peak (full width), as measured at FWHM\*1.7.

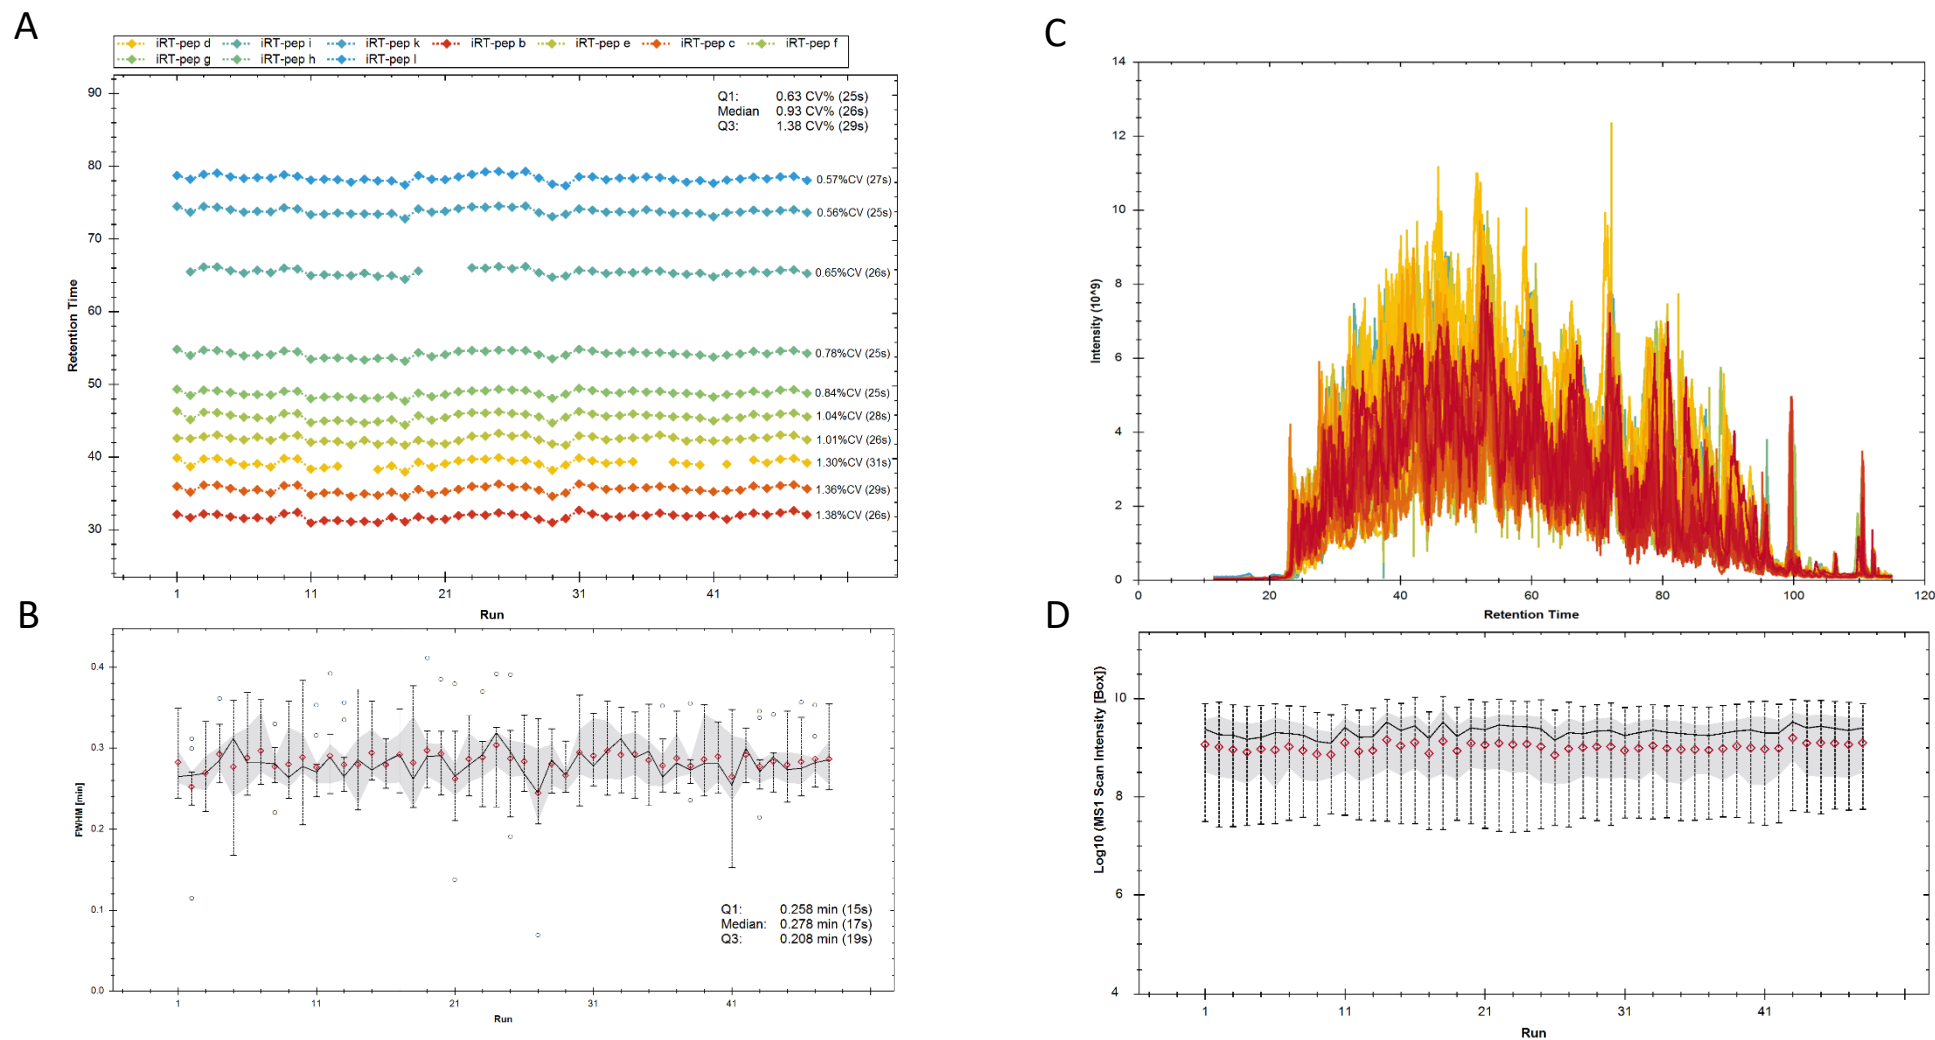

**Figure S1. Retention time stability of sample-spiked iRT peptides and total ion chromatograms (TIC) of experimental samples. Panel A – Retention time variation of individual iRT peptides. Panel B – Full width at half maximum (FWHM) values of sample-spiked iRT peptides. Panel C – Overlay of total ion chromatograms (TIC) of 48 experimental samples. Panel D – MS1 level detector response of experimental samples.**

A

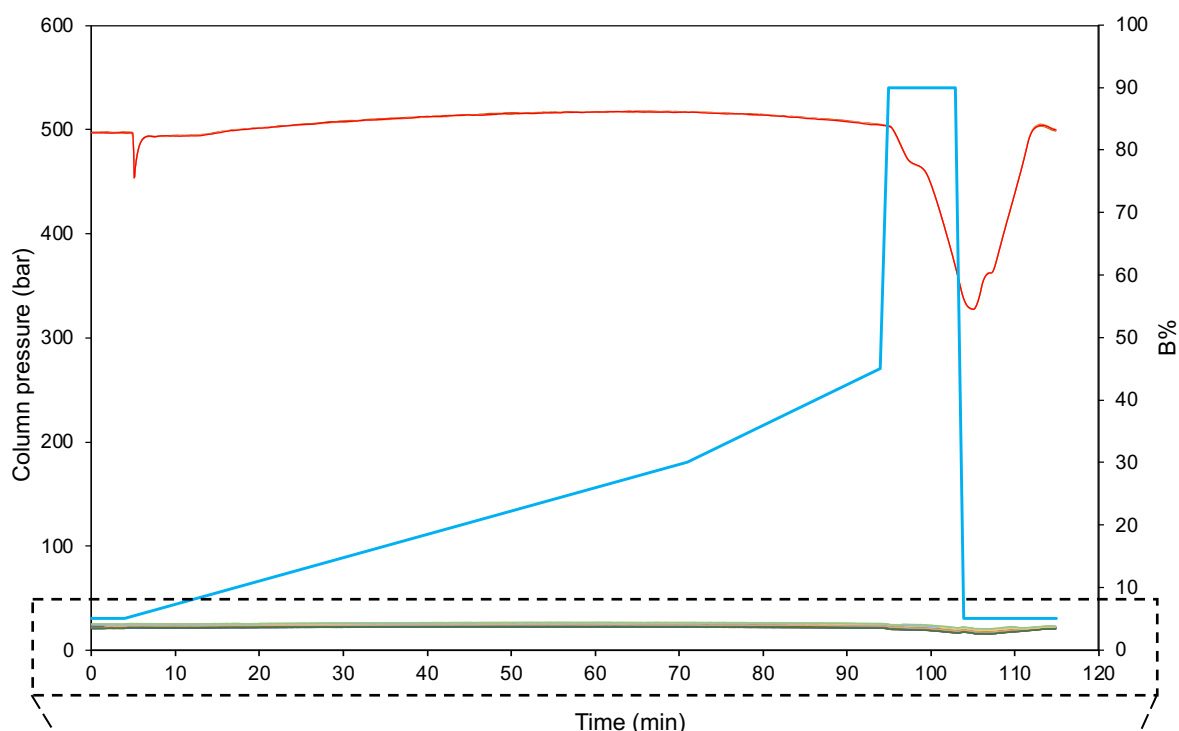

B

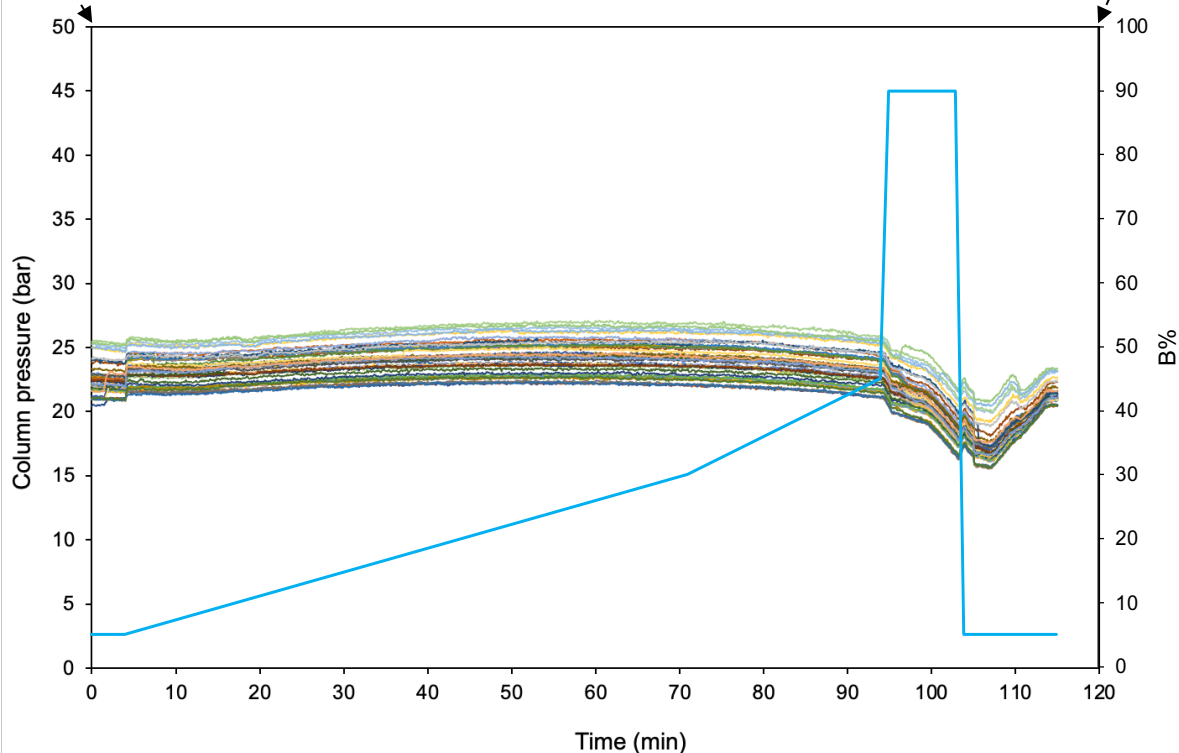

**Figure S2. Comparison of HPLC column pressure for particle-based and pillar array-based chromatography columns. Panel A** – Pressure plot of 50cm capillary nanoflow column (50cm dl, 75μm ID, 2μm grain, C18). **Panel B** – Pressure plots of 48 consecutive skeletal muscle sample runs performed on 50cm μPAC column (channel length 500mm, channel width 315μm, pillar height 18μm, pillar diameter 5μm, interpillar distance 2.5μm). Both columns operated under identical 115min gradient time and shape (blue plot, right axis), flow rates (300nl/min) and mobile phases (A-0.2% FA in H<sub>2</sub>O; B-90%ACN, 0.2%FA in H<sub>2</sub>O).

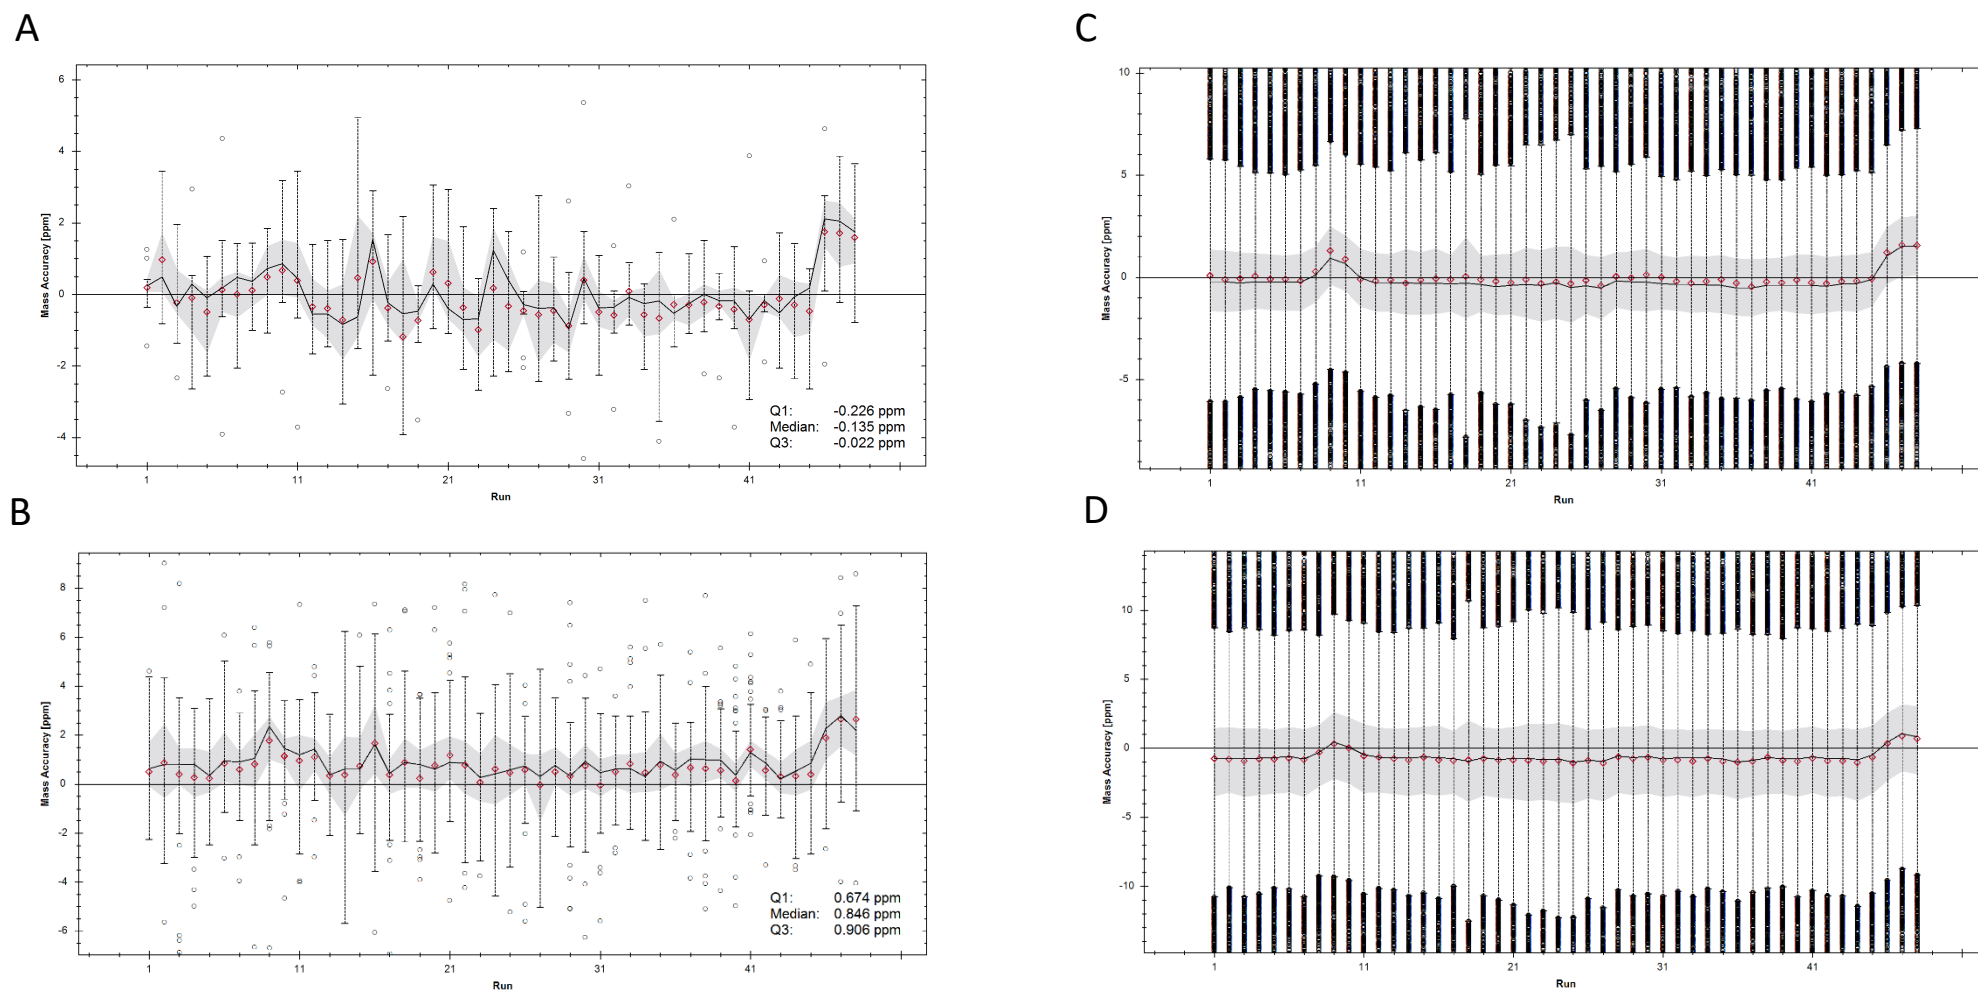

**Figure S3. Stability of MS and MS/MS mass measurement of sample-spiked iRT peptides and peptides from experimental samples. Panel A** - Accuracy of full MS mass measurement of sample-spiked iRT peptides. **Panel B** – Accuracy of MS/MS mass measurement of product ions of sample-spiked iRT peptides. **Panel C** – Accuracy of full MS mass measurement of peptides from all experimental samples. **Panel D** – Accuracy of MS/MS mass measurement of product ions of peptides from all experimental samples. Analysis was performed using staggered windows 24m/z STW method as described in Materials and Methods section.

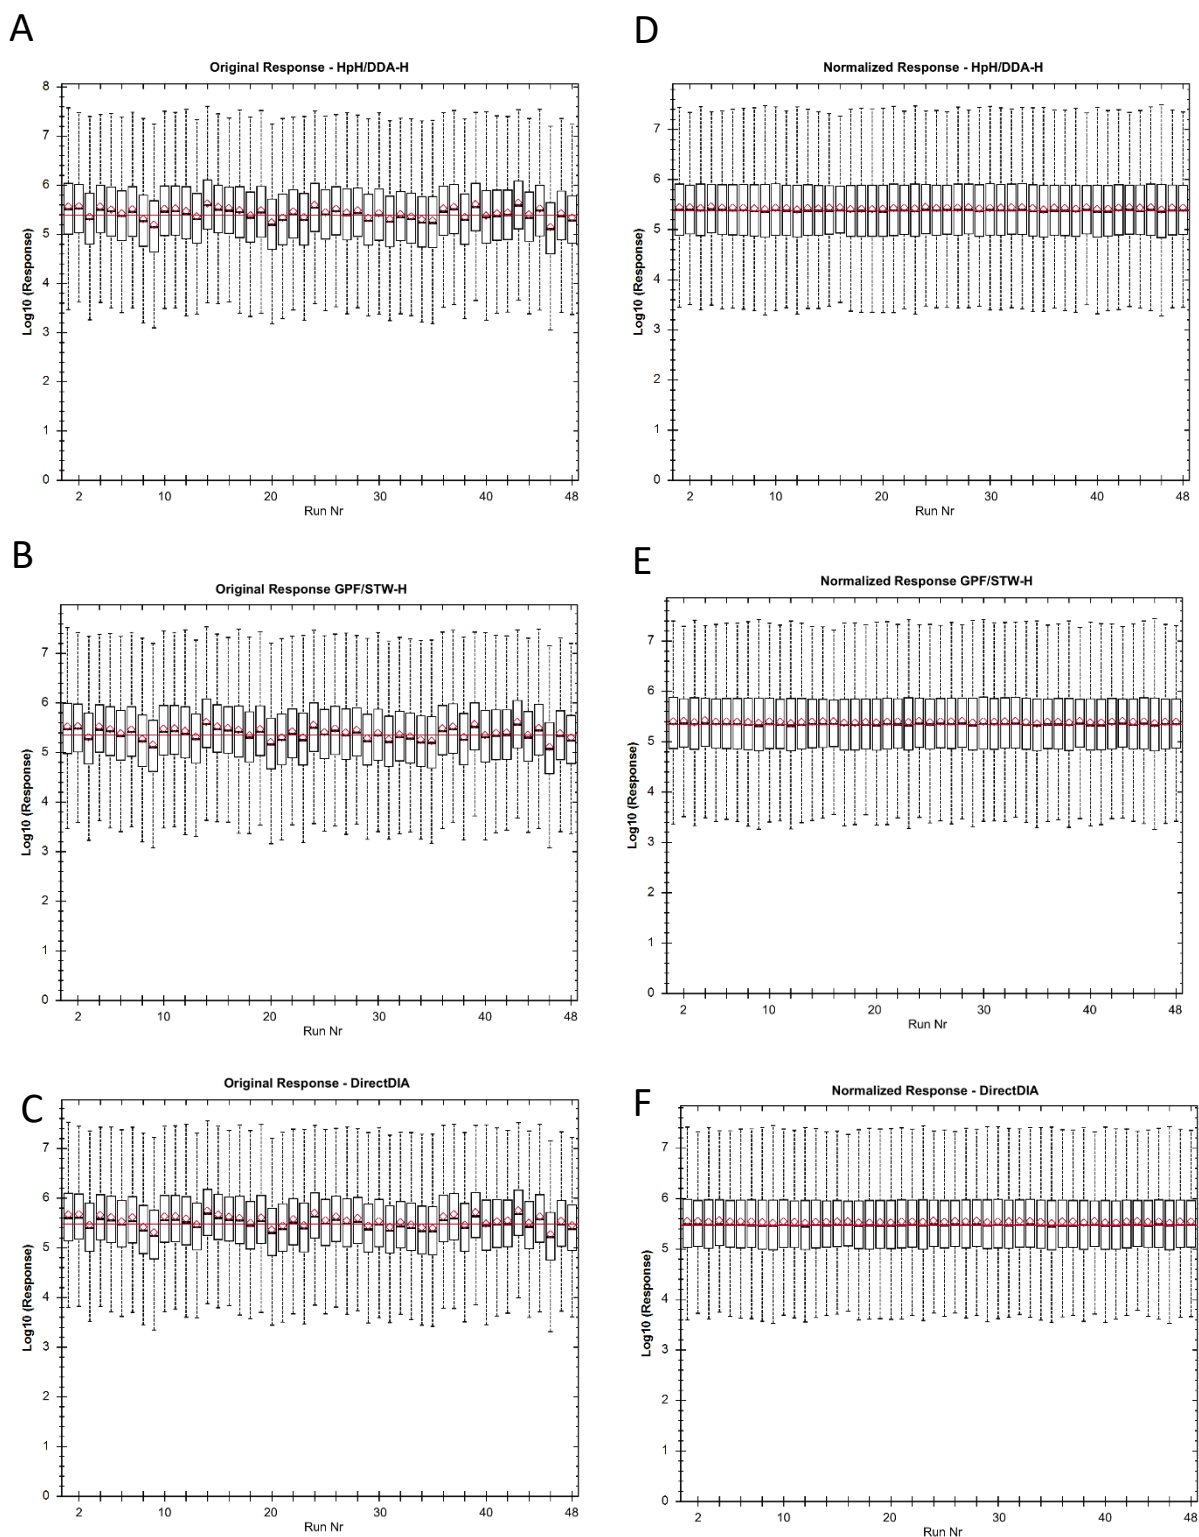

**Figure S4. MS/MS level signal normalization of samples analyzed with selected ion-chromatogram libraries and DirectDIA™ approach. Panels A, B, C**—pre-normalization MS2 level detector response of HpH/DDA-H, GPF/STW-H and DirectDIA™-analyzed samples, respectively. **Panels D,E,F**— respective post-normalization signal values. Samples were analyzed with staggered windows 24m/z STW method. Individual rectangles denote Q1 (upper line), Median (middle line) and Q3 (lower line) percentile. Mean response value is denoted by red diamonds.

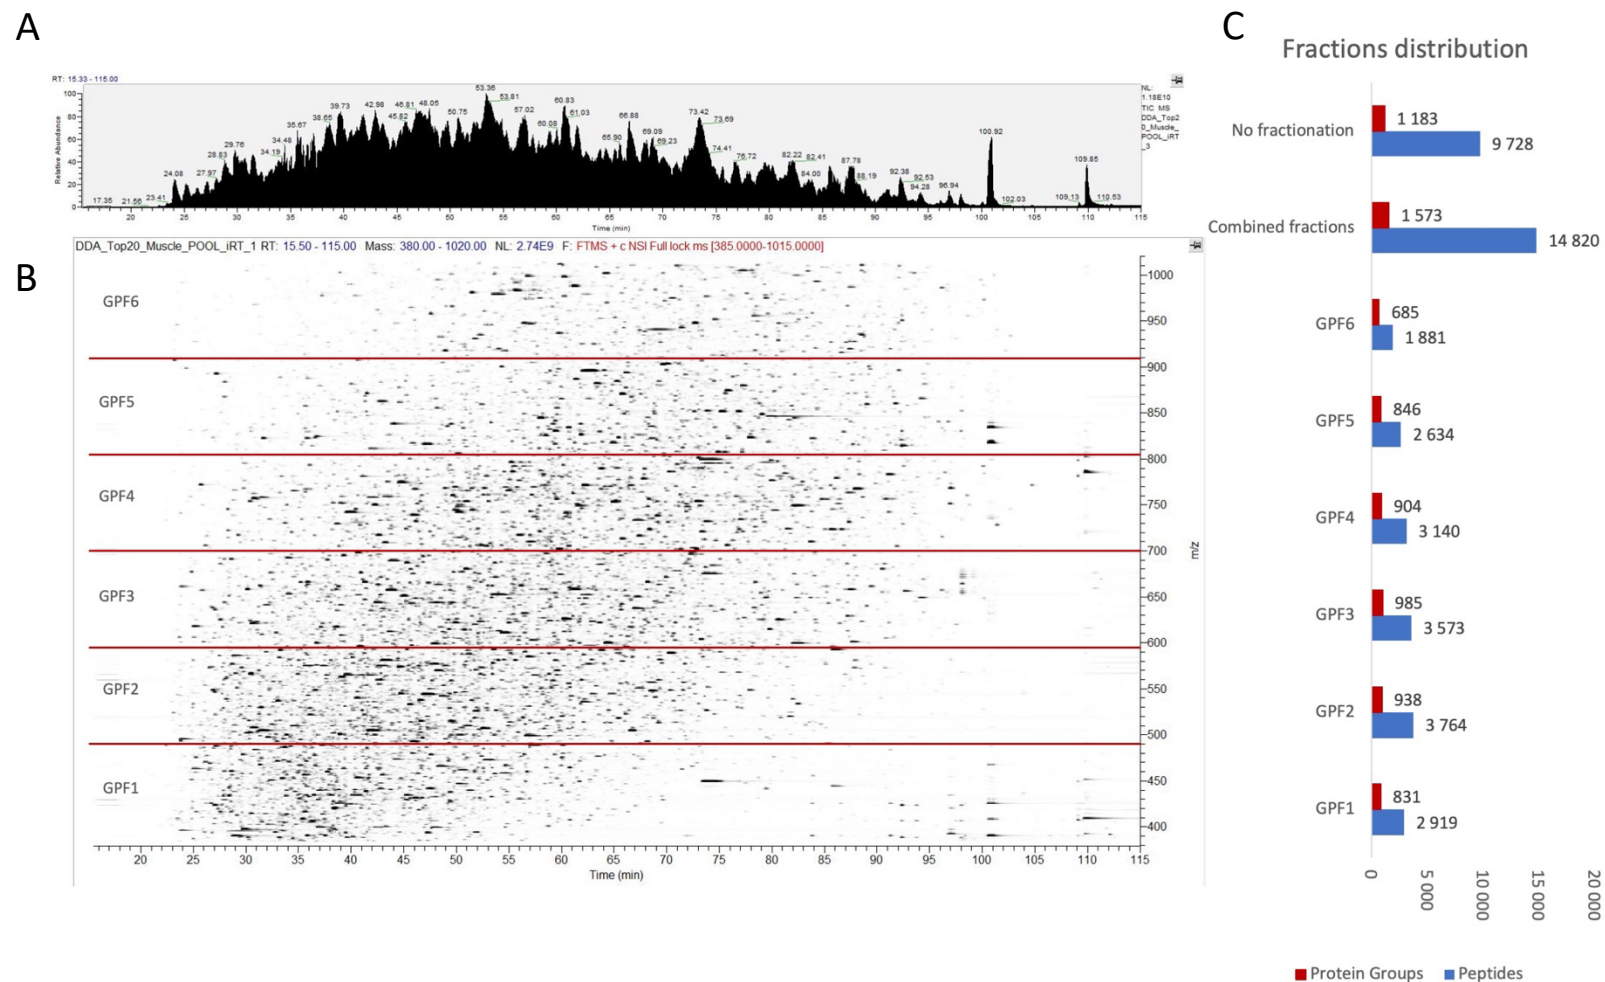

**Figure S5. Results of gas-phase fractionation of ions (GPF) for library generation. Panel A** – Total ion chromatogram from 750µg of muscle protein digest resolved on 50cm µPAC column. **Panel B** – Corresponding m/z vs time ion heat map. Red lines denote gas-phase mass fraction boundaries. **Panel C** - unique peptides/protein groups in individual gas-phase mass fractions (4m/z GPF-STW analysis). No fractionation – results from non-fractionated sample (24m/z STW method).



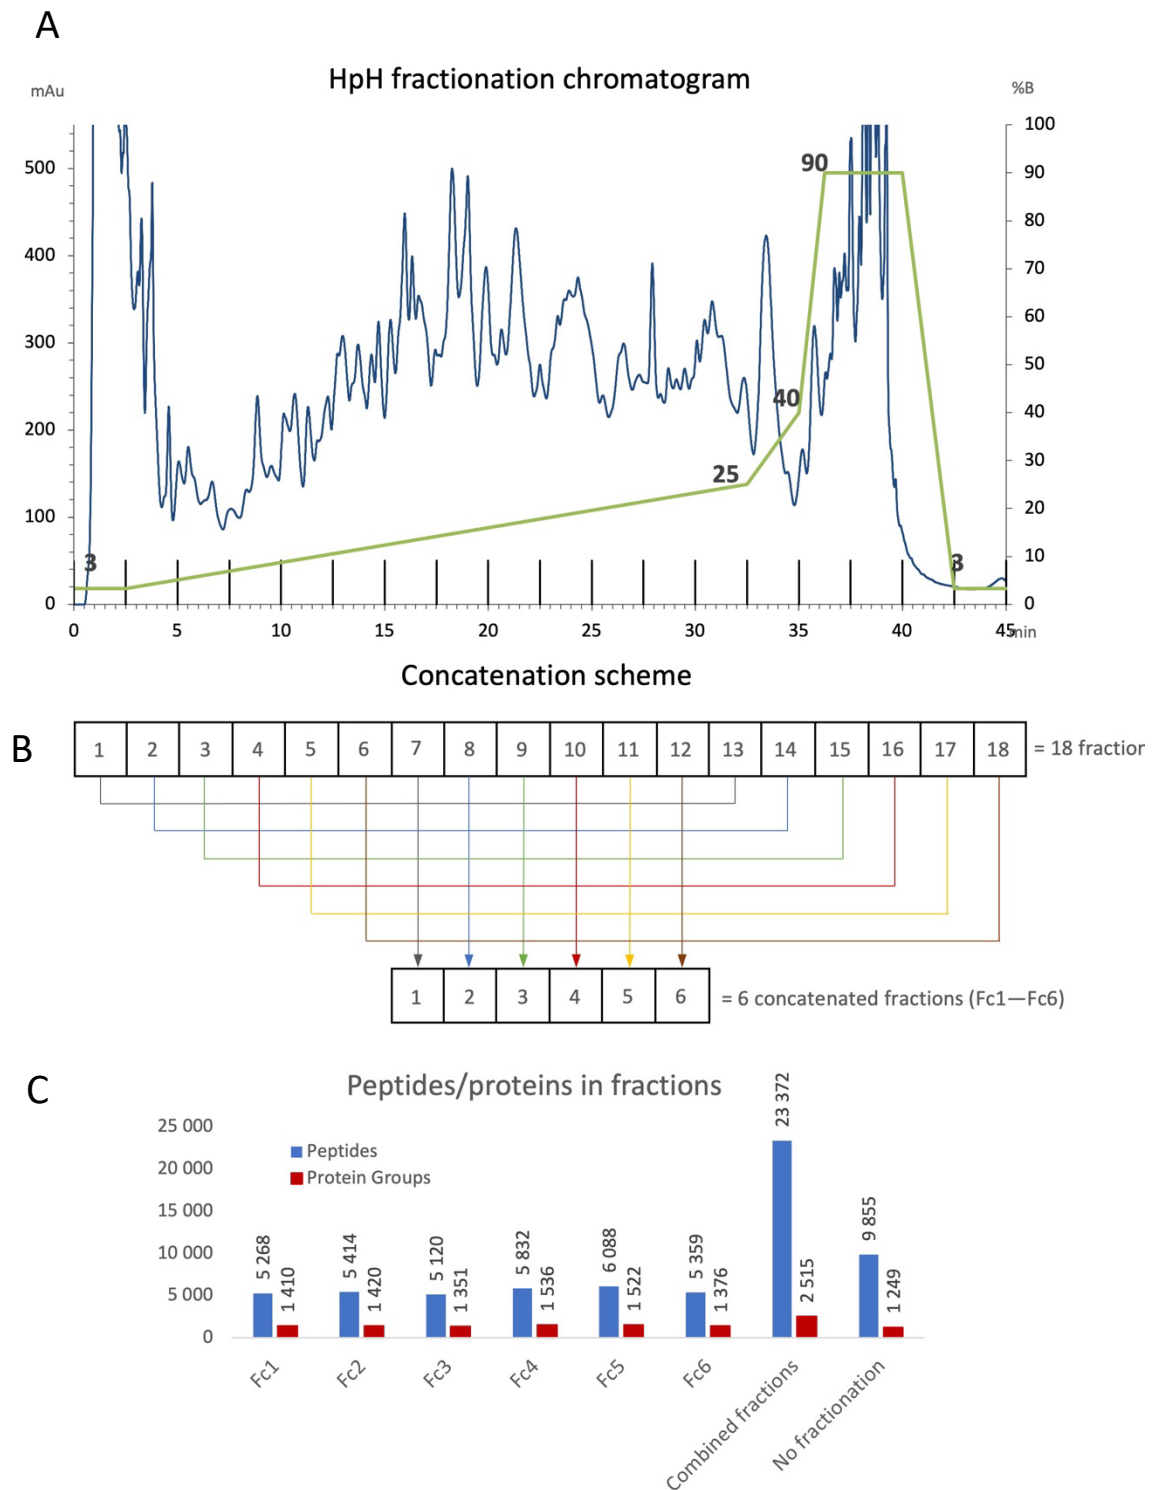

**Figure S6. Results of off-line high-pH fractionation (HpH) of peptides for library generation.** **Panel A** – 214nm absorbance chromatogram, HpH chromatographic gradient and collected fractions from 100µg of muscular protein digest. **Panel B** – fraction concatenation scheme for the equalization of peptide distribution ion fractions and improvement of orthogonality of HpH and acidic-pH chromatography. **Panel C** – unique peptides/protein groups in individual concatenated fractions (DDA analysis). No fractionation – results from non-fractionated sample (DDA analysis).



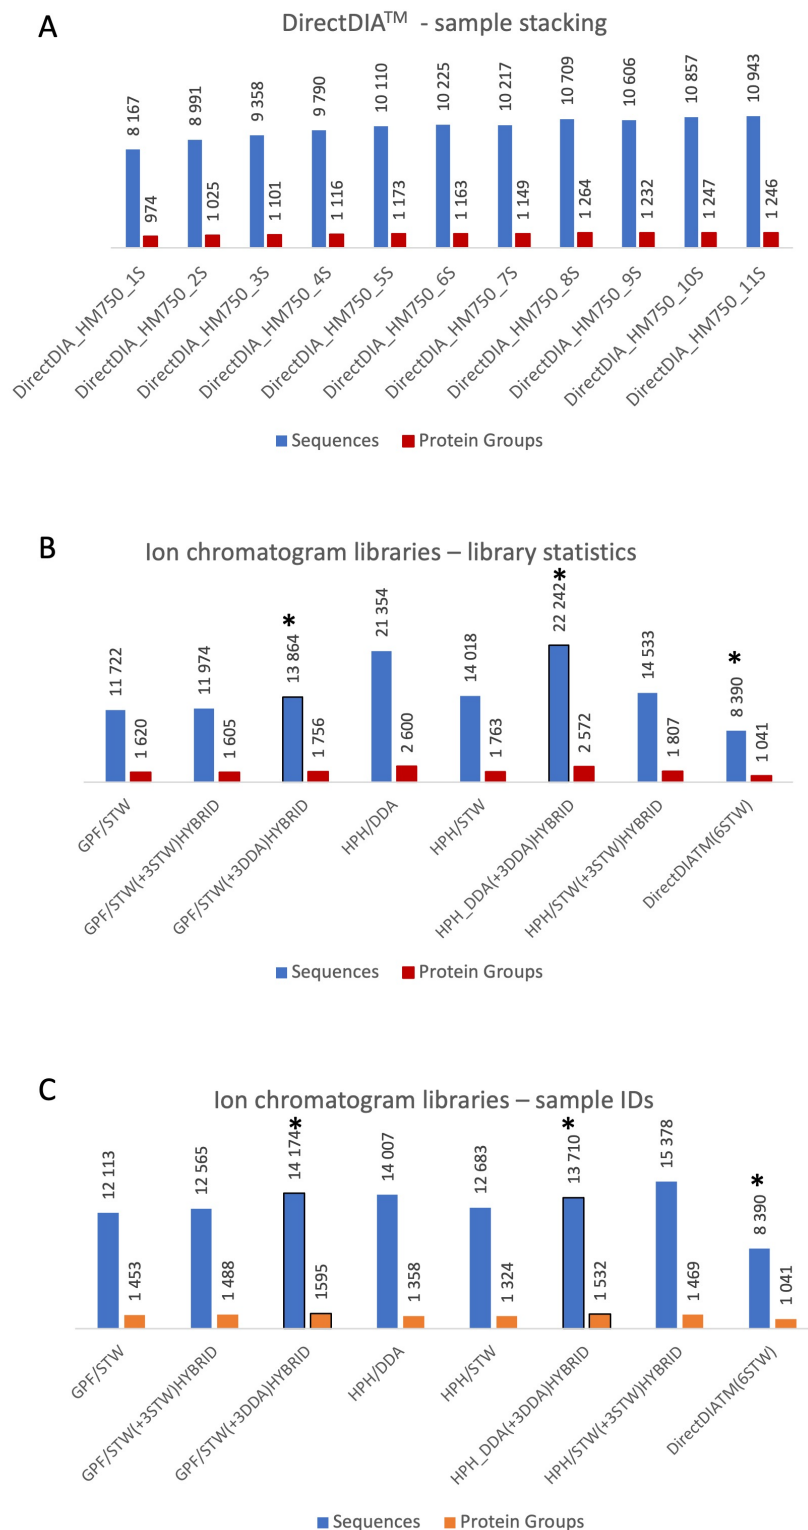

**Figure S7. Peptide/protein identifications using different approaches for the generation of ion-chromatogram library. Panel A** – The effect of sample runs stacking using multiple 24m/z STW sample runs on the number of peptides/protein groups identified with DirectDIA™ approach. **Panel B** – Basic statistics of ion-chromatogram libraries. Detailed description and results are presented in **Table S5**. **Panel C** – Basic identification results of muscle protein digest (n=3, 24m/z STW method) using appropriate library combination. Detailed description and results are presented in **Table S6**.

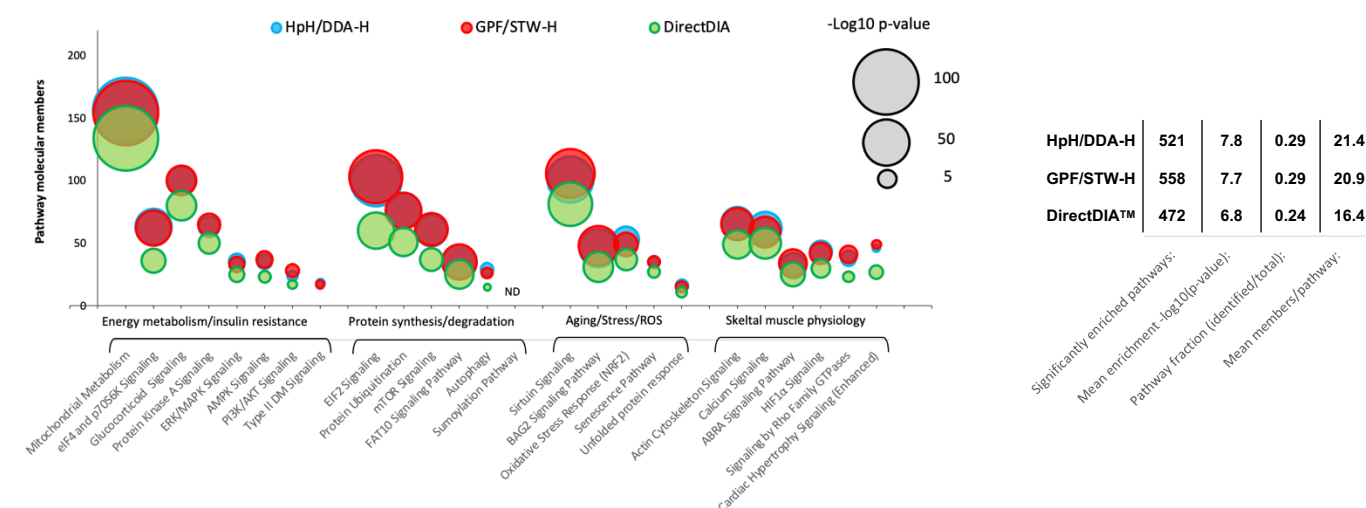

**Figure S8. Pathway enrichment analysis of selected diabetes-related molecular pathways and basic statistics of molecular pathways identified with a given ion-chromatogram library (table insert).** Bubble size represents enrichment significance of a given pathway (expressed as  $-\log_{10}(\text{p-value})$ ), whereas Y axis represents the total number of identified molecular members (proteins) of a given pathway.

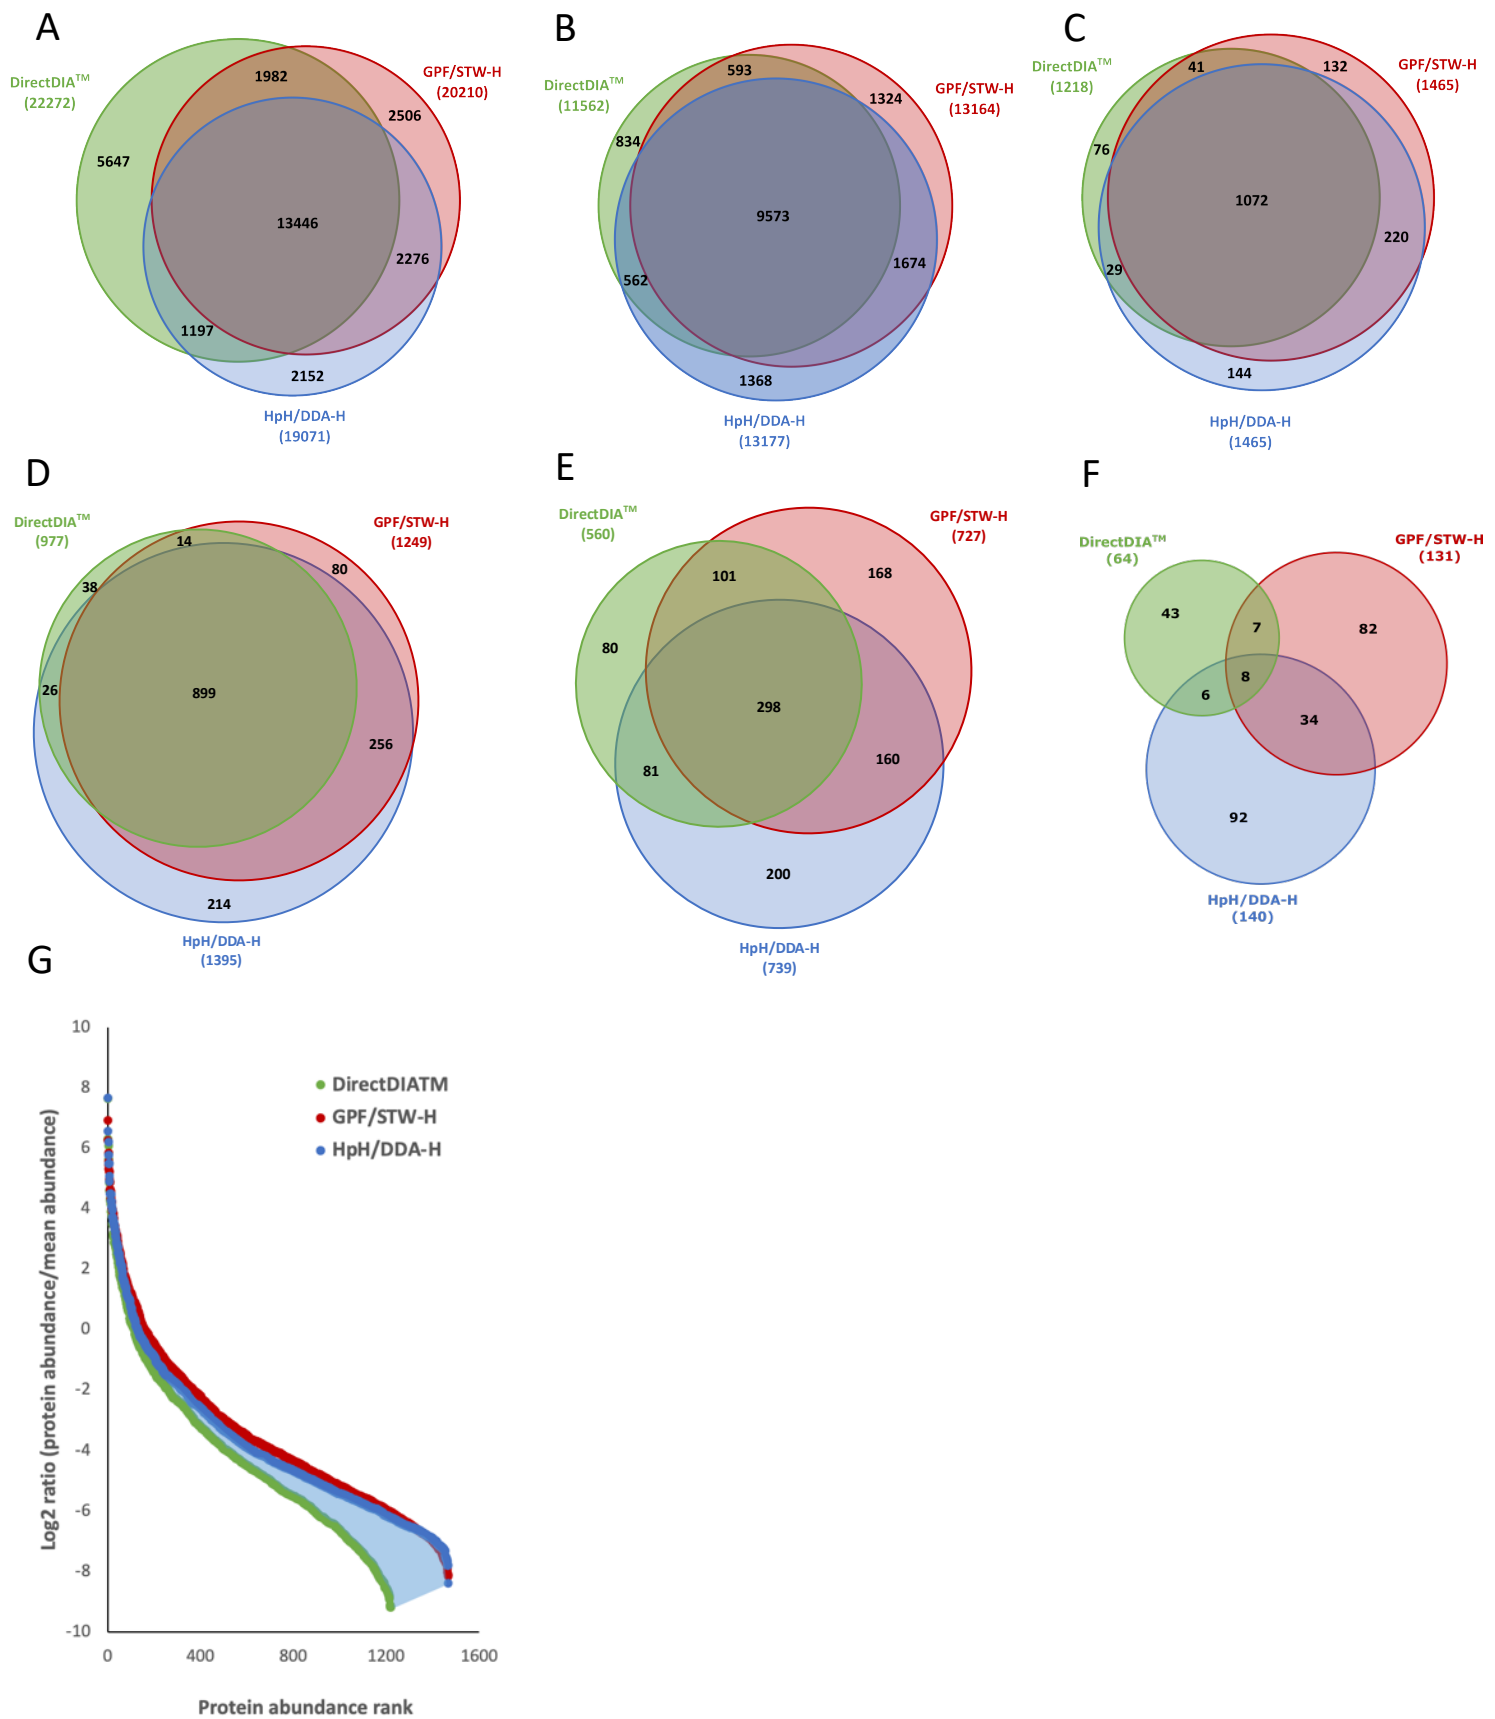

**Figure S9. Comparison of the results of IGT vs NGT differential expression analysis at various stages of protein identification and quantitation.** Venn diagrams from IGT vs NGT comparison at precursor, peptide and protein level (**Panel A to C**); Venn diagrams of proteins with  $\geq 2$  unique peptides, with FDR-corrected  $p$ -value  $< 0.05$  (Q-value  $< 0.05$ ) and with  $\pm 50\%$  fold change (additively) (**Panel D to E**); protein rank distribution plot from IGT vs NGT comparison (**Panel F**)

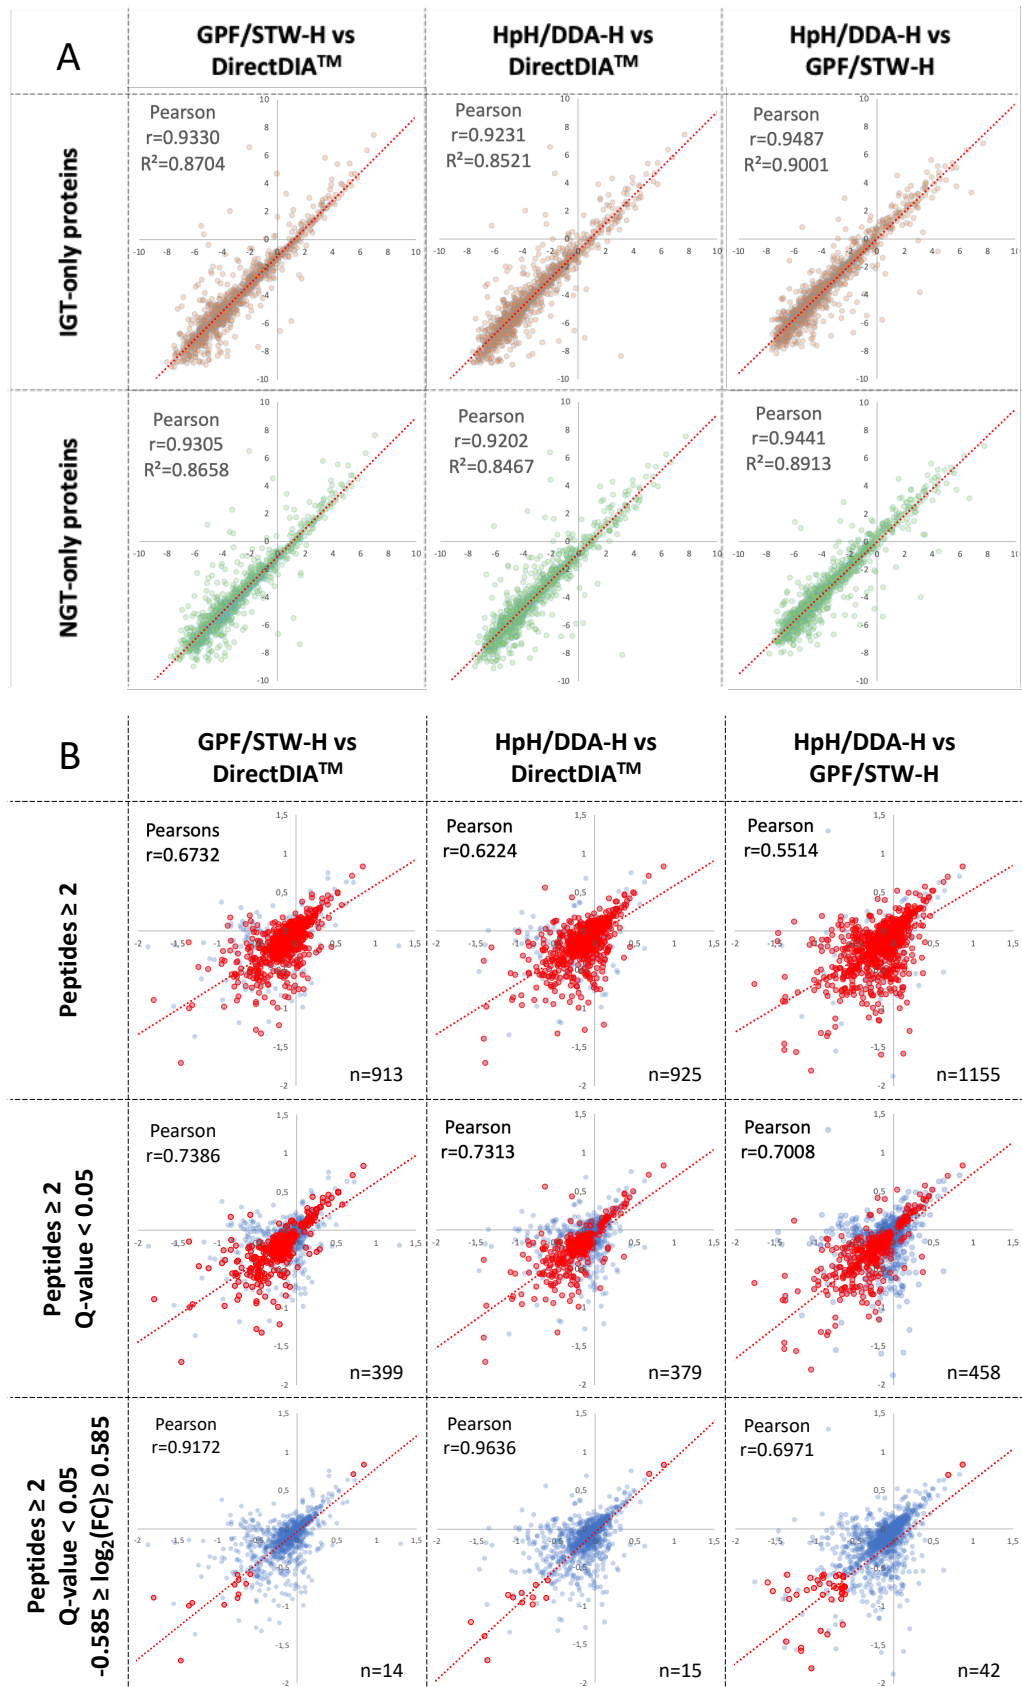

**Figure S10. Correlation analysis of protein expression from IGT vs NGT comparison.** Correlation plots of respective approaches at the level of IGT- or NGT-only samples (**Panel A**); Correlation of IGT vs NGT differential expression  $\log_2(\text{fold change})$  of proteins with  $\geq 2$  unique peptides, with FDR-corrected  $p\text{-value} < 0.05$  ( $Q\text{-value} < 0.05$ ) and with  $\pm 50\%$  difference (additively) (**Panel B**); 50% fold-change described as  $-0.585 \geq \log_2(\text{fold change}) \geq 0.585$
