# Supplementary material for: Ion-chromatogram libraries assembly in DIA proteomic analysis of post-exercise skeletal muscle in prediabetic subjects
Source: Research Square preprint supplement (doi:10.21203/rs.3.rs-6331082/v1), 2025-04-23
Supplement: Supplementary file 1 [file 2125b958d53e41a32eb923c4.xlsx]

## Sheet: Table_S1_24mz STW (Sample)
	24m/z staggered window (STW)
	Window #	Start m/z	Center m/z	End m/z
	Full MS	385.00000	700.00000	1015.00000
	1	388.43736	412.43736	424.43736
	2	424.44827	436.44827	448.44827
	3	448.45919	460.45919	472.45919
	4	472.47010	484.47010	496.47010
	5	496.48101	508.48101	520.48101
	6	520.49193	532.49193	544.49193
	7	544.50284	556.50284	568.50284
	8	568.51376	580.51376	592.51376
	9	592.52467	604.52467	616.52467
	10	616.53558	628.53558	640.53558
	11	640.54650	652.54650	664.54650
	12	664.55741	676.55741	688.55741
	13	688.56833	700.56833	712.56833
	14	712.57924	724.57924	736.57924
	15	736.59015	748.59015	760.59015
	16	760.60107	772.60107	784.60107
	17	784.61198	796.61198	808.61198
	18	808.62290	820.62290	832.62290
	19	832.63381	844.63381	856.63381
	20	856.64472	868.64472	880.64472
	21	880.65564	892.65564	904.65564
	22	904.66655	916.66655	928.66655
	23	928.67747	940.67747	952.67747
	24	952.68838	964.68838	976.68838
	25	976.69929	988.69929	1000.69929
	26	1000.71021	1012.71021	1024.71021
	Full MS	385.00000	700.00000	1015.00000
	27	388.43190	400.43190	412.43190
	28	412.44281	424.44281	436.44281
	29	436.45373	448.45373	460.45373
	30	460.46464	472.46464	484.46464
	31	484.47556	496.47556	508.47556
	32	508.48647	520.48647	532.48647
	33	532.49738	544.49738	556.49738
	34	556.50830	568.50830	580.50830
	35	580.51921	592.51921	604.51921
	36	604.53013	616.53013	628.53013
	37	628.54104	640.54104	652.54104
	38	652.55195	664.55195	676.55195
	39	676.56287	688.56287	700.56287
	40	700.57378	712.57378	724.57378
	41	724.58470	736.58470	748.58470
	42	748.59561	760.59561	772.59561
	43	772.60652	784.60652	796.60652
	44	796.61744	808.61744	820.61744
	45	820.62835	832.62835	844.62835
	46	844.63927	856.63927	868.63927
	47	868.65018	880.65018	892.65018
	48	892.66109	904.66109	916.66109
	49	916.67201	928.67201	940.67201
	50	940.68292	952.68292	964.68292
	51	964.69384	976.69384	988.69384
	52	988.70475	1000.70475	1012.70475

## Sheet: Table_S2_4mz STW (GPF)
	Gas phase fraction #1				Gas phase fraction #2				Gas phase fraction #3				Gas phase fraction #4				Gas phase fraction #5				Gas phase fraction #6
	Scan #	Start m/z	Center m/z	End m/z	Scan #	Start m/z	Center m/z	End m/z	Scan #	Start m/z	Center m/z	End m/z	Scan #	Start m/z	Center m/z	End m/z	Scan #	Start m/z	Center m/z	End m/z	Scan #	Start m/z	Center m/z	End m/z
	Full MS	395.00000	450.00000	505.00000	Full MS	495.00000	550.00000	605.00000	Full MS	595.00000	650.00000	705.00000	Full MS	695.00000	750.00000	805.00000	Full MS	795.00000	850.00000	905.00000	Full MS	895.00000	950.00000	1005.00000
	1	400.43281	402.43281	404.43281	1	498.47738	500.47738	502.47738	1	600.52376	602.52376	604.52376	1	700.56923	702.56923	704.56923	1	800.61471	802.61471	804.61471	1	900.66018	902.66018	904.66018
	2	404.43463	406.43463	408.43463	2	500.47829	502.47829	504.47829	2	604.52558	606.52558	608.52558	2	704.57105	706.57105	708.57105	2	804.61653	806.61653	808.61653	2	904.66200	906.66200	908.66200
	3	408.43645	410.43645	412.43645	3	502.47919	504.47919	506.47919	3	608.52740	610.52740	612.52740	3	708.57287	710.57287	712.57287	3	808.61835	810.61835	812.61835	3	908.66382	910.66382	912.66382
	4	412.43827	414.43827	416.43827	4	504.48010	506.48010	508.48010	4	612.52922	614.52922	616.52922	4	712.57469	714.57469	716.57469	4	812.62017	814.62017	816.62017	4	912.66564	914.66564	916.66564
	5	416.44009	418.44009	420.44009	5	506.48101	508.48101	510.48101	5	616.53104	618.53104	620.53104	5	716.57651	718.57651	720.57651	5	816.62199	818.62199	820.62199	5	916.66746	918.66746	920.66746
	6	420.44190	422.44190	424.44190	6	508.48192	510.48192	512.48192	6	620.53286	622.53286	624.53286	6	720.57833	722.57833	724.57833	6	820.62381	822.62381	824.62381	6	920.66928	922.66928	924.66928
	7	424.44372	426.44372	428.44372	7	510.48283	512.48283	514.48283	7	624.53467	626.53467	628.53467	7	724.58015	726.58015	728.58015	7	824.62562	826.62562	828.62562	7	924.67110	926.67110	928.67110
	8	428.44554	430.44554	432.44554	8	512.48374	514.48374	516.48374	8	628.53649	630.53649	632.53649	8	728.58197	730.58197	732.58197	8	828.62744	830.62744	832.62744	8	928.67292	930.67292	932.67292
	9	432.44736	434.44736	436.44736	9	514.48465	516.48465	518.48465	9	632.53831	634.53831	636.53831	9	732.58379	734.58379	736.58379	9	832.62926	834.62926	836.62926	9	932.67474	934.67474	936.67474
	10	436.44918	438.44918	440.44918	10	516.48556	518.48556	520.48556	10	636.54013	638.54013	640.54013	10	736.58561	738.58561	740.58561	10	836.63108	838.63108	840.63108	10	936.67656	938.67656	940.67656
	11	440.45100	442.45100	444.45100	11	518.48647	520.48647	522.48647	11	640.54195	642.54195	644.54195	11	740.58743	742.58743	744.58743	11	840.63290	842.63290	844.63290	11	940.67838	942.67838	944.67838
	12	444.45282	446.45282	448.45282	12	520.48738	522.48738	524.48738	12	644.54377	646.54377	648.54377	12	744.58924	746.58924	748.58924	12	844.63472	846.63472	848.63472	12	944.68019	946.68019	948.68019
	13	448.45464	450.45464	452.45464	13	522.48829	524.48829	526.48829	13	648.54559	650.54559	652.54559	13	748.59106	750.59106	752.59106	13	848.63654	850.63654	852.63654	13	948.68201	950.68201	952.68201
	14	452.45646	454.45646	456.45646	14	524.48920	526.48920	528.48920	14	652.54741	654.54741	656.54741	14	752.59288	754.59288	756.59288	14	852.63836	854.63836	856.63836	14	952.68383	954.68383	956.68383
	15	456.45828	458.45828	460.45828	15	526.49011	528.49011	530.49011	15	656.54923	658.54923	660.54923	15	756.59470	758.59470	760.59470	15	856.64018	858.64018	860.64018	15	956.68565	958.68565	960.68565
	16	460.46009	462.46009	464.46009	16	528.49102	530.49102	532.49102	16	660.55105	662.55105	664.55105	16	760.59652	762.59652	764.59652	16	860.64200	862.64200	864.64200	16	960.68747	962.68747	964.68747
	17	464.46191	466.46191	468.46191	17	530.49193	532.49193	534.49193	17	664.55286	666.55286	668.55286	17	764.59834	766.59834	768.59834	17	864.64381	866.64381	868.64381	17	964.68929	966.68929	968.68929
	18	468.46373	470.46373	472.46373	18	532.49284	534.49284	536.49284	18	668.55468	670.55468	672.55468	18	768.60016	770.60016	772.60016	18	868.64563	870.64563	872.64563	18	968.69111	970.69111	972.69111
	19	472.46555	474.46555	476.46555	19	534.49375	536.49375	538.49375	19	672.55650	674.55650	676.55650	19	772.60198	774.60198	776.60198	19	872.64745	874.64745	876.64745	19	972.69293	974.69293	976.69293
	20	476.46737	478.46737	480.46737	20	536.49466	538.49466	540.49466	20	676.55832	678.55832	680.55832	20	776.60380	778.60380	780.60380	20	876.64927	878.64927	880.64927	20	976.69475	978.69475	980.69475
	21	480.46919	482.46919	484.46919	21	538.49557	540.49557	542.49557	21	680.56014	682.56014	684.56014	21	780.60562	782.60562	784.60562	21	880.65109	882.65109	884.65109	21	980.69657	982.69657	984.69657
	22	484.47101	486.47101	488.47101	22	540.49648	542.49648	544.49648	22	684.56196	686.56196	688.56196	22	784.60743	786.60743	788.60743	22	884.65291	886.65291	888.65291	22	984.69838	986.69838	988.69838
	23	488.47283	490.47283	492.47283	23	542.49738	544.49738	546.49738	23	688.56378	690.56378	692.56378	23	788.60925	790.60925	792.60925	23	888.65473	890.65473	892.65473	23	988.70020	990.70020	992.70020
	24	492.47465	494.47465	496.47465	24	544.49829	546.49829	548.49829	24	692.56560	694.5656	696.5656	24	792.61107	794.61107	796.61107	24	892.65655	894.65655	896.65655	24	992.70202	994.70202	996.70202
	25	496.47647	498.47647	500.47647	25	546.49920	548.4992	550.49920	25	696.56742	698.56742	700.56742	25	796.61289	798.61289	800.61289	25	896.65837	898.65837	900.65837	25	996.70384	998.70384	1000.70384
	Full MS	395.00000	450.00000	505.00000	Full MS	495.00000	550.00000	605.00000	Full MS	595.00000	650.00000	705.00000	Full MS	695.00000	750.00000	805.00000	Full MS	795.00000	850.00000	905.00000	Full MS	895.00000	950.00000	1005.00000
	26	500.47828	502.47828	504.47828	26	548.50011	550.50011	552.50011	26	700.56924	702.56924	704.56924	26	800.61471	802.61471	804.61471	26	900.66019	902.66019	904.66019	26	1000.70566	1002.70566	1004.70566
	27	398.4319	400.4319	402.4319	27	550.50102	552.50102	554.50102	27	598.52285	600.52285	602.52285	27	698.56833	700.56833	702.56833	27	798.61380	800.61380	802.61380	27	898.65928	900.65928	902.65928
	28	402.43372	404.43372	406.43372	28	552.50193	554.50193	556.50193	28	602.52467	604.52467	606.52467	28	702.57014	704.57014	706.57014	28	802.61562	804.61562	806.61562	28	902.66109	904.66109	906.66109
	29	406.43554	408.43554	410.43554	29	554.50284	556.50284	558.50284	29	606.52649	608.52649	610.52649	29	706.57196	708.57196	710.57196	29	806.61744	808.61744	810.61744	29	906.66291	908.66291	910.66291
	30	410.43736	412.43736	414.43736	30	556.50375	558.50375	560.50375	30	610.52831	612.52831	614.52831	30	710.57378	712.57378	714.57378	30	810.61926	812.61926	814.61926	30	910.66473	912.66473	914.66473
	31	414.43918	416.43918	418.43918	31	558.50466	560.50466	562.50466	31	614.53013	616.53013	618.53013	31	714.57560	716.57560	718.57560	31	814.62108	816.62108	818.62108	31	914.66655	916.66655	918.66655
	32	418.44100	420.44100	422.44100	32	560.50557	562.50557	564.50557	32	618.53195	620.53195	622.53195	32	718.57742	720.57742	722.57742	32	818.62290	820.62290	822.62290	32	918.66837	920.66837	922.66837
	33	422.44281	424.44281	426.44281	33	562.50648	564.50648	566.50648	33	622.53376	624.53376	626.53376	33	722.57924	724.57924	726.57924	33	822.62471	824.62471	826.62471	33	922.67019	924.67019	926.67019
	34	426.44463	428.44463	430.44463	34	564.50739	566.50739	568.50739	34	626.53558	628.53558	630.53558	34	726.58106	728.58106	730.58106	34	826.62653	828.62653	830.62653	34	926.67201	928.67201	930.67201
	35	430.44645	432.44645	434.44645	35	566.50830	568.50830	570.50830	35	630.53740	632.5374	634.5374	35	730.58288	732.58288	734.58288	35	830.62835	832.62835	834.62835	35	930.67383	932.67383	934.67383
	36	434.44827	436.44827	438.44827	36	568.50921	570.50921	572.50921	36	634.53922	636.53922	638.53922	36	734.58470	736.58470	738.58470	36	834.63017	836.63017	838.63017	36	934.67565	936.67565	938.67565
	37	438.45009	440.45009	442.45009	37	570.51012	572.51012	574.51012	37	638.54104	640.54104	642.54104	37	738.58652	740.58652	742.58652	37	838.63199	840.63199	842.63199	37	938.67747	940.67747	942.67747
	38	442.45191	444.45191	446.45191	38	572.51103	574.51103	576.51103	38	642.54286	644.54286	646.54286	38	742.58833	744.58833	746.58833	38	842.63381	844.63381	846.63381	38	942.67928	944.67928	946.67928
	39	446.45373	448.45373	450.45373	39	574.51194	576.51194	578.51194	39	646.54468	648.54468	650.54468	39	746.59015	748.59015	750.59015	39	846.63563	848.63563	850.63563	39	946.68110	948.68110	950.68110
	40	450.45555	452.45555	454.45555	40	576.51285	578.51285	580.51285	40	650.54650	652.5465	654.5465	40	750.59197	752.59197	754.59197	40	850.63745	852.63745	854.63745	40	950.68292	952.68292	954.68292
	41	454.45737	456.45737	458.45737	41	578.51376	580.51376	582.51376	41	654.54832	656.54832	658.54832	41	754.59379	756.59379	758.59379	41	854.63927	856.63927	858.63927	41	954.68474	956.68474	958.68474
	42	458.45919	460.45919	462.45919	42	580.51467	582.51467	584.51467	42	658.55014	660.55014	662.55014	42	758.59561	760.59561	762.59561	42	858.64109	860.64109	862.64109	42	958.68656	960.68656	962.68656
	43	462.46100	464.46100	466.46100	43	582.51557	584.51557	586.51557	43	662.55195	664.55195	666.55195	43	762.59743	764.59743	766.59743	43	862.64290	864.64290	866.64290	43	962.68838	964.68838	966.68838
	44	466.46282	468.46282	470.46282	44	584.51648	586.51648	588.51648	44	666.55377	668.55377	670.55377	44	766.59925	768.59925	770.59925	44	866.64472	868.64472	870.64472	44	966.69020	968.69020	970.69020
	45	470.46464	472.46464	474.46464	45	586.51739	588.51739	590.51739	45	670.55559	672.55559	674.55559	45	770.60107	772.60107	774.60107	45	870.64654	872.64654	874.64654	45	970.69202	972.69202	974.69202
	46	474.46646	476.46646	478.46646	46	588.51830	590.51830	592.51830	46	674.55741	676.55741	678.55741	46	774.60289	776.60289	778.60289	46	874.64836	876.64836	878.64836	46	974.69384	976.69384	978.69384
	47	478.46828	480.46828	482.46828	47	590.51921	592.51921	594.51921	47	678.55923	680.55923	682.55923	47	778.60471	780.60471	782.60471	47	878.65018	880.65018	882.65018	47	978.69566	980.69566	982.69566
	48	482.47010	484.47010	486.47010	48	592.52012	594.52012	596.52012	48	682.56105	684.56105	686.56105	48	782.60652	784.60652	786.60652	48	882.65200	884.65200	886.65200	48	982.69747	984.69747	986.69747
	49	486.47192	488.47192	490.47192	49	594.52103	596.52103	598.52103	49	686.56287	688.56287	690.56287	49	786.60834	788.60834	790.60834	49	886.65382	888.65382	890.65382	49	986.69929	988.69929	990.69929
	50	490.47374	492.47374	494.47374	50	596.52194	598.52194	600.52194	50	690.56469	692.56469	694.56469	50	790.61016	792.61016	794.61016	50	890.65564	892.65564	894.65564	50	990.70111	992.70111	994.70111
	51	494.47556	496.47556	498.47556	51	600.52376	602.52376	604.52376	51	694.56651	696.56651	698.56651	51	794.61198	796.61198	798.61198	51	894.65746	896.65746	898.65746	51	994.70293	996.70293	998.70293
	52	498.47738	500.47738	502.47738	52	598.52285	600.52285	602.52285	52	698.56833	700.56833	702.56833	52	798.61380	800.61380	802.61380	52	898.65928	900.65928	902.65928	52	998.70475	1000.70475	1002.70475

## Sheet: Table_S3_IPA_Pathways
© 2000-2024 QIAGEN. All rights reserved.	HpH/DIA-H	GPF/STW-H	DirectDIA
Canonical Pathways (Z-Score)	BESD_IGT_vs_NGT_HPH_MUSCLE_2 - 2024-01-05 12:35 PM	BESD_IGT_vs_NGT_GPF_MUSCLE_2 - 2024-01-05 12:28 PM	BESD_IGT_vs_NGT_DirectDIA_MUSCLE_2 - 2024-01-05 12:37 PM
Eukaryotic Translation Initiation	-2.449	-2.236	-2.828
Neutrophil degranulation	-2.646	-2	-2.714
Selenoamino acid metabolism	-2	-2.236	-2.646
EIF2 Signaling	-2.236	-2.449	-1.342
SRP-dependent cotranslational protein targeting to membrane	N/A	-2.449	-2.646
Pulmonary Fibrosis Idiopathic Signaling Pathway	-1.633	-1.342	-2
Response of EIF2AK4 (GCN2) to amino acid deficiency	N/A	-2.236	-2.646
Class I MHC mediated antigen processing and presentation	-2	N/A	-2.828
Nonsense-Mediated Decay (NMD)	N/A	-2.236	-2.449
Eukaryotic Translation Termination	N/A	-2.236	-2.449
Hepatic Fibrosis Signaling Pathway	-2.449	-2.236	N/A
Eukaryotic Translation Elongation	N/A	-2.236	-2.449
Major pathway of rRNA processing in the nucleolus and cytosol	N/A	-2.236	-2.449
Mitotic Metaphase and Anaphase	-2	N/A	-2.646
Sertoli Cell-Sertoli Cell Junction Signaling	-2.236	-2.236	N/A
Oxytocin Signaling Pathway	-2.236	-2.236	N/A
Serotonin Receptor Signaling	-2.236	-2.236	N/A
Actin Cytoskeleton Signaling	-2	-2.449	N/A
Integrin Signaling	-2.236	-2	N/A
Cardiac Hypertrophy Signaling	-2.236	-2	N/A
Estrogen Receptor Signaling	-2	-2	N/A
Wound Healing Signaling Pathway	-2	-2	N/A
Paxillin Signaling	-2	-2	N/A
IL-17 Signaling	-2	-2	N/A
Cachexia Signaling Pathway	-2	N/A	-1.89
Chaperone Mediated Autophagy Signaling Pathway	-1	-1.342	0.816
Gap Junction Signaling	-1.342	-1.633	N/A
C-type lectin receptors (CLRs)	N/A	N/A	-2.828
Mitotic G2-G2/M phases	N/A	N/A	-2.828
Cell Cycle Checkpoints	N/A	N/A	-2.828
Deubiquitination	N/A	N/A	-2.828
Signaling by ROBO receptors	N/A	N/A	-2.646
TCF dependent signaling in response to WNT	N/A	N/A	-2.646
ABC-family proteins mediated transport	N/A	N/A	-2.646
Fc epsilon receptor (FCERI) signaling	N/A	N/A	-2.646
RAF/MAP kinase cascade	N/A	N/A	-2.646
Neddylation	N/A	N/A	-2.646
Cardiac Hypertrophy Signaling (Enhanced)	-2.646	N/A	N/A
NIK-->noncanonical NF-kB signaling	N/A	N/A	-2.646
Signaling by the B Cell Receptor (BCR)	N/A	N/A	-2.646
TNFR2 non-canonical NF-kB pathway	N/A	N/A	-2.449
DNA Replication Pre-Initiation	N/A	N/A	-2.449
Transcriptional regulation by RUNX1	N/A	N/A	-2.449
Regulation of RUNX2 expression and activity	N/A	N/A	-2.449
Eicosanoid Signaling	-2.449	N/A	N/A
PTEN Regulation	N/A	N/A	-2.449
Regulation of Apoptosis	N/A	N/A	-2.449
S Phase	N/A	N/A	-2.449
TCR signaling	N/A	N/A	-2.449
KEAP1-NFE2L2 pathway	N/A	N/A	-2.449
Synthesis of DNA	N/A	N/A	-2.449
Microautophagy Signaling Pathway	N/A	N/A	-2.449
Mitotic G1 phase and G1/S transition	N/A	N/A	-2.449
Metabolism of polyamines	N/A	N/A	-2.449
Cellular response to hypoxia	N/A	N/A	-2.449
Hedgehog 'off' state	N/A	N/A	-2.449
Regulation of mitotic cell cycle	N/A	N/A	-2.449
Interleukin-1 family signaling	N/A	N/A	-2.449
Signaling by NOTCH4	N/A	N/A	-2.449
Transcriptional regulation by RUNX3	N/A	N/A	-2.449
Hedgehog 'on' state	N/A	N/A	-2.449
Hedgehog ligand biogenesis	N/A	N/A	-2.449
Degradation of beta-catenin by the destruction complex	N/A	N/A	-2.449
Dendritic Cell Maturation	-2.236	N/A	N/A
L1CAM interactions	N/A	-2.236	N/A
IL-4 Signaling	-2.236	N/A	N/A
ILK Signaling	N/A	-2.236	N/A
Signaling by Rho Family GTPases	N/A	-2.236	N/A
Autism Signaling Pathway	N/A	-2.236	N/A
Leukocyte Extravasation Signaling	N/A	-2.236	N/A
Role of Osteoclasts in Rheumatoid Arthritis Signaling Pathway	-2.236	N/A	N/A
Mitotic Prometaphase	-2	N/A	N/A
CXCR4 Signaling	N/A	-2	N/A
IL-6 Signaling	-2	N/A	N/A
IL-17A Signaling in Fibroblasts	-2	N/A	N/A
Role of MAPK Signaling in Promoting the Pathogenesis of Influenza	N/A	-2	N/A
ESR-mediated signaling	N/A	-2	N/A
MSP-RON Signaling in Cancer Cells Pathway	N/A	-2	N/A
Agrin Interactions at Neuromuscular Junction	N/A	-2	N/A
Endothelin-1 Signaling	-2	N/A	N/A
Chronic Myeloid Leukemia Signaling	-2	N/A	N/A
PI3K/AKT Signaling	N/A	-2	N/A
Smooth Muscle Contraction	N/A	-2	N/A
Oxidative Stress Induced Senescence	N/A	-2	N/A
PAK Signaling	N/A	-2	N/A
MHC class II antigen presentation	-2	N/A	N/A
14-3-3-mediated Signaling	N/A	-2	N/A
Thrombin Signaling	-2	N/A	N/A
p70S6K Signaling	-2	N/A	N/A
HIF1α Signaling	-2	N/A	N/A
Mitotic Prophase	N/A	-2	N/A
Apelin Cardiomyocyte Signaling Pathway	-2	N/A	N/A
Gα12/13 Signaling	N/A	-2	N/A
Adrenomedullin signaling pathway	-2	N/A	N/A
Role of NFAT in Cardiac Hypertrophy	-2	N/A	N/A
Pathogen Induced Cytokine Storm Signaling Pathway	-2	N/A	N/A
Activin Inhibin Signaling Pathway	-2	N/A	N/A
Intra-Golgi and retrograde Golgi-to-ER traffic	-2	N/A	N/A
RAR Activation	-1.89	N/A	N/A
Neutrophil Extracellular Trap Signaling Pathway	-0.447	N/A	-1.342
IL-12 Signaling and Production in Macrophages	-1.342	N/A	N/A
CLEAR Signaling Pathway	0	1.342	N/A
PPARα/RXRα Activation	1	N/A	N/A
Xenobiotic Metabolism CAR Signaling Pathway	N/A	-1	N/A
CDK5 Signaling	N/A	1	N/A
Xenobiotic Metabolism PXR Signaling Pathway	N/A	-1	0
ABRA Signaling Pathway	N/A	-1	N/A
Tumor Microenvironment Pathway	N/A	N/A	-1
Sertoli Cell-Germ Cell Junction Signaling Pathway (Enhanced)	N/A	-1	N/A
Natural Killer Cell Signaling	-0.447	N/A	N/A
MicroRNA Biogenesis Signaling Pathway	0.447	0	N/A
Xenobiotic Metabolism General Signaling Pathway	N/A	N/A	-0.447

## Sheet: Table_S4_IPA_Dissease_Bio_Funct
© 2000-2024 QIAGEN. All rights reserved.	HpH/DIA-H	GPF/STW-H	DirectDIA
Diseases and Bio Functions (-Log2 p-value)	BESD_IGT_vs_NGT_HPH_MUSCLE_2 - 2024-01-05 12:35 PM	BESD_IGT_vs_NGT_GPF_MUSCLE_2 - 2024-01-05 12:28 PM	BESD_IGT_vs_NGT_DirectDIA_MUSCLE_2 - 2024-01-05 12:37 PM
Differentiation of embryonic stem cells	2.2555	2.24407	0
Quantity of caveolae	1.95566	1.94426	0
Formation of cytoplasmic aggregates	1.95566	1.94426	0
Chemotaxis of granulocytes	1.78076	1.76939	0
Pathological denervation of motor endplates	0	2.24407	0
Accumulation of synaptic vesicles	0	2.24407	0
Density of neuromuscular junctions	0	0	2.15743
Synaptic transmission of intercellular junctions	0	1.94426	0
Strength of soleus muscle	0	1.94426	0
Strength of extensor digitorum longus muscle	0	1.94426	0
Lean body mass	1.78076	0	0
Abnormal morphology of triad junctions	0	1.76939	0
Neurotransmission of neuromuscular junctions	0	1.76939	0
Quantity of satellite cells	0	1.76939	0
Abnormal morphology of anterior tibial muscle	0	0	1.6833
Tubulo-interstitial fibrosis of skeletal muscle	0	0	1.6833
Quantity of lipid droplets	1.65701	0	0
Quantity of glycogen	0	1.6423	0
Cell movement of leukocytes	1.60621	0	0
Formation of muscle	0	1.57404	0
Abnormal morphology of skeletal muscle fibers	0	1.56681	0
Quantity of Ca2+	0	1.54999	0
Formation of myofiber	0	1.54999	0
Cell differentiation of skeletal muscle	1.41753	0	0
Abnormal morphology of muscle	0	1.41115	0
Morphology of muscle cells	0	1.38663	0
Emigration of leukocytes	1.31076	0	0
Mass of extensor digitorum longus muscle	1.31076	0	0

## Sheet: Table_S5_IPA_Molecules
© 2000-2024 QIAGEN. All rights reserved.					HpH/DIA-H		GPF/STW-H		DirectDIA
Symbol	Entrez Gene Name	UniProt/Swiss-Prot Accession	UniProt/Swiss-Prot Accession	RefSeq/UniProt/Swiss-Prot Accession	Expr Log Ratio	Expr p-value	Expr Log Ratio	Expr p-value	Expr Log Ratio	Expr p-value	Location	Type(s)	Biomarker Application(s)	Drug(s)	Entrez Gene ID for Human	Entrez Gene ID for Mouse	Entrez Gene ID for Rat
A1BG	alpha-1-B glycoprotein	P04217	P04217	P04217	0.238	0.0447	0.18	0.0992	-0.212	0.00179	Extracellular Space	other	unspecified application		1	117586	140656
A2M	alpha-2-macroglobulin	P01023	P01023	P01023	0.518	0.00572	0.528	0.0037	-0.045	0.157	Extracellular Space	transporter			2	232345	24153
AAMDC	adipogenesis associated Mth938 domain containing	Q9H7C9	Q9H7C9	Q9H7C9	-0.12	0.0333	-0.146	0.00827	0.252	9.36e-07	Cytoplasm	other			28971	66273	361606
AARS1	alanyl-tRNA synthetase 1	P49588			-0.474	6.14e-07					Cytoplasm	enzyme			16	234734	292023
AASDHPPT	aminoadipate-semialdehyde dehydrogenase-phosphopantetheinyl transferase	Q9NRN7			0.095	0.237					Cytoplasm	enzyme			60496	67618	300328
ABCF1	ATP binding cassette subfamily F member 1	Q8NE71	Q8NE71		-0.263	0.00087	-0.053	0.0907			Cytoplasm	transporter			23	224742	85493
ABHD10	abhydrolase domain containing 10, depalmitoylase	Q9NUJ1	Q9NUJ1		-0.304	0.109	-0.786	1.57e-15			Cytoplasm	enzyme			55347	213012	303953
ABHD11	abhydrolase domain containing 11	Q8NFV4			0.055	0.235					Cytoplasm	enzyme			83451	68758	360831
ABHD14B	abhydrolase domain containing 14B	Q96IU4	Q96IU4	Q96IU4	-0.098	0.000133	-0.253	1.37e-05	-0.364	0.0184	Cytoplasm	enzyme			84836	76491	300983
ABLIM2	actin binding LIM protein family member 2	Q6H8Q1	Q6H8Q1		0	0.297	-0.086	0.312			Cytoplasm	other			84448	231148	360958
ACAA1	acetyl-CoA acyltransferase 1	P09110	P09110	P09110	-0.014	0.227	-0.119	0.135	-0.624	1.15e-12	Cytoplasm	enzyme	unspecified application	trimetazidine	30	113868	24157|501072
ACAA2	acetyl-CoA acyltransferase 2	P42765	P42765	P42765	-0.059	0.0763	0.005	0.32	0.221	0.0105	Cytoplasm	enzyme	unspecified application		10449	52538	170465
ACAD8	acyl-CoA dehydrogenase family member 8	Q9UKU7	Q9UKU7		-0.15	0.165	-0.463	0.00102			Cytoplasm	enzyme			27034	66948	367196
ACADM	acyl-CoA dehydrogenase medium chain	P11310	P11310	P11310	-0.057	0.125	-0.052	0.087	0.137	0.0616	Cytoplasm	enzyme	unspecified application		34	11364	24158
ACADS	acyl-CoA dehydrogenase short chain	P16219	P16219	P16219	0.377	0.000119	0.301	0.000938	0.387	0.000209	Cytoplasm	enzyme	unspecified application		35	11409	64304
ACADSB	acyl-CoA dehydrogenase short/branched chain	P45954	P45954	P45954	-0.417	0.00125	-0.655	2.8e-11	-0.563	1.39e-05	Cytoplasm	enzyme			36	66885	25618
ACADVL	acyl-CoA dehydrogenase very long chain	P49748	P49748	P49748	-0.064	0.0993	-0.044	0.185	0.133	0.0126	Cytoplasm	enzyme	unspecified application		37	11370	25363
ACAT1	acetyl-CoA acetyltransferase 1	P24752	P24752	P24752	0.123	0.00186	0.116	0.00316	0.137	0.00883	Cytoplasm	enzyme	unspecified application		38	110446	25014
ACLY	ATP citrate lyase	P53396			0.272	0.0903					Cytoplasm	enzyme	unspecified application	bempedoic acid,bempedoic acid/ezetimibe,bempedoyl-CoA	47	104112	24159
ACO1	aconitase 1	P21399	P21399	P21399	0.043	0.116	0.05	0.345	-0.243	3.52e-05	Cytoplasm	enzyme			48	11428	50655
ACO2	aconitase 2	Q99798	Q99798	Q99798	-0.032	0.233	-0.034	0.211	-0.065	0.0764	Cytoplasm	enzyme			50	11429	79250
ACOT1	acyl-CoA thioesterase 1	Q86TX2	Q86TX2	Q86TX2	-0.015	0.317	0.067	0.129	-0.028	0.257	Cytoplasm	enzyme			641371	171281	314304
ACOT9	acyl-CoA thioesterase 9	Q9Y305	Q9Y305	Q9Y305	-0.175	0.0621	-0.101	0.132	-0.103	0.0669	Cytoplasm	enzyme			23597	56360|64833	302640
ACOT13	acyl-CoA thioesterase 13	Q9NPJ3	Q9NPJ3	Q9NPJ3	0.012	0.281	-0.018	0.096	-0.049	0.269	Cytoplasm	enzyme			55856	66834	291135
ACP1	acid phosphatase 1	P24666	P24666	P24666	0.081	0.194	0.144	0.0394	-0.19	0.00242	Cytoplasm	phosphatase			52	11431	302513
ACSF2	acyl-CoA synthetase family member 2	Q96CM8	Q96CM8	Q96CM8	-0.295	1.28e-05	-0.053	0.00329	-0.718	2.94e-07	Cytoplasm	enzyme			80221	264895	619561
ACSL1	acyl-CoA synthetase long chain family member 1	P33121	P33121	P33121	0.092	0.0469	0.069	0.0927	0.037	0.23	Cytoplasm	enzyme	unspecified application		2180	14081	25288
ACSL3	acyl-CoA synthetase long chain family member 3	O95573	O95573		0.194	0.038	0.043	0.0791			Cytoplasm	enzyme			2181	74205	114024
ACSS1	acyl-CoA synthetase short chain family member 1	Q9NUB1	Q9NUB1	Q9NUB1	0.007	0.242	-0.336	0.000524	-1.116	1.48e-13	Cytoplasm	enzyme			84532	68738	296259
ACTA1	actin alpha 1, skeletal muscle	P68133	P68133	P68133	-0.086	0.0604	-0.064	0.126	-0.051	0.0929	Cytoplasm	other			58	11459	29437
ACTA2	actin alpha 2, smooth muscle	P62736	P62736	P62736	-0.494	1.57e-06	-0.872	4.51e-05	-0.093	0.258	Cytoplasm	other	efficacy		59	11475	81633
ACTB	actin beta	P60709	P60709	P60709	-0.215	2.33e-05	-0.154	0.0108	0.092	0.168	Cytoplasm	other			60	11461	81822
ACTBL2	actin beta like 2			Q562R1					-2.392	1.18e-08	Nucleus	other			345651	238880	294732
ACTN1	actinin alpha 1	P12814		P12814	-0.644	1.16e-05			-0.218	2.9e-06	Nucleus	transcription regulator			87	109711	81634
ACTN2	actinin alpha 2	P35609	P35609	P35609	-0.054	0.0351	-0.042	0.0579	-0.07	0.00104	Nucleus	transcription regulator	unspecified application		88	11472	291245
ACTN3	actinin alpha 3	Q08043	Q08043	Q08043	0.849	7.78e-06	0.841	7.45e-06	1.229	5.28e-07	Plasma Membrane	other	unspecified application		89
ACTN4	actinin alpha 4	O43707	O43707	O43707	-0.035	0.0317	-0.083	0.0327	-0.19	0.065	Cytoplasm	transcription regulator			81	60595	63836
ACTR2	actin related protein 2		P61160				-0.143	0.209			Plasma Membrane	other			10097	66713	289820
ACTR1A	actin related protein 1A	P61163	P61163	P61163	-0.03	0.179	-0.198	8.13e-05	-0.076	0.145	Cytoplasm	other			10121	54130	294010
ACY1	aminoacylase 1	Q03154	Q03154		0.096	0.141	-0.08	0.07			Cytoplasm	peptidase	unspecified application		95	109652	300981
ACYP2	acylphosphatase 2	P14621	P14621	P14621	0.084	0.0148	0.054	0.047	0.001	0.33	Cytoplasm	enzyme			98	75572	364224
ADH5	alcohol dehydrogenase 5 (class III), chi polypeptide	P11766	P11766	P11766	-0.108	0.00348	-0.106	0.0336	-0.062	0.0476	Cytoplasm	enzyme		N6022	128	11532	100145871
ADH1A	alcohol dehydrogenase 1A (class I), alpha polypeptide			P07327					-1.049	4.72e-06	Cytoplasm	enzyme		fomepizole	124
ADH1B	alcohol dehydrogenase 1B (class I), beta polypeptide	P00325	P00325	P00325	-0.028	0.257	-0.337	0.0197	-1.049	4.72e-06	Cytoplasm	enzyme		fomepizole	125
ADHFE1	alcohol dehydrogenase iron containing 1	Q8IWW8	Q8IWW8	Q8IWW8	-0.339	0.00257	-0.24	0.00574	-0.033	0.257	Cytoplasm	enzyme			137872	76187	362474
ADI1	acireductone dioxygenase 1	Q9BV57			-0.53	0.0477					Nucleus	enzyme			55256	104923	298934
ADPRHL1	ADP-ribosylhydrolase like 1	Q8NDY3	Q8NDY3	Q8NDY3	0.037	0.345	0.02	0.346	-0.256	3.58e-05	Other	enzyme			113622	234072	290880
ADPRS	ADP-ribosylserine hydrolase	Q9NX46			-0.637	4.67e-06					Cytoplasm	enzyme			54936	100206	362600
ADSL	adenylosuccinate lyase	P30566	P30566	P30566	-0.044	0.193	-0.04	0.122	-0.106	0.00622	Cytoplasm	enzyme			158	11564	315150
ADSS1	adenylosuccinate synthase 1	Q8N142	Q8N142	Q8N142	-0.008	0.332	0.02	0.149	-0.205	5.46e-09	Cytoplasm	enzyme			122622	11565	684425
AFG3L2	AFG3 like matrix AAA peptidase subunit 2	Q9Y4W6	Q9Y4W6	Q9Y4W6	-0.04	0.106	0.022	0.348	-0.073	0.218	Cytoplasm	peptidase			10939	69597	307350
AFM	afamin	P43652	P43652		0.184	0.0996	0.382	0.011			Extracellular Space	transporter	unspecified application		173	280662	282708
AGL	amylo-alpha-1, 6-glucosidase, 4-alpha-glucanotransferase	P35573	P35573	P35573	0.099	0.00727	0.102	0.00719	-0.095	0.00126	Cytoplasm	enzyme			178	77559	362029
AGMAT	agmatinase	Q9BSE5			-0.109	0.268					Cytoplasm	enzyme			79814	75986	298607
AGO2	argonaute RISC catalytic component 2		Q9UKV8				0.118	0.0443			Cytoplasm	translation regulator			27161	239528	59117
AGO3	argonaute RISC catalytic component 3		Q9H9G7				0.118	0.0443			Cytoplasm	translation regulator			192669	214150	313593
AGT	angiotensinogen	P01019	P01019	P01019	-0.123	0.0496	0.175	0.0366	-0.469	0.000165	Extracellular Space	growth factor	efficacy	amlodipine/telmisartan,azilsartan,hydrochlorothiazide/telmisartan,telmisartan	183	11606	24179
AHCY	adenosylhomocysteinase	P23526	P23526	P23526	-0.073	0.136	-0.163	0.00218	-0.36	9.57e-07	Cytoplasm	enzyme	unspecified application	3-deazaaristeromycin,3-deazaneplanocin,6'-C-methylneplanocin A,9-(2',3'-dihydroxycyclopent-4'-enyl)adenine,cyanovirin-N,neplanocin A	191	269378	29443
AHNAK	AHNAK nucleoprotein	Q09666	Q09666	Q09666	-0.281	3.76e-05	-0.291	4.91e-05	0.084	0.227	Nucleus	other			79026	66395	191572
AHSA1	activator of HSP90 ATPase activity 1	O95433			-0.417	0.045					Cytoplasm	other			10598	217737	681996
AHSG	alpha 2-HS glycoprotein	P02765	P02765	P02765	0.04	0.294	0.101	0.12	-0.37	9.24e-05	Extracellular Space	other	unspecified application		197	11625	25373
AHSP	alpha hemoglobin stabilizing protein	Q9NZD4	Q9NZD4	Q9NZD4	-0.184	0.215	-0.266	0.0896	-0.955	1.22e-05	Cytoplasm	other			51327		293522
AIFM1	apoptosis inducing factor mitochondria associated 1	O95831	O95831	O95831	0.048	0.102	0.029	0.138	0.138	0.0268	Cytoplasm	enzyme			9131	26926	83533
AIMP1	aminoacyl tRNA synthetase complex interacting multifunctional protein 1	Q12904			0.126	0.2					Extracellular Space	cytokine	diagnosis		9255	13722	114632
AIMP2	aminoacyl tRNA synthetase complex interacting multifunctional protein 2	Q13155	Q13155		-0.378	1.47e-05	-0.125	0.0222			Plasma Membrane	other			7965	231872	288480
AK1	adenylate kinase 1	P00568	P00568	P00568	-0.046	0.174	-0.039	0.217	-0.221	2.99e-06	Cytoplasm	kinase	unspecified application		203	11636	24183
AK2	adenylate kinase 2	P54819	P54819	P54819	0.051	0.128	0.153	0.0224	0.108	0.113	Cytoplasm	kinase			204	11637	24184
AK3	adenylate kinase 3	Q9UIJ7	Q9UIJ7	Q9UIJ7	-0.474	3.65e-05	-0.397	0.000163	-0.45	0.00157	Cytoplasm	kinase			50808	56248	26956
AKR1A1	aldo-keto reductase family 1 member A1	P14550	P14550		0.025	0.137	-0.027	0.149			Cytoplasm	enzyme		aldose reductase inhibitor	10327	58810	78959
AKR1B1	aldo-keto reductase family 1 member B	P15121	P15121	P15121	-0.189	4.66e-12	-0.193	3.72e-12	-0.162	1.34e-10	Cytoplasm	enzyme		sorbinil	231	11677	24192
AKR1C3	aldo-keto reductase family 1 member C3	P42330	P42330	P42330	-1.105	0.00174	-0.331	0.17	0.307	0.18	Cytoplasm	enzyme		ASP9521	8644	105349	171516
AKR1C1/AKR1C2	aldo-keto reductase family 1 member C2	P52895	P52895	P52895	-0.672	0.00403	-0.564	0.0134	-0.282	0.0687	Cytoplasm	enzyme			1645|1646	77337	291283
AKR7A2	aldo-keto reductase family 7 member A2	O43488	O43488	O43488	-0.025	0.207	0.001	0.184	-0.586	9.93e-12	Cytoplasm	enzyme	diagnosis		8574	110198	171445
ALAD	aminolevulinate dehydratase	P13716	P13716	P13716	-0.125	0.172	0.1	0.25	-0.855	8.87e-10	Cytoplasm	enzyme		delta-aminolevulinic acid	210	17025	25374
ALB	albumin	P02768	P02768	P02768	0.177	0.00119	0.169	0.00154	0.154	0.00536	Extracellular Space	transporter	diagnosis,efficacy,prognosis,safety,unspecified application	aldoxorubicin,gadofosveset trisodium,GSK3128349,HPN328,NM21-1480,platinum	213	11657	24186
ALDH2	aldehyde dehydrogenase 2 family member	P05091	P05091	P05091	-0.153	0.0379	-0.205	0.021	0.073	0.23	Cytoplasm	enzyme	unspecified application	ANS-6637,chlorpropamide,disulfiram,disulfiram/gemcitabine	217	11669	29539
ALDH1A1	aldehyde dehydrogenase 1 family member A1	P00352	P00352	P00352	0.072	0.101	0.071	0.107	-0.104	0.0743	Cytoplasm	enzyme	diagnosis,disease progression	chlorpropamide,disulfiram	216	11668	24188
ALDH1B1	aldehyde dehydrogenase 1 family member B1	P30837	P30837	P30837	-0.31	0.0167	-0.385	0.00849	-0.363	0.0224	Cytoplasm	enzyme			219	72535	298079
ALDH1L1	aldehyde dehydrogenase 1 family member L1	O75891	O75891	O75891	-0.114	0.0317	-0.202	0.00157	-0.575	2.95e-18	Cytoplasm	enzyme			10840	107747	64392
ALDH3A2	aldehyde dehydrogenase 3 family member A2	P51648	P51648	P51648	-0.584	0.000329	-0.758	1.22e-05	0.009	0.0578	Cytoplasm	enzyme			224	11671	65183
ALDH4A1	aldehyde dehydrogenase 4 family member A1	P30038	P30038	P30038	-0.084	0.038	-0.079	0.0268	0.139	0.0214	Cytoplasm	enzyme			8659	212647	641316
ALDH5A1	aldehyde dehydrogenase 5 family member A1	P51649	P51649	P51649	0.003	0.338	-0.025	0.115	-0.06	0.126	Cytoplasm	enzyme		theophylline/tretinoin/valproic acid,valproic acid	7915	214579	291133
ALDH6A1	aldehyde dehydrogenase 6 family member A1	Q02252	Q02252		-0.247	0.0223	-0.054	0.24			Cytoplasm	enzyme	unspecified application		4329	104776	81708
ALDH7A1	aldehyde dehydrogenase 7 family member A1	P49419	P49419		-0.075	0.348	-0.591	0.00414			Cytoplasm	enzyme			501	110695	291450
ALDH9A1	aldehyde dehydrogenase 9 family member A1	P49189	P49189	P49189	-0.11	0.00218	-0.093	0.00511	-0.088	0.00519	Cytoplasm	enzyme			223	56752	64040
ALDOA	aldolase, fructose-bisphosphate A	P04075	P04075	P04075	0	0.361	-0.004	0.36	0.027	0.25	Cytoplasm	enzyme	unspecified application		226	11674	24189
ALDOC	aldolase, fructose-bisphosphate C	P09972	P09972	P09972	-0.076	0.163	-0.058	0.194	-0.416	1.79e-06	Cytoplasm	enzyme	unspecified application		230	11676	24191
AMBP	alpha-1-microglobulin/bikunin precursor	P02760	P02760		-0.023	0.161	0.4	0.00367			Extracellular Space	transporter	safety,unspecified application		259	11699	25377
AMPD1	adenosine monophosphate deaminase 1	P23109	P23109	P23109	0.333	0.000713	0.319	0.000856	0.605	4.95e-09	Cytoplasm	enzyme			270	229665	25028
ANK1	ankyrin 1	P16157	P16157	P16157	0.044	0.345	-0.003	0.348	-0.583	0.00121	Plasma Membrane	other			286	11733	306570
ANK2	ankyrin 2	Q01484			-0.648	3.07e-06					Plasma Membrane	other			287		362036
ANK3	ankyrin 3	Q12955	Q12955		-0.195	0.0942	-0.921	1.37e-05			Plasma Membrane	other			288	11735	361833
ANKRD1	ankyrin repeat domain 1			Q15327					-0.049	0.0983	Cytoplasm	transcription regulator			27063	107765	27064
ANKRD2	ankyrin repeat domain 2	Q9GZV1	Q9GZV1	Q9GZV1	0.046	0.279	0.05	0.251	0.112	0.128	Nucleus	transcription regulator	unspecified application		26287	56642	309374
ANXA1	annexin A1	P04083	P04083	P04083	-0.931	0.000229	-0.716	0.000747	0.119	0.333	Plasma Membrane	enzyme	diagnosis,prognosis,unspecified application	acyclovir/hydrocortisone,cytarabine/hydrocortisone/methotrexate,dasatinib/hydrocortisone,hydrocortisone,hydrocortisone/imatinib,hydrocortisone/mitoxantrone,hydrocortisone/prednisone	301	16952	25380
ANXA2	annexin A2	P07355	P07355	P07355	-0.303	0.00201	-0.279	0.00258	-0.005	0.328	Plasma Membrane	other	diagnosis,unspecified application		302	12306	56611
ANXA3	annexin A3		P12429				-0.09	0.091			Cytoplasm	enzyme	diagnosis,unspecified application		306	11745	25291
ANXA4	annexin A4	P09525	P09525		-0.452	4.65e-05	-0.169	5.64e-06			Plasma Membrane	other			307	11746	79124
ANXA5	annexin A5	P08758	P08758	P08758	-0.279	6.36e-06	-0.294	2.13e-06	-0.005	0.305	Plasma Membrane	transporter	diagnosis,efficacy		308	11747	25673
ANXA6	annexin A6	P08133	P08133	P08133	0.02	0.241	0.019	0.242	-0.045	0.049	Plasma Membrane	ion channel
ANXA7	annexin A7	P20073	P20073	P20073	0.042	0.292	-0.033	0.015	0.038	0.186	Plasma Membrane	ion channel
ANXA11	annexin A11	P50995	P50995	P50995	-0.109	0.00453	-0.249	2.91e-07	-0.122	1.91e-08	Nucleus	other			311	11744	290527
AOC3	amine oxidase copper containing 3	Q16853	Q16853	Q16853	-0.603	0.00631	-0.408	0.00946	0.196	0.287	Plasma Membrane	enzyme		ASP8232,hydralazine,hydralazine/hydrochlorothiazide,hydralazine/hydrochlorothiazide/reserpine,hydralazine/isosorbide dinitrate
AP2B1	adaptor related protein complex 2 subunit beta 1	P63010	P63010		-0.028	0.297	-0.498	1.64e-07			Plasma Membrane	transporter
AP2M1	adaptor related protein complex 2 subunit mu 1	Q96CW1			-0.265	0.0527					Cytoplasm	other
APCS	amyloid P component, serum		P02743				-0.513	4.73e-05			Extracellular Space	other	unspecified application	dezamizumab,miridesap
APEH	acylaminoacyl-peptide hydrolase	P13798	P13798	P13798	0.085	0.011	-0.11	0.0366	-0.198	2.25e-08	Cytoplasm	peptidase
APEX1	apurinic/apyrimidinic endodeoxyribonuclease 1	P27695	P27695		-0.737	1.12e-11	-0.508	3.83e-08			Nucleus	enzyme		E 3330,lucanthone
APIP	APAF1 interacting protein	Q96GX9			0.132	0.0733					Cytoplasm	enzyme
APOA1	apolipoprotein A1	P02647	P02647	P02647	0.235	0.00341	0.252	0.00218	0.063	0.226	Extracellular Space	transporter	diagnosis,efficacy,unspecified application	ISIS 681257
APOA2	apolipoprotein A2	P02652	P02652	P02652	0.11	0.1	0.095	0.184	-0.107	0.109	Extracellular Space	transporter	efficacy
APOA4	apolipoprotein A4	P06727	P06727	P06727	-0.146	0.151	-0.014	0.273	0.005	0.0486	Extracellular Space	transporter	unspecified application
APOB	apolipoprotein B	P04114	P04114	P04114	0.168	0.218	0.148	0.171	-0.621	2.59e-06	Extracellular Space	transporter	diagnosis,efficacy	mipomersen
APOBEC2	apolipoprotein B mRNA editing enzyme catalytic subunit 2	Q9Y235	Q9Y235	Q9Y235	-0.004	0.266	-0.02	0.309	0.087	0.00717	Other	enzyme
APOC1	apolipoprotein C1		P02654				0.726	0.000201			Extracellular Space	transporter	prognosis,unspecified application
APOC3	apolipoprotein C3	P02656		P02656	0.328	0.000851			0.122	0.171	Extracellular Space	transporter	diagnosis,efficacy	volanesorsen
APOD	apolipoprotein D	P05090	P05090	P05090	0.338	0.000347	-0.459	0.00115	-0.546	1.32e-06	Extracellular Space	transporter	safety
APOE	apolipoprotein E	P02649	P02649		0.627	0.0891	0.11	0.087			Extracellular Space	transporter	diagnosis,efficacy,prognosis,unspecified application
APOH	apolipoprotein H	P02749	P02749	P02749	0.091	0.189	0.071	0.217	-0.169	0.0691	Extracellular Space	transporter	unspecified application
APOO	apolipoprotein O	Q9BUR5	Q9BUR5	Q9BUR5	-0.308	1.94e-05	-0.175	0.0277	-0.291	0.00039	Extracellular Space	other
APOOL	apolipoprotein O like	Q6UXV4	Q6UXV4	Q6UXV4	-0.136	0.0237	-0.038	0.19	-0.03	0.208	Extracellular Space	other
APRT	adenine phosphoribosyltransferase	P07741	P07741		0.043	0.0991	-0.22	0.000604			Cytoplasm	enzyme
ARF1	ADP ribosylation factor 1	P84077		P84077	-0.158	5.52e-05			0.018	0.146	Cytoplasm	enzyme
ARF3	ADP ribosylation factor 3	P61204	P61204	P61204	-0.158	5.52e-05	-0.023	0.184	0.018	0.146	Cytoplasm	enzyme
ARF6	ADP ribosylation factor 6	P62330			0.068	0.234					Plasma Membrane	transporter
ARHGAP1	Rho GTPase activating protein 1	Q07960			-0.193	0.245					Cytoplasm	other
ARHGDIA	Rho GDP dissociation inhibitor alpha	P52565	P52565	P52565	-0.096	0.00542	-0.068	0.0825	-0.128	1.42e-09	Cytoplasm	other	unspecified application
ARL6IP5	ADP ribosylation factor like GTPase 6 interacting protein 5	O75915	O75915	O75915	-0.172	0.000472	-0.29	1.51e-08	0.005	0.247	Cytoplasm	other
ARL8B	ADP ribosylation factor like GTPase 8B	Q9NVJ2	Q9NVJ2		-0.574	1.75e-07	-0.089	0.0206			Plasma Membrane	enzyme
ARMT1	acidic residue methyltransferase 1	Q9H993	Q9H993		0.271	0.00837	0.491	0.0517			Other	enzyme
ARPC4	actin related protein 2/3 complex subunit 4	P59998			-0.381	0.000969					Cytoplasm	other
ARPC5L	actin related protein 2/3 complex subunit 5 like	Q9BPX5			-0.151	0.305					Cytoplasm	other
ART3	ADP-ribosyltransferase 3 (inactive)	Q13508	Q13508		-0.226	0.000347	-0.215	0.0411			Plasma Membrane	enzyme
ASPA	aspartoacylase		P45381				-0.011	0.064			Cytoplasm	enzyme
ASS1	argininosuccinate synthase 1		P00966				-0.494	1.35e-06			Cytoplasm	enzyme
ATAD1	ATPase family AAA domain containing 1	Q8NBU5	Q8NBU5		0.318	0.189	0.01	0.2			Plasma Membrane	enzyme
ATAD3A	ATPase family AAA domain containing 3A	Q9NVI7	Q9NVI7		0.161	0.281	-0.554	2.65e-12			Cytoplasm	other
ATIC	5-aminoimidazole-4-carboxamide ribonucleotide formyltransferase/IMP cyclohydrolase	P31939	P31939	P31939	-0.035	0.326	0.061	0.0213	0.098	0.00115	Cytoplasm	enzyme		gemcitabine/pemetrexed,pembrolizumab/pemetrexed,pemetrexed
ATL2	atlastin GTPase 2		Q8NHH9				-0.803	1.44e-06			Cytoplasm	other
ATP1A1	ATPase Na+/K+ transporting subunit alpha 1	P05023	P05023		0.394	0.196	-0.143	0.054			Plasma Membrane	transporter		acetyldigitoxin derivative,bretylium,ciclopirox olamine,digitoxin,digoxin,ethacrynic acid,ouabain,perphenazine,reserpine/trichloromethiazide,trichloromethiazide
ATP1A2	ATPase Na+/K+ transporting subunit alpha 2	P50993	P50993	P50993	-0.063	0.0791	-0.038	0.154	-0.06	0.108	Plasma Membrane	transporter		digoxin,ethacrynic acid,perphenazine
ATP1B1	ATPase Na+/K+ transporting subunit beta 1	P05026	P05026	P05026	-0.226	0.000181	-0.105	0.0276	-0.179	0.064	Plasma Membrane	transporter
ATP2A1	ATPase sarcoplasmic/endoplasmic reticulum Ca2+ transporting 1	O14983	O14983	O14983	-0.008	0.346	-0.007	0.342	-0.038	0.178	Cytoplasm	transporter	unspecified application
ATP2A2	ATPase sarcoplasmic/endoplasmic reticulum Ca2+ transporting 2	P16615	P16615	P16615	0.012	0.268	0.017	0.242	0.055	0.138	Cytoplasm	transporter
ATP2A3	ATPase sarcoplasmic/endoplasmic reticulum Ca2+ transporting 3			Q93084					0.145	0.313	Cytoplasm	transporter
ATP5F1A	ATP synthase F1 subunit alpha	P25705	P25705	P25705	-0.011	0.338	-0.007	0.334	-0.054	0.112	Cytoplasm	transporter
ATP5F1B	ATP synthase F1 subunit beta	P06576	P06576	P06576	-0.017	0.326	-0.032	0.208	-0.054	0.123	Cytoplasm	transporter
ATP5F1C	ATP synthase F1 subunit gamma	P36542	P36542	P36542	0.005	0.313	-0.024	0.259	-0.115	0.0252	Cytoplasm	transporter
ATP5F1D	ATP synthase F1 subunit delta	P30049	P30049	P30049	-0.046	0.127	-0.028	0.229	-0.519	2.12e-09	Cytoplasm	transporter
ATP5IF1	ATP synthase inhibitory factor subunit 1			Q9UII2					0.456	0.0729	Cytoplasm	other
ATP5ME	ATP synthase membrane subunit e	P56385	P56385	P56385	-0.097	0.0778	0.005	0.253	-0.271	4.59e-07	Cytoplasm	transporter
ATP5MF	ATP synthase membrane subunit f	P56134	P56134	P56134	-0.151	0.00227	0.063	0.14	-0.023	0.214	Cytoplasm	transporter
ATP5MG	ATP synthase membrane subunit g	O75964	O75964	O75964	-0.022	0.285	-0.038	0.207	-0.062	0.124	Cytoplasm	enzyme
ATP5MJ	ATP synthase membrane subunit j	P56378	P56378	P56378	-0.297	1.32e-05	-0.263	3.28e-05	-0.054	0.234	Cytoplasm	other
ATP5MK	ATP synthase membrane subunit k	Q96IX5	Q96IX5	Q96IX5	0.075	0.326	0.086	0.14	-0.25	3.1e-06	Cytoplasm	other
ATP5PB	ATP synthase peripheral stalk-membrane subunit b	P24539	P24539	P24539	-0.039	0.198	-0.06	0.162	-0.131	0.0194	Cytoplasm	transporter
ATP5PD	ATP synthase peripheral stalk subunit d	O75947	O75947	O75947	-0.009	0.346	-0.032	0.226	-0.053	0.0914	Cytoplasm	enzyme
ATP5PF	ATP synthase peripheral stalk subunit F6	P18859	P18859	P18859	0.023	0.0932	-0.14	0.000743	-0.211	0.00031	Cytoplasm	transporter
ATP5PO	ATP synthase peripheral stalk subunit OSCP	P48047	P48047	P48047	-0.031	0.271	-0.032	0.261	-0.077	0.118	Cytoplasm	transporter
ATP6V1A	ATPase H+ transporting V1 subunit A	P38606	P38606		-0.09	0.194	-0.212	0.00762			Plasma Membrane	transporter		bafilomycin A1,bafilomycin b1
ATP6V1B2	ATPase H+ transporting V1 subunit B2	P21281	P21281		-0.35	7.85e-05	-1.115	2.87e-07			Cytoplasm	transporter	unspecified application	gallium nitrate
ATP6V1E1	ATPase H+ transporting V1 subunit E1	P36543			0.051	0.00788					Cytoplasm	transporter
ATPAF1	ATP synthase mitochondrial F1 complex assembly factor 1	Q5TC12			-0.071	0.00739					Cytoplasm	other
ATXN10	ataxin 10	Q9UBB4			0.088	0.1					Cytoplasm	other
AUH	AU RNA binding methylglutaconyl-CoA hydratase	Q13825			-0.228	0.045					Cytoplasm	enzyme
AZGP1	alpha-2-glycoprotein 1, zinc-binding	P25311	P25311	P25311	-0.179	0.015	-0.142	0.0342	0.028	0.194	Extracellular Space	transporter	unspecified application
B2M	beta-2-microglobulin	P61769		P61769	-0.017	0.194			-0.337	0.000642	Plasma Membrane	transmembrane receptor	disease progression,efficacy,safety,unspecified application	4'-iodo-4'-deoxydoxorubicin
BAG3	BAG cochaperone 3	O95817	O95817	O95817	-0.033	0.113	-0.026	0.252	-0.159	0.000166	Cytoplasm	other
BANF1	BAF nuclear assembly factor 1	O75531	O75531	O75531	-0.265	4.55e-09	-0.187	3.19e-06	-0.081	0.158	Nucleus	other
BCAT2	branched chain amino acid transaminase 2	O15382	O15382	O15382	-0.315	0.00764	-0.952	3.58e-15	-0.767	1.77e-11	Cytoplasm	enzyme
BCL2L13	BCL2 like 13	Q9BXK5	Q9BXK5	Q9BXK5	-0.063	0.00586	-0.134	0.00208	-0.431	4.62e-16	Cytoplasm	other
BDH1	3-hydroxybutyrate dehydrogenase 1	Q02338	Q02338		-0.547	7.19e-07	-0.371	0.000461			Cytoplasm	enzyme
BIN1	bridging integrator 1	O00499	O00499	O00499	-0.098	0.000295	-0.067	0.00482	0.013	0.128	Nucleus	other
BLVRA	biliverdin reductase A	P53004	P53004	P53004	0.124	0.142	-0.205	0.0021	-0.291	7.38e-06	Cytoplasm	enzyme
BLVRB	biliverdin reductase B	P30043	P30043	P30043	-0.046	0.289	-0.021	0.329	-0.149	0.0294	Cytoplasm	enzyme
BPGM	bisphosphoglycerate mutase	P07738	P07738	P07738	0.088	0.348	-0.326	0.00302	-1.185	2.57e-13	Extracellular Space	phosphatase
BROX	BRO1 domain and CAAX motif containing	Q5VW32	Q5VW32		0.055	0.281	-0.169	0.0275			Cytoplasm	other
BSG	basigin (Ok blood group)	P35613	P35613	P35613	-0.193	0.00317	-0.338	0.000162	-0.142	0.00451	Plasma Membrane	transporter	disease progression,prognosis,response to therapy	metuximab
BTF3	basic transcription factor 3	P20290	P20290		-0.078	0.163	-0.101	0.0402			Nucleus	transcription regulator
BTF3L4	basic transcription factor 3 like 4		Q96K17				0.344	0.0394			Other	other
BZW2	basic leucine zipper and W2 domains 2	Q9Y6E2	Q9Y6E2	Q9Y6E2	-0.097	0.0159	-0.107	0.00259	-0.195	9.63e-06	Cytoplasm	translation regulator
C3	complement C3	P01024	P01024	P01024	0.438	0.000125	0.441	0.000125	0.059	0.275	Extracellular Space	peptidase	efficacy	efdamrofusp alfa,IgG,pegcetacoplan
C11orf54	chromosome 11 open reading frame 54	Q9H0W9	Q9H0W9	Q9H0W9	-0.04	0.188	-0.035	0.33	0.103	0.115	Nucleus	enzyme
C1QBP	complement C1q binding protein	Q07021	Q07021	Q07021	0.071	0.357	-0.107	0.000775	-0.182	0.018	Cytoplasm	transcription regulator
C1QC	complement C1q C chain	P02747			0.279	0.149					Extracellular Space	other
C4A/C4B	complement C4A (Rodgers blood group)	P0C0L4	P0C0L4	P0C0L4	0.676	1.85e-05	0.708	8.07e-05	0.1	0.18	Extracellular Space	other	unspecified application	efdamrofusp alfa,IgG
C4BPA	complement component 4 binding protein alpha	P04003	P04003		0.114	0.191	0.261	0.216			Extracellular Space	other
C6orf136	chromosome 6 open reading frame 136	Q5SQH8			-0.008	0.22					Cytoplasm	other
CA1	carbonic anhydrase 1	P00915	P00915	P00915	0.215	0.0956	0.214	0.104	-0.267	0.0394	Cytoplasm	enzyme		acetazolamide,benzthiazide,brimonidine/brinzolamide,brinzolamide,chlorothiazide,chlorothiazide/reserpine,chlorthalidone,diazoxide,dichlorphenamide,dorzolamide,dorzolamide/timolol,ethoxyzolamide,hydrochlorothiazide,methazolamide,quinethazone,sulfacetamide,topiramate,trichloromethiazide
CA2	carbonic anhydrase 2	P00918	P00918	P00918	0.117	0.105	0.095	0.125	-0.219	0.00338	Cytoplasm	enzyme	diagnosis,unspecified application	acetazolamide,benzthiazide,brimonidine/brinzolamide,brinzolamide,chlorothiazide,chlorothiazide/reserpine,chlorthalidone,diazoxide,dichlorphenamide,dorzolamide,dorzolamide/timolol,ethoxyzolamide,hydrochlorothiazide,methazolamide,phentermine/topiramate,quinethazone,sulfacetamide,topiramate,trichloromethiazide
CA3	carbonic anhydrase 3	P07451	P07451	P07451	0.09	0.0198	0.082	0.0272	0.161	0.00721	Cytoplasm	enzyme		acetazolamide,benzthiazide,chlorothiazide,chlorthalidone,hydrochlorothiazide,methazolamide,sulfacetamide,topiramate,trichloromethiazide
CA4	carbonic anhydrase 4	P22748			-0.329	0.179					Plasma Membrane	enzyme		acetazolamide,benzthiazide,chlorothiazide,chlorothiazide/reserpine,chlorthalidone,dichlorphenamide,ethoxyzolamide,hydrochlorothiazide,methazolamide,phentermine/topiramate,sulfacetamide,topiramate,trichloromethiazide
CAB39	calcium binding protein 39	Q9Y376	Q9Y376	Q9Y376	0.068	0.29	0.053	0.199	-0.059	0.00475	Cytoplasm	enzyme
CACNA1S	calcium voltage-gated channel subunit alpha1 S	Q13698	Q13698	Q13698	-0.014	0.222	0.094	0.0956	-0.13	8.26e-06	Plasma Membrane	ion channel		aliskiren/amlodipine,aliskiren/amlodipine/hydrochlorothiazide,amlodipine,amlodipine/atorvastatin,amlodipine/benazepril,amlodipine/celecoxib,amlodipine/ezetimibe/losartan/rosuvastatin,amlodipine/hydrochlorothiazide,amlodipine/hydrochlorothiazide/valsartan,amlodipine/indapamide/perindopril,amlodipine/perindopril,amlodipine/telmisartan,amlodipine/valsartan,bepridil,cinnarizine,dexamethasone/rituxima…
CACNA2D1	calcium voltage-gated channel auxiliary subunit alpha2delta 1	P54289	P54289	P54289	-0.109	0.00157	-0.004	0.192	-0.07	0.0242	Plasma Membrane	ion channel		aliskiren/amlodipine,amlodipine,amlodipine/hydrochlorothiazide/olmesartan medoxomil,amlodipine/hydrochlorothiazide/valsartan,amlodipine/telmisartan,bepridil,enalapril/felodipine,felodipine,gabapentin,isradipine,nicardipine,nifedipine,nilvadipine,nisoldipine,nitrendipine,pregabalin
CACNB1	calcium voltage-gated channel auxiliary subunit beta 1	Q02641	Q02641	Q02641	0.04	0.159	0.041	0.355	-0.481	1.13e-10	Plasma Membrane	ion channel		dexamethasone/rituximab/verapamil,ibutilide,mibefradil,nimodipine,trandolapril/verapamil,verapamil
CACNG1	calcium voltage-gated channel auxiliary subunit gamma 1	Q06432	Q06432		0.059	0.178	0.083	0.198			Plasma Membrane	ion channel		diltiazem,diltiazem/enalapril,lercanidipin,nitrendipine
CALM1 (includes others)	calmodulin 1	P0DP23	P0DP23	P0DP23	-0.133	0.0213	-0.056	0.0882	0.095	0.0244	Cytoplasm	other
CALML5	calmodulin like 5			Q9NZT1					-0.409	0.000152	Cytoplasm	other
CALR	calreticulin	P27797	P27797	P27797	-0.185	0.00223	-0.196	0.00907	0.054	0.335	Cytoplasm	transcription regulator	efficacy,unspecified application
CALU	calumenin	O43852	O43852	O43852	-0.834	2.88e-06	-0.115	0.138	-1.192	4.38e-12	Cytoplasm	other
CAMK2A	calcium/calmodulin dependent protein kinase II alpha	Q9UQM7	Q9UQM7	Q9UQM7	-0.139	0.00263	-0.063	0.0707	-0.461	2.71e-14	Cytoplasm	kinase
CAMK2B	calcium/calmodulin dependent protein kinase II beta	Q13554	Q13554	Q13554	-0.18	1.95e-07	-0.09	0.0411	-0.03	0.221	Cytoplasm	kinase
CAMK2D	calcium/calmodulin dependent protein kinase II delta	Q13557	Q13557	Q13557	-0.397	2.28e-09	-0.394	4.4e-06	-0.16	0.000521	Cytoplasm	kinase
CAMK2G	calcium/calmodulin dependent protein kinase II gamma	Q13555	Q13555	Q13555	-0.262	5.19e-08	-0.229	1.58e-07	-0.217	2.44e-06	Cytoplasm	kinase
CAND1	cullin associated and neddylation dissociated 1	Q86VP6	Q86VP6	Q86VP6	0.063	0.0497	-0.001	0.352	-0.022	0.209	Cytoplasm	transcription regulator
CAND2	cullin associated and neddylation dissociated 2 (putative)	O75155	O75155	O75155	0.11	0.00524	0.089	0.00941	-0.025	0.332	Nucleus	transcription regulator
CANX	calnexin	P27824	P27824	P27824	-0.096	0.19	-0.202	0.0192	-0.333	9.61e-07	Cytoplasm	other	efficacy
CAP1	cyclase associated actin cytoskeleton regulatory protein 1	Q01518	Q01518	Q01518	-0.396	0.000738	-0.042	0.275	-0.929	2.21e-11	Plasma Membrane	other
CAP2	cyclase associated actin cytoskeleton regulatory protein 2	P40123	P40123	P40123	-0.112	5.44e-05	-0.075	0.014	-0.032	0.23	Plasma Membrane	other	disease progression
CAPN1	calpain 1	P07384	P07384	P07384	0.012	0.369	-0.043	0.247	-0.11	0.00186	Cytoplasm	peptidase		alicapistat,BLD-2660
CAPN2	calpain 2	P17655	P17655	P17655	-0.183	0.0146	-0.146	0.0437	-0.142	0.056	Cytoplasm	peptidase		alicapistat,BLD-2660
CAPN3	calpain 3	P20807	P20807	P20807	-0.015	0.343	-0.064	0.0241	-0.054	0.0504	Cytoplasm	peptidase
CAPNS1	calpain small subunit 1	P04632	P04632	P04632	-0.089	0.000854	-0.044	0.036	-0.025	0.0577	Cytoplasm	peptidase
CAPZA1	capping actin protein of muscle Z-line subunit alpha 1	P52907			0.067	0.119					Cytoplasm	other
CAPZA2	capping actin protein of muscle Z-line subunit alpha 2	P47755	P47755	P47755	-0.013	0.185	0.026	0.252	0.097	0.00646	Cytoplasm	other
CAPZB	capping actin protein of muscle Z-line subunit beta	P47756	P47756	P47756	-0.021	0.0853	0.01	0.21	-0.018	0.051	Cytoplasm	other		vacuolin-1
CARD19	caspase recruitment domain family member 19	Q96LW7			-0.01	0.0917					Cytoplasm	other
CARM1	coactivator associated arginine methyltransferase 1	Q86X55			0.165	0.111					Nucleus	transcription regulator
CARNS1	carnosine synthase 1		A5YM72	A5YM72			-0.727	1.05e-08	-0.132	0.00341	Cytoplasm	enzyme
CASQ1	calsequestrin 1	P31415	P31415	P31415	-0.075	0.014	-0.075	0.0168	-0.148	0.000199	Cytoplasm	other	unspecified application
CASQ2	calsequestrin 2	O14958	O14958	O14958	-0.083	0.156	-0.084	0.144	-0.015	0.248	Cytoplasm	other	unspecified application
CAST	calpastatin	P20810	P20810	P20810	-0.107	0.062	0.249	0.0055	-0.578	1.4e-07	Cytoplasm	peptidase
CAT	catalase	P04040	P04040	P04040	0.089	0.227	0.069	0.267	-0.222	0.0494	Cytoplasm	enzyme	diagnosis	fomepizole
CAV1	caveolin 1	Q03135	Q03135	Q03135	-1.187	2.84e-13	-0.713	5.82e-08	0.247	0.199	Plasma Membrane	transmembrane receptor	diagnosis	GSK1278863A
CAVIN1	caveolae associated protein 1	Q6NZI2	Q6NZI2	Q6NZI2	-0.34	8.96e-08	-0.252	1.07e-05	0.165	0.0102	Nucleus	transcription regulator
CAVIN2	caveolae associated protein 2	O95810	O95810	O95810	-0.313	4.46e-05	-0.167	0.0733	-0.376	6.69e-08	Plasma Membrane	other
CAVIN4	caveolae associated protein 4	Q5BKX8	Q5BKX8	Q5BKX8	-0.649	5.03e-08	-1.123	2.66e-08	0.129	0.349	Cytoplasm	other
CBR1	carbonyl reductase 1	P16152	P16152	P16152	-0.22	0.0357	-0.168	0.065	-0.186	0.047	Cytoplasm	enzyme
CCS	copper chaperone for superoxide dismutase	O14618			-0.249	0.0166					Cytoplasm	enzyme
CCT2	chaperonin containing TCP1 subunit 2	P78371	P78371	P78371	0.025	0.117	0.043	0.158	-0.259	2.18e-05	Cytoplasm	kinase
CCT3	chaperonin containing TCP1 subunit 3	P49368	P49368	P49368	-0.071	0.128	-0.082	0.0608	-0.204	0.00572	Cytoplasm	other
CCT4	chaperonin containing TCP1 subunit 4	P50991	P50991	P50991	-0.038	0.28	-0.109	0.00384	-0.307	3.43e-07	Cytoplasm	other
CCT5	chaperonin containing TCP1 subunit 5	P48643	P48643	P48643	-0.077	0.0512	-0.08	0.0144	-0.024	0.0655	Cytoplasm	other
CCT7	chaperonin containing TCP1 subunit 7	Q99832	Q99832	Q99832	-0.102	0.0192	-0.048	0.35	-0.334	1.2e-08	Cytoplasm	other
CCT8	chaperonin containing TCP1 subunit 8	P50990	P50990	P50990	-0.125	0.0224	0.003	0.112	-0.279	7.51e-06	Cytoplasm	other
CCT6A	chaperonin containing TCP1 subunit 6A	P40227	P40227	P40227	-0.232	0.0167	-0.209	0.00648	-0.841	1.1e-14	Cytoplasm	other
CD36	CD36 molecule	P16671	P16671	P16671	-0.053	0.0994	-0.115	0.0197	0.049	0.285	Plasma Membrane	transmembrane receptor	efficacy,unspecified application	VT1021,zeaxanthin
CD38	CD38 molecule	P28907			0.175	0.35					Plasma Membrane	enzyme	efficacy,prognosis,unspecified application	anti-CD38 antibody,anti-CD38 monoclonal antibody,bortezomib/daratumumab/dexamethasone,bortezomib/daratumumab/dexamethasone/lenalidomide,CD38-targeting agent,CM-313,daratumumab,daratumumab/dexamethasone/lenalidomide,daratumumab/dexamethasone/pomalidomide,dexamethasone/isatuximab/pomalidomide,felzartamab,GEN3014,isatuximab,KP1237,mezagitamab,SAR442085,SAR442257,SG301,STI-6129,TAK-573,XmAb18968,Y150…
CD59	CD59 molecule (CD59 blood group)	P13987	P13987	P13987	-0.519	3.09e-12	-0.222	1.09e-06	0.071	0.248	Plasma Membrane	other
CDC37	cell division cycle 37, HSP90 cochaperone	Q16543	Q16543		-0.467	0.000113	-0.448	1.8e-05			Cytoplasm	other
CDC42	cell division cycle 42	P60953	P60953	P60953	0.032	0.304	-0.131	0.151	-0.008	0.049	Cytoplasm	enzyme
CDH13	cadherin 13	P55290	P55290	P55290	-0.262	1.58e-06	-0.284	1.02e-07	-0.233	9.03e-05	Plasma Membrane	other	diagnosis,disease progression,prognosis
CENPV	centromere protein V	Q7Z7K6			0.096	0.3					Nucleus	other
CES2	carboxylesterase 2		O00748				-0.117	0.122			Cytoplasm	enzyme
CFB	complement factor B	P00751	P00751		-0.4	3.56e-05	0.003	0.209			Extracellular Space	peptidase	unspecified application	IONIS-FB-LRx
CFH	complement factor H	P08603	P08603		0.344	0.123	0.305	0.157			Extracellular Space	other	unspecified application	GT103
CFL1	cofilin 1	P23528	P23528	P23528	-0.052	0.039	-0.018	0.339	-0.048	0.0526	Nucleus	other
CFL2	cofilin 2	Q9Y281	Q9Y281	Q9Y281	-0.006	0.0288	0.005	0.339	-0.038	0.0563	Extracellular Space	other
CHCHD2	coiled-coil-helix-coiled-coil-helix domain containing 2	Q9Y6H1	Q9Y6H1	Q9Y6H1	-0.374	0.000578	-0.166	0.000343	-0.772	2.04e-15	Cytoplasm	other
CHCHD3	coiled-coil-helix-coiled-coil-helix domain containing 3	Q9NX63	Q9NX63	Q9NX63	-0.089	0.0492	-0.102	0.0106	-0.267	3.05e-06	Cytoplasm	transcription regulator
CHCHD2P9	coiled-coil-helix-coiled-coil-helix domain containing 2 pseudogene 9		Q5T1J5	Q5T1J5			0.033	0.229	-0.772	2.04e-15	Other	other
CHMP2A	charged multivesicular body protein 2A		O43633				-0.055	0.0342			Cytoplasm	other
CHMP4B	charged multivesicular body protein 4B	Q9H444	Q9H444		-0.727	2.8e-08	-0.435	0.00221			Cytoplasm	other
CIRBP	cold inducible RNA binding protein	Q14011	Q14011		-0.575	8.65e-07	-0.328	6.52e-07			Nucleus	translation regulator
CISD1	CDGSH iron sulfur domain 1	Q9NZ45	Q9NZ45	Q9NZ45	-0.107	0.0501	0.009	0.221	-0.17	3.57e-05	Cytoplasm	enzyme
CKB	creatine kinase B	P12277	P12277	P12277	-0.637	2.25e-07	-0.602	3.82e-07	-0.322	0.00876	Cytoplasm	kinase	safety
CKM	creatine kinase, M-type	P06732	P06732	P06732	0.109	0.000515	0.116	0.00153	-0.013	0.285	Cytoplasm	kinase	efficacy,safety,unspecified application
CKMT2	creatine kinase, mitochondrial 2	P17540	P17540	P17540	0.033	0.235	0.027	0.228	-0.127	0.0152	Cytoplasm	kinase
CLIC5	chloride intracellular channel 5	Q9NZA1	Q9NZA1		0.066	0.188	-0.121	0.26			Cytoplasm	ion channel
CLIP1	CAP-Gly domain containing linker protein 1	P30622			-0.29	9.96e-06					Cytoplasm	other
CLTC	clathrin heavy chain	Q00610	Q00610	Q00610	-0.132	0.00789	-0.017	0.115	-0.031	0.279	Plasma Membrane	other
CLU	clusterin	P10909	P10909	P10909	0.179	0.0426	0.277	0.0186	-0.459	0.00064	Cytoplasm	other	efficacy,unspecified application	AB-16B5,clusterin antisense oligonucleotide
CLYBL	citramalyl-CoA lyase		Q8N0X4				-0.453	0.00329			Cytoplasm	enzyme
CMA1	chymase 1	P23946		P23946	-0.025	0.0709			-0.219	0.0656	Extracellular Space	peptidase		fulacimstat
CMBL	carboxymethylenebutenolidase homolog	Q96DG6	Q96DG6	Q96DG6	0.091	0.00832	0.081	0.0123	0.179	0.00046	Cytoplasm	enzyme
CMPK1	cytidine/uridine monophosphate kinase 1	P30085	P30085	P30085	-0.125	0.0692	-0.317	2.59e-05	-0.427	1.11e-07	Nucleus	kinase
CMYA5	cardiomyopathy associated 5	Q8N3K9	Q8N3K9		-0.023	0.178	-0.109	0.0576			Other	other
CNBP	CCHC-type zinc finger nucleic acid binding protein	P62633	P62633	P62633	-0.158	4.47e-08	-0.13	2.46e-05	-0.071	0.0354	Nucleus	transcription regulator
CNDP2	carnosine dipeptidase 2	Q96KP4	Q96KP4		-0.242	7.91e-05	-0.598	9.85e-10			Cytoplasm	peptidase
CNN1	calponin 1			P51911					0.595	0.11	Cytoplasm	other
COA5	cytochrome c oxidase assembly factor 5	Q86WW8			-0.412	0.14					Cytoplasm	other
COA6	cytochrome c oxidase assembly factor 6	Q5JTJ3	Q5JTJ3		0.094	0.221	-0.017	0.00513			Cytoplasm	other
COASY	Coenzyme A synthase	Q13057	Q13057		-0.361	1.83e-05	-0.394	4.43e-05			Cytoplasm	kinase
COBL	cordon-bleu WH2 repeat protein	O75128	O75128		-0.328	1.16e-05	0.262	0.27			Plasma Membrane	other
COL15A1	collagen type XV alpha 1 chain	P39059	P39059	P39059	-0.183	0.00351	-0.207	0.000428	-0.131	0.0676	Extracellular Space	other		collagenase
COL18A1	collagen type XVIII alpha 1 chain	P39060	P39060		-0.725	1.21e-07	-0.513	3.34e-05			Extracellular Space	other	diagnosis	collagenase
COL1A1	collagen type I alpha 1 chain	P02452	P02452	P02452	-0.527	0.0193	-0.513	0.0161	-0.659	0.0159	Extracellular Space	other	diagnosis	collagenase
COL1A2	collagen type I alpha 2 chain	P08123		P08123	-0.837	0.00236			-0.595	0.066	Extracellular Space	other		collagenase
COL3A1	collagen type III alpha 1 chain	P02461		P02461	-0.113	0.222			-0.409	0.0079	Extracellular Space	other	diagnosis,efficacy	collagenase
COL4A1	collagen type IV alpha 1 chain	P02462	P02462	P02462	-0.187	0.0186	-0.153	0.0536	-0.114	0.0317	Extracellular Space	other	diagnosis	collagenase
COL4A2	collagen type IV alpha 2 chain	P08572	P08572	P08572	-0.153	0.0444	-0.174	0.00932	-0.07	0.0477	Extracellular Space	other		collagenase
COL6A1	collagen type VI alpha 1 chain	P12109	P12109	P12109	-0.117	0.0534	-0.162	0.0258	0.252	0.0359	Extracellular Space	other		collagenase
COL6A2	collagen type VI alpha 2 chain	P12110	P12110	P12110	-0.163	0.0396	-0.166	0.042	0.227	0.0321	Extracellular Space	other		collagenase
COL6A3	collagen type VI alpha 3 chain	P12111	P12111	P12111	-0.148	0.0335	-0.149	0.0289	0.242	0.0194	Extracellular Space	other		collagenase
COMT	catechol-O-methyltransferase	P21964	P21964	P21964	-0.086	0.278	-0.248	0.0138	-0.089	0.105	Cytoplasm	enzyme	diagnosis,efficacy,prognosis,unspecified application	carbidopa/entacapone/levodopa,carbidopa/levodopa/tolcapone,entacapone,nebicapone,opicapone,tolcapone,tyrphostin AG 1288
COMTD1	catechol-O-methyltransferase domain containing 1	Q86VU5	Q86VU5		-0.194	0.156	-0.708	0.042			Plasma Membrane	enzyme
COPB1	COPI coat complex subunit beta 1	P53618			0.001	0.187					Cytoplasm	transporter
COPB2	COPI coat complex subunit beta 2	P35606			-0.059	0.032					Cytoplasm	transporter
COPS2	COP9 signalosome subunit 2	P61201	P61201	P61201	-0.07	0.000169	0.091	0.0453	0.058	0.299	Cytoplasm	other
COPS3	COP9 signalosome subunit 3	Q9UNS2	Q9UNS2		-0.331	0.000171	0.136	0.3			Cytoplasm	other
COPS4	COP9 signalosome subunit 4	Q9BT78	Q9BT78	Q9BT78	-0.091	0.0108	-0.193	0.00539	-0.211	0.00039	Cytoplasm	peptidase
COPS5	COP9 signalosome subunit 5	Q92905	Q92905		-0.04	0.0998	-0.008	0.228			Nucleus	transcription regulator
COPS6	COP9 signalosome subunit 6	Q7L5N1			0.159	0.361					Nucleus	other
COPS7A	COP9 signalosome subunit 7A		Q9UBW8	Q9UBW8			-0.063	0.337	-0.336	1.83e-09	Cytoplasm	other
COQ3	coenzyme Q3, methyltransferase	Q9NZJ6	Q9NZJ6	Q9NZJ6	-0.699	8.81e-08	-0.194	0.00204	-0.343	1.16e-08	Cytoplasm	enzyme
COQ5	coenzyme Q5, methyltransferase	Q5HYK3	Q5HYK3	Q5HYK3	-0.209	0.000114	-0.361	1.78e-06	-0.091	0.0756	Cytoplasm	enzyme
COQ6	coenzyme Q6, monooxygenase	Q9Y2Z9	Q9Y2Z9	Q9Y2Z9	-0.224	0.00457	-0.218	2.73e-05	0.038	0.216	Cytoplasm	enzyme
COQ7	coenzyme Q7, hydroxylase	Q99807	Q99807	Q99807	-0.146	0.00352	-0.098	0.0208	-0.035	0.344	Cytoplasm	enzyme
COQ9	coenzyme Q9	O75208	O75208	O75208	-0.001	0.342	-0.007	0.311	-0.115	0.106	Cytoplasm	other
COQ10A	coenzyme Q10A	Q96MF6	Q96MF6	Q96MF6	-0.079	0.309	-0.177	0.0242	-0.228	0.00143	Cytoplasm	other
COQ8A	coenzyme Q8A	Q8NI60	Q8NI60	Q8NI60	0.053	0.0494	0.041	0.113	-0.021	0.159	Cytoplasm	kinase
CORO6	coronin 6	Q6QEF8	Q6QEF8	Q6QEF8	-0.254	0.000275	-0.235	0.000496	-0.291	5.31e-06	Extracellular Space	other
COX17	cytochrome c oxidase copper chaperone COX17	Q14061	Q14061	Q14061	-0.192	0.000155	-0.221	5.78e-05	-0.517	1.27e-14	Cytoplasm	enzyme
COX4I1	cytochrome c oxidase subunit 4I1	P13073	P13073	P13073	-0.053	0.111	-0.065	0.0652	-0.097	0.0206	Cytoplasm	enzyme
COX5A	cytochrome c oxidase subunit 5A	P20674	P20674	P20674	-0.043	0.15	-0.064	0.0602	-0.102	0.00117	Cytoplasm	enzyme
COX5B	cytochrome c oxidase subunit 5B	P10606	P10606	P10606	-0.081	0.0316	-0.089	0.0201	-0.08	0.0785	Cytoplasm	enzyme
COX6A2	cytochrome c oxidase subunit 6A2	Q02221		Q02221	-0.186	0.0317			-0.26	0.000402	Cytoplasm	enzyme
COX6B1	cytochrome c oxidase subunit 6B1	P14854	P14854	P14854	-0.288	3.44e-05	-0.06	0.0792	-0.188	0.000888	Cytoplasm	enzyme
COX6C	cytochrome c oxidase subunit 6C	P09669	P09669	P09669	0.01	0.253	-0.106	0.0246	-0.111	0.0631	Cytoplasm	enzyme
COX7A1	cytochrome c oxidase subunit 7A1	P24310	P24310	P24310	0.012	0.261	-0.064	0.00215	-0.111	0.0133	Cytoplasm	enzyme
COX7A2	cytochrome c oxidase subunit 7A2	P14406	P14406	P14406	-0.178	0.0241	-0.033	0.202	-0.395	5.7e-09	Cytoplasm	enzyme
COX7C	cytochrome c oxidase subunit 7C	P15954	P15954	P15954	-0.017	0.277	-0.231	0.000495	-0.457	3.04e-09	Cytoplasm	enzyme
CP	ceruloplasmin	P00450	P00450	P00450	0.296	0.0242	0.245	0.0211	-0.316	0.0039	Extracellular Space	enzyme	efficacy	copper
CPA3	carboxypeptidase A3	P15088	P15088		-0.112	0.181	0.114	0.258			Extracellular Space	peptidase
CPNE1	copine 1	Q99829			0.231	0.0462					Cytoplasm	peptidase
CPNE3	copine 3	O75131	O75131		-0.658	2.38e-07	-0.331	0.000172			Cytoplasm	kinase
CPT2	carnitine palmitoyltransferase 2	P23786	P23786	P23786	-0.251	6.46e-05	-0.226	0.00284	-0.353	0.000261	Cytoplasm	enzyme	unspecified application	perhexiline
CPT1B	carnitine palmitoyltransferase 1B	Q92523	Q92523	Q92523	-0.073	0.0417	0.012	0.25	-0.032	0.253	Cytoplasm	enzyme	unspecified application
CRAT	carnitine O-acetyltransferase	P43155	P43155	P43155	0.049	0.143	0.057	0.106	-0.004	0.244	Cytoplasm	enzyme
CRIP1	cysteine rich protein 1	P50238	P50238		-1.174	3.01e-10	-1.256	6.16e-08			Cytoplasm	other	unspecified application
CRIP2	cysteine rich protein 2	P52943			-0.222	0.191					Nucleus	other
CRKL	CRK like proto-oncogene, adaptor protein	P46109	P46109		-0.194	0.339	-0.422	5.96e-05			Cytoplasm	kinase
CRYAB	crystallin alpha B	P02511	P02511	P02511	-0.038	0.218	-0.053	0.139	-0.096	0.0264	Nucleus	other	diagnosis,disease progression,prognosis,unspecified application
CRYM	crystallin mu			Q14894					-1.855	1.75e-07	Cytoplasm	enzyme
CRYZ	crystallin zeta	Q08257	Q08257		-0.086	0.0155	0.05	0.188			Cytoplasm	enzyme
CS	citrate synthase	O75390	O75390	O75390	-0.083	0.0426	-0.081	0.0465	-0.015	0.231	Cytoplasm	enzyme
CSE1L	chromosome segregation 1 like	P55060	P55060	P55060	-0.177	7.29e-05	-0.236	0.000121	-0.246	0.000149	Nucleus	transporter
CSNK2A1	casein kinase 2 alpha 1	P68400			0.086	0.328					Nucleus	kinase		SM1-71
CSNK2A3	casein kinase 2 alpha 3	Q8NEV1			0.086	0.328					Other	other
CSRP1	cysteine and glycine rich protein 1		P21291	P21291			-0.217	0.00307	0.331	0.152	Nucleus	other
CSRP3	cysteine and glycine rich protein 3	P50461	P50461	P50461	-0.235	0.00368	-0.271	0.00156	-0.249	0.00354	Nucleus	other
CSTB	cystatin B	P04080	P04080	P04080	-0.075	0.0223	-0.134	0.000669	-0.075	0.122	Cytoplasm	peptidase	diagnosis
CTSD	cathepsin D	P07339	P07339	P07339	-0.012	0.338	-0.059	0.118	0.085	0.223	Cytoplasm	peptidase	diagnosis,unspecified application
CUL1	cullin 1	Q13616			-0.043	0.185					Nucleus	enzyme	diagnosis
CUL2	cullin 2	Q13617			0.294	0.00118					Nucleus	enzyme
CUL3	cullin 3	Q13618			-0.051	0.265					Nucleus	enzyme
CUL5	cullin 5	Q93034	Q93034	Q93034	-0.098	0.00551	0.045	0.141	-0.334	7.64e-07	Nucleus	ion channel
CUL4A	cullin 4A	Q13619	Q13619	Q13619	0.154	0.13	-0.1	0.00802	-0.45	2.2e-16	Nucleus	enzyme
CUTA	cutA divalent cation tolerance homolog	O60888	O60888	O60888	0.065	0.0487	0.341	0.00868	-0.552	1.19e-11	Cytoplasm	other
CUTC	cutC copper transporter	Q9NTM9	Q9NTM9	Q9NTM9	0.019	0.2	-0.388	8.85e-06	-1.606	3.37e-23	Cytoplasm	other
CYB5B	cytochrome b5 type B	O43169	O43169	O43169	0.052	0.292	0.014	0.186	0.08	0.271	Cytoplasm	enzyme
CYB5R1	cytochrome b5 reductase 1	Q9UHQ9	Q9UHQ9	Q9UHQ9	-0.007	0.353	0.018	0.239	-0.076	0.0245	Cytoplasm	enzyme
CYB5R3	cytochrome b5 reductase 3	P00387	P00387	P00387	-0.11	0.014	-0.111	0.0183	-0.088	0.136	Cytoplasm	enzyme
CYC1	cytochrome c1	P08574	P08574	P08574	-0.033	0.247	-0.016	0.312	-0.028	0.212	Cytoplasm	enzyme
CYCS	cytochrome c, somatic	P99999	P99999	P99999	-0.124	0.00505	-0.135	0.00232	-0.16	0.000282	Cytoplasm	enzyme
CYRIB	CYFIP related Rac1 interactor B	Q9NUQ9			-0.686	2.62e-09					Extracellular Space	other
CZIB	CXXC motif containing zinc binding protein	Q9NWV4	Q9NWV4		0.233	0.365	-0.202	9.95e-05			Cytoplasm	other
DAG1	dystroglycan 1	Q14118	Q14118	Q14118	-0.264	3.72e-05	-0.271	5.62e-06	-0.308	5.99e-06	Plasma Membrane	transmembrane receptor
DARS1	aspartyl-tRNA synthetase 1	P14868	P14868	P14868	-0.163	0.00319	-0.102	0.338	-0.642	1.17e-11	Cytoplasm	enzyme
DBI	diazepam binding inhibitor, acyl-CoA binding protein	P07108	P07108	P07108	-0.045	0.369	-0.098	0.0342	-0.178	0.000165	Cytoplasm	other
DBT	dihydrolipoamide branched chain transacylase E2	P11182	P11182	P11182	-0.231	0.000194	-0.227	0.00746	-0.701	1.54e-11	Cytoplasm	enzyme
DCAF6	DDB1 and CUL4 associated factor 6	Q58WW2			-0.418	0.00124					Nucleus	transcription regulator
DCN	decorin	P07585	P07585	P07585	-0.478	0.035	-0.69	0.0144	0.109	0.268	Extracellular Space	other
DCTN1	dynactin subunit 1	Q14203	Q14203	Q14203	-0.703	1.75e-12	0.144	0.22	-0.915	3.98e-14	Cytoplasm	other
DCTN2	dynactin subunit 2	Q13561	Q13561		-0.129	0.163	-0.205	6.91e-05			Cytoplasm	other
DCXR	dicarbonyl and L-xylulose reductase	Q7Z4W1	Q7Z4W1	Q7Z4W1	0.036	0.17	0.15	0.0281	0.258	0.00133	Cytoplasm	enzyme
DDAH1	dimethylarginine dimethylaminohydrolase 1	O94760	O94760	O94760	-0.116	0.0764	-0.002	0.162	0.212	0.0284	Cytoplasm	enzyme
DDB1	damage specific DNA binding protein 1	Q16531	Q16531	Q16531	0.038	0.197	0.013	0.168	-0.065	0.0108	Nucleus	other
DDOST	dolichyl-diphosphooligosaccharide--protein glycosyltransferase non-catalytic subunit	P39656	P39656	P39656	-0.468	5.91e-07	-0.348	0.000115	-0.076	0.346	Cytoplasm	enzyme
DDT	D-dopachrome tautomerase	P30046	P30046	P30046	-0.318	0.000661	-0.425	5.96e-06	-0.316	8.84e-06	Cytoplasm	enzyme
DDX1	DEAD-box helicase 1	Q92499	Q92499	Q92499	-0.157	0.000248	-0.299	1.87e-05	-0.136	0.0284	Nucleus	enzyme
DDX6	DEAD-box helicase 6	P26196			-0.018	0.32					Nucleus	enzyme
DDX19A	DEAD-box helicase 19A	Q9NUU7	Q9NUU7		-0.166	3.57e-07	-0.657	5.08e-05			Nucleus	enzyme
DDX39B	DExD-box helicase 39B	Q13838	Q13838	Q13838	-0.196	0.000337	-0.541	2.85e-07	-0.396	0.000679	Nucleus	enzyme	safety
DDX3X	DEAD-box helicase 3 X-linked	O00571	O00571	O00571	-0.33	1.49e-05	0.007	0.273	-0.728	6.63e-15	Cytoplasm	enzyme	diagnosis
DECR1	2,4-dienoyl-CoA reductase 1	Q16698	Q16698	Q16698	-0.067	0.126	-0.035	0.153	-0.045	0.208	Cytoplasm	enzyme	unspecified application
DEPTOR	DEP domain containing MTOR interacting protein	Q8TB45			-0.052	0.0313					Cytoplasm	other
DES	desmin	P17661	P17661	P17661	-0.016	0.249	-0.027	0.228	-0.052	0.038	Cytoplasm	other	unspecified application
DGLUCY	D-glutamate cyclase	Q7Z3D6	Q7Z3D6	Q7Z3D6	-0.125	0.0931	-0.071	0.244	-0.152	0.134	Cytoplasm	enzyme
DHRS4	dehydrogenase/reductase 4	Q9BTZ2			-0.007	0.0166					Cytoplasm	enzyme
DHRS7	dehydrogenase/reductase 7	Q9Y394	Q9Y394	Q9Y394	0.019	0.115	0.093	0.188	-0.263	0.0228	Cytoplasm	enzyme
DHRS7B	dehydrogenase/reductase 7B	Q6IAN0	Q6IAN0	Q6IAN0	-0.35	0.00104	-0.446	1.56e-06	-0.55	0.000132	Cytoplasm	enzyme
DHRS7C	dehydrogenase/reductase 7C	A6NNS2	A6NNS2	A6NNS2	-0.234	1.57e-06	-0.314	1.21e-11	-0.209	4.96e-08	Cytoplasm	enzyme
DIABLO	diablo IAP-binding mitochondrial protein		Q9NR28				-0.607	3.89e-07			Cytoplasm	other
DLAT	dihydrolipoamide S-acetyltransferase	P10515	P10515	P10515	-0.014	0.195	-0.019	0.252	-0.165	0.000189	Cytoplasm	enzyme
DLD	dihydrolipoamide dehydrogenase	P09622	P09622	P09622	-0.05	0.0968	-0.033	0.206	-0.069	0.0361	Cytoplasm	enzyme		hexachlorophene
DLST	dihydrolipoamide S-succinyltransferase	P36957	P36957	P36957	-0.03	0.211	-0.059	0.079	0.076	0.0969	Cytoplasm	enzyme
DMAC2L	distal membrane arm assembly component 2 like		Q99766				-0.031	0.205			Cytoplasm	transporter
DMD	dystrophin	P11532	P11532	P11532	-0.106	0.00143	-0.109	0.00104	-0.021	0.108	Plasma Membrane	other		casimersen,golodirsen
DNAJA2	DnaJ heat shock protein family (Hsp40) member A2	O60884	O60884	O60884	-0.102	0.151	0.075	0.0557	-0.282	2.15e-08	Nucleus	enzyme
DNAJA3	DnaJ heat shock protein family (Hsp40) member A3	Q96EY1	Q96EY1		-0.506	4.38e-07	-0.107	0.1			Cytoplasm	other
DNAJA4	DnaJ heat shock protein family (Hsp40) member A4	Q8WW22	Q8WW22	Q8WW22	-0.255	0.00325	-0.55	0.00061	-0.559	6.56e-06	Nucleus	other	safety
DNAJB4	DnaJ heat shock protein family (Hsp40) member B4	Q9UDY4	Q9UDY4	Q9UDY4	-0.08	0.163	-0.068	0.0254	-0.446	6.38e-06	Nucleus	other
DNAJC11	DnaJ heat shock protein family (Hsp40) member C11	Q9NVH1	Q9NVH1		-0.353	5.14e-12	-0.027	0.121			Cytoplasm	other
DNM2	dynamin 2	P50570	P50570		-0.397	1.36e-11	0.016	0.124			Plasma Membrane	enzyme
DNM1L	dynamin 1 like	O00429	O00429	O00429	-0.088	0.00194	0	0.265	-0.128	0.00248	Cytoplasm	enzyme
DNPEP	aspartyl aminopeptidase	Q9ULA0	Q9ULA0		-0.515	9.23e-05	0.083	0.221			Cytoplasm	peptidase
DNPH1	2'-deoxynucleoside 5'-phosphate N-hydrolase 1	O43598	O43598		0.359	1.98e-06	-0.187	0.00503			Nucleus	enzyme
DPP3	dipeptidyl peptidase 3	Q9NY33			-0.263	0.00177					Cytoplasm	peptidase
DPT	dermatopontin	Q07507	Q07507		-0.144	0.0844	-0.82	0.00108			Extracellular Space	other
DPYSL2	dihydropyrimidinase like 2	Q16555	Q16555		-0.247	0.0615	-2.286	0.0164			Cytoplasm	enzyme
DPYSL3	dihydropyrimidinase like 3	Q14195	Q14195	Q14195	-0.296	0.00852	-0.412	2.38e-05	-0.07	0.257	Cytoplasm	enzyme	unspecified application
DSTN	destrin, actin depolymerizing factor		P60981				-0.062	0.301			Cytoplasm	other
DTNA	dystrobrevin alpha	Q9Y4J8	Q9Y4J8	Q9Y4J8	-0.073	0.085	-0.227	0.000238	0.118	0.185	Plasma Membrane	other	unspecified application
DUSP3	dual specificity phosphatase 3	P51452	P51452	P51452	-0.003	0.294	-0.051	0.112	-0.185	2.39e-06	Cytoplasm	phosphatase
DUSP29	dual specificity phosphatase 29	Q68J44	Q68J44		0.197	0.0891	-0.978	7.12e-06			Cytoplasm	enzyme
DYNC1H1	dynein cytoplasmic 1 heavy chain 1	Q14204	Q14204	Q14204	-0.172	9.33e-05	-0.154	0.000766	-0.205	0.000607	Cytoplasm	peptidase
DYNC1I2	dynein cytoplasmic 1 intermediate chain 2	Q13409			-0.086	0.232					Cytoplasm	other
DYNC1LI1	dynein cytoplasmic 1 light intermediate chain 1	Q9Y6G9			-0.713	2.14e-08					Cytoplasm	other
DYNLL2	dynein light chain LC8-type 2	Q96FJ2	Q96FJ2	Q96FJ2	-0.328	0.000154	-0.217	1.99e-09	0.089	0.0281	Cytoplasm	other
DYNLRB1	dynein light chain roadblock-type 1	Q9NP97			-0.192	0.359					Cytoplasm	other
DYSF	dysferlin	O75923	O75923	O75923	-0.006	0.278	-0.013	0.227	-0.077	0.00629	Plasma Membrane	other
ECH1	enoyl-CoA hydratase 1	Q13011	Q13011	Q13011	0.059	0.104	0.064	0.13	0.115	0.182	Cytoplasm	enzyme
ECHDC3	enoyl-CoA hydratase domain containing 3	Q96DC8	Q96DC8	Q96DC8	0.133	0.0375	-0.373	0.000499	-0.056	0.16	Cytoplasm	enzyme
ECHS1	enoyl-CoA hydratase, short chain 1	P30084	P30084	P30084	0.012	0.225	0.022	0.169	0.088	0.0276	Cytoplasm	enzyme
ECI1	enoyl-CoA delta isomerase 1	P42126	P42126	P42126	0.019	0.348	0.044	0.347	0.338	0.0118	Cytoplasm	enzyme
ECI2	enoyl-CoA delta isomerase 2	O75521	O75521	O75521	-0.058	0.192	-0.058	0.167	-0.324	1.51e-05	Cytoplasm	enzyme
ECPAS	Ecm29 proteasome adaptor and scaffold	Q5VYK3	Q5VYK3	Q5VYK3	-0.079	0.0121	-0.088	0.00478	-0.199	4.58e-05	Cytoplasm	other
EDF1	endothelial differentiation related factor 1	O60869	O60869		-0.565	9.81e-09	-0.369	2.13e-09			Nucleus	transcription regulator
EEF2	eukaryotic translation elongation factor 2	P13639	P13639	P13639	0.004	0.319	0.016	0.315	-0.041	0.0144	Cytoplasm	translation regulator		MDNA55,tagraxofusp
EEF1A1	eukaryotic translation elongation factor 1 alpha 1	P68104	P68104	P68104	-0.062	0.0847	-0.059	0.0604	0.032	0.319	Cytoplasm	translation regulator
EEF1A2	eukaryotic translation elongation factor 1 alpha 2	Q05639	Q05639	Q05639	-0.011	0.283	-0.039	0.0718	-0.08	0.117	Cytoplasm	translation regulator	prognosis,unspecified application
EEF1B2	eukaryotic translation elongation factor 1 beta 2	P24534	P24534	P24534	-0.152	0.0492	-0.162	0.0174	-0.434	6.01e-13	Cytoplasm	translation regulator
EEF1D	eukaryotic translation elongation factor 1 delta	P29692	P29692	P29692	-0.186	3.53e-05	-0.177	0.000119	-0.226	0.00688	Cytoplasm	translation regulator
EEF1G	eukaryotic translation elongation factor 1 gamma	P26641	P26641	P26641	-0.1	0.00322	-0.069	0.0617	-0.161	8.21e-06	Cytoplasm	translation regulator
EHBP1L1	EH domain binding protein 1 like 1	Q8N3D4	Q8N3D4		-0.271	1.04e-05	-0.458	5.91e-14			Other	other
EHD1	EH domain containing 1	Q9H4M9	Q9H4M9		-1.017	2.04e-05	0.122	0.00161			Cytoplasm	other
EHD2	EH domain containing 2	Q9NZN4	Q9NZN4	Q9NZN4	-0.242	8.52e-05	-0.292	2.01e-06	0.057	0.268	Nucleus	other
EHD4	EH domain containing 4	Q9H223			-0.929	4.7e-10					Plasma Membrane	enzyme
EIF1	eukaryotic translation initiation factor 1		P41567				-0.127	0.119			Cytoplasm	translation regulator
EIF5	eukaryotic translation initiation factor 5	P55010	P55010	P55010	-0.24	2.33e-06	-0.062	4.63e-05	0.003	0.31	Cytoplasm	translation regulator
EIF1AX	eukaryotic translation initiation factor 1A X-linked		P47813				-0.269	0.00142			Cytoplasm	translation regulator	diagnosis,unspecified application
EIF1AY	eukaryotic translation initiation factor 1A Y-linked		O14602				-0.269	0.00142			Cytoplasm	translation regulator
EIF2S1	eukaryotic translation initiation factor 2 subunit alpha	P05198	P05198	P05198	0.001	0.286	-0.081	0.00589	-1.017	7.04e-16	Cytoplasm	translation regulator	efficacy
EIF2S3	eukaryotic translation initiation factor 2 subunit gamma	P41091	P41091		-0.131	8.2e-05	0.122	0.184			Cytoplasm	translation regulator
EIF3A	eukaryotic translation initiation factor 3 subunit A	Q14152	Q14152	Q14152	-0.364	0.000192	-0.409	3.85e-05	-0.273	6.25e-05	Cytoplasm	translation regulator
EIF3B	eukaryotic translation initiation factor 3 subunit B	P55884			-0.675	2.74e-05					Cytoplasm	translation regulator
EIF3C	eukaryotic translation initiation factor 3 subunit C	Q99613	Q99613		-0.482	0.00497	-0.074	0.0824			Cytoplasm	translation regulator	unspecified application
EIF3D	eukaryotic translation initiation factor 3 subunit D	O15371			-0.685	0.152					Cytoplasm	translation regulator
EIF3E	eukaryotic translation initiation factor 3 subunit E	P60228	P60228	P60228	-0.129	0.0581	-0.232	0.00102	-0.152	0.319	Cytoplasm	translation regulator
EIF3F	eukaryotic translation initiation factor 3 subunit F		O00303				-0.037	0.116			Cytoplasm	translation regulator
EIF3G	eukaryotic translation initiation factor 3 subunit G	O75821			-0.132	0.0808					Cytoplasm	translation regulator
EIF3J	eukaryotic translation initiation factor 3 subunit J	O75822	O75822		-0.874	0.000101	-0.298	0.000332			Cytoplasm	translation regulator
EIF3L	eukaryotic translation initiation factor 3 subunit L		Q9Y262				-0.175	0.0643			Cytoplasm	translation regulator
EIF3M	eukaryotic translation initiation factor 3 subunit M	Q7L2H7	Q7L2H7		0.001	0.0889	-0.368	3.25e-07			Cytoplasm	translation regulator
EIF4A1	eukaryotic translation initiation factor 4A1	P60842			-0.016	0.28					Cytoplasm	translation regulator
EIF4A2	eukaryotic translation initiation factor 4A2	Q14240	Q14240	Q14240	-0.347	2.46e-07	-0.076	0.0335	-0.089	0.00976	Cytoplasm	translation regulator
EIF4B	eukaryotic translation initiation factor 4B	P23588	P23588	P23588	0.173	0.000296	0.286	4.85e-05	-0.641	2.66e-15	Cytoplasm	translation regulator	unspecified application
EIF4G1	eukaryotic translation initiation factor 4 gamma 1	Q04637	Q04637	Q04637	-0.074	0.0197	-0.052	0.00118	-0.023	0.193	Cytoplasm	translation regulator
EIF4G2	eukaryotic translation initiation factor 4 gamma 2	P78344	P78344		0.192	0.00876	-0.043	0.0405			Cytoplasm	translation regulator
EIF4H	eukaryotic translation initiation factor 4H	Q15056	Q15056		-0.743	3.36e-11	-0.196	0.282			Cytoplasm	translation regulator
EIF5A	eukaryotic translation initiation factor 5A	P63241	P63241	P63241	-0.058	0.00492	-0.039	0.0403	0.016	0.272	Cytoplasm	translation regulator		SNS01-T nanoparticles
ELOB	elongin B	Q15370	Q15370	Q15370	-0.124	0.0158	0.036	0.142	0.011	0.274	Nucleus	transcription regulator
ELOC	elongin C	Q15369	Q15369	Q15369	0.054	0.25	-0.3	5.04e-07	-0.158	0.00194	Nucleus	transcription regulator
EMC3	ER membrane protein complex subunit 3	Q9P0I2			0.185	0.0148					Nucleus	other
EML1	EMAP like 1	O00423			-0.385	3.83e-05					Cytoplasm	other
ENDOD1	endonuclease domain containing 1	O94919	O94919		-0.136	0.0601	-0.114	0.0134			Extracellular Space	enzyme
ENDOG	endonuclease G	Q14249	Q14249		-0.067	0.188	0.114	0.161			Cytoplasm	enzyme
ENO1	enolase 1	P06733	P06733	P06733	-0.048	0.00158	-0.059	0.000141	-0.008	0.159	Cytoplasm	enzyme	diagnosis
ENO3	enolase 3	P13929	P13929	P13929	0.021	0.281	-0.004	0.342	-0.035	0.243	Cytoplasm	enzyme	unspecified application
ENOPH1	enolase-phosphatase 1	Q9UHY7	Q9UHY7		-0.221	0.00027	-0.369	5.55e-06			Cytoplasm	enzyme
EPB41	erythrocyte membrane protein band 4.1	P11171	P11171		-0.117	0.359	-0.565	0.00132			Plasma Membrane	other
EPB42	erythrocyte membrane protein band 4.2	P16452	P16452	P16452	0.095	0.369	-0.061	0.157	-0.916	5.03e-06	Plasma Membrane	transporter
EPHX1	epoxide hydrolase 1	P07099	P07099	P07099	0.16	0.0257	0.139	0.0358	-0.015	0.205	Cytoplasm	peptidase	diagnosis
EPHX2	epoxide hydrolase 2			P34913					-0.045	0.301	Cytoplasm	enzyme	unspecified application	EC5026
EPRS1	glutamyl-prolyl-tRNA synthetase 1	P07814	P07814		-0.09	0.000195	-0.048	0.0409			Cytoplasm	enzyme
ERAP1	endoplasmic reticulum aminopeptidase 1	Q9NZ08	Q9NZ08		-0.442	1.82e-05	-0.537	8.03e-05			Extracellular Space	peptidase
ERGIC1	endoplasmic reticulum-golgi intermediate compartment 1	Q969X5			-0.192	0.0136					Cytoplasm	other
ERLIN2	ER lipid raft associated 2	O94905	O94905	O94905	0.096	0.0132	0.233	0.00133	0.071	0.18	Cytoplasm	other
ERP29	endoplasmic reticulum protein 29	P30040	P30040	P30040	-0.338	0.000863	-0.156	0.104	0.041	0.141	Cytoplasm	transporter
ESD	esterase D	P10768	P10768	P10768	-0.104	0.000172	-0.173	5.37e-07	-0.112	0.0017	Cytoplasm	enzyme
ESYT1	extended synaptotagmin 1			Q9BSJ8					-0.023	0.321	Cytoplasm	transporter
ESYT2	extended synaptotagmin 2	A0FGR8			0.069	0.35					Plasma Membrane	other
ETF1	eukaryotic translation termination factor 1	P62495			-0.125	0.231					Cytoplasm	translation regulator
ETFA	electron transfer flavoprotein subunit alpha	P13804	P13804	P13804	-0.034	0.219	-0.015	0.267	0.078	0.144	Cytoplasm	transporter
ETFB	electron transfer flavoprotein subunit beta	P38117	P38117	P38117	-0.068	0.159	-0.048	0.137	0.083	0.112	Cytoplasm	transporter	unspecified application
ETFDH	electron transfer flavoprotein dehydrogenase	Q16134	Q16134	Q16134	-0.247	0.000114	-0.155	0.00389	0.236	0.0148	Cytoplasm	enzyme
EZR	ezrin	P15311			-0.401	0.00108					Plasma Membrane	other	prognosis
F2	coagulation factor II, thrombin	P00734	P00734	P00734	-0.058	0.0196	0.4	0.00861	-0.62	1.79e-05	Extracellular Space	peptidase	diagnosis,unspecified application	argatroban,aspirin/bivalirudin,aspirin/dabigatran etexilate,aspirin/eptifibatide/heparin,bivalirudin,dabigatran,dabigatran etexilate,desirudin,efegatran,enoxaparin,heparin,lepirudin,thrombin inhibitor,tinzaparin,ulinastatin,ximelagatran
FABP3	fatty acid binding protein 3	P05413	P05413	P05413	0.069	0.0879	0.074	0.0797	0.236	0.000962	Cytoplasm	transporter	diagnosis,unspecified application
FABP4	fatty acid binding protein 4	P15090	P15090	P15090	-0.347	0.0104	-0.645	8.4e-08	-0.012	0.33	Cytoplasm	transporter	disease progression
FABP5	fatty acid binding protein 5	Q01469	Q01469	Q01469	-0.024	0.288	-0.074	0.0232	0.068	0.229	Cytoplasm	transporter	disease progression
FAH	fumarylacetoacetate hydrolase	P16930	P16930	P16930	0.12	0.0512	0.061	0.216	-0.121	0.00354	Cytoplasm	enzyme
FAHD1	fumarylacetoacetate hydrolase domain containing 1	Q6P587	Q6P587	Q6P587	-0.237	0.0455	0.108	0.0791	-0.543	1.9e-07	Cytoplasm	enzyme
FAHD2A	fumarylacetoacetate hydrolase domain containing 2A	Q96GK7			0.109	0.107					Other	enzyme
FAM136A	family with sequence similarity 136 member A	Q96C01			-0.044	0.251					Cytoplasm	other
FAM162A	family with sequence similarity 162 member A	Q96A26	Q96A26	Q96A26	-0.157	0.0274	-0.252	4.98e-06	-0.148	0.018	Cytoplasm	other
FAM210B	family with sequence similarity 210 member B	Q96KR6			0.401	0.0019					Extracellular Space	other
FARSA	phenylalanyl-tRNA synthetase subunit alpha	Q9Y285	Q9Y285	Q9Y285	-0.071	0.0615	-0.041	0.145	-0.054	0.257	Cytoplasm	enzyme
FARSB	phenylalanyl-tRNA synthetase subunit beta	Q9NSD9	Q9NSD9	Q9NSD9	-0.233	0.00514	-0.014	0.281	-0.796	4.44e-09	Cytoplasm	enzyme
FBN1	fibrillin 1	P35555	P35555	P35555	-0.393	0.00479	-0.385	0.0046	-0.02	0.293	Extracellular Space	other
FBP1	fructose-bisphosphatase 1	P09467	P09467		-0.223	0.00326	-0.22	0.00138			Cytoplasm	phosphatase
FBP2	fructose-bisphosphatase 2	O00757	O00757	O00757	-0.186	0.00352	-0.231	0.000568	0.094	0.169	Cytoplasm	phosphatase
FECH	ferrochelatase		P22830				-0.558	7.99e-10			Cytoplasm	enzyme
FERMT2	FERM domain containing kindlin 2	Q96AC1	Q96AC1	Q96AC1	-0.489	1.05e-08	0.147	0.0449	-0.334	0.000665	Cytoplasm	other	disease progression
FGA	fibrinogen alpha chain	P02671	P02671	P02671	0.307	0.202	0.299	0.213	-0.482	0.0172	Extracellular Space	other	diagnosis,unspecified application	F2
FGB	fibrinogen beta chain	P02675	P02675	P02675	0.265	0.222	0.297	0.208	-0.499	0.0279	Extracellular Space	other	unspecified application	F2
FGG	fibrinogen gamma chain	P02679	P02679	P02679	0.267	0.239	0.242	0.238	-0.568	0.0114	Extracellular Space	other		F2
FH	fumarate hydratase	P07954	P07954	P07954	-0.021	0.258	0.002	0.332	-0.057	0.0425	Cytoplasm	enzyme
FHL1	four and a half LIM domains 1	Q13642	Q13642	Q13642	0.006	0.131	0.019	0.0551	0.032	0.23	Cytoplasm	other
FHL3	four and a half LIM domains 3	Q13643	Q13643	Q13643	-0.095	0.0318	-0.06	0.144	-0.08	0.148	Plasma Membrane	other
FHOD1	formin homology 2 domain containing 1	Q9Y613	Q9Y613	Q9Y613	0.008	0.273	-0.012	0.355	-0.091	0.00498	Cytoplasm	other
FIS1	fission, mitochondrial 1	Q9Y3D6	Q9Y3D6	Q9Y3D6	0.003	0.324	-0.009	0.216	0.139	0.00219	Cytoplasm	other
FITM1	fat storage inducing transmembrane protein 1	A5D6W6	A5D6W6		-0.397	0.0103	-0.039	0.355			Extracellular Space	other
FKBP3	FKBP prolyl isomerase 3	Q00688	Q00688	Q00688	0.011	0.33	0.051	0.0916	-0.016	0.234	Nucleus	enzyme
FKBP1A	FKBP prolyl isomerase 1A	P62942	P62942	P62942	-0.101	2.06e-06	-0.056	0.00113	-0.21	4.56e-05	Cytoplasm	enzyme	unspecified application	corticosteroid/everolimus/tacrolimus,corticosteroid/sirolimus,cyclosporine A/sirolimus/tacrolimus,cyclosporine A/tacrolimus,everolimus,everolimus/exemestane,everolimus/fulvestrant,everolimus/gefitinib,everolimus/letrozole,everolimus/paclitaxel,everolimus/panobinostat,everolimus/pasireotide,everolimus/ribociclib,everolimus/tamoxifen,imatinib/sirolimus,lenalidomide/temsirolimus,metformin/sirolimus,…
FLNA	filamin A	P21333	P21333	P21333	-0.553	7.1e-05	-0.541	0.000182	0.176	0.198	Cytoplasm	other	unspecified application
FLNC	filamin C	Q14315	Q14315	Q14315	-0.105	0.00194	-0.109	0.00136	-0.13	0.00014	Cytoplasm	other	diagnosis
FLOT1	flotillin 1	O75955	O75955		0.087	0.234	0.036	0.229			Plasma Membrane	other
FLOT2	flotillin 2	Q14254			-0.08	0.301					Plasma Membrane	other
FN1	fibronectin 1	P02751	P02751	P02751	0.144	0.243	0.244	0.12	-0.395	0.00267	Extracellular Space	other	diagnosis,efficacy,prognosis,unspecified application	AS1409,bifikafusp alfa,dodekin,iodine I 131 anti-fibronectin antibody fragment L19-SIP,L19-IL2 monoclonal antibody-cytokine fusion protein/L19TNFalpha,L19TNFalpha,ocriplasmin
FN3K	fructosamine 3 kinase	Q9H479	Q9H479		-0.235	7.04e-06	-0.306	1.08e-06			Cytoplasm	kinase
FNTA	farnesyltransferase, CAAX box, alpha	P49354			-1.579	2.07e-08					Cytoplasm	enzyme		lonafarnib
FTH1	ferritin heavy chain 1	P02794	P02794	P02794	-0.112	0.35	-0.498	0.00432	0.815	0.00973	Cytoplasm	enzyme	unspecified application
FUNDC2	FUN14 domain containing 2	Q9BWH2	Q9BWH2	Q9BWH2	0.137	0.00852	-0.063	0.0956	-0.791	5.51e-12	Cytoplasm	other
FUS	FUS RNA binding protein	P35637			-0.18	0.0394					Nucleus	transcription regulator
FXR1	FMR1 autosomal homolog 1	P51114	P51114	P51114	-0.004	0.0775	-0.178	3.61e-05	-0.166	0.238	Cytoplasm	other
FYCO1	FYVE and coiled-coil domain autophagy adaptor 1	Q9BQS8			-0.06	0.144					Cytoplasm	other
G3BP1	G3BP stress granule assembly factor 1	Q13283	Q13283		-0.295	0.233	-0.464	3.38e-06			Nucleus	enzyme
GABARAPL2	GABA type A receptor associated protein like 2	P60520			0.455	0.000317					Cytoplasm	other
GAMT	guanidinoacetate N-methyltransferase	Q14353	Q14353	Q14353	-0.064	0.0741	-0.041	0.19	-0.038	0.107	Cytoplasm	enzyme
GANAB	glucosidase II alpha subunit	Q14697	Q14697	Q14697	-0.355	0.000246	-0.289	0.0151	-0.282	8.38e-05	Cytoplasm	enzyme		miglitol
GAPDH	glyceraldehyde-3-phosphate dehydrogenase	P04406	P04406	P04406	0.032	0.179	0.041	0.167	-0.126	0.000795	Cytoplasm	enzyme	diagnosis,unspecified application
GARS1	glycyl-tRNA synthetase 1	P41250			-0.338	0.000976					Cytoplasm	enzyme
GART	phosphoribosylglycinamide formyltransferase, phosphoribosylglycinamide synthetase, phosphoribosylaminoimidazole synthetase	P22102	P22102		-0.54	0.00508	-0.471	0.0883			Cytoplasm	enzyme	prognosis,safety	bevacizumab/erlotinib/pemetrexed,bevacizumab/paclitaxel/pemetrexed,bevacizumab/pemetrexed,gemcitabine/pemetrexed,lometrexol,pelitrexol,pembrolizumab/pemetrexed,pemetrexed
GATD3/LOC102724023	glutamine amidotransferase class 1 domain containing 3	A0A0B4J2D5	A0A0B4J2D5	A0A0B4J2D5	-0.054	0.234	-0.056	0.193	-0.06	0.065	Cytoplasm	other
GBE1	1,4-alpha-glucan branching enzyme 1	Q04446	Q04446	Q04446	-0.202	0.00333	-0.247	0.00268	-0.268	0.000112	Cytoplasm	enzyme
GC	GC vitamin D binding protein	P02774	P02774	P02774	0.151	0.0494	0.186	0.0119	-0.052	0.223	Extracellular Space	transporter	unspecified application
GCLC	glutamate-cysteine ligase catalytic subunit	P48506			-0.294	0.244					Cytoplasm	enzyme
GCLM	glutamate-cysteine ligase modifier subunit	P48507			-0.046	0.124					Cytoplasm	enzyme
GCN1	GCN1 activator of EIF2AK4			Q92616					-0.161	0.191	Cytoplasm	translation regulator
GCSH	glycine cleavage system protein H		P23434				-0.613	1.99e-06			Cytoplasm	enzyme
GDI1	GDP dissociation inhibitor 1	P31150	P31150	P31150	-0.617	3.2e-12	-0.102	0.12	0.027	0.273	Cytoplasm	other
GDI2	GDP dissociation inhibitor 2	P50395	P50395	P50395	-0.074	0.000387	-0.074	0.000716	-0.074	0.00952	Cytoplasm	other
GET3	guided entry of tail-anchored proteins factor 3, ATPase	O43681	O43681		-0.349	0.00106	-0.598	1.48e-07			Nucleus	transporter
GFM1	G elongation factor mitochondrial 1	Q96RP9			-0.322	8.84e-05					Cytoplasm	translation regulator
GGCT	gamma-glutamylcyclotransferase	O75223	O75223		-0.19	0.0505	-0.648	3.82e-09			Cytoplasm	enzyme
GHITM	growth hormone inducible transmembrane protein	Q9H3K2	Q9H3K2		0.02	0.327	-0.126	0.0302			Cytoplasm	transporter	unspecified application
GLO1	glyoxalase I	Q04760	Q04760	Q04760	-0.07	0.00379	-0.123	0.000111	-0.147	1.14e-07	Cytoplasm	enzyme
GLOD4	glyoxalase domain containing 4	Q9HC38	Q9HC38	Q9HC38	-0.191	2.02e-05	-0.301	1.26e-06	-0.367	9.32e-12	Cytoplasm	enzyme
GLRX	glutaredoxin	P35754	P35754	P35754	0.166	0.00942	0.177	0.0213	0.116	0.0672	Cytoplasm	enzyme
GLRX3	glutaredoxin 3	O76003		O76003	-0.195	0.000188			-0.086	0.214	Cytoplasm	enzyme
GLUD1	glutamate dehydrogenase 1	P00367	P00367		-0.211	0.0229	-0.263	0.00101			Cytoplasm	enzyme	unspecified application
GMFB	glia maturation factor beta	P60983			0.022	0.203					Cytoplasm	growth factor
GMPR	guanosine monophosphate reductase	P36959	P36959	P36959	-0.358	4.19e-06	-0.156	0.000394	0.029	0.148	Cytoplasm	enzyme
GNAS	GNAS complex locus	Q5JWF2			0.074	0.147					Plasma Membrane	enzyme	unspecified application
GNB2	G protein subunit beta 2	P62879	P62879		-0.106	0.0735	-0.007	0.16			Plasma Membrane	other
GNPDA1	glucosamine-6-phosphate deaminase 1	P46926	P46926		-0.43	1.46e-07	-0.065	0.0906			Cytoplasm	enzyme
GOT1	glutamic-oxaloacetic transaminase 1	P17174	P17174	P17174	-0.013	0.274	-0.008	0.291	-0.007	0.329	Cytoplasm	enzyme
GOT2	glutamic-oxaloacetic transaminase 2	P00505	P00505	P00505	-0.017	0.297	-0.014	0.321	-0.04	0.17	Cytoplasm	enzyme
GPD1	glycerol-3-phosphate dehydrogenase 1	P21695	P21695	P21695	0.07	0.0822	0.108	0.00945	-0.016	0.22	Cytoplasm	enzyme	unspecified application
GPD2	glycerol-3-phosphate dehydrogenase 2	P43304	P43304	P43304	-0.146	0.00302	-0.105	0.0366	0.125	0.0616	Cytoplasm	enzyme
GPD1L	glycerol-3-phosphate dehydrogenase 1 like	Q8N335	Q8N335	Q8N335	-0.043	0.144	-0.068	0.0296	0.056	0.179	Cytoplasm	enzyme
GPI	glucose-6-phosphate isomerase	P06744	P06744	P06744	-0.064	0.0551	-0.073	0.0328	-0.125	2.52e-05	Extracellular Space	enzyme	unspecified application
GPS1	G protein pathway suppressor 1	Q13098	Q13098		-0.452	1.27e-07	-0.54	7.38e-09			Nucleus	other
GPT	glutamic--pyruvic transaminase	P24298	P24298	P24298	0.057	0.224	0.098	0.0667	0.407	7.65e-07	Cytoplasm	enzyme
GPX1	glutathione peroxidase 1	P07203	P07203	P07203	0.015	0.366	-0.016	0.142	-0.16	0.0913	Cytoplasm	enzyme	diagnosis,efficacy
GPX3	glutathione peroxidase 3	P22352	P22352		-0.813	6.73e-09	-0.587	1.42e-06			Extracellular Space	enzyme	unspecified application
GPX4	glutathione peroxidase 4	P36969	P36969	P36969	0.108	0.0548	0.153	0.0369	-0.339	7.68e-08	Cytoplasm	enzyme
GRB2	growth factor receptor bound protein 2	P62993	P62993		-0.135	0.00171	-0.03	0.103			Cytoplasm	other		liposome-incorporated Grb2 antisense oligodeoxynucleotide
GRHPR	glyoxylate and hydroxypyruvate reductase	Q9UBQ7	Q9UBQ7	Q9UBQ7	-0.077	0.031	0.008	0.354	-0.03	0.219	Cytoplasm	enzyme		GSK1278863A
GRSF1	G-rich RNA sequence binding factor 1	Q12849		Q12849	0.157	0.0694			-0.609	1.22e-13	Cytoplasm	other
GSN	gelsolin	P06396	P06396	P06396	-0.466	0.000234	-0.446	8.61e-05	0.118	0.201	Extracellular Space	other	disease progression,efficacy
GSPT2	G1 to S phase transition 2		Q8IYD1				-0.008	0.185			Cytoplasm	translation regulator
GSR	glutathione-disulfide reductase	P00390	P00390	P00390	-0.019	0.363	-0.39	5.25e-05	-0.804	5.89e-15	Cytoplasm	enzyme		carmustine,carmustine/prednisone
GSTK1	glutathione S-transferase kappa 1	Q9Y2Q3	Q9Y2Q3	Q9Y2Q3	-0.09	0.0836	-0.151	0.000516	-0.659	3.73e-11	Cytoplasm	enzyme
GSTM1	glutathione S-transferase mu 1	P09488	P09488	P09488	-0.098	0.22	-0.118	0.204	0.73	0.000455	Cytoplasm	enzyme	diagnosis,efficacy,safety,unspecified application
GSTM2	glutathione S-transferase mu 2	P28161	P28161	P28161	-0.098	0.0828	-0.075	0.164	0.199	0.00491	Cytoplasm	enzyme	diagnosis,prognosis
GSTM3	glutathione S-transferase mu 3	P21266	P21266	P21266	0.037	0.173	0.053	0.156	-0.05	0.134	Cytoplasm	enzyme	diagnosis,prognosis
GSTM4	glutathione S-transferase mu 4			Q03013					1.961	0.000135	Cytoplasm	enzyme	prognosis
GSTO1	glutathione S-transferase omega 1	P78417	P78417	P78417	-0.277	2.21e-08	-0.202	6.22e-06	-0.264	2.99e-06	Cytoplasm	enzyme	unspecified application
GSTP1	glutathione S-transferase pi 1	P09211	P09211	P09211	-0.064	0.0206	-0.04	0.0211	0.069	0.0554	Cytoplasm	enzyme	diagnosis,efficacy,prognosis,safety,unspecified application	zeaxanthin
GSTT1	glutathione S-transferase theta 1	P30711	P30711	P30711	-0.391	0.000919	-0.401	0.000634	-0.124	0.242	Cytoplasm	enzyme	diagnosis,efficacy
GSTT2/GSTT2B	glutathione S-transferase theta 2B			P0CG30					-0.022	0.337	Cytoplasm	enzyme
GSTZ1	glutathione S-transferase zeta 1		O43708				0.068	0.326			Cytoplasm	enzyme
GYG1	glycogenin 1	P46976	P46976	P46976	-0.091	0.0137	-0.042	0.047	-0.184	4.37e-07	Cytoplasm	enzyme
GYS1	glycogen synthase 1	P13807	P13807	P13807	-0.021	0.195	-0.054	0.067	-0.289	1.17e-11	Cytoplasm	enzyme
H1-0	H1.0 linker histone	P07305	P07305	P07305	-0.126	0.356	-0.438	4.27e-05	-1.622	2.95e-18	Nucleus	other
H1-2	H1.2 linker histone, cluster member			P16403					-0.328	0.00133	Nucleus	other
H1-4	H1.4 linker histone, cluster member	P10412	P10412		-0.35	8.57e-07	-0.351	1.15e-06			Nucleus	other
H2AC6	H2A clustered histone 6	Q93077	Q93077	Q93077	-0.217	5.35e-05	-0.315	3.85e-06	0.053	0.23	Nucleus	other
H2AC7	H2A clustered histone 7	P20671	P20671	P20671	-0.217	5.35e-05	-0.315	3.85e-06	0.053	0.23	Nucleus	other
H2AC12	H2A clustered histone 12	Q96KK5	Q96KK5	Q96KK5	-0.217	5.35e-05	-0.315	3.85e-06	0.053	0.23	Nucleus	other
H2AC14	H2A clustered histone 14	Q99878	Q99878	Q99878	-0.217	5.35e-05	-0.315	3.85e-06	0.053	0.23	Nucleus	other
H2AC20	H2A clustered histone 20	Q16777	Q16777	Q16777	-0.217	5.35e-05	-0.315	3.85e-06	0.053	0.23	Nucleus	other
H2AC21	H2A clustered histone 21	Q8IUE6	Q8IUE6		-0.652	2.63e-07	-0.228	0.00309			Nucleus	other
H2AC25	H2A clustered histone 25	Q7L7L0	Q7L7L0	Q7L7L0	-0.217	5.35e-05	-0.315	3.85e-06	0.053	0.23	Nucleus	other
H2AJ	H2A.J histone	Q9BTM1	Q9BTM1	Q9BTM1	-0.217	5.35e-05	-0.315	3.85e-06	0.053	0.23	Cytoplasm	other
H2AZ1	H2A.Z variant histone 1			P0C0S5					0.528	0.201	Nucleus	other
H2BC3	H2B clustered histone 3	P33778	P33778	P33778	-0.207	2.33e-05	-0.166	0.000343	-0.158	0.00157	Nucleus	other
H2BC5	H2B clustered histone 5	P58876	P58876	P58876	-0.52	4.73e-06	-0.646	2.29e-09	-0.335	2.1e-05	Nucleus	other
H2BC9	H2B clustered histone 9	Q93079	Q93079	Q93079	-0.52	4.73e-06	-0.646	2.29e-09	-0.335	2.1e-05	Nucleus	other
H2BC11	H2B clustered histone 11	P06899		P06899	-0.207	2.33e-05			-0.158	0.00157	Nucleus	other
H2BC12	H2B clustered histone 12	O60814	O60814	O60814	-0.52	4.73e-06	-0.646	2.29e-09	-0.335	2.1e-05	Nucleus	other
H2BC13	H2B clustered histone 13	Q99880	Q99880	Q99880	-0.52	4.73e-06	-0.646	2.29e-09	-0.335	2.1e-05	Nucleus	other
H2BC14	H2B clustered histone 14	Q99879	Q99879	Q99879	-0.52	4.73e-06	-0.646	2.29e-09	-0.335	2.1e-05	Nucleus	other
H2BC15	H2B clustered histone 15	Q99877	Q99877	Q99877	-0.52	4.73e-06	-0.646	2.29e-09	-0.335	2.1e-05	Nucleus	other
H2BC17	H2B clustered histone 17	P23527	P23527	P23527	-0.207	2.33e-05	-0.166	0.000343	-0.158	0.00157	Nucleus	other
H2BC18	H2B clustered histone 18	Q5QNW6	Q5QNW6	Q5QNW6	-0.52	4.73e-06	-0.646	2.29e-09	-0.335	2.1e-05	Nucleus	other
H2BC21	H2B clustered histone 21	Q16778	Q16778	Q16778	-0.207	2.33e-05	-0.166	0.000343	-0.158	0.00157	Nucleus	other
H2BC26	H2B clustered histone 26	Q8N257	Q8N257	Q8N257	-0.207	2.33e-05	-0.166	0.000343	-0.158	0.00157	Nucleus	other
H2BC12L	H2B clustered histone 12 like	P57053	P57053	P57053	-0.52	4.73e-06	-0.646	2.29e-09	-0.335	2.1e-05	Nucleus	other
H3-4	H3.4 histone, cluster member	Q16695			-0.289	3.42e-06					Nucleus	other
H6PD	hexose-6-phosphate dehydrogenase/glucose 1-dehydrogenase	O95479	O95479		0.263	0.0238	-0.727	3.25e-06			Cytoplasm	enzyme
HADH	hydroxyacyl-CoA dehydrogenase	Q16836	Q16836	Q16836	0.06	0.0487	0.126	0.000216	0.075	0.189	Cytoplasm	enzyme	unspecified application
HADHA	hydroxyacyl-CoA dehydrogenase trifunctional multienzyme complex subunit alpha	P40939	P40939	P40939	0.083	0.0121	0.074	0.026	0.18	0.00114	Cytoplasm	enzyme	unspecified application
HADHB	hydroxyacyl-CoA dehydrogenase trifunctional multienzyme complex subunit beta	P55084	P55084	P55084	0.078	0.0197	0.09	0.00612	0.207	0.000555	Cytoplasm	enzyme	unspecified application
HAGH	hydroxyacylglutathione hydrolase	Q16775	Q16775	Q16775	0.072	0.0529	0.057	0.0787	0.025	0.21	Cytoplasm	enzyme
HARS1	histidyl-tRNA synthetase 1	P12081			-0.026	0.364					Cytoplasm	enzyme
HBB	hemoglobin subunit beta	P68871	P68871	P68871	0.124	0.157	0.099	0.195	-0.24	0.0443	Cytoplasm	transporter		iron dextran,voxelotor
HBD	hemoglobin subunit delta	P02042	P02042	P02042	0.173	0.0855	0.081	0.192	-0.38	0.0023	Other	transporter
HBG1	hemoglobin subunit gamma 1			P69891					0.502	0.0369	Cytoplasm	other
HBG2	hemoglobin subunit gamma 2	P69892	P69892		-0.009	0.327	-0.061	0.354			Cytoplasm	other
HBQ1	hemoglobin subunit theta 1		P09105				-0.291	0.354			Other	other
HDDC2	HD domain containing 2	Q7Z4H3	Q7Z4H3		-0.163	0.0015	-0.619	2.26e-09			Cytoplasm	other
HDGF	heparin binding growth factor	P51858	P51858		-0.76	1.24e-05	-0.546	1.19e-07			Extracellular Space	growth factor
HDHD2	haloacid dehalogenase like hydrolase domain containing 2	Q9H0R4	Q9H0R4	Q9H0R4	-0.305	3.44e-05	-0.269	6.6e-07	-0.672	3.25e-14	Cytoplasm	other
HDHD5	haloacid dehalogenase like hydrolase domain containing 5	Q9BXW7	Q9BXW7	Q9BXW7	-0.036	0.176	-0.118	0.114	-0.104	0.000105	Cytoplasm	other
HEBP2	heme binding protein 2	Q9Y5Z4	Q9Y5Z4	Q9Y5Z4	0.038	0.107	0.071	0.136	-0.06	0.0206	Cytoplasm	other
HHATL	hedgehog acyltransferase like	Q9HCP6	Q9HCP6	Q9HCP6	-0.199	0.00027	-0.191	0.000156	-0.181	0.0066	Cytoplasm	enzyme
HIBADH	3-hydroxyisobutyrate dehydrogenase	P31937	P31937	P31937	-0.06	0.0683	-0.086	0.0258	-0.116	0.0143	Cytoplasm	enzyme
HIBCH	3-hydroxyisobutyryl-CoA hydrolase	Q6NVY1	Q6NVY1	Q6NVY1	0.08	0.2	0.048	0.253	-0.291	0.000416	Cytoplasm	enzyme
HIGD1A	HIG1 hypoxia inducible domain family member 1A	Q9Y241	Q9Y241		-0.072	0.117	-0.427	3.37e-09			Cytoplasm	other
HINT1	histidine triad nucleotide binding protein 1	P49773	P49773	P49773	-0.097	0.0192	-0.119	0.00248	-0.211	1.72e-07	Nucleus	enzyme	prognosis
HINT2	histidine triad nucleotide binding protein 2	Q9BX68	Q9BX68	Q9BX68	-0.164	0.0677	-0.314	1.27e-06	-0.471	1.13e-07	Cytoplasm	enzyme
HINT3	histidine triad nucleotide binding protein 3	Q9NQE9	Q9NQE9		-0.201	0.0193	-0.118	0.159			Cytoplasm	enzyme
HK1	hexokinase 1	P19367	P19367	P19367	-0.039	0.171	-0.019	0.242	-0.153	0.000312	Cytoplasm	kinase
HLA-A	major histocompatibility complex, class I, A			P04439					-0.955	8.25e-14	Plasma Membrane	other	efficacy,response to therapy	tebentafusp
HLA-B	major histocompatibility complex, class I, B	P01889			0.184	0.075					Plasma Membrane	transmembrane receptor	safety
HMBS	hydroxymethylbilane synthase	P08397	P08397	P08397	-0.323	0.00225	-0.14	0.04	-1.052	1.88e-11	Cytoplasm	enzyme
HMGB1	high mobility group box 1	P09429	P09429	P09429	-0.307	2.52e-05	-0.409	1.1e-06	-0.556	7.92e-07	Nucleus	transcription regulator	diagnosis
HMGN2	high mobility group nucleosomal binding domain 2	P05204			-0.668	4.96e-09					Nucleus	other
HNRNPA1	heterogeneous nuclear ribonucleoprotein A1	P09651	P09651	P09651	-0.021	0.336	-0.09	0.133	-0.203	0.000454	Nucleus	other
HNRNPA3	heterogeneous nuclear ribonucleoprotein A3	P51991	P51991		-0.588	1.69e-06	-0.57	4.68e-06			Nucleus	other
HNRNPA2B1	heterogeneous nuclear ribonucleoprotein A2/B1	P22626	P22626	P22626	-0.239	3.84e-05	-0.237	6.75e-05	-0.168	0.00942	Nucleus	other
HNRNPAB	heterogeneous nuclear ribonucleoprotein A/B	Q99729			-0.088	0.247					Nucleus	enzyme
HNRNPC	heterogeneous nuclear ribonucleoprotein C	P07910		P07910	0.115	0.207			-1.563	5.71e-11	Nucleus	other
HNRNPCL1/HNRNPCL2	heterogeneous nuclear ribonucleoprotein C like 2		B2RXH8				-1.003	1.43e-05			Nucleus	other
HNRNPCL3/HNRNPCL4	heterogeneous nuclear ribonucleoprotein C like 3		B7ZW38				-1.003	1.43e-05			Nucleus	other
HNRNPD	heterogeneous nuclear ribonucleoprotein D		Q14103				-0.862	4.31e-08			Nucleus	transcription regulator
HNRNPH1	heterogeneous nuclear ribonucleoprotein H1		P31943				-0.107	0.0631			Nucleus	other	diagnosis
HNRNPH2	heterogeneous nuclear ribonucleoprotein H2	P55795	P55795		-0.561	1.26e-07	-0.107	0.0631			Nucleus	other
HNRNPK	heterogeneous nuclear ribonucleoprotein K	P61978	P61978	P61978	-0.173	0.000359	-0.152	0.00193	-0.15	0.00747	Nucleus	other	prognosis
HNRNPM	heterogeneous nuclear ribonucleoprotein M	P52272	P52272		-0.286	0.000223	-0.357	0.00168			Nucleus	other
HNRNPU	heterogeneous nuclear ribonucleoprotein U	Q00839	Q00839	Q00839	-0.089	0.246	-0.437	0.00043	-0.413	8.28e-08	Nucleus	transporter	unspecified application
HOMER1	homer scaffold protein 1		Q86YM7				-0.195	0.0227			Plasma Membrane	other
HP	haptoglobin	P00738	P00738	P00738	0.376	0.0146	0.4	0.00962	0.15	0.151	Extracellular Space	peptidase	diagnosis,efficacy,unspecified application
HP1BP3	heterochromatin protein 1 binding protein 3	Q5SSJ5			-0.152	0.35					Nucleus	other
HPRT1	hypoxanthine phosphoribosyltransferase 1	P00492	P00492		-0.388	0.00141	-0.44	0.00241			Cytoplasm	enzyme		6-mercaptopurine,6-mercaptopurine/methotrexate,6-mercaptopurine/methotrexate/tretinoin,6-mercaptopurine/prednisone,6-mercaptopurine/prednisone/thioguanine,6-mercaptopurine/vincristine,azathioprine,cyclophosphamide/cytarabine/6-mercaptopurine,cytarabine/daunorubicin/thioguanine,cytarabine/thioguanine,dasatinib/6-mercaptopurine/methotrexate,daunorubicin/etoposide/6-mercaptopurine/mitoxantrone/predn…
HPX	hemopexin	P02790	P02790	P02790	0.253	0.000581	0.252	0.00129	0.19	0.00459	Extracellular Space	transporter	unspecified application
HRC	histidine rich calcium binding protein	P23327	P23327	P23327	-0.188	2.12e-06	-0.067	0.00724	-0.309	3.05e-08	Cytoplasm	other
HRG	histidine rich glycoprotein	P04196	P04196	P04196	0.367	0.00531	0.402	0.000503	0.086	0.117	Extracellular Space	other
HRNR	hornerin			Q86YZ3					-0.292	0.209	Cytoplasm	other
HSD17B4	hydroxysteroid 17-beta dehydrogenase 4	P51659			-0.862	4.7e-09					Cytoplasm	enzyme
HSD17B8	hydroxysteroid 17-beta dehydrogenase 8	Q92506	Q92506		0.192	0.0647	-0.004	0.242			Cytoplasm	enzyme
HSD17B10	hydroxysteroid 17-beta dehydrogenase 10	Q99714	Q99714	Q99714	-0.19	0.00059	-0.166	0.00245	-0.278	0.000893	Cytoplasm	enzyme
HSD17B12	hydroxysteroid 17-beta dehydrogenase 12	Q53GQ0	Q53GQ0	Q53GQ0	-0.758	3.23e-05	-0.422	7.44e-06	-0.877	1.82e-12	Cytoplasm	enzyme
HSDL1	hydroxysteroid dehydrogenase like 1	Q3SXM5		Q3SXM5	-0.316	0.00922			0.082	0.119	Cytoplasm	enzyme
HSDL2	hydroxysteroid dehydrogenase like 2	Q6YN16	Q6YN16	Q6YN16	-0.05	0.174	-0.067	0.152	0.113	0.117	Cytoplasm	transporter
HSP90AA1	heat shock protein 90 alpha family class A member 1	P07900	P07900	P07900	-0.008	0.293	-0.025	0.301	-0.165	0.00221	Cytoplasm	enzyme	safety,unspecified application	alvespimycin,cisplatin,luminespib,pimitespib,retaspimycin
HSP90AB1	heat shock protein 90 alpha family class B member 1	P08238	P08238	P08238	0.038	0.123	0.021	0.224	-0.074	0.0412	Cytoplasm	enzyme		alvespimycin,cisplatin,pimitespib,retaspimycin
HSP90B1	heat shock protein 90 beta family member 1	P14625	P14625		-0.664	1.49e-06	-0.609	3.08e-05			Cytoplasm	other		alvespimycin,cisplatin,retaspimycin
HSPA2	heat shock protein family A (Hsp70) member 2	P54652	P54652	P54652	0.105	0.034	0.099	0.0341	-0.118	0.0284	Cytoplasm	other
HSPA4	heat shock protein family A (Hsp70) member 4	P34932	P34932	P34932	-0.035	0.0874	-0.001	0.231	-0.268	0.00444	Cytoplasm	other	efficacy
HSPA5	heat shock protein family A (Hsp70) member 5	P11021	P11021	P11021	0.04	0.211	-0.019	0.137	-0.185	4.29e-05	Cytoplasm	enzyme	efficacy,unspecified application	PAT-SM6,SHetA2
HSPA8	heat shock protein family A (Hsp70) member 8	P11142	P11142	P11142	0.009	0.198	0.002	0.202	-0.052	0.00603	Cytoplasm	enzyme	diagnosis	SHetA2
HSPA9	heat shock protein family A (Hsp70) member 9	P38646	P38646	P38646	-0.063	0.124	-0.062	0.112	-0.137	0.00843	Cytoplasm	other		SHetA2
HSPA1A/HSPA1B	heat shock protein family A (Hsp70) member 1A	P0DMV8	P0DMV8	P0DMV8	-0.019	0.262	-0.001	0.3	-0.054	0.00586	Cytoplasm	enzyme	unspecified application
HSPB1	heat shock protein family B (small) member 1	P04792	P04792	P04792	-0.082	0.0247	-0.089	0.0342	-0.071	0.112	Cytoplasm	other	diagnosis,efficacy
HSPB2	heat shock protein family B (small) member 2	Q16082	Q16082	Q16082	-0.081	0.218	-0.069	0.227	-0.197	0.0183	Cytoplasm	other
HSPB3	heat shock protein family B (small) member 3	Q12988	Q12988	Q12988	-0.874	1.25e-06	-0.169	0.0597	-1.613	1.56e-10	Cytoplasm	other
HSPB6	heat shock protein family B (small) member 6	O14558	O14558	O14558	0.011	0.319	0.013	0.326	-0.079	0.0438	Cytoplasm	other
HSPB7	heat shock protein family B (small) member 7	Q9UBY9	Q9UBY9	Q9UBY9	-0.158	0.00022	-0.178	3.92e-05	-0.296	1.21e-11	Cytoplasm	other
HSPB8	heat shock protein family B (small) member 8	Q9UJY1	Q9UJY1	Q9UJY1	-0.084	0.00586	-0.125	0.0016	-0.108	0.00831	Cytoplasm	kinase
HSPD1	heat shock protein family D (Hsp60) member 1	P10809	P10809	P10809	0.057	0.0709	0.068	0.0355	0.053	0.308	Cytoplasm	enzyme	diagnosis,prognosis
HSPE1	heat shock protein family E (Hsp10) member 1	P61604	P61604	P61604	0.042	0.0942	0.023	0.231	-0.061	0.218	Cytoplasm	enzyme
HSPG2	heparan sulfate proteoglycan 2	P98160	P98160	P98160	-0.141	0.00156	-0.106	0.0118	-0.027	0.297	Extracellular Space	enzyme	unspecified application
IAH1	isoamyl acetate hydrolyzing esterase 1 (putative)	Q2TAA2	Q2TAA2	Q2TAA2	0.036	0.331	-0.128	0.0128	-0.637	5.45e-15	Cytoplasm	other
IARS2	isoleucyl-tRNA synthetase 2, mitochondrial	Q9NSE4	Q9NSE4	Q9NSE4	-0.166	0.000239	-0.131	0.0202	-0.419	1.44e-08	Cytoplasm	enzyme
IBA57	iron-sulfur cluster assembly factor IBA57		Q5T440				0.235	0.0639			Cytoplasm	other
IDE	insulin degrading enzyme	P14735			-0.015	0.345					Extracellular Space	peptidase		bacitracin
IDH1	isocitrate dehydrogenase (NADP(+)) 1	O75874	O75874	O75874	0.142	0.000266	0.146	0.00318	0.146	0.00398	Cytoplasm	enzyme	unspecified application	BAY1436032,DS-1001,HMPL-306,IDH1 inhibitor,IDH305,ivosidenib,KY100001,LY3410738,olutasidenib
IDH2	isocitrate dehydrogenase (NADP(+)) 2	P48735	P48735	P48735	0.012	0.296	0.011	0.313	-0.117	0.00359	Cytoplasm	enzyme	unspecified application	enasidenib,HMPL-306,SH1573,TQB3455
IDH3A	isocitrate dehydrogenase (NAD(+)) 3 catalytic subunit alpha	P50213	P50213	P50213	0.116	0.0533	0.132	0.0296	-0.201	9.12e-05	Cytoplasm	enzyme
IDH3B	isocitrate dehydrogenase (NAD(+)) 3 non-catalytic subunit beta	O43837	O43837	O43837	0.07	0.218	-0.05	0.0782	-0.192	0.00017	Cytoplasm	enzyme
IDH3G	isocitrate dehydrogenase (NAD(+)) 3 non-catalytic subunit gamma	P51553	P51553	P51553	0.018	0.0898	-0.101	0.0372	-0.192	0.0649	Cytoplasm	enzyme
IDI1	isopentenyl-diphosphate delta isomerase 1	Q13907	Q13907		0.108	0.147	-0.389	0.0443			Cytoplasm	enzyme
IDI2	isopentenyl-diphosphate delta isomerase 2	Q9BXS1	Q9BXS1	Q9BXS1	-0.014	0.345	0.057	0.181	0.08	0.164	Cytoplasm	enzyme
IGHA1	immunoglobulin heavy constant alpha 1	P01876	P01876	P01876	0.372	0.00281	0.398	0.00196	-0.201	0.0345	Extracellular Space	other
IGHA2	immunoglobulin heavy constant alpha 2 (A2m marker)		P01877				0.365	0.00321			Extracellular Space	other
IGHG1	immunoglobulin heavy constant gamma 1 (G1m marker)	P01857	P01857	P01857	0.235	0.00272	0.241	0.00312	-0.132	0.0374	Extracellular Space	other
IGHG2	immunoglobulin heavy constant gamma 2 (G2m marker)	P01859	P01859	P01859	0.076	0.215	0.11	0.146	0.067	0.222	Plasma Membrane	other
IGHG3	immunoglobulin heavy constant gamma 3 (G3m marker)	P01860	P01860	P01860	-0.019	0.351	-0.136	0.17	-0.822	4.65e-07	Extracellular Space	other
IGHG4	immunoglobulin heavy constant gamma 4 (G4m marker)	P01861	P01861	P01861	0.585	0.0327	0.611	0.0157	0.309	0.0321	Extracellular Space	other
IGHM	immunoglobulin heavy constant mu	P01871	P01871	P01871	0.123	0.203	0.155	0.174	-0.287	0.0647	Plasma Membrane	transmembrane receptor	unspecified application
IGHV3-7	immunoglobulin heavy variable 3-7		P01780	P01780			0.33	0.00876	0.054	0.346	Extracellular Space	other
IGHV3-23	immunoglobulin heavy variable 3-23			P01764					-1.032	2.11e-07	Extracellular Space	other
IGHV3-43	immunoglobulin heavy variable 3-43	A0A0B4J1X8			-0.157	0.0753					Other	other
IGHV3-49	immunoglobulin heavy variable 3-49	A0A0A0MS15			0.347	0.137					Other	other
IGHV3-74	immunoglobulin heavy variable 3-74	A0A0B4J1X5	A0A0B4J1X5		0.198	0.0128	0.188	0.0525			Other	other
IGKC	immunoglobulin kappa constant	P01834	P01834	P01834	0.16	0.0385	0.164	0.0386	-0.124	0.0462	Extracellular Space	other	unspecified application
IGKV3-20	immunoglobulin kappa variable 3-20	P01619		P01619	0.36	0.0583			-0.075	0.0132	Extracellular Space	other
IGLC2	immunoglobulin lambda constant 2		P0DOY2	P0DOY2			0.206	0.0389	-0.207	0.00413	Extracellular Space	other
IGLC3	immunoglobulin lambda constant 3 (Kern-Oz+ marker)		P0DOY3	P0DOY3			0.206	0.0389	-0.207	0.00413	Extracellular Space	other
IGLL1/IGLL5	immunoglobulin lambda like polypeptide 1	B9A064			0.297	0.00385					Plasma Membrane	other
ILK	integrin linked kinase	Q13418	Q13418	Q13418	-0.416	1e-06	-0.357	5.36e-05	-0.715	1.92e-08	Plasma Membrane	kinase		KP-SD-1,OSU-T315
IMMT	inner membrane mitochondrial protein	Q16891	Q16891	Q16891	-0.079	0.0247	-0.084	0.0289	-0.178	7.53e-05	Cytoplasm	other
IMPA1	inositol monophosphatase 1	P29218	P29218	P29218	-0.236	4.87e-05	-0.412	4.31e-06	-0.479	3.88e-12	Cytoplasm	phosphatase
IMPA2	inositol monophosphatase 2	O14732	O14732	O14732	-0.211	0.034	0.203	0.0144	-0.11	0.0232	Cytoplasm	phosphatase
IMPDH2	inosine monophosphate dehydrogenase 2		P12268				-0.45	0.00357			Cytoplasm	enzyme		6-mercaptopurine/prednisone/thioguanine,cytarabine/daunorubicin/thioguanine,cytarabine/thioguanine,IFNA2B/ribavirin,imatinib/thioguanine,interferon alfacon-1/ribavirin,methylprednisolone/mycophenolate mofetil,mycophenolate mofetil,mycophenolate mofetil/prednisone,mycophenolic acid,pegintron/ribavirin,ribavirin,thioguanine,VX-944
IPO5	importin 5	O00410	O00410	O00410	-0.054	0.265	-0.072	0.00633	-0.184	8.69e-07	Nucleus	transporter
IPO7	importin 7	O95373	O95373	O95373	-0.201	4.03e-06	0.01	0.277	-0.278	5.25e-05	Nucleus	transporter
ISOC1	isochorismatase domain containing 1	Q96CN7	Q96CN7		0.227	0.0963	-0.248	0.000173			Cytoplasm	enzyme	unspecified application
ISOC2	isochorismatase domain containing 2	Q96AB3	Q96AB3	Q96AB3	0.029	0.155	0.144	0.00619	-0.031	0.0648	Cytoplasm	enzyme
ITGB1	integrin subunit beta 1	P05556	P05556	P05556	-0.025	0.19	-0.03	0.228	0.12	0.199	Plasma Membrane	transmembrane receptor	disease progression,prognosis	OS2966
ITIH1	inter-alpha-trypsin inhibitor heavy chain 1		P19827				-0.055	0.299			Extracellular Space	other
ITIH2	inter-alpha-trypsin inhibitor heavy chain 2		P19823				0.27	0.0283			Extracellular Space	other
ITIH4	inter-alpha-trypsin inhibitor heavy chain 4	Q14624	Q14624		0.35	0.0156	0.136	0.334			Extracellular Space	other
JCHAIN	joining chain of multimeric IgA and IgM	P01591			0.402	0.0237					Extracellular Space	other
JPH1	junctophilin 1	Q9HDC5	Q9HDC5	Q9HDC5	-0.035	0.285	-0.063	0.0519	-0.01	0.0137	Plasma Membrane	other
JPH2	junctophilin 2	Q9BR39	Q9BR39	Q9BR39	-0.015	0.181	0.012	0.207	-0.029	0.304	Cytoplasm	enzyme
JSRP1	junctional sarcoplasmic reticulum protein 1	Q96MG2	Q96MG2	Q96MG2	-0.13	0.0169	-0.127	0.025	-0.05	0.192	Cytoplasm	other
KARS1	lysyl-tRNA synthetase 1	Q15046	Q15046	Q15046	0.037	0.308	-0.019	0.193	0.012	0.0514	Cytoplasm	enzyme	unspecified application
KLHL31	kelch like family member 31	Q9H511			-0.228	0.00133					Other	other
KLHL40	kelch like family member 40	Q2TBA0	Q2TBA0	Q2TBA0	-0.134	0.00551	-0.111	0.00436	-0.176	5.11e-05	Cytoplasm	other
KLHL41	kelch like family member 41	O60662	O60662	O60662	-0.089	0.000488	-0.088	0.000213	-0.03	0.115	Cytoplasm	other
KNG1	kininogen 1	P01042	P01042	P01042	0.244	0.0584	0.245	0.0201	-0.331	0.000131	Extracellular Space	other
KPNA1	karyopherin subunit alpha 1	P52294	P52294		-0.102	0.316	-0.303	0.075			Nucleus	transporter
KPNA3	karyopherin subunit alpha 3	O00505	O00505	O00505	-0.22	4.55e-05	-0.184	0.000123	-0.125	0.00394	Nucleus	transporter
KPNA4	karyopherin subunit alpha 4	O00629	O00629	O00629	-0.177	2.6e-06	-0.117	0.00395	-0.299	2.41e-08	Nucleus	other
KPNA6	karyopherin subunit alpha 6	O60684			-0.265	0.00142					Nucleus	other
KPNB1	karyopherin subunit beta 1	Q14974	Q14974	Q14974	-0.059	0.16	-0.071	0.129	-0.192	0.000312	Nucleus	other
KRT1	keratin 1	P04264	P04264	P04264	-0.661	0.0725	-0.528	0.0982	0.239	0.238	Cytoplasm	other	diagnosis
KRT2	keratin 2	P35908	P35908	P35908	-0.946	0.006	-1.428	2.08e-05	1.12	0.122	Cytoplasm	other		CIGB-300,silmitasertib
KRT5	keratin 5		P13647	P13647			-0.644	0.0326	0.366	0.19	Cytoplasm	other	diagnosis,efficacy,unspecified application
KRT9	keratin 9	P35527	P35527	P35527	-0.803	0.0782	-0.686	0.0938	0.006	0.346	Cytoplasm	other	diagnosis
KRT10	keratin 10	P13645	P13645	P13645	-0.383	0.0553	-0.445	0.0495	1.424	0.0465	Cytoplasm	other
KRT14	keratin 14			P02533					0.007	0.298	Cytoplasm	other	unspecified application
KRT17	keratin 17			Q04695					1.327	0.216	Cytoplasm	other	diagnosis,efficacy
KRT6A	keratin 6A	P02538		P02538	-0.789	0.00879			0.653	0.14	Cytoplasm	other	diagnosis
KRT6C	keratin 6C	P48668		P48668	-0.789	0.00879			0.653	0.14	Cytoplasm	other
L2HGDH	L-2-hydroxyglutarate dehydrogenase	Q9H9P8	Q9H9P8	Q9H9P8	-0.127	0.0183	-0.196	9.09e-05	-0.255	0.000105	Cytoplasm	enzyme
LACTB	lactamase beta	P83111	P83111	P83111	-0.059	0.154	0.003	0.0962	-0.102	0.0381	Cytoplasm	peptidase
LAMA2	laminin subunit alpha 2	P24043	P24043	P24043	-0.161	2.04e-06	-0.157	4.2e-05	-0.063	0.23	Extracellular Space	other
LAMB1	laminin subunit beta 1	P07942	P07942	P07942	-0.552	3.12e-09	-0.539	9.03e-11	-0.224	0.00729	Extracellular Space	other
LAMB2	laminin subunit beta 2	P55268	P55268	P55268	0.07	0.12	0.125	0.00839	0.002	0.346	Extracellular Space	enzyme
LAMC1	laminin subunit gamma 1	P11047	P11047	P11047	-0.176	4.18e-05	-0.149	0.000348	-0.055	0.17	Extracellular Space	other
LAMP2	lysosomal associated membrane protein 2	P13473	P13473		0.06	0.358	0.067	0.346			Plasma Membrane	other
LANCL1	LanC like glutathione S-transferase 1	O43813	O43813	O43813	0.037	0.173	-0.026	0.103	-0.058	0.00628	Plasma Membrane	enzyme
LAP3	leucine aminopeptidase 3	P28838	P28838	P28838	-0.251	0.000446	-0.184	0.000887	-0.149	0.00031	Cytoplasm	peptidase	safety
LDB3	LIM domain binding 3	O75112	O75112	O75112	-0.065	0.00148	-0.057	0.00303	0.023	0.185	Cytoplasm	transporter
LDHA	lactate dehydrogenase A	P00338	P00338	P00338	0.096	0.133	0.086	0.138	0.033	0.29	Cytoplasm	enzyme	efficacy,unspecified application	nedosiran
LDHB	lactate dehydrogenase B	P07195	P07195	P07195	-0.463	2e-05	-0.483	8.54e-06	-0.498	5.5e-06	Cytoplasm	enzyme	unspecified application
LDHD	lactate dehydrogenase D	Q86WU2			-0.454	2.04e-06					Cytoplasm	enzyme
LETM1	leucine zipper and EF-hand containing transmembrane protein 1	O95202	O95202		-0.325	0.0712	0.034	0.0678			Cytoplasm	transporter
LGALS1	galectin 1	P09382	P09382	P09382	0.163	0.0128	0.144	0.0318	0.164	0.0281	Extracellular Space	other	diagnosis,prognosis	OTX008
LIMCH1	LIM and calponin homology domains 1		Q9UPQ0	Q9UPQ0			-0.085	0.288	-0.665	1.99e-07	Cytoplasm	other
LMAN1	lectin, mannose binding 1	P49257			-0.136	0.131					Cytoplasm	other
LMCD1	LIM and cysteine rich domains 1	Q9NZU5	Q9NZU5	Q9NZU5	-0.093	0.0757	-0.109	0.0187	-0.1	0.028	Cytoplasm	transcription regulator	unspecified application
LMNA	lamin A/C	P02545	P02545	P02545	-0.171	0.00102	-0.149	0.0108	-0.081	0.125	Nucleus	other
LMNB2	lamin B2	Q03252	Q03252		-0.009	0.178	0.047	0.274			Nucleus	other
LMOD2	leiomodin 2		Q6P5Q4				-0.622	7.1e-06			Other	other
LMOD3	leiomodin 3	Q0VAK6	Q0VAK6	Q0VAK6	-0.214	7.43e-05	-0.24	1.43e-05	-0.311	2.74e-05	Cytoplasm	other
LNPK	lunapark, ER junction formation factor	Q9C0E8			0.072	0.363					Cytoplasm	other
LONP1	lon peptidase 1, mitochondrial	P36776	P36776	P36776	-0.161	0.000336	-0.155	0.00214	-1.54	2.38e-20	Cytoplasm	peptidase
LRG1	leucine rich alpha-2-glycoprotein 1		P02750				0.259	0.265			Extracellular Space	other
LRPPRC	leucine rich pentatricopeptide repeat containing	P42704	P42704	P42704	-0.129	0.00849	-0.111	0.00957	-0.098	0.0227	Cytoplasm	other
LRRC2	leucine rich repeat containing 2	Q9BYS8			-0.028	0.285					Other	other
LRRC20	leucine rich repeat containing 20	Q8TCA0	Q8TCA0	Q8TCA0	0.028	0.33	0.042	0.131	-0.115	0.00251	Other	other
LRRC39	leucine rich repeat containing 39	Q96DD0	Q96DD0		0.095	0.351	0.124	0.0451			Other	other
LRRC47	leucine rich repeat containing 47	Q8N1G4	Q8N1G4	Q8N1G4	-0.026	0.35	-0.131	0.0407	-0.227	0.000139	Other	other
LSS	lanosterol synthase		P48449				0.361	0.112			Cytoplasm	enzyme		oxiconazole
LTA4H	leukotriene A4 hydrolase	P09960	P09960	P09960	0.099	0.0265	0.023	0.275	-0.503	9.32e-12	Cytoplasm	enzyme
LUM	lumican	P51884	P51884	P51884	-0.545	0.0173	-0.549	0.00939	-0.17	0.191	Extracellular Space	other
LYPLA1	lysophospholipase 1	O75608	O75608	O75608	-0.026	0.116	0.02	0.195	-0.33	3.51e-10	Cytoplasm	enzyme
LYPLA2	lysophospholipase 2	O95372			-0.295	0.122					Cytoplasm	enzyme
LYRM7	LYR motif containing 7	Q5U5X0	Q5U5X0		0.115	0.327	-0.415	5.76e-06			Cytoplasm	other
LYST	lysosomal trafficking regulator	Q99698			-0.537	7.72e-06					Cytoplasm	transporter
MACROD1	mono-ADP ribosylhydrolase 1	Q9BQ69	Q9BQ69	Q9BQ69	-0.02	0.108	-0.033	0.0332	-0.062	0.00552	Cytoplasm	enzyme
MACROH2A1	macroH2A.1 histone	O75367	O75367	O75367	-0.365	2.44e-08	-0.491	1.85e-08	-0.332	5.67e-09	Nucleus	other
MAN2C1	mannosidase alpha class 2C member 1		Q9NTJ4				-0.3	0.000221			Cytoplasm	enzyme
MAOA	monoamine oxidase A	P21397			-0.323	6.24e-05					Cytoplasm	enzyme		benzphetamine,CX-1370,dextroamphetamine,fenfluramine/phentermine,iproniazid,isocarboxazid,ladostigil,MAO-A inhibitor,methamphetamine,moclobemide,N-(2-indanyl)glycinamide,phenelzine,phentermine,phentermine/topiramate,procainamide,tranylcypromine
MAOB	monoamine oxidase B	P27338	P27338	P27338	-0.057	0.106	-0.008	0.171	-0.134	0.0335	Cytoplasm	enzyme		benzphetamine,dextroamphetamine,fenfluramine/phentermine,isocarboxazid,ladostigil,levodopa/rasagiline,MAO-B inhibitor,methamphetamine,pargyline,phenelzine,phentermine,phentermine/topiramate,procainamide,rasagiline,safinamide,selegiline,tranylcypromine
MAP4	microtubule associated protein 4	P27816	P27816	P27816	-0.242	9.35e-05	-0.218	0.000236	-0.184	0.0094	Cytoplasm	other	efficacy
MAP2K1	mitogen-activated protein kinase kinase 1	Q02750	Q02750	Q02750	-0.519	1.19e-08	-0.08	0.0614	-0.149	0.0345	Cytoplasm	kinase		ARRY-424704,AS703988,binimetinib,binimetinib/cetuximab/encorafenib,binimetinib/encorafenib,binimetinib/encorafenib/panitumumab,binimetinib/vemurafenib,cetuximab/dabrafenib/trametinib,cobimetinib,cobimetinib/dabrafenib,cobimetinib/vemurafenib,dabrafenib/pembrolizumab/trametinib,dabrafenib/trametinib,dabrafenib/trametinib/vemurafenib,docetaxel/selumetinib,E 6201,FCN-159,mirdametinib,MKK1 inhibitor,…
MAP2K2	mitogen-activated protein kinase kinase 2	P36507			-0.048	0.318					Cytoplasm	kinase		AS703988,binimetinib,binimetinib/cetuximab/encorafenib,binimetinib/encorafenib,binimetinib/encorafenib/panitumumab,binimetinib/vemurafenib,cetuximab/dabrafenib/trametinib,cobimetinib,dabrafenib/pembrolizumab/trametinib,dabrafenib/trametinib,dabrafenib/trametinib/vemurafenib,docetaxel/selumetinib,FCN-159,mirdametinib,PD184352,PD318088,pimasertib,RO4927350,selumetinib,SM1-71,TAK 733,trametinib,tram…
MAP2K3	mitogen-activated protein kinase kinase 3	P46734	P46734	P46734	-0.108	0.159	-0.314	2.94e-05	-0.527	7.55e-11	Cytoplasm	kinase
MAP2K6	mitogen-activated protein kinase kinase 6	P52564	P52564	P52564	0.056	0.113	0.132	0.00275	0.139	0.0346	Cytoplasm	kinase	prognosis
MAP3K20	mitogen-activated protein kinase kinase kinase 20	Q9NYL2	Q9NYL2	Q9NYL2	-0.142	0.00129	0.022	0.0492	-0.369	5.51e-12	Cytoplasm	kinase
MAPK1	mitogen-activated protein kinase 1	P28482	P28482		-1.018	4.15e-11	-1.273	1.68e-10			Cytoplasm	kinase	efficacy	(5Z)-3-(2-aminoethyl)-5-[(4-phenylmethoxyphenyl)methylidene]-1,3-thiazolidine-2,4-dione,(5Z)-3-(2-aminoethyl)-5-[[4-(2-methylpropoxy)phenyl]methylidene]-1,3-thiazolidine-2,4-dione,(Z)-3-(2-aminoethyl)-5-(4-ethoxybenzylidene)thiazolidine-2,4-dione,ASN007,ASTX029,ATG-017,binimetinib,CAY10561,FR 180204,HE3286,HH2710,JSI-1187,KO-947,LY-3007113,MAP kinase1 inhibitor,pexmetinib,rineterkib,SM1-71,temute…
MAPK12	mitogen-activated protein kinase 12	P53778	P53778		-0.408	0.000905	-0.621	2.65e-07			Cytoplasm	kinase		talmapimod
MAPK14	mitogen-activated protein kinase 14	Q16539	Q16539		-0.661	5.95e-10	-0.11	0.0296			Cytoplasm	kinase	efficacy	AMG 2372,ARRY-371797,CGH2466,Org 48762-0,p38 MAP kinase inhibitor,p38 MAP kinase inhibitor IV,pamapimod,PH-797804,ralimetinib,RO-3201195,Sb202190,talmapimod,UM101
MAPRE2	microtubule associated protein RP/EB family member 2	Q15555	Q15555		-0.312	2.24e-06	-0.263	1.64e-05			Cytoplasm	other
MAPT	microtubule associated protein tau	P10636	P10636	P10636	0.076	0.0891	-0.363	1.99e-05	-0.361	1.27e-07	Plasma Membrane	other	diagnosis,efficacy,unspecified application	gosuranemab
MARCKS	myristoylated alanine rich protein kinase C substrate	P29966			-0.194	0.275					Plasma Membrane	other		BIO-11006
MAT2A	methionine adenosyltransferase 2A		P31153				-0.102	0.295			Cytoplasm	enzyme		AG-270,IDE397
MATR3	matrin 3	P43243	P43243	P43243	-0.567	1.88e-08	-0.468	7.47e-06	-0.51	9.61e-07	Nucleus	other
MAVS	mitochondrial antiviral signaling protein	Q7Z434	Q7Z434		-0.245	0.000923	-0.062	0.188			Cytoplasm	other
MB	myoglobin	P02144	P02144	P02144	-0.027	0.202	-0.022	0.134	-0.028	0.161	Cytoplasm	transporter	diagnosis,safety,unspecified application
MCCC1	methylcrotonyl-CoA carboxylase subunit 1	Q96RQ3	Q96RQ3		0.183	0.0546	0.531	5.04e-05			Cytoplasm	enzyme
MCCC2	methylcrotonyl-CoA carboxylase subunit 2	Q9HCC0	Q9HCC0		-0.31	0.0367	-0.523	2.86e-07			Cytoplasm	enzyme
MCEE	methylmalonyl-CoA epimerase	Q96PE7	Q96PE7		0.075	0.225	-0.547	0.000291			Cytoplasm	enzyme
MCTS1	MCTS1 re-initiation and release factor	Q9ULC4	Q9ULC4	Q9ULC4	-0.136	0.000846	-0.184	2.81e-05	0.035	0.238	Cytoplasm	other
MCU	mitochondrial calcium uniporter	Q8NE86	Q8NE86	Q8NE86	0.009	0.29	-0.114	0.057	0.149	0.126	Cytoplasm	ion channel
MDH1	malate dehydrogenase 1	P40925	P40925	P40925	-0.082	0.00557	-0.085	0.00794	-0.137	0.000129	Cytoplasm	enzyme
MDH2	malate dehydrogenase 2	P40926	P40926	P40926	-0.005	0.323	0	0.293	-0.042	0.107	Cytoplasm	enzyme
ME1	malic enzyme 1	P48163	P48163	P48163	0.07	0.00403	-0.022	0.331	-0.207	0.00854	Cytoplasm	enzyme
ME2	malic enzyme 2	P23368	P23368	P23368	0.251	0.223	-0.265	0.0911	0.027	0.304	Cytoplasm	enzyme
MECR	mitochondrial trans-2-enoyl-CoA reductase	Q9BV79	Q9BV79	Q9BV79	-0.543	0.000155	-0.181	0.00671	-0.752	1.24e-13	Cytoplasm	enzyme
METTL26	methyltransferase like 26	Q96S19			0.104	0.111					Other	other
MFAP5	microfibril associated protein 5	Q13361			-0.889	0.000356					Extracellular Space	other
MGST2	microsomal glutathione S-transferase 2	Q99735	Q99735		-0.112	0.33	-0.11	0.159			Cytoplasm	enzyme
MGST3	microsomal glutathione S-transferase 3	O14880	O14880	O14880	0.005	0.326	-0.029	0.141	-0.283	2.9e-07	Cytoplasm	enzyme
MICOS10	mitochondrial contact site and cristae organizing system subunit 10			Q5TGZ0					0.084	0.271	Cytoplasm	other
MICOS13	mitochondrial contact site and cristae organizing system subunit 13	Q5XKP0	Q5XKP0	Q5XKP0	-0.232	0.00306	-0.522	3.16e-13	-0.207	0.0895	Cytoplasm	other
MIF	macrophage migration inhibitory factor	P14174	P14174	P14174	-0.171	0.00147	-0.178	0.00217	-0.32	1.82e-10	Extracellular Space	cytokine	diagnosis,prognosis,response to therapy	imalumab
MLEC	malectin	Q14165	Q14165		-0.624	4.12e-05	-0.476	0.0303			Plasma Membrane	other
MLIP	muscular LMNA interacting protein	Q5VWP3	Q5VWP3	Q5VWP3	-0.263	0.000359	-0.378	7.46e-05	-0.727	1.88e-13	Nucleus	transcription regulator
MPC1	mitochondrial pyruvate carrier 1	Q9Y5U8	Q9Y5U8	Q9Y5U8	0.043	0.274	-0.142	0.125	-0.221	0.00198	Cytoplasm	transporter
MPC2	mitochondrial pyruvate carrier 2	O95563	O95563	O95563	-0.091	0.176	-0.091	0.155	-0.151	0.0099	Plasma Membrane	transporter
MPI	mannose phosphate isomerase	P34949	P34949	P34949	0.023	0.351	-0.116	0.0115	-0.46	3.43e-14	Cytoplasm	enzyme
MPST	mercaptopyruvate sulfurtransferase	P25325	P25325	P25325	-0.395	1.16e-05	-0.12	0.14	-0.287	0.0992	Cytoplasm	enzyme
MRPL38	mitochondrial ribosomal protein L38		Q96DV4				0.038	0.0259			Cytoplasm	other
MRPL44	mitochondrial ribosomal protein L44	Q9H9J2			-0.017	0.354					Cytoplasm	enzyme
MRPL47	mitochondrial ribosomal protein L47			Q9HD33					-1.002	1.69e-13	Cytoplasm	other
MRPS5	mitochondrial ribosomal protein S5	P82675			-0.226	0.0284					Cytoplasm	other
MRPS9	mitochondrial ribosomal protein S9	P82933			-0.112	0.255					Cytoplasm	other
MRPS27	mitochondrial ribosomal protein S27		Q92552				-0.588	0.146			Cytoplasm	other
MRPS34	mitochondrial ribosomal protein S34	P82930			0.069	0.0452					Cytoplasm	other
MRPS36	mitochondrial ribosomal protein S36	P82909	P82909	P82909	-0.047	0.194	-0.32	0.000803	0.054	0.19	Cytoplasm	other
MSN	moesin	P26038	P26038	P26038	-0.552	9.01e-08	-0.665	1.78e-06	-0.188	0.0182	Plasma Membrane	other
MT-ATP8	ATP synthase F0 subunit 8	P03928	P03928	P03928	-0.467	0.000162	-0.337	0.00111	-0.364	0.000528	Cytoplasm	enzyme
MT-CO1	cytochrome c oxidase subunit I	P00395	P00395	P00395	-0.071	0.128	-0.008	0.337	-0.264	0.00067	Cytoplasm	enzyme		acetaminophen/ibuprofen,chlorpheniramine/ibuprofen/phenylephrine,esomeprazole/naproxen,famotidine/ibuprofen,hydrocodone/ibuprofen,ibuprofen,ibuprofen/phenylephrine,indomethacin,naproxen,naproxen/sumatriptan,oxaprozin
MT-CO2	cytochrome c oxidase subunit II			YP_003024029					-0.231	2.99e-06	Cytoplasm	enzyme		esomeprazole/naproxen,indomethacin,naproxen,naproxen/sumatriptan,oxaprozin
MT-CO3	cytochrome c oxidase subunit III	P00414		P00414	-0.166	0.0394			-0.448	9.43e-07	Cytoplasm	enzyme
MT-CYB	cytochrome b	P00156			0.094	0.0394					Cytoplasm	enzyme		atovaquone,atovaquone/proguanil
MT-ND1	NADH dehydrogenase subunit 1	P03886	P03886	P03886	-0.044	0.0802	0.044	0.223	-0.056	0.0499	Cytoplasm	enzyme	unspecified application
MT-ND2	NADH dehydrogenase subunit 2		P03891	P03891			-0.641	1.37e-05	0.04	0.0977	Cytoplasm	enzyme	unspecified application
MT-ND4	NADH dehydrogenase subunit 4	P03905	P03905	P03905	0.012	0.264	-0.014	0.353	0.079	0.0604	Cytoplasm	enzyme	unspecified application
MT-ND5	NADH dehydrogenase subunit 5	P03915	P03915	P03915	-0.11	0.0478	0.006	0.325	-0.32	6.83e-06	Cytoplasm	enzyme	unspecified application
MTARC2	mitochondrial amidoxime reducing component 2	Q969Z3	Q969Z3		-0.373	2.59e-08	-0.049	0.286			Cytoplasm	enzyme
MTCH2	mitochondrial carrier 2	Q9Y6C9	Q9Y6C9	Q9Y6C9	-0.011	0.289	0.072	0.0676	-0.051	0.0857	Cytoplasm	other
MTHFD1	methylenetetrahydrofolate dehydrogenase, cyclohydrolase and formyltetrahydrofolate synthetase 1	P11586	P11586	P11586	-0.168	0.0131	-0.15	0.0261	-0.243	0.000635	Cytoplasm	enzyme
MTPN	myotrophin	P58546	P58546	P58546	0.026	0.28	-0.152	0.000535	-0.523	1.18e-09	Nucleus	transcription regulator
MTX2	metaxin 2	O75431	O75431	O75431	-0.198	8.44e-05	-0.436	5.55e-06	-0.339	0.000119	Cytoplasm	transporter
MUSTN1	musculoskeletal, embryonic nuclear protein 1	Q8IVN3	Q8IVN3	Q8IVN3	-0.281	0.000233	-0.151	0.028	-0.263	0.000168	Nucleus	other
MYBPC1	myosin binding protein C1	Q00872	Q00872	Q00872	-0.033	0.0687	-0.027	0.119	0.024	0.196	Cytoplasm	other
MYBPC2	myosin binding protein C2	Q14324	Q14324	Q14324	0.148	0.037	0.15	0.0297	0.082	0.158	Cytoplasm	other
MYBPH	myosin binding protein H	Q13203	Q13203	Q13203	-1.403	4.86e-06	-2.243	1.85e-08	-1.133	0.000155	Cytoplasm	other
MYH1	myosin heavy chain 1	P12882	P12882	P12882	0	0.35	0.019	0.291	0.017	0.338	Plasma Membrane	enzyme
MYH2	myosin heavy chain 2	Q9UKX2	Q9UKX2	Q9UKX2	0.007	0.324	0.017	0.307	-0.036	0.126	Cytoplasm	enzyme
MYH3	myosin heavy chain 3	P11055	P11055	P11055	-0.003	0.248	-0.095	0.0878	0.176	0.205	Cytoplasm	enzyme
MYH4	myosin heavy chain 4	Q9Y623	Q9Y623	Q9Y623	-0.096	0.128	0	0.339	0.024	0.105	Cytoplasm	enzyme
MYH6	myosin heavy chain 6	P13533	P13533	P13533	-0.072	0.279	-0.069	0.3	0.132	0.134	Cytoplasm	enzyme
MYH7	myosin heavy chain 7	P12883	P12883	P12883	-0.02	0.342	-0.02	0.322	0.063	0.144	Cytoplasm	enzyme	unspecified application
MYH8	myosin heavy chain 8	P13535	P13535	P13535	-0.02	0.316	0.038	0.25	-0.04	0.157	Cytoplasm	enzyme
MYH9	myosin heavy chain 9	P35579	P35579	P35579	-0.234	0.0047	-0.322	0.00188	-0.038	0.125	Cytoplasm	enzyme	unspecified application
MYH11	myosin heavy chain 11	P35749	P35749	P35749	-0.449	5.52e-05	-0.733	1.21e-06	0.053	0.295	Cytoplasm	other
MYH13	myosin heavy chain 13	Q9UKX3	Q9UKX3	Q9UKX3	-0.003	0.297	0.006	0.271	0.061	0.336	Cytoplasm	other
MYH14	myosin heavy chain 14	Q7Z406	Q7Z406		-0.247	0.000122	-0.199	0.0148			Extracellular Space	enzyme		mavacamten
MYH15	myosin heavy chain 15			Q9Y2K3					0.244	0.347	Extracellular Space	other
MYH7B	myosin heavy chain 7B		A7E2Y1	A7E2Y1			-0.011	0.275	-0.228	0.221	Cytoplasm	other	unspecified application
MYL1	myosin light chain 1	P05976	P05976	P05976	-0.027	0.26	-0.055	0.15	-0.103	0.00307	Cytoplasm	other
MYL2	myosin light chain 2	P10916	P10916	P10916	-0.064	0.244	-0.049	0.257	0.02	0.203	Cytoplasm	other	diagnosis
MYL3	myosin light chain 3	P08590	P08590	P08590	-0.077	0.192	-0.072	0.184	0.054	0.245	Cytoplasm	other
MYL4	myosin light chain 4	P12829	P12829	P12829	-0.034	0.35	0.034	0.102	-0.244	8.89e-14	Cytoplasm	other
MYL6	myosin light chain 6	P60660	P60660	P60660	-0.544	3.77e-05	-0.664	1.5e-06	-0.053	0.24	Cytoplasm	enzyme
MYL9	myosin light chain 9	P24844		P24844	-0.763	6.32e-07			0.005	0.319	Cytoplasm	other
MYL11	myosin light chain 11	Q96A32	Q96A32	Q96A32	-0.002	0.36	-0.007	0.351	-0.05	0.0892	Cytoplasm	other
MYL12A	myosin light chain 12A	P19105	P19105	P19105	-0.448	1.76e-07	-0.406	1.58e-07	-0.056	0.32	Cytoplasm	other	unspecified application
MYL12B	myosin light chain 12B	O14950	O14950		-0.448	1.76e-07	-0.406	1.58e-07			Cytoplasm	other
MYL6B	myosin light chain 6B	P14649	P14649	P14649	-0.575	3.61e-07	-0.58	2.7e-07	-0.461	1.17e-05	Cytoplasm	other
MYLK2	myosin light chain kinase 2	Q9H1R3	Q9H1R3	Q9H1R3	-0.19	0.00849	-0.226	0.00204	0.092	0.214	Cytoplasm	kinase
MYO18A	myosin XVIIIA	Q92614	Q92614		-0.142	0.195	-0.1	0.0353			Cytoplasm	other
MYO1C	myosin IC	O00159	O00159		0.005	0.336	-0.014	0.272			Cytoplasm	enzyme
MYOM1	myomesin 1	P52179	P52179	P52179	0.007	0.251	0.005	0.246	0.058	0.00248	Cytoplasm	other
MYOM2	myomesin 2	P54296	P54296	P54296	0.06	0.000485	0.057	0.000887	0.064	0.00313	Cytoplasm	other	unspecified application
MYOM3	myomesin 3	Q5VTT5	Q5VTT5	Q5VTT5	-0.075	0.0354	-0.083	0.0125	-0.034	0.117	Other	other
MYOT	myotilin	Q9UBF9	Q9UBF9	Q9UBF9	0.004	0.254	0.019	0.162	-0.072	0.0129	Cytoplasm	other
MYOZ1	myozenin 1	Q9NP98	Q9NP98	Q9NP98	-0.01	0.349	-0.006	0.184	-0.013	0.114	Cytoplasm	other
MYOZ2	myozenin 2	Q9NPC6	Q9NPC6	Q9NPC6	-0.071	0.213	-0.094	0.181	0.098	0.126	Cytoplasm	other	unspecified application
MYOZ3	myozenin 3	Q8TDC0	Q8TDC0	Q8TDC0	0.029	0.34	-0.021	0.118	0.018	0.32	Cytoplasm	other
MYPN	myopalladin	Q86TC9	Q86TC9	Q86TC9	-0.115	0.00307	-0.042	0.162	-0.174	2.38e-06	Cytoplasm	other
NACA	nascent polypeptide associated complex subunit alpha	E9PAV3	E9PAV3	E9PAV3	-0.036	0.344	-0.056	0.119	-0.089	0.0777	Cytoplasm	transcription regulator
NAMPT	nicotinamide phosphoribosyltransferase	P43490			0.007	0.0886					Extracellular Space	cytokine	diagnosis,prognosis	daporinad,KPT-9274,OT-82,STF-118804
NAP1L4	nucleosome assembly protein 1 like 4	Q99733	Q99733	Q99733	-0.25	2.15e-07	-0.009	0.275	-0.228	2.26e-09	Cytoplasm	other	unspecified application
NAPA	NSF attachment protein alpha	P54920	P54920	P54920	-0.092	0.00294	-0.038	0.301	-0.301	4.5e-06	Cytoplasm	transporter
NAPRT	nicotinate phosphoribosyltransferase	Q6XQN6			-0.417	0.0497					Cytoplasm	enzyme
NARS1	asparaginyl-tRNA synthetase 1	O43776	O43776		-0.127	0.245	0.03	0.343			Cytoplasm	enzyme
NAXD	NAD(P)HX dehydratase	Q8IW45	Q8IW45		-0.466	2.21e-08	-0.656	2.79e-10			Cytoplasm	enzyme
NAXE	NAD(P)HX epimerase	Q8NCW5	Q8NCW5	Q8NCW5	-0.044	0.188	-0.16	0.00204	-0.055	0.0263	Extracellular Space	enzyme
NCL	nucleolin	P19338	P19338	P19338	0.074	0.0329	-0.368	0.000135	0.209	0.0369	Nucleus	other		AGRO 100,IPP-204106N
NDRG2	NDRG family member 2	Q9UN36	Q9UN36	Q9UN36	0.026	0.166	0.04	0.0646	-0.144	0.00131	Cytoplasm	other
NDUFA2	NADH:ubiquinone oxidoreductase subunit A2	O43678	O43678	O43678	0.053	0.0841	-0.006	0.295	0.03	0.169	Cytoplasm	enzyme
NDUFA3	NADH:ubiquinone oxidoreductase subunit A3	O95167	O95167	O95167	-0.068	0.124	-0.001	0.3	-0.115	0.131	Cytoplasm	enzyme
NDUFA4	NDUFA4 mitochondrial complex associated	O00483	O00483	O00483	-0.058	0.0873	0.008	0.322	-0.059	0.02	Cytoplasm	enzyme
NDUFA5	NADH:ubiquinone oxidoreductase subunit A5	Q16718	Q16718	Q16718	0.063	0.0444	0.079	0.0134	-0.1	0.0107	Cytoplasm	enzyme
NDUFA6	NADH:ubiquinone oxidoreductase subunit A6	P56556	P56556	P56556	-0.049	0.292	-0.06	0.231	-0.003	0.302	Cytoplasm	enzyme
NDUFA7	NADH:ubiquinone oxidoreductase subunit A7	O95182	O95182	O95182	0.08	0.179	0.06	0.265	0.073	0.211	Cytoplasm	enzyme
NDUFA8	NADH:ubiquinone oxidoreductase subunit A8	P51970	P51970	P51970	0.086	0.177	0.096	0.0821	-0.02	0.145	Cytoplasm	enzyme
NDUFA9	NADH:ubiquinone oxidoreductase subunit A9	Q16795	Q16795	Q16795	0.123	0.0248	0.149	0.0112	-0.01	0.255	Cytoplasm	enzyme
NDUFA10	NADH:ubiquinone oxidoreductase subunit A10	O95299	O95299	O95299	0.069	0.0978	0.073	0.094	0.063	0.155	Cytoplasm	transporter
NDUFA11	NADH:ubiquinone oxidoreductase subunit A11	Q86Y39	Q86Y39	Q86Y39	0.012	0.285	0.023	0.246	-0.155	0.0319	Cytoplasm	enzyme
NDUFA12	NADH:ubiquinone oxidoreductase subunit A12	Q9UI09	Q9UI09	Q9UI09	0.122	0.0626	0.159	0.0428	0.1	0.169	Cytoplasm	enzyme
NDUFA13	NADH:ubiquinone oxidoreductase subunit A13	Q9P0J0	Q9P0J0	Q9P0J0	0.069	0.0839	0.03	0.274	-0.002	0.131	Cytoplasm	enzyme
NDUFAB1	NADH:ubiquinone oxidoreductase subunit AB1	O14561	O14561	O14561	0.099	0.0363	-0.071	0.0322	-0.055	0.0105	Cytoplasm	enzyme
NDUFAF4	NADH:ubiquinone oxidoreductase complex assembly factor 4	Q9P032			-0.363	0.000972					Cytoplasm	other
NDUFB1	NADH:ubiquinone oxidoreductase subunit B1	O75438	O75438	O75438	0.134	0.00408	0.164	0.00411	-0.108	0.0187	Cytoplasm	enzyme
NDUFB3	NADH:ubiquinone oxidoreductase subunit B3	O43676	O43676	O43676	-0.351	0.00752	0.137	0.0795	0.054	0.264	Cytoplasm	enzyme
NDUFB4	NADH:ubiquinone oxidoreductase subunit B4	O95168	O95168		0.135	0.149	0.223	0.0228			Cytoplasm	transporter
NDUFB5	NADH:ubiquinone oxidoreductase subunit B5	O43674	O43674	O43674	0.104	0.0966	-0.013	0.273	-0.085	0.0326	Cytoplasm	enzyme
NDUFB6	NADH:ubiquinone oxidoreductase subunit B6	O95139	O95139		0.031	0.32	0.062	0.279			Cytoplasm	enzyme
NDUFB7	NADH:ubiquinone oxidoreductase subunit B7	P17568	P17568	P17568	0.133	0.0157	0.085	0.172	0.079	0.057	Cytoplasm	enzyme
NDUFB8	NADH:ubiquinone oxidoreductase subunit B8	O95169	O95169	O95169	0.01	0.334	0.103	0.026	-0.065	0.199	Cytoplasm	enzyme
NDUFB9	NADH:ubiquinone oxidoreductase subunit B9	Q9Y6M9	Q9Y6M9	Q9Y6M9	0.13	0.0124	0.081	0.075	0.023	0.287	Cytoplasm	enzyme
NDUFB10	NADH:ubiquinone oxidoreductase subunit B10	O96000	O96000	O96000	0.067	0.162	0.074	0.131	-0.041	0.0848	Cytoplasm	enzyme
NDUFB11	NADH:ubiquinone oxidoreductase subunit B11	Q9NX14	Q9NX14	Q9NX14	-0.036	0.191	0.104	0.027	-0.084	0.237	Cytoplasm	enzyme
NDUFC2	NADH:ubiquinone oxidoreductase subunit C2	O95298	O95298	O95298	0.114	0.0166	0.069	0.0202	-0.159	0.0159	Cytoplasm	enzyme
NDUFS1	NADH:ubiquinone oxidoreductase core subunit S1	P28331	P28331	P28331	0.082	0.0741	0.118	0.0277	0.076	0.113	Cytoplasm	enzyme
NDUFS2	NADH:ubiquinone oxidoreductase core subunit S2	O75306	O75306	O75306	0.061	0.185	0.106	0.0458	0.07	0.264	Cytoplasm	enzyme
NDUFS3	NADH:ubiquinone oxidoreductase core subunit S3	O75489	O75489	O75489	0.099	0.0335	0.07	0.107	0.026	0.349	Cytoplasm	enzyme
NDUFS4	NADH:ubiquinone oxidoreductase subunit S4	O43181	O43181	O43181	-0.018	0.0259	-0.005	0.0505	-0.29	0.0196	Cytoplasm	enzyme
NDUFS5	NADH:ubiquinone oxidoreductase subunit S5	O43920	O43920	O43920	0.042	0.348	0.113	0.0773	0.014	0.297	Cytoplasm	enzyme
NDUFS6	NADH:ubiquinone oxidoreductase subunit S6	O75380	O75380	O75380	0.092	0.0638	0.095	0.067	0.018	0.275	Cytoplasm	enzyme
NDUFS7	NADH:ubiquinone oxidoreductase core subunit S7	O75251	O75251	O75251	-0.068	0.0668	0.062	0.277	-0.142	0.0115	Cytoplasm	enzyme
NDUFS8	NADH:ubiquinone oxidoreductase core subunit S8	O00217	O00217	O00217	-0.084	0.147	0.066	0.0761	0.005	0.199	Cytoplasm	enzyme
NDUFV1	NADH:ubiquinone oxidoreductase core subunit V1	P49821	P49821	P49821	0.07	0.0898	0.078	0.0574	0.049	0.223	Cytoplasm	enzyme
NDUFV2	NADH:ubiquinone oxidoreductase core subunit V2	P19404	P19404	P19404	0.065	0.0891	0.002	0.202	0.034	0.211	Cytoplasm	enzyme
NEB	nebulin	P20929	P20929	P20929	-0.014	0.246	-0.017	0.158	0.006	0.302	Cytoplasm	other
NEDD8	NEDD8 ubiquitin like modifier	Q15843	Q15843	Q15843	-0.138	0.299	-0.419	0.000187	-0.798	2.06e-10	Nucleus	enzyme
NEK7	NIMA related kinase 7	Q8TDX7	Q8TDX7		-1.224	0.000972	-0.603	9.26e-05			Nucleus	kinase
NES	nestin	P48681			-0.113	0.178					Extracellular Space	other
NEXN	nexilin F-actin binding protein	Q0ZGT2	Q0ZGT2	Q0ZGT2	-0.298	0.000182	-0.04	0.229	-0.783	7.35e-12	Plasma Membrane	other
NIBAN1	niban apoptosis regulator 1	Q9BZQ8	Q9BZQ8		-0.28	3.58e-05	-0.054	0.235			Cytoplasm	other
NID1	nidogen 1	P14543	P14543	P14543	-0.201	0.000331	-0.141	0.000707	-0.115	0.037	Extracellular Space	other
NID2	nidogen 2	Q14112	Q14112	Q14112	-0.173	0.0287	-0.149	0.000308	-0.218	0.00022	Extracellular Space	other
NIF3L1	NGG1 interacting factor 3 like 1	Q9GZT8	Q9GZT8		0.122	0.0734	-0.514	9.95e-05			Cytoplasm	other
NIPSNAP2	nipsnap homolog 2	O75323	O75323	O75323	0.019	0.149	-0.003	0.318	-0.335	1.29e-11	Plasma Membrane	other
NIPSNAP3B	nipsnap homolog 3B	Q9BS92	Q9BS92	Q9BS92	0.258	0.0393	0.129	0.257	0.414	0.00774	Other	other
NIT1	nitrilase 1	Q86X76			0.185	0.00162					Cytoplasm	enzyme
NIT2	nitrilase family member 2	Q9NQR4	Q9NQR4	Q9NQR4	-0.114	0.0264	-0.157	0.00024	-0.334	0.000189	Cytoplasm	enzyme
NLRX1	NLR family member X1	Q86UT6	Q86UT6	Q86UT6	-0.239	0.000288	-0.128	0.00165	-0.242	0.0372	Cytoplasm	other		NX-13
NME1	NME/NM23 nucleoside diphosphate kinase 1	P15531	P15531		-0.118	0.0301	-0.123	0.0547			Cytoplasm	kinase	unspecified application
NME2	NME/NM23 nucleoside diphosphate kinase 2	P22392	P22392	P22392	-0.095	0.0246	-0.082	0.0442	-0.47	3.25e-14	Nucleus	kinase
NNT	nicotinamide nucleotide transhydrogenase	Q13423	Q13423	Q13423	-0.027	0.258	-0.031	0.218	0.021	0.311	Cytoplasm	enzyme
NOL3	nucleolar protein 3	O60936	O60936	O60936	0.114	0.00753	0.038	0.282	0.106	0.0407	Nucleus	other
NPEPPS	aminopeptidase puromycin sensitive	P55786	P55786	P55786	0.042	0.00676	0.04	0.00775	-0.005	0.207	Cytoplasm	peptidase	unspecified application
NPLOC4	NPL4 homolog, ubiquitin recognition factor	Q8TAT6			-0.538	3.88e-08					Nucleus	other
NPM1	nucleophosmin 1	P06748	P06748	P06748	-0.582	1.14e-05	-0.67	4.72e-05	-0.285	0.00214	Nucleus	transcription regulator	disease progression,unspecified application
NQO2	N-ribosyldihydronicotinamide:quinone dehydrogenase 2	P16083	P16083	P16083	0.442	0.0534	0.442	0.0349	-1.53	6.24e-08	Cytoplasm	enzyme		caricotamide
NRAP	nebulin related anchoring protein	Q86VF7	Q86VF7	Q86VF7	-0.108	0.013	-0.1	0.096	-0.172	0.0228	Cytoplasm	other
NSFL1C	NSFL1 cofactor	Q9UNZ2	Q9UNZ2	Q9UNZ2	-0.069	0.00587	-0.038	0.00828	-0.108	0.00182	Cytoplasm	other
NT5C	5', 3'-nucleotidase, cytosolic			Q8TCD5					0.106	0.184	Cytoplasm	phosphatase	efficacy
NT5C1A	5'-nucleotidase, cytosolic IA	Q9BXI3	Q9BXI3	Q9BXI3	0.097	0.36	0.119	0.243	-0.723	3.1e-09	Cytoplasm	phosphatase
NT5C3A	5'-nucleotidase, cytosolic IIIA	Q9H0P0	Q9H0P0	Q9H0P0	0.018	0.345	0.059	0.0652	0.369	0.00782	Cytoplasm	phosphatase
NTMT1	N-terminal Xaa-Pro-Lys N-methyltransferase 1	Q9BV86			-0.589	2.66e-11					Nucleus	enzyme
NUDT2	nudix hydrolase 2		P50583				0.331	0.145			Plasma Membrane	phosphatase
NUTF2	nuclear transport factor 2	P61970	P61970	P61970	-0.215	3.01e-06	-0.145	0.0205	-0.142	0.00292	Nucleus	other
NXN	nucleoredoxin	Q6DKJ4	Q6DKJ4	Q6DKJ4	-0.212	0.00043	0.037	0.135	-0.487	3.03e-11	Nucleus	enzyme
OBSCN	obscurin, cytoskeletal calmodulin and titin-interacting RhoGEF	Q5VST9	Q5VST9	Q5VST9	-0.139	0.000531	-0.135	0.00043	-0.121	0.00347	Cytoplasm	kinase
OCIAD1	OCIA domain containing 1	Q9NX40	Q9NX40	Q9NX40	-0.029	0.0483	-0.219	1.01e-05	-0.274	7.22e-07	Cytoplasm	other
OGDH	oxoglutarate dehydrogenase	Q02218	Q02218	Q02218	-0.089	0.031	-0.085	0.0324	0.019	0.303	Cytoplasm	enzyme
OGN	osteoglycin	P20774	P20774	P20774	-0.593	0.059	-0.767	0.0255	-0.246	0.268	Extracellular Space	growth factor
OLA1	Obg like ATPase 1	Q9NTK5	Q9NTK5	Q9NTK5	0.09	0.0195	0.061	0.0427	-0.029	0.0104	Cytoplasm	enzyme
OPA1	OPA1 mitochondrial dynamin like GTPase	O60313	O60313		-0.324	0.0361	-0.144	0.203			Cytoplasm	enzyme
OPA3	outer mitochondrial membrane lipid metabolism regulator OPA3	Q9H6K4			-0.11	0.263					Cytoplasm	other
OPLAH	5-oxoprolinase, ATP-hydrolysing	O14841			0.151	0.128					Cytoplasm	enzyme
OPTN	optineurin		Q96CV9				0.084	0.247			Cytoplasm	other	unspecified application
ORM1	orosomucoid 1	P02763	P02763	P02763	0.23	0.0131	0.23	0.0125	0.029	0.347	Extracellular Space	other	unspecified application
ORM2	orosomucoid 2	P19652	P19652	P19652	0.262	0.00406	0.324	0.00143	-0.144	0.0312	Extracellular Space	other
OSBP	oxysterol binding protein	P22059			-0.508	1.58e-06					Cytoplasm	transporter
OSBPL1A	oxysterol binding protein like 1A	Q9BXW6			0.084	0.245					Cytoplasm	transporter
OTUB1	OTU deubiquitinase, ubiquitin aldehyde binding 1	Q96FW1	Q96FW1	Q96FW1	-0.234	2.52e-05	-0.056	0.0533	-0.381	2.36e-06	Cytoplasm	enzyme
OXCT1	3-oxoacid CoA-transferase 1	P55809		P55809	-0.142	0.202			-0.064	0.0826	Cytoplasm	enzyme
OXSR1	oxidative stress responsive kinase 1	O95747	O95747	O95747	-0.035	0.241	-0.116	0.000461	-0.324	1.61e-13	Nucleus	kinase
P4HB	prolyl 4-hydroxylase subunit beta	P07237	P07237	P07237	-0.074	0.00334	-0.138	2.31e-05	0.016	0.198	Cytoplasm	enzyme
PA2G4	proliferation-associated 2G4		Q9UQ80				-0.286	8.07e-05			Nucleus	transcription regulator
PABPC1	poly(A) binding protein cytoplasmic 1			P11940					-0.068	0.311	Cytoplasm	translation regulator
PABPC4	poly(A) binding protein cytoplasmic 4	Q13310	Q13310	Q13310	-0.068	0.00855	-0.261	4.42e-06	-0.068	0.311	Cytoplasm	translation regulator
PACSIN3	protein kinase C and casein kinase substrate in neurons 3	Q9UKS6	Q9UKS6	Q9UKS6	-0.075	0.0206	-0.084	0.0251	-0.031	0.298	Cytoplasm	other
PADI2	peptidyl arginine deiminase 2	Q9Y2J8	Q9Y2J8	Q9Y2J8	-0.037	0.242	-0.019	0.27	-0.001	0.305	Cytoplasm	enzyme
PAFAH1B1	platelet activating factor acetylhydrolase 1b regulatory subunit 1	P43034	P43034		0.022	0.3	0.06	0.346			Cytoplasm	enzyme
PAFAH1B2	platelet activating factor acetylhydrolase 1b catalytic subunit 2	P68402	P68402	P68402	-0.291	0.00317	-0.595	2.39e-06	-0.832	1.34e-13	Cytoplasm	enzyme
PAFAH1B3	platelet activating factor acetylhydrolase 1b catalytic subunit 3	Q15102			-0.08	0.268					Cytoplasm	enzyme
PAICS	phosphoribosylaminoimidazole carboxylase and phosphoribosylaminoimidazolesuccinocarboxamide synthase	P22234	P22234		0.098	0.0218	0.055	0.198			Cytoplasm	enzyme
PALLD	palladin, cytoskeletal associated protein	Q8WX93	Q8WX93		-0.774	1.38e-09	-0.364	9.9e-05			Plasma Membrane	other
PANK4	pantothenate kinase 4 (inactive)	Q9NVE7	Q9NVE7	Q9NVE7	-0.154	0.000489	-0.38	1.47e-10	-0.796	1.26e-12	Cytoplasm	kinase
PARK7	Parkinsonism associated deglycase	Q99497	Q99497	Q99497	0.004	0.248	0.024	0.0763	-0.072	8.79e-05	Nucleus	enzyme	diagnosis
PARP1	poly(ADP-ribose) polymerase 1		P09874				0.066	0.235			Nucleus	enzyme	diagnosis,efficacy,prognosis	2X-121,[18F]fluorthanatrace,ABT-767,amelparib,AMXI-5001,AZD9574,CEP-9722,fluzoparib,IDX-1197,iniparib,niraparib,olaparib,poly ADP ribose polymerase 1 inhibitor,RP12146,rucaparib,SC10914,senaparib,simmiparib,talazoparib,TQB3823,veliparib
PARVB	parvin beta	Q9HBI1			-0.067	0.277					Cytoplasm	other
PBXIP1	PBX homeobox interacting protein 1	Q96AQ6	Q96AQ6	Q96AQ6	-0.254	0.00208	-0.198	0.000197	-0.05	0.000293	Nucleus	transcription regulator
PCBD1	pterin-4 alpha-carbinolamine dehydratase 1		P61457				-0.917	1.15e-07			Nucleus	transcription regulator
PCBD2	pterin-4 alpha-carbinolamine dehydratase 2	Q9H0N5	Q9H0N5	Q9H0N5	-0.365	0.000155	-0.198	0.0186	-0.354	3.67e-06	Nucleus	enzyme
PCBP1	poly(rC) binding protein 1	Q15365	Q15365	Q15365	-0.004	0.287	-0.048	0.0505	0.073	0.126	Nucleus	translation regulator
PCBP2	poly(rC) binding protein 2	Q15366	Q15366		-0.227	2.4e-07	-0.258	3.34e-05			Nucleus	other
PCCA	propionyl-CoA carboxylase subunit alpha	P05165	P05165		-0.151	0.35	-0.678	1.09e-06			Cytoplasm	enzyme
PCCB	propionyl-CoA carboxylase subunit beta	P05166	P05166		-0.423	0.00018	-0.207	0.146			Cytoplasm	enzyme
PCMT1	protein-L-isoaspartate (D-aspartate) O-methyltransferase	P22061	P22061	P22061	0.033	0.231	0.094	0.000653	-0.126	0.00572	Cytoplasm	enzyme
PCYOX1	prenylcysteine oxidase 1	Q9UHG3	Q9UHG3	Q9UHG3	-0.049	0.0686	-0.071	0.00352	0.04	0.121	Cytoplasm	enzyme
PCYT2	phosphate cytidylyltransferase 2, ethanolamine	Q99447			-0.253	1.13e-05					Cytoplasm	enzyme
PDAP1	PDGFA associated protein 1	Q13442	Q13442		-0.81	1.24e-06	-0.495	3.56e-08			Cytoplasm	other
PDCD5	programmed cell death 5	O14737	O14737		-0.033	0.116	-0.498	0.000103			Nucleus	other
PDCD6IP	programmed cell death 6 interacting protein	Q8WUM4	Q8WUM4	Q8WUM4	-0.389	7.81e-07	-0.213	0.00108	-0.244	0.012	Cytoplasm	other
PDHA1	pyruvate dehydrogenase E1 subunit alpha 1	P08559	P08559	P08559	-0.049	0.123	-0.031	0.164	-0.083	0.0392	Cytoplasm	enzyme	unspecified application
PDHB	pyruvate dehydrogenase E1 subunit beta	P11177	P11177	P11177	-0.046	0.0978	-0.058	0.0629	-0.086	0.0153	Cytoplasm	enzyme	unspecified application
PDHX	pyruvate dehydrogenase complex component X	O00330	O00330	O00330	-0.068	0.0367	0.026	0.248	-0.158	0.000463	Cytoplasm	enzyme
PDIA3	protein disulfide isomerase family A member 3	P30101	P30101		-0.606	1.76e-06	-0.061	0.301			Cytoplasm	peptidase	diagnosis
PDIA6	protein disulfide isomerase family A member 6	Q15084	Q15084	Q15084	-0.302	1.11e-08	-0.255	2.61e-08	0.007	0.197	Cytoplasm	enzyme
PDK2	pyruvate dehydrogenase kinase 2	Q15119			0.197	0.246					Cytoplasm	kinase	unspecified application	AZD7545
PDLIM1	PDZ and LIM domain 1	O00151	O00151	O00151	-0.115	0.0606	-0.105	0.0981	-0.003	0.131	Cytoplasm	transcription regulator	unspecified application
PDLIM3	PDZ and LIM domain 3	Q53GG5	Q53GG5	Q53GG5	-0.021	0.327	-0.028	0.253	0.027	0.284	Cytoplasm	other
PDLIM5	PDZ and LIM domain 5	Q96HC4	Q96HC4	Q96HC4	-0.001	0.267	-0.001	0.306	0.054	0.0541	Cytoplasm	other	unspecified application
PDLIM7	PDZ and LIM domain 7	Q9NR12	Q9NR12	Q9NR12	-0.023	0.32	-0.132	0.0897	-0.232	0.000252	Cytoplasm	other	unspecified application
PDP1	pyruvate dehydrogenase phosphatase catalytic subunit 1		Q9P0J1				-0.039	0.319			Cytoplasm	phosphatase		CPI-613,OMT-111
PDXK	pyridoxal kinase	O00764	O00764		-0.289	0.00133	-0.626	3.03e-10			Cytoplasm	kinase
PEA15	proliferation and apoptosis adaptor protein 15			Q15121					-0.071	0.338	Cytoplasm	transporter	prognosis
PEBP1	phosphatidylethanolamine binding protein 1	P30086	P30086	P30086	-0.084	0.00523	-0.119	0.000265	-0.049	0.0799	Cytoplasm	other	unspecified application
PEPD	peptidase D	P12955			-0.871	2.03e-05					Cytoplasm	peptidase
PERM1	PPARGC1 and ESRR induced regulator, muscle 1	Q5SV97	Q5SV97		-0.146	0.0584	-0.16	0.013			Other	other
PFDN2	prefoldin subunit 2	Q9UHV9			-0.335	9.6e-05					Cytoplasm	other
PFDN4	prefoldin subunit 4		Q9NQP4				-0.224	0.138			Cytoplasm	other
PFDN5	prefoldin subunit 5	Q99471			-0.106	0.066					Nucleus	transcription regulator
PFKL	phosphofructokinase, liver type	P17858			-0.023	0.343					Cytoplasm	kinase
PFKM	phosphofructokinase, muscle	P08237	P08237	P08237	0.011	0.334	0.025	0.264	0.058	0.156	Cytoplasm	kinase	unspecified application
PFN1	profilin 1	P07737	P07737	P07737	-0.05	0.00739	-0.015	0.125	0.012	0.337	Cytoplasm	other	unspecified application
PFN2	profilin 2	P35080	P35080	P35080	-0.123	0.161	-0.002	0.281	-0.083	0.0943	Cytoplasm	enzyme
PGAM1	phosphoglycerate mutase 1	P18669	P18669	P18669	-0.049	0.0138	-0.044	0.0763	0.018	0.273	Cytoplasm	phosphatase
PGAM2	phosphoglycerate mutase 2	P15259	P15259	P15259	-0.081	0.00887	-0.088	0.0143	0.046	0.18	Cytoplasm	phosphatase	unspecified application
PGD	phosphogluconate dehydrogenase	P52209	P52209	P52209	-0.66	2.36e-06	-0.045	0.151	-0.471	3.56e-07	Cytoplasm	enzyme
PGK1	phosphoglycerate kinase 1	P00558	P00558	P00558	0.013	0.308	-0.001	0.354	-0.061	0.038	Cytoplasm	kinase		CBR-470-1
PGK2	phosphoglycerate kinase 2			P07205					-0.371	3.35e-07	Cytoplasm	kinase
PGLS	6-phosphogluconolactonase		O95336				-0.495	5.34e-05			Cytoplasm	enzyme
PGM1	phosphoglucomutase 1	P36871	P36871	P36871	0.037	0.0846	0.038	0.0816	0.07	0.0327	Cytoplasm	enzyme
PGM5	phosphoglucomutase 5	Q15124	Q15124	Q15124	0.01	0.265	0.026	0.355	-0.155	0.0187	Cytoplasm	enzyme
PGP	phosphoglycolate phosphatase	A6NDG6	A6NDG6	A6NDG6	0.13	0.00659	0.086	0.12	-0.084	0.107	Cytoplasm	enzyme
PGPEP1	pyroglutamyl-peptidase I		Q9NXJ5				-0.488	8.11e-06			Cytoplasm	peptidase
PGRMC2	progesterone receptor membrane component 2	O15173	O15173		-0.586	2.69e-06	-0.512	0.000776			Nucleus	transporter
PHB1	prohibitin 1	P35232	P35232	P35232	-0.084	0.0543	-0.061	0.0426	-0.116	0.0097	Nucleus	transcription regulator	diagnosis	prohibitin-targeting peptide 1
PHB2	prohibitin 2	Q99623	Q99623	Q99623	-0.028	0.155	-0.017	0.232	-0.145	0.000683	Cytoplasm	transcription regulator
PHKA1	phosphorylase kinase regulatory subunit alpha 1	P46020	P46020	P46020	0.016	0.333	0.024	0.343	-0.208	0.000981	Cytoplasm	kinase
PHKB	phosphorylase kinase regulatory subunit beta	Q93100	Q93100	Q93100	0.039	0.308	0.031	0.351	-0.306	8.05e-08	Cytoplasm	kinase
PHKG1	phosphorylase kinase catalytic subunit gamma 1	Q16816	Q16816	Q16816	0.033	0.354	-0.061	0.0783	-0.286	0.000159	Cytoplasm	kinase
PHPT1	phosphohistidine phosphatase 1	Q9NRX4	Q9NRX4	Q9NRX4	-0.163	0.00708	-0.181	0.00107	-0.202	0.00243	Cytoplasm	phosphatase
PIN1	peptidylprolyl cis/trans isomerase, NIMA-interacting 1	Q13526	Q13526		0.364	0.00205	0.079	0.293			Nucleus	enzyme
PITHD1	PITH domain containing 1	Q9GZP4			0.078	0.341					Nucleus	other
PITRM1	pitrilysin metallopeptidase 1	Q5JRX3		Q5JRX3	0.277	0.198			-0.653	1.03e-06	Cytoplasm	peptidase
PKM	pyruvate kinase M1/2	P14618	P14618	P14618	0.005	0.335	0.013	0.295	-0.011	0.259	Cytoplasm	kinase	unspecified application	CAP-232,TP-1454
PLAA	phospholipase A2 activating protein	Q9Y263	Q9Y263		-0.61	2.95e-09	-0.484	7.33e-07			Cytoplasm	other
PLCD4	phospholipase C delta 4	Q9BRC7	Q9BRC7	Q9BRC7	0.181	0.000513	0.079	0.0709	-0.274	7.63e-06	Cytoplasm	enzyme
PLEC	plectin	Q15149	Q15149	Q15149	-0.067	0.0218	-0.064	0.0297	-0.008	0.293	Cytoplasm	other	unspecified application	ZB131
PLG	plasminogen	P00747	P00747	P00747	0.195	0.21	0.316	0.00809	-0.102	0.161	Extracellular Space	peptidase	diagnosis,unspecified application	6-aminocaproic acid,aprotinin,PLAT,reteplase,tenecteplase,tranexamic acid
PLGRKT	plasminogen receptor with a C-terminal lysine	Q9HBL7			0.102	0.168					Cytoplasm	other
PLIN2	perilipin 2	Q99541	Q99541	Q99541	0	0.369	0.072	0.243	0.744	0.000786	Plasma Membrane	other	disease progression
PLIN3	perilipin 3	O60664	O60664	O60664	-0.025	0.0977	-0.064	0.0766	0.097	0.0846	Cytoplasm	other
PLIN4	perilipin 4	Q96Q06	Q96Q06	Q96Q06	0.194	0.0126	0.26	0.000563	0.534	1.93e-07	Cytoplasm	other
PLIN5	perilipin 5	Q00G26	Q00G26	Q00G26	-0.191	0.00268	-0.434	0.000197	0.516	0.0186	Plasma Membrane	other
PLN	phospholamban		P26678				-0.494	0.00218			Cytoplasm	transporter
PLPBP	pyridoxal phosphate binding protein	O94903	O94903		-0.568	1.12e-11	-0.468	1.14e-10			Cytoplasm	enzyme
PMP2	peripheral myelin protein 2	P02689	P02689		0.022	0.303	-0.619	9.94e-05			Cytoplasm	other
PNP	purine nucleoside phosphorylase	P00491	P00491	P00491	-0.096	0.131	-0.048	0.261	-0.42	0.0306	Nucleus	enzyme		forodesine,PD 141955,purine nucleoside phosphorylase inhibitor
PNPO	pyridoxamine 5'-phosphate oxidase	Q9NVS9	Q9NVS9	Q9NVS9	-0.038	0.146	-0.227	0.000802	-1.14	6.03e-13	Cytoplasm	enzyme	unspecified application
PNPT1	polyribonucleotide nucleotidyltransferase 1	Q8TCS8			-0.63	0.00114					Cytoplasm	enzyme
PON1	paraoxonase 1	P27169			0.087	0.352					Extracellular Space	phosphatase	efficacy,unspecified application
POTEI	POTE ankyrin domain family member I	P0CG38		P0CG38	-0.055	0.0146			-0.135	0.06	Extracellular Space	other
POTEKP	POTE ankyrin domain family member K, pseudogene	Q9BYX7			-0.069	0.156					Cytoplasm	other
PPA1	inorganic pyrophosphatase 1	Q15181	Q15181	Q15181	-0.081	0.0293	-0.119	0.0121	-0.151	0.0044	Cytoplasm	enzyme
PPA2	inorganic pyrophosphatase 2	Q9H2U2			-0.455	2.93e-09					Cytoplasm	enzyme
PPIA	peptidylprolyl isomerase A	P62937	P62937	P62937	-0.055	0.19	-0.016	0.338	-0.004	0.32	Cytoplasm	enzyme		alemtuzumab/cyclosporin A,basiliximab/cyclosporine,cyclosporin A,cyclosporin A/methotrexate,cyclosporine A/sirolimus/tacrolimus,cyclosporine A/tacrolimus,N-methyl-4-Ile-cyclosporin,RMC-6236,RMC-6291
PPIB	peptidylprolyl isomerase B	P23284	P23284		-0.195	0.00254	-0.141	0.00291			Cytoplasm	enzyme
PPIF	peptidylprolyl isomerase F	P30405	P30405	P30405	-0.127	0.0634	-0.08	0.136	-0.101	0.309	Cytoplasm	enzyme
PPM1A	protein phosphatase, Mg2+/Mn2+ dependent 1A	P35813			0.104	0.121					Cytoplasm	phosphatase
PPM1B	protein phosphatase, Mg2+/Mn2+ dependent 1B		O75688				0.255	0.0925			Cytoplasm	phosphatase	unspecified application
PPP1CB	protein phosphatase 1 catalytic subunit beta	P62140	P62140	P62140	-0.066	0.000964	-0.042	0.00647	-0.242	4.78e-11	Cytoplasm	phosphatase
PPP1R2	protein phosphatase 1 regulatory inhibitor subunit 2	P41236			0.04	0.261					Cytoplasm	phosphatase	unspecified application
PPP1R7	protein phosphatase 1 regulatory subunit 7	Q15435	Q15435		-0.1	0.000969	-0.689	9.9e-06			Nucleus	phosphatase
PPP1R27	protein phosphatase 1 regulatory subunit 27	Q86WC6			0.001	0.225					Nucleus	transcription regulator
PPP1R12B	protein phosphatase 1 regulatory subunit 12B	O60237	O60237		-0.086	0.219	-0.082	0.0824			Cytoplasm	phosphatase
PPP1R1A	protein phosphatase 1 regulatory inhibitor subunit 1A	Q13522			0.126	0.328					Cytoplasm	phosphatase
PPP1R2B	PPP1R2 family member B	Q6NXS1			0.04	0.261					Other	other
PPP1R3A	protein phosphatase 1 regulatory subunit 3A	Q16821	Q16821	Q16821	-0.437	2.37e-09	-0.158	0.000665	-1.047	1.4e-17	Cytoplasm	phosphatase	unspecified application
PPP2CA	protein phosphatase 2 catalytic subunit alpha		P67775	P67775			0.089	0.0365	-0.028	0.226	Cytoplasm	phosphatase
PPP2CB	protein phosphatase 2 catalytic subunit beta	P62714			0.061	0.251					Cytoplasm	phosphatase
PPP2R1A	protein phosphatase 2 scaffold subunit Aalpha	P30153	P30153	P30153	0.043	0.0688	0.048	0.107	-0.032	0.0797	Cytoplasm	phosphatase
PPP2R2A	protein phosphatase 2 regulatory subunit Balpha	P63151	P63151	P63151	0.022	0.203	0.118	0.034	0.172	0.000509	Cytoplasm	phosphatase
PPP2R5D	protein phosphatase 2 regulatory subunit B'delta	Q14738			0.024	0.00167					Nucleus	phosphatase
PPP3CA	protein phosphatase 3 catalytic subunit alpha			Q08209					-0.749	2.34e-15	Cytoplasm	phosphatase		cyclosporin A,cyclosporin A/methotrexate,methylprednisolone/tacrolimus,pimecrolimus,prednisone/tacrolimus,tacrolimus,voclosporin
PPP3CB	protein phosphatase 3 catalytic subunit beta	P16298	P16298		0.027	0.275	0.076	0.246			Plasma Membrane	phosphatase		cyclosporin A,cyclosporin A/methotrexate,methylprednisolone/tacrolimus,pimecrolimus,prednisone/tacrolimus,tacrolimus,voclosporin
PPP3R1	protein phosphatase 3 regulatory subunit B, alpha	P63098			0.263	0.0573					Cytoplasm	phosphatase		cyclosporin A,cyclosporin A/methotrexate
PPP5C	protein phosphatase 5 catalytic subunit	P53041	P53041		0.223	0.0291	-0.074	0.0943			Nucleus	phosphatase
PRDX1	peroxiredoxin 1	Q06830	Q06830	Q06830	0.045	0.0366	0.066	0.0104	-0.061	0.0345	Cytoplasm	enzyme	diagnosis
PRDX2	peroxiredoxin 2	P32119	P32119	P32119	0.035	0.202	0.051	0.139	-0.14	0.00562	Cytoplasm	enzyme
PRDX3	peroxiredoxin 3	P30048	P30048	P30048	-0.122	0.000302	-0.091	0.00354	-0.037	0.122	Cytoplasm	enzyme	diagnosis
PRDX4	peroxiredoxin 4	Q13162			0.053	0.241					Cytoplasm	enzyme
PRDX5	peroxiredoxin 5	P30044	P30044	P30044	-0.032	0.112	-0.061	0.0168	-0.041	0.0132	Cytoplasm	enzyme	unspecified application	auranofin
PRDX6	peroxiredoxin 6	P30041	P30041	P30041	0.075	0.0135	0.083	0.0126	0.106	0.00315	Cytoplasm	enzyme	unspecified application
PREB	prolactin regulatory element binding	Q9HCU5			0.101	0.161					Nucleus	transcription regulator
PRELP	proline and arginine rich end leucine rich repeat protein	P51888	P51888	P51888	-1.192	0.0045	-0.905	0.0294	-0.034	0.315	Extracellular Space	other
PREP	prolyl endopeptidase	P48147	P48147	P48147	0.04	0.109	0.07	0.0132	-0.025	0.0845	Cytoplasm	peptidase		Z 321
PRKAA2	protein kinase AMP-activated catalytic subunit alpha 2	P54646	P54646	P54646	-0.008	0.203	-0.16	0.0225	-0.08	0.1	Cytoplasm	kinase
PRKAB2	protein kinase AMP-activated non-catalytic subunit beta 2	O43741	O43741	O43741	-0.227	5.93e-09	-0.229	2.24e-07	0.113	0.171	Cytoplasm	kinase
PRKACA	protein kinase cAMP-activated catalytic subunit alpha	P17612	P17612	P17612	-0.061	0.0234	0.009	0.226	-0.204	2.53e-07	Cytoplasm	kinase
PRKAG1	protein kinase AMP-activated non-catalytic subunit gamma 1	P54619	P54619		-0.05	0.261	-0.071	0.228			Nucleus	kinase
PRKAR1A	protein kinase cAMP-dependent type I regulatory subunit alpha	P10644	P10644	P10644	-0.024	0.19	-0.008	0.122	-0.024	0.0814	Cytoplasm	kinase
PRKAR2A	protein kinase cAMP-dependent type II regulatory subunit alpha	P13861	P13861	P13861	-0.073	0.0827	-0.016	0.277	-0.044	0.105	Cytoplasm	kinase
PRKCSH	protein kinase C substrate 80K-H	P14314			-0.605	9.74e-08					Cytoplasm	enzyme
PRKG1	protein kinase cGMP-dependent 1		Q13976				-0.021	0.273			Cytoplasm	kinase
PRKRA	protein activator of interferon induced protein kinase EIF2AK2	O75569	O75569	O75569	-0.411	1.87e-06	-0.378	2.59e-05	-0.763	7.2e-10	Cytoplasm	other
PRMT1	protein arginine methyltransferase 1	Q99873	Q99873		-1.533	0.000185	-0.402	8.73e-05			Nucleus	enzyme		GSK3368715,PRMT1 inhibitor
PRMT5	protein arginine methyltransferase 5	O14744			-0.621	2.63e-08					Cytoplasm	enzyme		AMG 193,GSK3326595,JNJ-64619178,MRTX1719,PF-06939999,PRMT5 inhibitor,PRT543,PRT811,SH3765,TNG908
PROB1	proline rich basic protein 1	E7EW31	E7EW31		-0.04	0.0345	-0.464	3.25e-07			Nucleus	other
PRPS1	phosphoribosyl pyrophosphate synthetase 1	P60891	P60891	P60891	-0.35	5.39e-05	-0.181	0.0162	-0.258	1.4e-05	Cytoplasm	kinase
PRR33	proline rich 33	A8MZF0	A8MZF0		-0.003	0.228	-0.422	1.02e-05			Other	other
PRXL2A	peroxiredoxin like 2A	Q9BRX8	Q9BRX8	Q9BRX8	-0.169	0.0386	-0.346	0.000207	-0.645	7.02e-06	Extracellular Space	other
PSAP	prosaposin	P07602	P07602	P07602	-0.116	0.151	-0.036	0.24	-0.396	4.09e-07	Extracellular Space	other	unspecified application
PSMA1	proteasome 20S subunit alpha 1	P25786	P25786	P25786	-0.03	0.251	-0.174	0.000982	-0.236	0.00231	Cytoplasm	peptidase
PSMA2	proteasome 20S subunit alpha 2	P25787	P25787	P25787	-0.265	1.05e-05	0.092	0.157	-0.629	4.28e-09	Cytoplasm	peptidase	unspecified application
PSMA3	proteasome 20S subunit alpha 3	P25788	P25788	P25788	-0.034	0.159	-0.388	0.000292	-0.479	6.75e-07	Cytoplasm	peptidase
PSMA4	proteasome 20S subunit alpha 4	P25789	P25789		0.329	0.0137	0.461	0.00293			Cytoplasm	peptidase
PSMA5	proteasome 20S subunit alpha 5	P28066	P28066	P28066	-0.305	0.000335	-0.044	0.0218	-0.135	0.065	Cytoplasm	peptidase
PSMA6	proteasome 20S subunit alpha 6	P60900	P60900		-0.333	0.00076	-0.022	0.303			Cytoplasm	peptidase
PSMA7	proteasome 20S subunit alpha 7	O14818	O14818		0.045	0.331	0.029	0.182			Cytoplasm	peptidase
PSMB1	proteasome 20S subunit beta 1	P20618	P20618	P20618	-0.011	0.0943	0.052	0.184	-0.676	1.15e-15	Cytoplasm	peptidase		bortezomib,bortezomib/cladribine/rituximab,bortezomib/dexamethasone,bortezomib/dexamethasone/doxorubicin,bortezomib/dexamethasone/lenalidomide,bortezomib/dexamethasone/pomalidomide,bortezomib/dexamethasone/rituximab,bortezomib/dexamethasone/thalidomide,bortezomib/doxorubicin,bortezomib/fulvestrant,bortezomib/lenalidomide,bortezomib/paclitaxel,bortezomib/prednisone,bortezomib/rituximab,bortezomib/…
PSMB2	proteasome 20S subunit beta 2	P49721			0.273	0.000274					Cytoplasm	peptidase		bortezomib,bortezomib/cladribine/rituximab,bortezomib/dexamethasone,bortezomib/dexamethasone/doxorubicin,bortezomib/dexamethasone/lenalidomide,bortezomib/dexamethasone/pomalidomide,bortezomib/dexamethasone/rituximab,bortezomib/dexamethasone/thalidomide,bortezomib/doxorubicin,bortezomib/fulvestrant,bortezomib/lenalidomide,bortezomib/paclitaxel,bortezomib/prednisone,bortezomib/rituximab,bortezomib/…
PSMB3	proteasome 20S subunit beta 3	P49720	P49720		-0.332	0.00577	0.007	0.291			Cytoplasm	peptidase
PSMB5	proteasome 20S subunit beta 5	P28074	P28074		0.221	0.28	0.188	0.231			Cytoplasm	peptidase		bortezomib,bortezomib/cladribine/rituximab,bortezomib/dexamethasone,bortezomib/dexamethasone/doxorubicin,bortezomib/dexamethasone/lenalidomide,bortezomib/dexamethasone/pomalidomide,bortezomib/dexamethasone/rituximab,bortezomib/dexamethasone/thalidomide,bortezomib/doxorubicin,bortezomib/fulvestrant,bortezomib/lenalidomide,bortezomib/paclitaxel,bortezomib/prednisone,bortezomib/rituximab,bortezomib/…
PSMB6	proteasome 20S subunit beta 6	P28072			0.04	0.347					Nucleus	peptidase
PSMB7	proteasome 20S subunit beta 7		Q99436				-0.206	0.0681			Cytoplasm	peptidase
PSMC1	proteasome 26S subunit, ATPase 1	P62191	P62191	P62191	-0.018	0.332	-0.117	0.155	-0.795	3.02e-12	Nucleus	peptidase
PSMC2	proteasome 26S subunit, ATPase 2	P35998	P35998	P35998	-0.303	0.000908	-0.508	2.3e-06	0.218	0.015	Nucleus	peptidase
PSMC3	proteasome 26S subunit, ATPase 3	P17980	P17980	P17980	-0.182	4.84e-06	0.004	0.23	-0.143	0.0112	Nucleus	enzyme
PSMC4	proteasome 26S subunit, ATPase 4	P43686	P43686	P43686	-0.076	0.29	0.028	0.318	-0.018	0.269	Nucleus	peptidase
PSMC5	proteasome 26S subunit, ATPase 5	P62195	P62195	P62195	-0.022	0.358	0.004	0.335	-0.045	0.229	Nucleus	transcription regulator
PSMC6	proteasome 26S subunit, ATPase 6	P62333	P62333	P62333	0.032	0.209	-0.102	0.000472	-0.128	0.00168	Nucleus	peptidase
PSMD1	proteasome 26S subunit, non-ATPase 1	Q99460	Q99460	Q99460	-0.236	0.000225	-0.051	0.0557	0.021	0.346	Cytoplasm	other		bortezomib,bortezomib/cladribine/rituximab,bortezomib/dexamethasone,bortezomib/dexamethasone/doxorubicin,bortezomib/dexamethasone/lenalidomide,bortezomib/dexamethasone/pomalidomide,bortezomib/dexamethasone/rituximab,bortezomib/dexamethasone/thalidomide,bortezomib/doxorubicin,bortezomib/fulvestrant,bortezomib/lenalidomide,bortezomib/paclitaxel,bortezomib/prednisone,bortezomib/rituximab,bortezomib/…
PSMD2	proteasome 26S subunit ubiquitin receptor, non-ATPase 2	Q13200	Q13200	Q13200	-0.191	5.66e-06	-0.066	0.107	-0.065	0.0705	Cytoplasm	other		bortezomib,bortezomib/cladribine/rituximab,bortezomib/dexamethasone,bortezomib/dexamethasone/doxorubicin,bortezomib/dexamethasone/lenalidomide,bortezomib/dexamethasone/pomalidomide,bortezomib/dexamethasone/rituximab,bortezomib/dexamethasone/thalidomide,bortezomib/doxorubicin,bortezomib/fulvestrant,bortezomib/lenalidomide,bortezomib/paclitaxel,bortezomib/prednisone,bortezomib/rituximab,bortezomib/…
PSMD3	proteasome 26S subunit, non-ATPase 3	O43242	O43242	O43242	-0.119	5.02e-05	-0.01	0.149	-0.143	0.000238	Cytoplasm	other
PSMD4	proteasome 26S subunit ubiquitin receptor, non-ATPase 4	P55036	P55036		-0.031	0.000107	-0.113	0.0224			Cytoplasm	other	diagnosis,disease progression
PSMD5	proteasome 26S subunit, non-ATPase 5	Q16401			-0.192	0.354					Cytoplasm	other
PSMD6	proteasome 26S subunit, non-ATPase 6	Q15008	Q15008	Q15008	-0.37	6.1e-08	0.042	0.199	-0.879	1.57e-13	Cytoplasm	enzyme
PSMD7	proteasome 26S subunit, non-ATPase 7	P51665	P51665	P51665	-0.617	1.35e-09	-0.023	0.0916	-0.224	0.000898	Cytoplasm	other
PSMD8	proteasome 26S subunit, non-ATPase 8	P48556	P48556		-0.353	0.000114	-0.066	0.283			Cytoplasm	other
PSMD9	proteasome 26S subunit, non-ATPase 9	O00233			0.249	0.221					Cytoplasm	transcription regulator
PSMD11	proteasome 26S subunit, non-ATPase 11	O00231	O00231	O00231	-0.198	0.000462	-0.316	0.00265	-0.602	4.16e-11	Cytoplasm	other
PSMD12	proteasome 26S subunit, non-ATPase 12	O00232	O00232	O00232	-0.028	0.263	-0.211	3.87e-06	-0.426	3.04e-11	Cytoplasm	other
PSMD13	proteasome 26S subunit, non-ATPase 13	Q9UNM6	Q9UNM6	Q9UNM6	0.167	0.146	-0.097	0.0206	-0.482	3.67e-14	Cytoplasm	peptidase
PSMD14	proteasome 26S subunit, non-ATPase 14	O00487	O00487	O00487	-0.269	0.0122	-0.313	6.5e-06	-0.377	7.58e-08	Cytoplasm	peptidase
PSME1	proteasome activator subunit 1	Q06323	Q06323	Q06323	-0.175	0.00152	-0.228	0.00122	-0.231	2.96e-05	Cytoplasm	other
PSME2	proteasome activator subunit 2	Q9UL46	Q9UL46	Q9UL46	-0.447	0.000177	-0.384	1.06e-05	-0.642	1.95e-08	Cytoplasm	peptidase
PSMF1	proteasome inhibitor subunit 1	Q92530	Q92530		-0.005	0.188	-0.276	0.00274			Cytoplasm	other	diagnosis
PTGES2	prostaglandin E synthase 2	Q9H7Z7	Q9H7Z7	Q9H7Z7	-0.243	0.00247	-0.131	0.131	-0.326	0.00107	Cytoplasm	transcription regulator
PTGES3	prostaglandin E synthase 3	Q15185	Q15185		-0.415	6.2e-07	-0.887	0.000137			Cytoplasm	enzyme
PTGR2	prostaglandin reductase 2	Q8N8N7	Q8N8N7	Q8N8N7	0.053	0.0976	0.056	0.0234	0.089	0.25	Cytoplasm	enzyme		glycyrrhetinic acid
PTPA	protein phosphatase 2 phosphatase activator	Q15257	Q15257	Q15257	-0.366	2.21e-05	-0.274	9.37e-05	-0.092	0.0504	Cytoplasm	phosphatase
PTRHD1	peptidyl-tRNA hydrolase domain containing 1	Q6GMV3	Q6GMV3		-0.362	6.98e-07	-0.073	0.1			Cytoplasm	other
PUDP	pseudouridine 5'-phosphatase	Q08623	Q08623	Q08623	0.128	0.0869	-0.024	0.332	-0.1	0.00422	Cytoplasm	enzyme
PURA	purine rich element binding protein A	Q00577	Q00577		-0.656	6.22e-06	0.013	0.255			Nucleus	transcription regulator
PVALB	parvalbumin			P20472					-1.069	0.0103	Cytoplasm	other	unspecified application
PYGB	glycogen phosphorylase B	P11216	P11216	P11216	0.078	0.0125	0.131	0.00242	0.024	0.314	Cytoplasm	enzyme
PYGM	glycogen phosphorylase, muscle associated	P11217	P11217	P11217	0.079	0.0165	0.077	0.0224	-0.039	0.109	Cytoplasm	enzyme
PYURF	PIGY upstream open reading frame	Q96I23	Q96I23		-0.644	4.05e-09	-0.469	2.6e-07			Cytoplasm	other
QARS1	glutaminyl-tRNA synthetase 1	P47897	P47897	P47897	-0.11	0.121	-0.074	0.0708	0.087	0.176	Cytoplasm	enzyme
QDPR	quinoid dihydropteridine reductase	P09417	P09417	P09417	0.012	0.251	0.041	0.304	-0.159	2.58e-07	Cytoplasm	enzyme
RAB10	RAB10, member RAS oncogene family	P61026	P61026	P61026	-0.139	0.0359	-0.173	0.00104	0.091	0.0168	Cytoplasm	enzyme
RAB12	RAB12, member RAS oncogene family	Q6IQ22			0.13	0.346					Cytoplasm	enzyme
RAB18	RAB18, member RAS oncogene family		Q9NP72				-0.045	0.348			Cytoplasm	enzyme
RAB21	RAB21, member RAS oncogene family	Q9UL25	Q9UL25		-0.116	0.00013	-0.176	1.43e-05			Cytoplasm	enzyme
RAB11B	RAB11B, member RAS oncogene family	Q15907	Q15907		-0.229	0.000169	-0.037	0.188			Cytoplasm	enzyme
RAB1B	RAB1B, member RAS oncogene family	Q9H0U4	Q9H0U4	Q9H0U4	-0.091	0.00514	-0.263	0.000271	-0.12	0.178	Cytoplasm	other
RAB1C	RAB1C, member RAS oncogene family pseudogene			Q92928					-0.12	0.178	Other	other
RAB2A	RAB2A, member RAS oncogene family	P61019	P61019	P61019	-0.099	0.305	-0.496	9.02e-06	-0.519	8.83e-07	Cytoplasm	enzyme
RAB5B	RAB5B, member RAS oncogene family		P61020				-0.381	2.97e-08			Cytoplasm	enzyme
RAB5C	RAB5C, member RAS oncogene family	P51148			-0.545	1.28e-08					Cytoplasm	enzyme
RAB7A	RAB7A, member RAS oncogene family	P51149	P51149	P51149	0.074	0.108	-0.1	0.00815	0.126	0.0259	Cytoplasm	enzyme
RAC1	Rac family small GTPase 1	P63000	P63000	P63000	-0.114	0.000599	-0.226	1.04e-06	0.038	0.223	Plasma Membrane	enzyme
RACK1	receptor for activated C kinase 1	P63244	P63244	P63244	-0.072	0.0551	-0.076	0.0178	-0.228	1.4e-06	Cytoplasm	enzyme
RAD23A	RAD23 homolog A, nucleotide excision repair protein	P54725	P54725	P54725	0.029	0.297	0.001	0.211	-0.121	0.23	Nucleus	other
RAD23B	RAD23 homolog B, nucleotide excision repair protein	P54727	P54727	P54727	0.031	0.0845	-0.115	0.00945	-0.011	0.051	Nucleus	other
RALA	RAS like proto-oncogene A	P11233			0.224	0.049					Cytoplasm	enzyme
RAN	RAN, member RAS oncogene family	P62826	P62826	P62826	0.052	0.0691	0.077	0.0576	-0.085	0.00621	Nucleus	enzyme
RAP1A	RAP1A, member of RAS oncogene family	P62834			0.019	0.33					Cytoplasm	enzyme
RAP1B	RAP1B, member of RAS oncogene family		P61224				-0.275	4.54e-05			Cytoplasm	enzyme	unspecified application
RARS1	arginyl-tRNA synthetase 1	P54136	P54136		0.075	0.264	-0.002	0.316			Cytoplasm	enzyme
RASA4	RAS p21 protein activator 4	O43374	O43374		0.112	0.289	-1.279	1.8e-05			Cytoplasm	other
RBBP7	RB binding protein 7, chromatin remodeling factor	Q16576			-0.541	8.41e-05					Nucleus	transcription regulator
RBP4	retinol binding protein 4	P02753			-2.236	1.99e-05					Extracellular Space	other	unspecified application	tinlarebant
RBX1	ring-box 1	P62877			-0.226	5.47e-06					Cytoplasm	enzyme
RDX	radixin	P35241	P35241	P35241	-0.025	0.259	-0.026	0.0594	0.048	0.14	Cytoplasm	other	unspecified application
REEP5	receptor accessory protein 5	Q00765	Q00765		-0.733	0.000458	-0.187	0.121			Extracellular Space	transporter
RHOA	ras homolog family member A	P61586	P61586	P61586	-0.14	0.000141	-0.188	1.67e-05	-0.148	0.000196	Cytoplasm	enzyme
RMDN1	regulator of microtubule dynamics 1	Q96DB5			-0.131	0.285					Cytoplasm	other
RNF7	ring finger protein 7	Q9UBF6	Q9UBF6		0.191	0.0472	0.017	0.352			Nucleus	enzyme
RNF123	ring finger protein 123	Q5XPI4	Q5XPI4	Q5XPI4	0.025	0.0935	-0.003	0.317	-0.873	2.85e-14	Cytoplasm	enzyme
RNF170	ring finger protein 170		Q96K19				-0.651	4.22e-08			Other	other
RNH1	ribonuclease/angiogenin inhibitor 1	P13489	P13489	P13489	-0.013	0.359	-0.01	0.222	-0.025	0.267	Cytoplasm	other
RNPEP	arginyl aminopeptidase	Q9H4A4	Q9H4A4		-0.254	0.00144	0.206	0.0277			Cytoplasm	peptidase
RPIA	ribose 5-phosphate isomerase A	P49247			0.086	0.185					Cytoplasm	enzyme
RPL4	ribosomal protein L4	P36578	P36578	P36578	-0.363	3.55e-05	-0.22	0.000813	-0.17	0.0818	Cytoplasm	enzyme
RPL5	ribosomal protein L5	P46777	P46777		0.024	0.0717	-0.331	0.000369			Cytoplasm	other
RPL6	ribosomal protein L6	Q02878	Q02878	Q02878	-0.142	0.0095	-0.158	0.0189	-0.321	2.32e-05	Nucleus	other	unspecified application
RPL7	ribosomal protein L7	P18124	P18124	P18124	-0.131	0.0678	-0.085	0.0792	-0.412	2.07e-07	Nucleus	transcription regulator
RPL8	ribosomal protein L8	P62917	P62917		0.029	0.271	-0.077	0.228			Cytoplasm	other
RPL9	ribosomal protein L9	P32969	P32969	P32969	-0.131	0.00126	-0.185	0.000178	-0.149	0.00192	Nucleus	other	diagnosis
RPL10	ribosomal protein L10	P27635	P27635		0.015	0.352	-0.194	0.00138			Cytoplasm	translation regulator
RPL11	ribosomal protein L11	P62913	P62913	P62913	-0.675	6.69e-11	-0.185	0.00138	-0.352	6.86e-12	Cytoplasm	other
RPL12	ribosomal protein L12	P30050	P30050	P30050	-0.274	0.000158	-0.172	0.000607	-0.245	0.000641	Nucleus	other
RPL13	ribosomal protein L13	P26373	P26373	P26373	-0.219	0.0106	-0.36	4.58e-09	-0.879	3.09e-12	Nucleus	other
RPL14	ribosomal protein L14	P50914	P50914	P50914	-0.116	0.0809	-0.267	0.000142	-0.192	0.0614	Cytoplasm	other
RPL15	ribosomal protein L15	P61313	P61313	P61313	-0.001	0.34	-0.078	0.169	-0.407	4.91e-05	Cytoplasm	other
RPL17	ribosomal protein L17	P18621	P18621	P18621	-0.099	0.13	-0.414	0.000106	-0.283	0.00165	Cytoplasm	other
RPL18	ribosomal protein L18	Q07020	Q07020	Q07020	-0.363	2.17e-05	-0.343	4.09e-05	-0.246	3.53e-05	Cytoplasm	other
RPL19	ribosomal protein L19		P84098				0.232	0.209			Cytoplasm	other
RPL21	ribosomal protein L21		P46778				-0.794	0.000223			Cytoplasm	other
RPL23	ribosomal protein L23	P62829	P62829	P62829	-0.247	5.61e-06	-0.16	9.32e-06	-0.123	0.0627	Cytoplasm	other
RPL24	ribosomal protein L24	P83731	P83731		-0.352	0.00173	-0.636	1.35e-06			Cytoplasm	other
RPL27	ribosomal protein L27	P61353	P61353		-0.669	2.31e-05	-0.616	5.18e-07			Cytoplasm	other
RPL28	ribosomal protein L28	P46779	P46779		-0.141	0.156	-0.331	0.000218			Cytoplasm	other
RPL29	ribosomal protein L29	P47914			-0.266	0.0154					Cytoplasm	other
RPL30	ribosomal protein L30	P62888	P62888	P62888	-0.213	3.9e-06	-0.504	1.46e-06	-0.293	1.2e-06	Cytoplasm	other
RPL31	ribosomal protein L31	P62899	P62899		-0.173	0.17	-0.172	0.057			Cytoplasm	other
RPL32	ribosomal protein L32	P62910	P62910	P62910	0.047	0.0279	0.035	0.321	-1.625	5.14e-11	Cytoplasm	other
RPL36	ribosomal protein L36	Q9Y3U8	Q9Y3U8	Q9Y3U8	0.005	0.104	-0.243	0.00024	-0.273	0.000101	Cytoplasm	other
RPL38	ribosomal protein L38	P63173			-0.016	0.326					Cytoplasm	other
RPL10A	ribosomal protein L10a	P62906	P62906		-0.132	0.0244	-0.202	0.000383			Nucleus	other
RPL13A	ribosomal protein L13a	P40429	P40429	P40429	-0.156	0.0378	-0.236	0.00385	-0.26	0.00989	Cytoplasm	other
RPL18A	ribosomal protein L18a	Q02543	Q02543		-0.476	6.48e-10	-0.126	0.0714			Cytoplasm	other
RPL23A	ribosomal protein L23a	P62750	P62750		-0.016	0.188	-0.152	0.0527			Cytoplasm	other
RPL27A	ribosomal protein L27a	P46776	P46776	P46776	-0.009	0.362	-0.082	0.0206	-0.995	1.59e-16	Cytoplasm	other
RPL37A	ribosomal protein L37a	P61513	P61513		-0.536	1.12e-06	-0.707	4.27e-08			Cytoplasm	other
RPL3L	ribosomal protein L3 like	Q92901	Q92901		-0.353	0.00055	-0.214	0.0149			Cytoplasm	other
RPL7A	ribosomal protein L7a	P62424	P62424	P62424	-0.06	0.109	0.008	0.0652	-0.062	0.0716	Cytoplasm	other
RPLP0	ribosomal protein lateral stalk subunit P0	P05388	P05388	P05388	-0.06	0.166	-0.191	0.00125	-0.066	0.0345	Cytoplasm	other
RPLP1	ribosomal protein lateral stalk subunit P1	P05386	P05386	P05386	-0.291	4.07e-08	0.017	0.0162	-0.152	0.000373	Cytoplasm	other
RPLP2	ribosomal protein lateral stalk subunit P2	P05387	P05387	P05387	-0.084	0.0528	-0.078	0.057	-0.364	1.92e-08	Cytoplasm	other
RPN1	ribophorin I	P04843	P04843	P04843	-0.166	0.00289	-0.048	0.0323	-0.367	1.27e-08	Cytoplasm	enzyme
RPN2	ribophorin II	P04844	P04844	P04844	-0.02	0.3	-0.185	0.0175	-0.812	1.71e-11	Cytoplasm	enzyme
RPS2	ribosomal protein S2	P15880	P15880	P15880	-0.398	7.51e-07	-0.032	0.221	0.097	0.149	Cytoplasm	other
RPS3	ribosomal protein S3	P23396	P23396	P23396	-0.022	0.0392	-0.058	0.0101	-0.111	0.00685	Cytoplasm	enzyme	unspecified application
RPS5	ribosomal protein S5	P46782	P46782	P46782	-0.054	0.0153	-0.08	0.00205	-0.235	2.29e-06	Cytoplasm	other
RPS6	ribosomal protein S6	P62753	P62753		-0.7	2.62e-07	-0.444	0.000117			Cytoplasm	other	efficacy,response to therapy
RPS7	ribosomal protein S7	P62081	P62081	P62081	-0.024	0.241	-0.023	0.276	-0.099	0.0132	Cytoplasm	other
RPS8	ribosomal protein S8	P62241	P62241	P62241	0.061	0.223	0.032	0.279	-0.007	0.0655	Cytoplasm	other
RPS9	ribosomal protein S9	P46781	P46781		-0.114	0.00142	-0.028	0.0204			Cytoplasm	translation regulator
RPS10	ribosomal protein S10	P46783	P46783	P46783	-0.215	3.97e-06	-0.076	0.0496	-0.138	0.0983	Cytoplasm	other
RPS11	ribosomal protein S11	P62280	P62280		-0.087	0.0322	-0.049	0.214			Cytoplasm	other
RPS12	ribosomal protein S12	P25398	P25398		-0.017	0.273	-0.354	0.00026			Cytoplasm	other		neomycin
RPS13	ribosomal protein S13	P62277	P62277	P62277	-0.101	0.274	-0.443	8.72e-06	-0.094	0.0104	Cytoplasm	other
RPS14	ribosomal protein S14	P62263	P62263	P62263	-0.082	0.00268	-0.088	0.00027	-0.816	4.28e-09	Cytoplasm	translation regulator
RPS15	ribosomal protein S15			P62841					-0.702	4.06e-09	Cytoplasm	other
RPS16	ribosomal protein S16	P62249	P62249		-0.133	0.0482	-0.413	3.41e-11			Cytoplasm	other
RPS18	ribosomal protein S18	P62269	P62269	P62269	-0.056	0.204	-0.052	0.0414	-0.202	3.73e-08	Cytoplasm	other
RPS19	ribosomal protein S19	P39019	P39019		-0.429	2.91e-10	0.015	0.243			Cytoplasm	other
RPS20	ribosomal protein S20		P60866				-0.328	0.00451			Cytoplasm	other
RPS21	ribosomal protein S21	P63220	P63220		-0.067	0.0616	-0.44	9.31e-08			Cytoplasm	other
RPS24	ribosomal protein S24	P62847	P62847	P62847	0.022	0.276	0.003	0.311	-0.647	3.25e-14	Cytoplasm	other	unspecified application
RPS26	ribosomal protein S26	P62854	P62854		-0.179	0.0345	-0.622	4.75e-05			Cytoplasm	other
RPS28	ribosomal protein S28	P62857			-0.145	7.16e-07					Cytoplasm	other
RPS15A	ribosomal protein S15a	P62244	P62244		-0.128	0.0196	-0.076	0.0805			Cytoplasm	other
RPS27A	ribosomal protein S27a	P62979	P62979		-0.012	0.279	0.045	0.236			Cytoplasm	other
RPS3A	ribosomal protein S3A	P61247	P61247		-0.045	0.16	-0.389	0.0249			Nucleus	other
RPS4X	ribosomal protein S4 X-linked	P62701	P62701	P62701	-0.014	0.156	-0.062	0.00439	-0.307	1.15e-12	Cytoplasm	other	diagnosis
RPS6KA3	ribosomal protein S6 kinase A3	P51812	P51812		-0.077	0.249	0.125	0.0108			Cytoplasm	kinase		BI-D1870,fasudil,fluoromethylketone-pyrrolopyrimidine scaffold,LJH685,PMD-026,RMM46
RPSA	ribosomal protein SA	P08865	P08865	P08865	-0.121	0.00372	-0.093	0.0414	-0.21	0.0016	Cytoplasm	translation regulator
RRAGC	Ras related GTP binding C	Q9HB90			-0.443	0.0453					Cytoplasm	enzyme
RRAS	RAS related	P10301			-0.167	0.00897					Cytoplasm	enzyme
RRAS2	RAS related 2	P62070	P62070	P62070	-0.64	4.1e-07	-1.007	5.35e-11	-0.797	4.4e-13	Plasma Membrane	enzyme
RSU1	Ras suppressor protein 1	Q15404		Q15404	-0.279	0.0474			0.065	0.21	Cytoplasm	other
RTCA	RNA 3'-terminal phosphate cyclase	O00442	O00442	O00442	0.041	0.191	-0.014	0.208	-0.035	0.0164	Nucleus	enzyme
RTCB	RNA 2',3'-cyclic phosphate and 5'-OH ligase	Q9Y3I0			-0.491	2.54e-06					Cytoplasm	enzyme
RTN2	reticulon 2	O75298	O75298	O75298	-0.099	0.0067	-0.052	0.115	-0.16	3.77e-05	Cytoplasm	other	unspecified application
RTN4	reticulon 4	Q9NQC3	Q9NQC3	Q9NQC3	-0.199	1.49e-06	-0.192	0.00274	-0.174	0.000386	Cytoplasm	other	diagnosis
RTN4IP1	reticulon 4 interacting protein 1	Q8WWV3			-0.022	0.124					Cytoplasm	enzyme
RTRAF	RNA transcription, translation and transport factor	Q9Y224	Q9Y224	Q9Y224	-0.488	1.33e-07	-0.162	0.187	-0.089	0.31	Nucleus	other
RYR1	ryanodine receptor 1	P21817	P21817	P21817	0.004	0.285	0.003	0.311	-0.047	0.0198	Cytoplasm	ion channel		dantrolene
S100A1	S100 calcium binding protein A1	P23297	P23297	P23297	0.083	0.13	0.082	0.113	0.017	0.278	Cytoplasm	other	diagnosis
S100A4	S100 calcium binding protein A4	P26447	P26447	P26447	-0.099	0.126	-0.685	2.64e-05	-0.81	1.5e-06	Cytoplasm	other	disease progression
S100A6	S100 calcium binding protein A6	P06703	P06703	P06703	-0.558	0.00636	-0.353	0.0574	-0.913	2.95e-08	Cytoplasm	transporter	diagnosis,unspecified application
S100A7	S100 calcium binding protein A7			P31151					-3.148	1.09e-10	Cytoplasm	other	efficacy,unspecified application
S100A8	S100 calcium binding protein A8	P05109			0.57	0.0486					Cytoplasm	other	diagnosis,efficacy,unspecified application
S100A10	S100 calcium binding protein A10	P60903	P60903	P60903	-0.506	5.52e-05	-0.464	8.46e-05	-0.082	0.271	Cytoplasm	other
S100A11	S100 calcium binding protein A11			P31949					-0.534	5.22e-05	Cytoplasm	other
S100A13	S100 calcium binding protein A13	Q99584	Q99584	Q99584	-1.208	0.00201	-1.326	0.00159	-0.648	0.0736	Cytoplasm	other
SAMM50	SAMM50 sorting and assembly machinery component	Q9Y512	Q9Y512	Q9Y512	-0.066	0.024	-0.03	0.162	-0.15	0.000112	Cytoplasm	other
SAR1A	secretion associated Ras related GTPase 1A	Q9NR31	Q9NR31		-0.495	0.000289	-0.343	6.73e-08			Cytoplasm	enzyme
SAR1B	secretion associated Ras related GTPase 1B	Q9Y6B6	Q9Y6B6	Q9Y6B6	0.104	0.00261	0.122	0.00323	-0.037	0.11	Cytoplasm	enzyme
SARS1	seryl-tRNA synthetase 1	P49591	P49591		-0.695	5.83e-10	-0.157	0.161			Cytoplasm	enzyme
SBDS	SBDS ribosome maturation factor	Q9Y3A5	Q9Y3A5	Q9Y3A5	-0.141	0.0196	-0.062	0.151	-0.785	4.47e-15	Nucleus	other
SCCPDH	saccharopine dehydrogenase (putative)	Q8NBX0	Q8NBX0	Q8NBX0	-0.049	0.031	0.025	0.334	-0.183	2.04e-05	Cytoplasm	other
SCRN3	secernin 3	Q0VDG4			-0.282	0.00963					Other	other
SDHA	succinate dehydrogenase complex flavoprotein subunit A	P31040	P31040	P31040	-0.001	0.334	0.013	0.339	-0.06	0.124	Cytoplasm	enzyme
SDHB	succinate dehydrogenase complex iron sulfur subunit B	P21912	P21912	P21912	0.02	0.289	-0.012	0.218	-0.079	0.0114	Cytoplasm	enzyme
SDHC	succinate dehydrogenase complex subunit C	Q99643	Q99643	Q99643	-0.09	0.193	0.083	0.0536	-0.521	5.45e-15	Cytoplasm	enzyme
SDHD	succinate dehydrogenase complex subunit D	O14521	O14521	O14521	-0.52	1.31e-07	0.018	0.227	-0.705	1.68e-16	Cytoplasm	enzyme		hexachlorophene
SDR39U1	short chain dehydrogenase/reductase family 39U member 1	Q9NRG7	Q9NRG7	Q9NRG7	-0.078	0.285	0	0.309	-0.404	1.2e-05	Nucleus	other
SEC22B	SEC22 homolog B, vesicle trafficking protein	O75396			-0.976	1.76e-06					Cytoplasm	other
SEC23A	SEC23 homolog A, COPII coat complex component	Q15436	Q15436		-1.168	6e-09	-0.122	0.181			Cytoplasm	transporter
SEC24C	SEC24 homolog C, COPII coat complex component	P53992			-0.125	0.068					Cytoplasm	transporter
SELENBP1	selenium binding protein 1	Q13228	Q13228	Q13228	0.139	0.00481	0.176	0.000526	0.272	2.34e-07	Cytoplasm	enzyme
SELENOW	selenoprotein W	P63302			0.497	0.000964					Cytoplasm	enzyme
SENP8	SUMO peptidase family member, NEDD8 specific	Q96LD8			-0.114	0.255					Cytoplasm	peptidase
SERBP1	SERPINE1 mRNA binding protein 1	Q8NC51	Q8NC51		-0.04	0.341	-0.428	0.000211			Cytoplasm	translation regulator
SERPINA1	serpin family A member 1	P01009	P01009	P01009	0.215	0.00176	0.223	0.00145	0.049	0.199	Extracellular Space	other	diagnosis,unspecified application
SERPINA3	serpin family A member 3	P01011	P01011	P01011	0.22	0.0354	0.264	0.00319	-0.296	0.0028	Extracellular Space	other	unspecified application
SERPINB1	serpin family B member 1	P30740	P30740	P30740	-0.394	3.36e-06	-0.301	0.000212	-0.347	2.36e-09	Cytoplasm	other
SERPINB6	serpin family B member 6	P35237	P35237	P35237	-0.124	0.0373	-0.157	0.00121	-0.175	0.00103	Cytoplasm	other
SERPINC1	serpin family C member 1	P01008	P01008	P01008	0.069	0.168	0.009	0.288	-0.181	0.0526	Extracellular Space	enzyme	diagnosis,unspecified application	ardeparin,aspirin/enoxaparin,aspirin/eptifibatide/heparin,dalteparin,enoxaparin,enoxaparin/warfarin,fondaparinux,fondaparinux/warfarin,glucuronyl glucosamine glycan sulfate,heparin,low molecular weight heparin,nadroparin,semuloparin,SR-123781A
SERPIND1	serpin family D member 1	P05546	P05546	P05546	0.198	0.0494	0.191	0.00929	0.282	0.0754	Extracellular Space	other	disease progression	ardeparin,glucuronyl glucosamine glycan sulfate
SERPINF1	serpin family F member 1			P36955					0.223	0.0405	Extracellular Space	other
SERPINF2	serpin family F member 2	P08697	P08697	P08697	0.146	0.0898	0.116	0.105	-0.453	2.58e-06	Extracellular Space	other
SERPING1	serpin family G member 1	P05155	P05155	P05155	0.374	0.0105	0.16	0.13	0.169	0.171	Extracellular Space	other
SESN1	sestrin 1	Q9Y6P5			0.005	0.354					Nucleus	other
SETD7	SET domain containing 7, histone lysine methyltransferase	Q8WTS6			-0.146	0.249					Nucleus	enzyme
SGCA	sarcoglycan alpha	Q16586	Q16586	Q16586	-0.16	0.00213	-0.262	3.81e-05	-0.271	1.66e-05	Plasma Membrane	other
SGCB	sarcoglycan beta	Q16585	Q16585		-0.24	1.97e-07	-0.287	2.78e-05			Plasma Membrane	other
SGCD	sarcoglycan delta	Q92629	Q92629	Q92629	-0.11	0.000345	-0.186	2.27e-07	-0.094	7.3e-05	Cytoplasm	other
SGCG	sarcoglycan gamma	Q13326	Q13326	Q13326	-0.083	0.131	-0.249	0.000409	-0.766	3.03e-09	Plasma Membrane	other
SH3BGR	SH3 domain binding glutamate rich protein	P55822	P55822	P55822	0.039	0.0652	0.001	0.334	-0.06	0.00058	Cytoplasm	other
SIRT3	sirtuin 3	Q9NTG7			0.04	0.0255					Cytoplasm	enzyme
SIRT5	sirtuin 5	Q9NXA8	Q9NXA8		-0.177	0.013	-0.232	0.0068			Cytoplasm	enzyme		suramin
SKP1	S-phase kinase associated protein 1	P63208			-0.505	1.56e-06					Nucleus	transcription regulator
SLC16A1	solute carrier family 16 member 1	P53985	P53985	P53985	-0.007	0.196	-0.369	0.00417	0.375	0.0404	Plasma Membrane	transporter	diagnosis	AZD-3965
SLC16A3	solute carrier family 16 member 3	O15427	O15427	O15427	-0.071	0.227	0.008	0.282	-1.132	4.19e-12	Plasma Membrane	transporter
SLC25A3	solute carrier family 25 member 3	Q00325	Q00325	Q00325	-0.105	0.0215	-0.084	0.0485	-0.042	0.191	Cytoplasm	transporter
SLC25A4	solute carrier family 25 member 4	P12235	P12235	P12235	-0.025	0.227	-0.017	0.33	-0.206	5.38e-05	Cytoplasm	transporter		clodronic acid
SLC25A5	solute carrier family 25 member 5	P05141			0.076	0.111					Cytoplasm	transporter		clodronic acid
SLC25A6	solute carrier family 25 member 6	P12236	P12236	P12236	-0.043	0.226	-0.022	0.285	-0.121	0.0165	Cytoplasm	transporter		clodronic acid
SLC25A11	solute carrier family 25 member 11	Q02978	Q02978	Q02978	-0.019	0.267	-0.014	0.264	-0.092	0.0345	Cytoplasm	transporter
SLC25A12	solute carrier family 25 member 12	O75746	O75746	O75746	0.03	0.211	0.03	0.245	-0.041	0.139	Cytoplasm	transporter
SLC25A20	solute carrier family 25 member 20	O43772	O43772	O43772	0.074	0.341	-0.178	0.0107	0.254	0.00603	Cytoplasm	transporter
SLC25A42	solute carrier family 25 member 42	Q86VD7	Q86VD7		-0.157	0.239	-1.254	5.23e-10			Cytoplasm	transporter
SLC27A1	solute carrier family 27 member 1	Q6PCB7			-0.031	0.0284					Plasma Membrane	transporter
SLC29A1	solute carrier family 29 member 1 (Augustine blood group)	Q99808	Q99808		0.039	0.241	-0.325	0.00706			Plasma Membrane	transporter	efficacy,response to therapy	cannabidiol,ticagrelor
SLC2A1	solute carrier family 2 member 1	P11166	P11166	P11166	0.115	0.194	-0.063	0.22	-0.781	1.18e-05	Plasma Membrane	transporter	diagnosis,efficacy	alogliptin/INS/metformin,alogliptin/metformin,alogliptin/metformin/pioglitazone,BAY-876,canagliflozin/metformin,canakinumab/metformin,canakinumab/metformin/sulfonylurea,dapagliflozin/INS/metformin,dapagliflozin/metformin,dapagliflozin/metformin/saxagliptin,empagliflozin/linagliptin/metformin,empagliflozin/metformin,ertugliflozin/metformin,exenatide/INS/metformin,exenatide/INS/metformin/pioglitazo…
SLC2A4	solute carrier family 2 member 4	P14672			-0.125	0.00249					Plasma Membrane	transporter	unspecified application	alogliptin/INS/metformin,alogliptin/metformin,alogliptin/metformin/pioglitazone,canagliflozin/metformin,canakinumab/metformin,canakinumab/metformin/sulfonylurea,dapagliflozin/INS/metformin,dapagliflozin/metformin,dapagliflozin/metformin/saxagliptin,empagliflozin/linagliptin/metformin,empagliflozin/metformin,ertugliflozin/metformin,exenatide/INS/metformin,exenatide/INS/metformin/pioglitazone,exena…
SLC35B1	solute carrier family 35 member B1	P78383			-0.194	0.369					Cytoplasm	transporter
SLC37A4	solute carrier family 37 member 4	O43826	O43826	O43826	-0.751	0.000285	-0.365	0.00853	0.022	0.152	Cytoplasm	transporter
SLC41A3	solute carrier family 41 member 3	Q96GZ6			0.009	0.31					Plasma Membrane	transporter
SLC4A1	solute carrier family 4 member 1 (Diego blood group)	P02730	P02730	P02730	0.12	0.24	0.114	0.236	-0.361	0.0172	Plasma Membrane	transporter
SLIRP	SRA stem-loop interacting RNA binding protein	Q9GZT3			-0.48	0.061					Cytoplasm	other
SLMAP	sarcolemma associated protein	Q14BN4	Q14BN4	Q14BN4	-0.028	0.0985	-0.63	2.14e-05	-0.216	0.00816	Plasma Membrane	other
SMDT1	single-pass membrane protein with aspartate rich tail 1		Q9H4I9				-0.058	0.344			Extracellular Space	other
SMIM20	small integral membrane protein 20	Q8N5G0			-1.236	2.73e-11					Cytoplasm	other
SMPX	small muscle protein X-linked	Q9UHP9	Q9UHP9	Q9UHP9	-0.167	0.0024	-0.231	2.48e-07	-0.706	2.04e-14	Cytoplasm	other
SMTN	smoothelin		P53814				0.022	0.27			Extracellular Space	other	unspecified application
SMTNL1	smoothelin like 1	A8MU46	A8MU46	A8MU46	-0.117	0.073	-0.022	0.317	-0.039	0.0976	Cytoplasm	other
SMTNL2	smoothelin like 2	Q2TAL5	Q2TAL5	Q2TAL5	-0.073	0.181	-0.199	0.000103	-0.465	8.21e-06	Other	other
SMYD1	SET and MYND domain containing 1	Q8NB12	Q8NB12	Q8NB12	-0.043	0.117	-0.062	0.0139	0.007	0.287	Nucleus	transcription regulator
SNCA	synuclein alpha	P37840	P37840	P37840	-0.078	0.359	-0.169	0.138	-1.254	3e-07	Cytoplasm	enzyme	diagnosis,disease progression,prognosis
SNRPB	small nuclear ribonucleoprotein polypeptides B and B1		P14678				-0.908	3.04e-12			Nucleus	other
SNRPD3	small nuclear ribonucleoprotein D3 polypeptide	P62318	P62318		-0.088	0.136	-0.062	0.164			Nucleus	other
SNRPF	small nuclear ribonucleoprotein polypeptide F	P62306			-0.312	0.187					Nucleus	other
SNRPN	small nuclear ribonucleoprotein polypeptide N		P63162				-0.908	3.04e-12			Nucleus	other
SNTA1	syntrophin alpha 1	Q13424	Q13424	Q13424	-0.05	0.0709	-0.102	0.0427	-0.41	1.82e-10	Plasma Membrane	other
SNTB1	syntrophin beta 1	Q13884	Q13884	Q13884	-0.283	0.000114	-0.768	3.06e-07	-0.595	4.37e-07	Plasma Membrane	other
SNTB2	syntrophin beta 2	Q13425			0.03	0.0757					Plasma Membrane	other
SNX3	sorting nexin 3	O60493			-0.559	1.33e-07					Cytoplasm	transporter
SOD1	superoxide dismutase 1	P00441	P00441	P00441	0.053	0.0147	0.035	0.0435	-0.113	0.00101	Cytoplasm	enzyme	unspecified application	tofersen
SOD2	superoxide dismutase 2	P04179	P04179	P04179	-0.069	0.131	-0.068	0.117	0.211	0.0372	Cytoplasm	enzyme	diagnosis,unspecified application	manganese
SORBS1	sorbin and SH3 domain containing 1	Q9BX66			0.009	0.259					Plasma Membrane	other
SORD	sorbitol dehydrogenase		Q00796				0.482	0.0173			Cytoplasm	enzyme
SPEG	striated muscle enriched protein kinase	Q15772	Q15772		0.007	0.316	-0.153	0.002			Nucleus	kinase
SPR	sepiapterin reductase	P35270	P35270	P35270	-0.004	0.112	0.145	0.0742	-0.206	0.0499	Cytoplasm	enzyme
SPTA1	spectrin alpha, erythrocytic 1	P02549	P02549	P02549	-0.027	0.338	0.029	0.342	-0.628	0.000344	Cytoplasm	other
SPTAN1	spectrin alpha, non-erythrocytic 1	Q13813	Q13813		-0.175	0.0433	-0.282	0.00414			Plasma Membrane	other
SPTB	spectrin beta, erythrocytic	P11277	P11277	P11277	-0.029	0.238	-0.011	0.355	-0.215	0.00599	Plasma Membrane	other
SPTBN1	spectrin beta, non-erythrocytic 1	Q01082	Q01082	Q01082	-0.392	0.000456	-0.314	0.000865	-0.39	3.72e-08	Plasma Membrane	other
SQSTM1	sequestosome 1	Q13501			-0.247	7.08e-09					Cytoplasm	transcription regulator
SRI	sorcin	P30626			-1.175	2.52e-09					Cytoplasm	transporter
SRL	sarcalumenin	Q86TD4	Q86TD4	Q86TD4	-0.034	0.0749	-0.046	0.0199	-0.07	0.00301	Cytoplasm	other
SRP14	signal recognition particle 14	P37108	P37108		-0.291	0.00423	-0.669	1.93e-06			Cytoplasm	other
SRPRB	SRP receptor subunit beta	Q9Y5M8			0.114	0.185					Cytoplasm	other
SSBP1	single stranded DNA binding protein 1	Q04837	Q04837	Q04837	-0.345	1.9e-08	-0.066	0.088	-0.251	0.000156	Cytoplasm	other
SSPN	sarcospan	Q14714			-0.314	0.000275					Plasma Membrane	other
ST13	ST13 Hsp70 interacting protein	P50502	P50502	P50502	0.06	0.0443	0.093	0.00436	-0.036	0.117	Cytoplasm	other
STAC3	SH3 and cysteine rich domain 3	Q96MF2	Q96MF2		-0.523	2.22e-05	-0.542	3.42e-05			Extracellular Space	other
STBD1	starch binding domain 1	O95210	O95210	O95210	-0.115	0.0191	-0.128	0.00296	-0.002	0.329	Cytoplasm	other
STIM1	stromal interaction molecule 1		Q13586				-0.577	2.54e-07			Plasma Membrane	ion channel
STIP1	stress induced phosphoprotein 1	P31948	P31948	P31948	-0.123	0.000315	0.02	0.189	-0.116	0.0683	Cytoplasm	other		lavendustin C
STOM	stomatin	P27105	P27105	P27105	0.066	0.232	-0.144	0.227	-0.681	1.74e-05	Plasma Membrane	other
STOML2	stomatin like 2	Q9UJZ1			-0.153	0.000151					Plasma Membrane	other	prognosis
STRAP	serine/threonine kinase receptor associated protein	Q9Y3F4	Q9Y3F4		0.012	0.342	-0.612	6.13e-09			Plasma Membrane	other
STT3B	STT3 oligosaccharyltransferase complex catalytic subunit B	Q8TCJ2			0.089	0.112					Cytoplasm	enzyme
STUB1	STIP1 homology and U-box containing protein 1		Q9UNE7				-0.043	0.00142			Cytoplasm	enzyme
SUCLA2	succinate-CoA ligase ADP-forming subunit beta	Q9P2R7	Q9P2R7	Q9P2R7	0.012	0.323	0.033	0.208	-0.058	0.075	Cytoplasm	enzyme
SUCLG1	succinate-CoA ligase GDP/ADP-forming subunit alpha	P53597	P53597	P53597	-0.002	0.339	-0.035	0.324	-0.144	0.0205	Cytoplasm	enzyme
SUCLG2	succinate-CoA ligase GDP-forming subunit beta	Q96I99	Q96I99	Q96I99	-0.18	0.000365	-0.318	0.00113	-0.312	3.41e-05	Cytoplasm	enzyme
SUN2	Sad1 and UNC84 domain containing 2	Q9UH99	Q9UH99		0.058	0.233	-0.496	4.84e-06			Nucleus	other
SURF4	surfeit 4	O15260		O15260	-0.153	0.00604			0.224	0.184	Cytoplasm	other
SVIL	supervillin	O95425	O95425	O95425	-0.268	3.58e-07	-0.348	1.66e-05	-0.358	4.07e-07	Plasma Membrane	other
SYNCRIP	synaptotagmin binding cytoplasmic RNA interacting protein	O60506	O60506		-0.563	4.92e-07	-0.028	0.24			Nucleus	other		supinoxin
SYNE1	spectrin repeat containing nuclear envelope protein 1		Q8NF91				-0.109	0.00319			Nucleus	other
SYNE2	spectrin repeat containing nuclear envelope protein 2	Q8WXH0	Q8WXH0		-0.051	0.325	-0.18	0.288			Nucleus	other
SYNGR2	synaptogyrin 2	O43760			0.467	0.0147					Cytoplasm	other
SYNJ2BP	synaptojanin 2 binding protein	P57105	P57105		-0.738	2.25e-07	0.194	0.229			Cytoplasm	other
SYNM	synemin	O15061	O15061	O15061	0.033	0.16	0.018	0.247	-0.032	0.0821	Cytoplasm	other
SYNPO	synaptopodin	Q8N3V7	Q8N3V7	Q8N3V7	-0.05	0.258	-0.031	0.299	-0.176	1.43e-06	Cytoplasm	other
SYNPO2	synaptopodin 2	Q9UMS6	Q9UMS6	Q9UMS6	-0.054	0.106	-0.083	0.0209	0.021	0.331	Cytoplasm	other
SYNPO2L	synaptopodin 2 like	Q9H987	Q9H987	Q9H987	-0.018	0.147	0.022	0.334	-0.057	0.0325	Cytoplasm	other
SYPL2	synaptophysin like 2	Q5VXT5	Q5VXT5	Q5VXT5	0.117	0.105	0.113	0.115	-0.106	0.00879	Other	other
TACO1	translational activator of cytochrome c oxidase I		Q9BSH4				-0.276	0.0593			Cytoplasm	other
TAGLN	transgelin	Q01995	Q01995	Q01995	-0.985	3.66e-08	-1.271	2.81e-08	0.7	0.179	Cytoplasm	other	diagnosis
TAGLN2	transgelin 2	P37802	P37802	P37802	-0.532	8.81e-08	-0.248	0.00985	0.054	0.176	Cytoplasm	other
TALDO1	transaldolase 1	P37837	P37837	P37837	-0.261	1.51e-05	-0.359	3.25e-07	-0.436	2.25e-08	Cytoplasm	enzyme
TARDBP	TAR DNA binding protein		Q13148				-0.525	1.03e-06			Nucleus	transcription regulator	unspecified application
TATDN1	TatD DNase domain containing 1		Q6P1N9				0.228	0.0879			Extracellular Space	other
TBC1D17	TBC1 domain family member 17	Q9HA65			-0.22	2.93e-06					Cytoplasm	other
TBCA	tubulin folding cofactor A	O75347			0.171	0.369					Cytoplasm	other
TCAP	titin-cap	O15273	O15273	O15273	-0.081	0.0214	-0.063	0.121	-0.046	0.0219	Cytoplasm	other
TCP1	t-complex 1	P17987	P17987	P17987	-0.07	0.0694	-0.195	0.0038	-0.691	3.25e-12	Cytoplasm	other
TECR	trans-2,3-enoyl-CoA reductase	Q9NZ01	Q9NZ01		-0.239	0.0689	-0.361	0.00139			Plasma Membrane	enzyme
TF	transferrin	P02787	P02787	P02787	0.171	0.0045	0.168	0.00768	-0.074	0.1	Extracellular Space	transporter	efficacy,prognosis,safety,unspecified application	ferric carboxymaltose,MORAb-066,NKP-1339,platinum,TLD-1433
TFAM	transcription factor A, mitochondrial	Q00059	Q00059		0.021	0.0131	-0.422	3.6e-07			Cytoplasm	transcription regulator
TGFBI	transforming growth factor beta induced	Q15582	Q15582	Q15582	-0.222	0.0808	-0.186	0.207	0.361	0.0449	Extracellular Space	other
TGM2	transglutaminase 2	P21980	P21980		-0.297	6.07e-05	-0.304	0.000381			Cytoplasm	enzyme
THBS1	thrombospondin 1	P07996			0.109	0.287					Extracellular Space	other	diagnosis,efficacy
THEM6	thioesterase superfamily member 6	Q8WUY1			-0.245	0.00193					Other	other
TIMM13	translocase of inner mitochondrial membrane 13	Q9Y5L4	Q9Y5L4	Q9Y5L4	-0.107	0.0471	-0.198	4.43e-05	-0.099	0.0569	Cytoplasm	transporter
TIMM44	translocase of inner mitochondrial membrane 44		O43615				-0.086	0.0746			Cytoplasm	transporter
TIMM50	translocase of inner mitochondrial membrane 50	Q3ZCQ8	Q3ZCQ8	Q3ZCQ8	-0.554	9.28e-09	-0.249	6.58e-06	-0.99	2.95e-18	Cytoplasm	phosphatase
TIMM8A	translocase of inner mitochondrial membrane 8A	O60220			-0.29	0.000272					Cytoplasm	transporter
TINAGL1	tubulointerstitial nephritis antigen like 1	Q9GZM7	Q9GZM7	Q9GZM7	-0.445	7.76e-08	-0.445	1.8e-05	0.735	8.44e-05	Extracellular Space	transporter
TIPRL	TOR signaling pathway regulator	O75663			-0.286	0.000143					Cytoplasm	other
TLN1	talin 1	Q9Y490	Q9Y490	Q9Y490	-0.068	0.267	-0.079	0.332	-0.038	0.26	Plasma Membrane	other	unspecified application
TLN2	talin 2	Q9Y4G6	Q9Y4G6	Q9Y4G6	-0.054	0.1	0.154	0.134	0.154	0.103	Nucleus	other
TMA7	translation machinery associated 7 homolog	Q9Y2S6	Q9Y2S6		-0.472	3.71e-06	-0.735	2.7e-08			Other	other
TMCO1	transmembrane and coiled-coil domains 1	Q9UM00	Q9UM00		0.014	0.338	0.076	0.322			Cytoplasm	ion channel
TMED2	transmembrane p24 trafficking protein 2		Q15363				-0.167	0.0065			Cytoplasm	transporter
TMED9	transmembrane p24 trafficking protein 9	Q9BVK6			-0.219	0.00747					Cytoplasm	transporter
TMED10	transmembrane p24 trafficking protein 10	P49755			0.131	0.181					Cytoplasm	transporter
TMEM11	transmembrane protein 11	P17152	P17152		-0.208	4.04e-06	-0.135	6.22e-05			Plasma Membrane	G-protein coupled receptor
TMEM43	transmembrane protein 43		Q9BTV4				-0.266	0.0602			Nucleus	other
TMEM109	transmembrane protein 109	Q9BVC6			-0.254	0.0024					Cytoplasm	ion channel
TMEM143	transmembrane protein 143	Q96AN5	Q96AN5	Q96AN5	-0.041	0.112	0.066	0.184	-0.045	0.284	Cytoplasm	other
TMEM205	transmembrane protein 205	Q6UW68		Q6UW68	-0.442	4.49e-05			-0.757	1.45e-16	Cytoplasm	other
TMEM126A	transmembrane protein 126A	Q9H061	Q9H061		-0.164	0.00419	-0.449	7.12e-06			Cytoplasm	other
TMEM14C	transmembrane protein 14C	Q9P0S9	Q9P0S9	Q9P0S9	-0.022	0.117	-0.021	0.224	-0.35	1.57e-09	Plasma Membrane	other
TMEM38A	transmembrane protein 38A	Q9H6F2	Q9H6F2	Q9H6F2	-0.033	0.241	-0.051	0.172	-0.231	3.09e-08	Cytoplasm	ion channel
TMLHE	trimethyllysine hydroxylase, epsilon	Q9NVH6			-0.443	0.000584					Cytoplasm	enzyme
TMOD1	tropomodulin 1	P28289	P28289	P28289	0.018	0.202	-0.208	1.49e-05	-0.1	0.000853	Cytoplasm	enzyme
TMOD4	tropomodulin 4	Q9NZQ9	Q9NZQ9	Q9NZQ9	-0.089	7.42e-05	-0.058	0.00126	0.042	0.26	Other	other
TMSB10/TMSB4X	thymosin beta 4 X-linked	P62328	P62328	P62328	-0.075	0.364	0.034	0.343	-0.488	3.43e-07	Cytoplasm	other	diagnosis
TMT1A	thiol methyltransferase 1A	Q9H8H3	Q9H8H3	Q9H8H3	0.449	2.29e-05	0.573	1.47e-09	0.108	0.125	Cytoplasm	enzyme
TMX2	thioredoxin related transmembrane protein 2	Q9Y320			-0.168	0.0269					Other	enzyme
TMX4	thioredoxin related transmembrane protein 4	Q9H1E5	Q9H1E5		-0.137	0.0058	-0.528	8.27e-10			Cytoplasm	enzyme
TNNC1	troponin C1, slow skeletal and cardiac type	P63316	P63316	P63316	-0.289	0.0994	-0.226	0.132	-0.222	0.0762	Cytoplasm	other		Ca2+,levosimendan
TNNC2	troponin C2, fast skeletal type	P02585	P02585	P02585	-0.104	0.251	-0.064	0.273	-0.15	0.116	Cytoplasm	other	unspecified application	Ca2+
TNNI1	troponin I1, slow skeletal type	P19237	P19237	P19237	-0.029	0.292	-0.018	0.309	0.043	0.173	Cytoplasm	other
TNNI2	troponin I2, fast skeletal type	P48788	P48788	P48788	-0.018	0.349	-0.017	0.346	-0.034	0.108	Cytoplasm	enzyme	unspecified application
TNNT1	troponin T1, slow skeletal type	P13805	P13805	P13805	-0.086	0.0858	-0.098	0.0464	0.004	0.332	Cytoplasm	other	unspecified application
TNNT3	troponin T3, fast skeletal type	P45378	P45378	P45378	-0.028	0.233	-0.053	0.178	-0.101	0.0317	Cytoplasm	other
TNXB	tenascin XB	P22105	P22105		-0.52	0.0157	0.144	0.294			Extracellular Space	other
TOLLIP	toll interacting protein	Q9H0E2			-0.556	7.44e-11					Cytoplasm	other
TOM1	target of myb1 membrane trafficking protein	O60784	O60784	O60784	-0.377	2.55e-06	-0.332	2.83e-05	-0.39	8.24e-07	Cytoplasm	transporter
TOMM22	translocase of outer mitochondrial membrane 22	Q9NS69	Q9NS69		-0.127	0.00984	0.047	0.263			Cytoplasm	transporter
TOMM40	translocase of outer mitochondrial membrane 40			O96008					-0.34	0.00771	Cytoplasm	ion channel
TOMM70	translocase of outer mitochondrial membrane 70	O94826	O94826	O94826	-0.137	0.000176	-0.066	0.00977	0.343	0.000555	Cytoplasm	transporter
TPI1	triosephosphate isomerase 1	P60174	P60174	P60174	-0.083	0.0206	-0.078	0.0238	-0.196	1.09e-08	Cytoplasm	enzyme	diagnosis,unspecified application
TPM1	tropomyosin 1	P09493	P09493	P09493	-0.031	0.204	-0.038	0.196	-0.082	0.0413	Cytoplasm	other	diagnosis
TPM2	tropomyosin 2	P07951	P07951	P07951	-0.035	0.219	-0.016	0.358	-0.006	0.331	Extracellular Space	other	diagnosis
TPM3	tropomyosin 3	P06753	P06753	P06753	-0.04	0.285	-0.042	0.271	0.039	0.2	Cytoplasm	other	diagnosis,unspecified application	AZD-7451
TPM4	tropomyosin 4	P67936		P67936	-0.134	0.064			-0.156	0.00136	Cytoplasm	other
TPP1	tripeptidyl peptidase 1	O14773	O14773		-0.389	0.00669	-0.534	0.00047			Cytoplasm	peptidase
TPP2	tripeptidyl peptidase 2	P29144	P29144		0.121	0.338	-0.451	2.68e-10			Cytoplasm	peptidase
TPPP3	tubulin polymerization promoting protein family member 3			Q9BW30					0.492	0.2	Cytoplasm	other
TPSAB1/TPSB2	tryptase alpha/beta 1	P20231	P20231	P20231	-0.722	0.000187	-0.472	0.0128	-0.02	0.266	Extracellular Space	peptidase
TPT1	tumor protein, translationally-controlled 1	P13693	P13693	P13693	-0.054	0.0335	-0.053	0.0161	-0.028	0.152	Cytoplasm	other
TRAP1	TNF receptor associated protein 1	Q12931	Q12931		-0.299	0.0223	-0.339	0.00229			Cytoplasm	enzyme		gamitrinib-TPP-OH
TRDN	triadin	Q13061	Q13061		-0.108	0.043	-0.837	5.01e-08			Cytoplasm	other
TRIM54	tripartite motif containing 54	Q9BYV2	Q9BYV2		0.457	0.000842	0.195	0.143			Cytoplasm	other
TRIM72	tripartite motif containing 72	Q6ZMU5	Q6ZMU5	Q6ZMU5	-0.035	0.0261	-0.036	0.028	-0.095	3.88e-07	Cytoplasm	enzyme
TRIP10	thyroid hormone receptor interactor 10	Q15642	Q15642	Q15642	0.077	0.0868	-0.241	4.13e-07	-0.452	1.15e-09	Cytoplasm	other
TSPO	translocator protein	P30536	P30536	P30536	-0.249	0.00056	-0.279	0.000184	-0.436	1.99e-08	Cytoplasm	transmembrane receptor		alprazolam,CGS-8216,chlordiazepoxide,clonazepam,clorazepate,dexamethasone/olanzapine,diazepinomicin,estazolam,eszopiclone,flumazenil,flunitrazepam,fluoxetine/olanzapine,flurazepam,lorazepam,midazolam,olanzapine,PK 11195,SSR180575,temazepam,triazolam,zaleplon,zolpidem
TST	thiosulfate sulfurtransferase	Q16762	Q16762	Q16762	-0.281	0.00171	-0.224	0.000349	0.17	0.119	Cytoplasm	enzyme
TTN	titin	Q8WZ42	Q8WZ42	Q8WZ42	0.002	0.223	0.002	0.249	0.033	0.0103	Cytoplasm	kinase
TTR	transthyretin	P02766	P02766	P02766	0.123	0.0873	0.176	0.0275	0.059	0.342	Extracellular Space	transporter	diagnosis,efficacy,prognosis,unspecified application	4'-iodo-4'-deoxydoxorubicin,acoramidis,inotersen,IONIS-TTR Rx,patisiran,tafamidis,vutrisiran
TUBA8	tubulin alpha 8	Q9NY65	Q9NY65	Q9NY65	0.09	0.0343	-0.005	0.323	-0.056	0.121	Cytoplasm	other		6-mercaptopurine/vincristine,bevacizumab/docetaxel,bevacizumab/docetaxel/prednisone/thalidomide/zoledronic acid,bevacizumab/paclitaxel,bevacizumab/paclitaxel/pemetrexed,bevacizumab/paclitaxel/topotecan,capecitabine/docetaxel,capecitabine/docetaxel/gemcitabine,capecitabine/docetaxel/oxaliplatin/trastuzumab,cevipabulin,colchicine,colchicine/probenecid,cyclophosphamide/daunorubicin/imatinib/predniso…
TUBA1A	tubulin alpha 1a	Q71U36		Q71U36	-0.117	0.00174			-0.058	0.0621	Cytoplasm	other	unspecified application	6-mercaptopurine/vincristine,bevacizumab/docetaxel,bevacizumab/docetaxel/prednisone/thalidomide/zoledronic acid,bevacizumab/paclitaxel,bevacizumab/paclitaxel/pemetrexed,bevacizumab/paclitaxel/topotecan,capecitabine/docetaxel,capecitabine/docetaxel/gemcitabine,capecitabine/docetaxel/oxaliplatin/trastuzumab,cevipabulin,colchicine,colchicine/probenecid,cyclophosphamide/daunorubicin/imatinib/predniso…
TUBA1B	tubulin alpha 1b		P68363				-0.124	0.000791			Cytoplasm	enzyme	diagnosis,efficacy
TUBA4A	tubulin alpha 4a	P68366	P68366	P68366	-0.09	0.024	-0.098	0.00937	-0.348	5.04e-06	Cytoplasm	other		6-mercaptopurine/vincristine,bevacizumab/docetaxel,bevacizumab/docetaxel/prednisone/thalidomide/zoledronic acid,bevacizumab/paclitaxel,bevacizumab/paclitaxel/pemetrexed,bevacizumab/paclitaxel/topotecan,cabazitaxel,cabazitaxel/prednisolone,cabazitaxel/prednisone,capecitabine/docetaxel,capecitabine/docetaxel/gemcitabine,capecitabine/docetaxel/oxaliplatin/trastuzumab,cevipabulin,colchicine,colchicin…
TUBB	tubulin beta class I	P07437	P07437	P07437	-0.156	0.00229	-0.19	0.000581	-0.057	0.215	Cytoplasm	other	efficacy	allopurinol/colchicine,anakinra/colchicine,canakinumab/colchicine,colchicine,ixabepilone
TUBB6	tubulin beta 6 class V	Q9BUF5	Q9BUF5		-0.736	0.00153	-0.934	1.44e-08			Cytoplasm	other
TUBB2A	tubulin beta 2A class IIa	Q13885	Q13885	Q13885	-0.097	0.00468	-0.372	0.000472	-0.246	0.00011	Cytoplasm	other		6-mercaptopurine/vincristine,ABT-751,batabulin,bevacizumab/docetaxel,bevacizumab/docetaxel/prednisone/thalidomide/zoledronic acid,bevacizumab/paclitaxel,bevacizumab/paclitaxel/pemetrexed,bevacizumab/paclitaxel/topotecan,BMS-275183,capecitabine/docetaxel,capecitabine/docetaxel/gemcitabine,capecitabine/docetaxel/oxaliplatin/trastuzumab,cevipabulin,colchicine,colchicine/probenecid,crolibulin,cycloph…
TUBB4B	tubulin beta 4B class IVb	P68371	P68371	P68371	-0.079	0.0112	-0.087	0.00505	-0.108	0.000858	Cytoplasm	other	unspecified application	6-mercaptopurine/vincristine,ABT-751,bevacizumab/docetaxel,bevacizumab/docetaxel/prednisone/thalidomide/zoledronic acid,bevacizumab/paclitaxel,bevacizumab/paclitaxel/pemetrexed,bevacizumab/paclitaxel/topotecan,BMS-275183,capecitabine/docetaxel,capecitabine/docetaxel/gemcitabine,capecitabine/docetaxel/oxaliplatin/trastuzumab,cevipabulin,colchicine,colchicine/probenecid,cyclophosphamide/daunorubici…
TUFM	Tu translation elongation factor, mitochondrial	P49411	P49411	P49411	-0.026	0.268	0.003	0.335	-0.1	0.00881	Cytoplasm	translation regulator
TWF2	twinfilin actin binding protein 2	Q6IBS0	Q6IBS0		0.022	0.156	-0.127	0.0667			Cytoplasm	kinase
TXLNB	taxilin beta	Q8N3L3	Q8N3L3	Q8N3L3	-0.083	0.0677	-0.155	4.28e-06	-0.486	2.17e-08	Cytoplasm	other
TXN	thioredoxin	P10599	P10599	P10599	-0.074	0.0959	-0.15	0.00469	-0.022	0.157	Cytoplasm	enzyme	efficacy,unspecified application	PX-12
TXN2	thioredoxin 2	Q99757	Q99757		-1.058	0.000203	-0.566	0.0307			Cytoplasm	enzyme
TXNDC17	thioredoxin domain containing 17	Q9BRA2	Q9BRA2		-0.154	0.248	-0.109	0.347			Cytoplasm	enzyme
TXNL1	thioredoxin like 1	O43396	O43396	O43396	-0.157	7.57e-05	-0.185	2.39e-06	-0.061	0.00303	Cytoplasm	enzyme
TXNRD1	thioredoxin reductase 1	Q16881	Q16881	Q16881	0.132	0.108	0.14	0.0774	-0.092	0.00176	Cytoplasm	enzyme		arsenic trioxide,arsenic trioxide/cytarabine/methotrexate,arsenic trioxide/daunorubicin/tretinoin,arsenic trioxide/gemtuzumab ozogamicin/tretinoin,arsenic trioxide/idarubicin/tretinoin,arsenic trioxide/tretinoin,auranofin,ethaselen
UBA1	ubiquitin like modifier activating enzyme 1	P22314	P22314	P22314	0.002	0.21	0.015	0.343	-0.003	0.0628	Cytoplasm	enzyme		MLN7243
UBA3	ubiquitin like modifier activating enzyme 3	Q8TBC4			0.237	0.0564					Cytoplasm	enzyme
UBAC1	UBA domain containing 1	Q9BSL1	Q9BSL1	Q9BSL1	-0.309	1.69e-07	-0.151	0.000101	-0.262	4.52e-06	Nucleus	other	unspecified application
UBB	ubiquitin B			P0CG47					0.009	0.253	Cytoplasm	enzyme
UBE2D1	ubiquitin conjugating enzyme E2 D1	P51668			-0.101	0.000638					Cytoplasm	enzyme
UBE2D2	ubiquitin conjugating enzyme E2 D2		P62837	P62837			-0.105	0.00962	-0.156	0.000316	Cytoplasm	enzyme
UBE2D3	ubiquitin conjugating enzyme E2 D3		P61077	P61077			-0.105	0.00962	-0.156	0.000316	Cytoplasm	enzyme
UBE2D4	ubiquitin conjugating enzyme E2 D4 (putative)	Q9Y2X8			-0.101	0.000638					Other	enzyme	unspecified application
UBE2K	ubiquitin conjugating enzyme E2 K	P61086			-0.268	0.000664					Cytoplasm	transcription regulator
UBE2L3	ubiquitin conjugating enzyme E2 L3	P68036	P68036	P68036	-0.233	0.00355	-0.612	9.37e-09	0.012	0.223	Nucleus	enzyme
UBE2L5	ubiquitin conjugating enzyme E2 L5	A0A1B0GUS4	A0A1B0GUS4	A0A1B0GUS4	-0.086	0.00753	0.053	0.0643	0.012	0.223	Other	other
UBE2M	ubiquitin conjugating enzyme E2 M	P61081	P61081		-0.373	7.5e-08	-0.285	1.24e-05			Cytoplasm	enzyme
UBE2N	ubiquitin conjugating enzyme E2 N	P61088	P61088	P61088	-0.044	0.00392	-0.106	4.72e-06	-0.153	2.56e-10	Cytoplasm	enzyme
UBE2V1	ubiquitin conjugating enzyme E2 V1		Q13404	Q13404			-0.032	0.086	-0.098	0.0208	Nucleus	transcription regulator
UBE2V2	ubiquitin conjugating enzyme E2 V2	Q15819			-0.149	0.00833					Cytoplasm	enzyme
UCHL1	ubiquitin C-terminal hydrolase L1		P09936	P09936			-0.755	0.00546	-0.273	0.164	Cytoplasm	peptidase	diagnosis,prognosis
UCHL3	ubiquitin C-terminal hydrolase L3	P15374	P15374	P15374	-0.266	3.8e-05	-0.175	0.00728	-0.464	3.75e-09	Cytoplasm	peptidase
UFD1	ubiquitin recognition factor in ER associated degradation 1	Q92890	Q92890		-0.796	1.78e-06	-0.23	0.000583			Cytoplasm	peptidase
UGP2	UDP-glucose pyrophosphorylase 2	Q16851	Q16851	Q16851	-0.165	5.25e-05	-0.145	0.000751	-0.255	3.58e-05	Cytoplasm	enzyme
UNC45B	unc-45 myosin chaperone B	Q8IWX7	Q8IWX7	Q8IWX7	0.092	0.211	0.147	0.108	-0.042	0.244	Cytoplasm	other
UQCC2	ubiquinol-cytochrome c reductase complex assembly factor 2	Q9BRT2			0.651	0.0132					Cytoplasm	other
UQCR10	ubiquinol-cytochrome c reductase, complex III subunit X	Q9UDW1	Q9UDW1	Q9UDW1	-0.044	0.201	-0.206	1.16e-05	-0.313	2.73e-10	Cytoplasm	enzyme
UQCRB	ubiquinol-cytochrome c reductase binding protein	P14927	P14927	P14927	-0.019	0.339	-0.048	0.153	-0.195	0.00137	Cytoplasm	enzyme
UQCRC1	ubiquinol-cytochrome c reductase core protein 1	P31930	P31930	P31930	-0.05	0.184	-0.061	0.0988	-0.087	0.0581	Cytoplasm	enzyme
UQCRC2	ubiquinol-cytochrome c reductase core protein 2	P22695	P22695	P22695	0.001	0.319	0.002	0.326	-0.084	0.0165	Cytoplasm	enzyme
UQCRFS1	ubiquinol-cytochrome c reductase, Rieske iron-sulfur polypeptide 1	P47985	P47985	P47985	-0.007	0.292	-0.007	0.32	-0.064	0.054	Cytoplasm	enzyme
UQCRH	ubiquinol-cytochrome c reductase hinge protein	P07919	P07919	P07919	-0.013	0.321	-0.115	0.00172	-0.217	2.13e-06	Cytoplasm	enzyme
UQCRQ	ubiquinol-cytochrome c reductase complex III subunit VII	O14949	O14949	O14949	-0.092	0.00652	-0.108	0.00602	0.001	0.216	Cytoplasm	enzyme
USO1	USO1 vesicle transport factor	O60763	O60763	O60763	0.091	0.14	0.111	0.00789	-0.262	0.000129	Cytoplasm	other
USP5	ubiquitin specific peptidase 5	P45974	P45974	P45974	-0.005	0.0545	0.022	0.123	-0.075	0.125	Cytoplasm	peptidase
USP14	ubiquitin specific peptidase 14	P54578	P54578	P54578	0.071	0.146	-0.049	0.287	-0.202	0.000522	Cytoplasm	peptidase		VLX1570
USP15	ubiquitin specific peptidase 15	Q9Y4E8	Q9Y4E8		-0.1	0.092	-0.044	0.236			Cytoplasm	peptidase
USP9X	ubiquitin specific peptidase 9 X-linked		Q93008				-0.081	0.307			Plasma Membrane	peptidase	diagnosis
USP9Y	ubiquitin specific peptidase 9 Y-linked		O00507				-0.081	0.307			Cytoplasm	peptidase
VAMP2	vesicle associated membrane protein 2	P63027			-0.103	0.169					Plasma Membrane	other		botulinum toxin type B
VAPA	VAMP associated protein A	Q9P0L0	Q9P0L0	Q9P0L0	-0.206	0.00361	-0.062	0.0972	-0.372	7.11e-11	Plasma Membrane	other
VAPB	VAMP associated protein B and C	O95292	O95292		-0.054	0.021	-0.025	0.00996			Plasma Membrane	other
VAT1	vesicle amine transport 1	Q99536			-0.455	0.0621					Plasma Membrane	transporter
VBP1	VHL binding protein 1	P61758	P61758	P61758	-0.029	0.206	0.084	0.121	0.055	0.202	Cytoplasm	other	unspecified application
VCL	vinculin	P18206	P18206	P18206	-0.015	0.264	-0.001	0.345	0.002	0.345	Plasma Membrane	other	unspecified application
VCP	valosin containing protein	P55072	P55072	P55072	-0.054	0.0774	-0.063	0.0287	-0.116	0.00278	Cytoplasm	enzyme		CB-5083,CB-5339
VDAC1	voltage dependent anion channel 1	P21796	P21796	P21796	-0.08	0.0113	-0.073	0.0333	-0.015	0.228	Cytoplasm	ion channel
VDAC2	voltage dependent anion channel 2	P45880	P45880	P45880	-0.03	0.172	-0.009	0.264	-0.023	0.164	Cytoplasm	ion channel
VDAC3	voltage dependent anion channel 3	Q9Y277	Q9Y277	Q9Y277	-0.012	0.345	-0.019	0.265	-0.042	0.108	Cytoplasm	ion channel
VIM	vimentin	P08670	P08670	P08670	-0.466	0.0019	-0.494	0.000799	-0.094	0.201	Cytoplasm	other	diagnosis,efficacy,prognosis,unspecified application	pritumumab
VPS25	vacuolar protein sorting 25 homolog	Q9BRG1	Q9BRG1		-0.334	0.00305	0.112	0.119			Cytoplasm	other
VPS28	VPS28 subunit of ESCRT-I		Q9UK41				-0.291	0.000192			Cytoplasm	transporter
VPS29	VPS29 retromer complex component	Q9UBQ0	Q9UBQ0		-0.025	0.164	0.164	0.0538			Cytoplasm	transporter
VPS35	VPS35 retromer complex component	Q96QK1			-1.488	6.27e-06					Cytoplasm	transporter
VPS4A	vacuolar protein sorting 4 homolog A	Q9UN37	Q9UN37		-0.481	9.33e-07	0.188	0.163			Cytoplasm	enzyme
VTA1	vesicle trafficking 1	Q9NP79			-0.548	3.3e-06					Cytoplasm	other
VTN	vitronectin	P04004	P04004	P04004	0.246	0.133	0.184	0.0149	-0.262	0.000148	Extracellular Space	other	unspecified application
WARS1	tryptophanyl-tRNA synthetase 1	P23381	P23381	P23381	-0.373	4.03e-08	-0.337	3.15e-06	-0.672	4.16e-13	Cytoplasm	enzyme
WDR1	WD repeat domain 1	O75083	O75083	O75083	-0.125	0.000374	-0.16	9.12e-06	-0.073	0.0145	Extracellular Space	other
WDR77	WD repeat domain 77	Q9BQA1	Q9BQA1		0.068	0.229	0.293	0.214			Nucleus	transcription regulator
XIRP1	xin actin binding repeat containing 1	Q702N8	Q702N8	Q702N8	-0.086	0.0803	-0.116	0.0652	-0.253	0.000564	Plasma Membrane	other
XIRP2	xin actin binding repeat containing 2	A4UGR9		A4UGR9	-0.413	0.00989			-0.657	0.00161	Cytoplasm	other
XPO1	exportin 1	O14980	O14980	O14980	0.135	0.0333	-0.265	2.76e-06	-0.956	3.88e-19	Nucleus	transporter	diagnosis,efficacy	bortezomib/dexamethasone/selinexor,dexamethasone/selinexor,eltanexor,felezonexor,leptomycin B,selinexor,WJ01024
XRCC5	X-ray repair cross complementing 5	P13010	P13010	P13010	-0.135	0.0539	-0.192	0.00153	-0.065	0.026	Nucleus	enzyme	unspecified application
XRCC6	X-ray repair cross complementing 6	P12956	P12956	P12956	-0.423	5.81e-05	-0.49	2.61e-08	0.028	0.127	Nucleus	enzyme	unspecified application
YBX1	Y-box binding protein 1	P67809			-0.233	0.00277					Nucleus	transcription regulator
YBX3	Y-box binding protein 3	P16989	P16989	P16989	-0.099	0.0159	-0.17	2.92e-05	-0.152	0.000591	Nucleus	transcription regulator
YWHAB	tyrosine 3-monooxygenase/tryptophan 5-monooxygenase activation protein beta	P31946	P31946	P31946	-0.047	0.0614	-0.042	0.0586	-0.011	0.252	Cytoplasm	other
YWHAE	tyrosine 3-monooxygenase/tryptophan 5-monooxygenase activation protein epsilon	P62258	P62258	P62258	0.016	0.231	-0.021	0.343	-0.01	0.301	Cytoplasm	other	diagnosis
YWHAG	tyrosine 3-monooxygenase/tryptophan 5-monooxygenase activation protein gamma	P61981	P61981	P61981	-0.01	0.343	-0.034	0.107	-0.14	0.000998	Cytoplasm	other	unspecified application
YWHAH	tyrosine 3-monooxygenase/tryptophan 5-monooxygenase activation protein eta	Q04917	Q04917		-0.179	1.12e-05	-0.976	2.84e-07			Cytoplasm	transcription regulator	unspecified application
YWHAQ	tyrosine 3-monooxygenase/tryptophan 5-monooxygenase activation protein theta	P27348	P27348	P27348	-0.364	0.0303	-0.131	0.0727	-0.632	1.03e-08	Cytoplasm	other
YWHAZ	tyrosine 3-monooxygenase/tryptophan 5-monooxygenase activation protein zeta	P63104	P63104	P63104	-0.079	0.044	-0.009	0.27	-0.161	0.0341	Cytoplasm	enzyme	diagnosis
ZYX	zyxin	Q15942			-0.274	0.000162					Plasma Membrane	other	unspecified application

## Sheet: Table_S6_HpH_IPA_Report
© 2000-2024 QIAGEN. All rights reserved.	HpH/DDA-H
Analysis Details for My Projects->ZBM_CSI_BESD_FIN->BESD_IGT_vs_NGT_HPH_MUSCLE_2 - 2024-01-05 12:35 PM
Workspace	My Projects
Project	ZBM_CSI_BESD_FIN
Analysis	BESD_IGT_vs_NGT_HPH_MUSCLE_2 - 2024-01-05 12:35 PM
Date	Fri Jan 05 03:35:45 PST 2024
Analysis ID	41166082
Analysis Settings
Cutoff before duplicate resolution	true
Resolve duplicate on	Expression logfoldchange
Color using	Expression logfoldchange
Cutoff for Expression logfoldchange	down regulated -0.585 and up regulated 0.585
Cutoff for Expression pvalue	0.05
Reference set	Ingenuity Knowledge Base (Genes Only)
Relationship to include	Direct and Indirect
Includes Endogenous Chemicals	Yes
Optional Analyses	My Pathways My List
Filter Summary
Consider only molecules and/or relationships where
(species = Mouse OR Rat OR Human) AND
(confidence = Experimentally Observed) AND
(tissues = Skeletal Muscle) AND
(mol. types = biologic drug OR canonical pathway OR chemical - endogenous mammalian OR chemical - endogenous non-mammalian OR chemical - kinase inhibitor OR chemical - other OR chemical - protease inhibitor OR chemical drug OR chemical reagent OR chemical toxicant OR complex OR cytokine OR disease OR enzyme OR function OR fusion gene/product OR G-protein coupled receptor OR group OR growth factor…
Canonical Pathways for My Projects->ZBM_CSI_BESD_FIN->BESD_IGT_vs_NGT_HPH_MUSCLE_2 - 2024-01-05 12:35 PM
Ingenuity Canonical Pathways	-log(p-value)	zScore	Ratio	Molecules
Autophagy	0		0.00508	MAPK1
Mitochondrial Dysfunction	0		0.0034	GPX3
Molecular Mechanisms of Cancer	0		0.00513	MAPK1,MAPK14,RRAS2
RHOGDI Signaling	0		0.00541	MYL9
Sperm Motility	0		0.00508	PDIA3
Osteoarthritis Pathway	0.203		0.00568	RBP4
Clathrin-mediated Endocytosis Signaling	0.22		0.00606	RBP4
Hepatic Cholestasis	0.226		0.00621	MAPK1
Role of Osteoblasts in Rheumatoid Arthritis Signaling Pathway	0.231		0.00633	MAPK1
Class A/1 (Rhodopsin-like receptors)	0.236		0.00645	ANXA1
NF-κB Signaling	0.236		0.00645	RRAS2
Tight Junction Signaling	0.236		0.00645	MYL9
Dopamine-DARPP32 Feedback in cAMP Signaling	0.244		0.00662	PDIA3
Adrenergic Receptor Signaling Pathway (Enhanced)	0.249		0.00676	PDIA3
Epithelial Adherens Junction Signaling	0.257		0.00694	RRAS2
Cardiac β-adrenergic Signaling	0.261		0.00704	APEX1
Androgen Signaling	0.263		0.00709	MAPK1
Netrin Signaling	0.263		0.00709	MAPK1
Gαq Signaling	0.265		0.00714	MAPK1
Ion channel transport	0.273		0.00735	SRI
Xenobiotic Metabolism PXR Signaling Pathway	0.282		0.00758	HSP90B1
G alpha (i) signalling events	0.291		0.00781	ANXA1
Hereditary Breast Cancer Signaling	0.291		0.00781	RRAS2
Transcriptional regulation by RUNX1	0.296		0.00794	PSMD7
Semaphorin Neuronal Repulsive Signaling Pathway	0.298		0.008	MYL9
Type II Diabetes Mellitus Signaling	0.301		0.00806	MAPK1
Mitotic G1 phase and G1/S transition	0.306		0.0082	PSMD7
PIP3 activates AKT signaling	0.306		0.0082	MAPK1
HEY1 Signaling Pathway	0.311		0.00833	MFAP5
BBSome Signaling Pathway	0.311		0.0068	MAPK1,MAPK14
Reelin Signaling in Neurons	0.316		0.00847	MAPK1
HOTAIR Regulatory Pathway	0.324		0.0087	COL1A2
Interleukin-1 family signaling	0.327		0.00877	PSMD7
C-type lectin receptors (CLRs)	0.329		0.00885	PSMD7
Iron homeostasis signaling pathway	0.335		0.00901	MAPK1
Synthesis of DNA	0.335		0.00901	PSMD7
Pancreatic Adenocarcinoma Signaling	0.341		0.00917	MAPK1
SNARE Signaling Pathway	0.35		0.00943	MYL9
TCR signaling	0.35		0.00943	PSMD7
Role of Pattern Recognition Receptors in Recognition of Bacteria and Viruses	0.356		0.00962	MAPK1
RHOA Signaling	0.359		0.00971	MYL9
ROBO SLIT Signaling Pathway	0.359		0.00971	MYL9
Signaling by ROBO receptors	0.359		0.00971	PSMD7
Signaling by the B Cell Receptor (BCR)	0.359		0.00971	PSMD7
Myelination Signaling Pathway	0.362		0.00755	MAPK1,RRAS2
Phagosome Formation	0.368		0.00698	MAPK1,MYL9,RRAS2
Regulation of Actin-based Motility by Rho	0.375		0.0102	MYL9
Cardiac conduction	0.378		0.0103	SRI
SAPK/JNK Signaling	0.378		0.0103	RRAS2
S Phase	0.385		0.0105	PSMD7
Sirtuin Signaling Pathway	0.386		0.00791	APEX1,MAPK1
G alpha (q) signalling events	0.389		0.0106	ANXA1
Cellular response to heat stress	0.396		0.0109	MAPK1
Death Receptor Signaling	0.396		0.0109	HSPB3
Transcriptional regulation by RUNX3	0.396		0.0109	PSMD7
ABC-family proteins mediated transport	0.4		0.011	PSMD7
Gαs Signaling	0.4		0.011	MAPK1
ATM Signaling	0.403		0.0111	MAPK14
DNA Replication Pre-Initiation	0.411		0.0114	PSMD7
GPCR-Mediated Nutrient Sensing in Enteroendocrine Cells	0.419		0.0116	PDIA3
Regulation of TP53 Activity through Phosphorylation	0.419		0.0116	MAPK14
WNK Renal Signaling Pathway	0.419		0.0116	MAPK14
p53 Signaling	0.423		0.0118	MAPK14
Fcγ Receptor-mediated Phagocytosis in Macrophages and Monocytes	0.427		0.0119	MAPK1
RAB GEFs exchange GTP for GDP on RABs	0.427		0.0119	GDI1
Salvage Pathways of Pyrimidine Ribonucleotides	0.427		0.0119	MAPK1
Degradation of beta-catenin by the destruction complex	0.431		0.012	PSMD7
MAPK6/MAPK4 signaling	0.431		0.012	PSMD7
Ceramide Signaling	0.435		0.0122	RRAS2
Glycerophospholipid biosynthesis	0.435		0.0122	CPNE3
Deubiquitination	0.439		0.00873	PSMD7,UFD1
Actin Nucleation by ARP-WASP Complex	0.439		0.0123	RRAS2
Protein folding	0.439		0.0123	TUBB6
Regulation of mitotic cell cycle	0.439		0.0123	PSMD7
Unfolded protein response	0.439		0.0123	HSP90B1
Opioid Signaling Pathway	0.441		0.00877	MAPK1,RRAS2
Neddylation	0.446		0.00885	PSMD7,UFD1
Hedgehog 'on' state	0.448		0.0127	PSMD7
Cell Cycle Checkpoints	0.448		0.00889	DYNC1LI1,PSMD7
Signaling by Rho Family GTPases	0.448		0.00889	MAPK1,MYL9
EPH-Ephrin signaling	0.452		0.0128	MYL9
Signaling by NOTCH4	0.452		0.0128	PSMD7
RAF/MAP kinase cascade	0.453		0.00897	MAPK1,PSMD7
CREB Signaling in Neurons	0.455		0.00794	MAPK1,PDIA3,RRAS2
LXR/RXR Activation	0.457		0.013	RBP4
Transport of inorganic cations/anions and amino acids/oligopeptides	0.457		0.013	SRI
Opioid Signalling	0.461		0.0132	MAPK1
Fcgamma receptor (FCGR) dependent phagocytosis	0.466		0.0133	MAPK1
Sleep REM Signaling Pathway	0.471		0.0135	MAPK1
Neuroinflammation Signaling Pathway	0.471		0.00926	MAPK1,MAPK14
Breast Cancer Regulation by Stathmin1	0.475		0.00815	MAPK1,RRAS2,TUBB6
Colorectal Cancer Metastasis Signaling	0.476		0.00935	MAPK1,RRAS2
Glucose metabolism	0.48		0.0139	SLC37A4
Hypoxia Signaling in the Cardiovascular System	0.48		0.0139	HSP90B1
ERK5 Signaling	0.485		0.0141	RRAS2
FcγRIIB Signaling in B Lymphocytes	0.49		0.0143	RRAS2
Glycosaminoglycan metabolism	0.49		0.0143	PRELP
NUR77 Signaling in T Lymphocytes	0.49		0.0143	MAPK1
Systemic Lupus Erythematosus in B Cell Signaling Pathway	0.493		0.00962	MAPK1,RRAS2
Cellular response to hypoxia	0.495		0.0145	PSMD7
AMPK Signaling	0.495		0.00966	MAPK1,MAPK14
Angiopoietin Signaling	0.501		0.0147	RRAS2
Cell junction organization	0.501		0.0147	ACTN1
Factors involved in megakaryocyte development and platelet production	0.501		0.0147	EHD1
Signaling by MET	0.501		0.0147	COL1A2
Caveolar-mediated Endocytosis Signaling	0.506		0.0149	CAV1
Regulation of RUNX2 expression and activity	0.511		0.0152	PSMD7
Docosahexaenoic Acid (DHA) Signaling	0.512		0.00995	MAPK1,PDIA3
Immunoregulatory interactions between a Lymphoid and a non-Lymphoid cell	0.517		0.0154	COL1A2
Macropinocytosis Signaling	0.517		0.0154	RRAS2
TNFR2 non-canonical NF-kB pathway	0.517		0.0154	PSMD7
Pancreatic Secretion Signaling Pathway	0.521		0.0101	MAPK1,PDIA3
Cell Cycle: G1/S Checkpoint Regulation	0.528		0.0159	RPL11
Ephrin B Signaling	0.528		0.0159	MAPK1
Granzyme A Signaling	0.528		0.0159	APEX1
Macroautophagy	0.528		0.0159	CHMP4B
Phase I - Functionalization of compounds	0.528		0.0159	AOC3
Translocation of SLC2A4 (GLUT4) to the plasma membrane	0.528		0.0159	TUBB6
Xenobiotic Metabolism AHR Signaling Pathway	0.528		0.0159	HSP90B1
Airway Pathology in Chronic Obstructive Pulmonary Disease	0.534		0.0161	RBP4
Pyridoxal 5'-phosphate Salvage Pathway	0.534		0.0161	MAPK1
Signaling by FGFR2	0.534		0.0161	MAPK1
Growth Hormone Signaling	0.54		0.0164	MAPK1
Semaphorin interactions	0.546		0.0167	MYL9
Hedgehog ligand biogenesis	0.552		0.0169	PSMD7
Mitochondrial biogenesis	0.552		0.0169	MAPK14
Metabolism of polyamines	0.565		0.0175	PSMD7
NIK-->noncanonical NF-kB signaling	0.565		0.0175	PSMD7
Cilium Assembly	0.568		0.0109	DCTN1,TUBB6
Mitotic Roles of Polo-Like Kinase	0.571		0.0179	HSP90B1
Systemic Lupus Erythematosus in T Cell Signaling Pathway	0.575		0.011	MAPK1,RRAS2
Polyamine Regulation in Colon Cancer	0.578		0.0182	MAPK1
Semaphorin Signaling in Neurons	0.578		0.0182	MAPK1
Senescence-Associated Secretory Phenotype (SASP)	0.578		0.0182	MAPK1
TREM1 Signaling	0.578		0.0182	MAPK1
WNT/Ca+ pathway	0.578		0.0182	PDIA3
GPCR-Mediated Integration of Enteroendocrine Signaling Exemplified by an L Cell	0.585		0.0185	PDIA3
Peroxisomal protein import	0.585		0.0185	HSD17B4
Th17 Activation Pathway	0.585		0.0185	HSP90B1
FAT10 Signaling Pathway	0.592		0.0189	PSMD7
NCAM signaling for neurite out-growth	0.599		0.0192	MAPK1
Role of Osteoblasts, Osteoclasts and Chondrocytes in Rheumatoid Arthritis	0.599		0.0115	MAPK1,MAPK14
Ephrin Receptor Signaling	0.603		0.0116	MAPK1,RRAS2
Intrinsic Pathway for Apoptosis	0.606		0.0196	MAPK1
Calcium Signaling	0.606		0.0116	MAPK1,MYL9
Metabolism of non-coding RNA	0.614		0.02	PRMT5
Regulation of Apoptosis	0.614		0.02	PSMD7
Lymphotoxin β Receptor Signaling	0.621		0.0204	MAPK1
NLR signaling pathways	0.621		0.0204	MAPK14
Phospholipases	0.621		0.0204	PDIA3
Folate Signaling Pathway	0.629		0.0208	MAPK1
Protein Sorting Signaling Pathway	0.632		0.0121	SEC23A,VPS35
TP53 Regulates Transcription of Cell Cycle Genes	0.645		0.0217	PRMT1
Role of NFAT in Regulation of the Immune Response	0.648		0.0124	MAPK1,RRAS2
cAMP-mediated signaling	0.648		0.0124	APEX1,MAPK1
TCF dependent signaling in response to WNT	0.652		0.0125	CAV1,PSMD7
DNA Damage Bypass	0.654		0.0222	UFD1
Apoptotic execution phase	0.662		0.0227	FNTA
Transcriptional regulation by RUNX2	0.662		0.0227	MAPK1
Regulation of the Epithelial-Mesenchymal Transition Pathway	0.664		0.0127	MAPK1,RRAS2
Heme signaling	0.671		0.0233	PGRMC2
PFKFB4 Signaling Pathway	0.671		0.0233	MAPK1
Role of PI3K/AKT Signaling in the Pathogenesis of Influenza	0.68		0.0238	MAPK1
Signaling by FGFR1	0.68		0.0238	MAPK1
Systemic Lupus Erythematosus Signaling	0.685		0.0132	MAPK1,RRAS2
Acetylcholine Receptor Signaling Pathway	0.689		0.0132	MAPK1,PDIA3
Regulation of mRNA stability by proteins that bind AU-rich elements	0.69		0.0244	MAPK14
Kinesins	0.709		0.0256	TUBB6
Netrin-1 signaling	0.709		0.0256	MAPK14
Multiple Sclerosis Signaling Pathway	0.716		0.0138	MAPK1,MAPK14
Signaling by Insulin receptor	0.719		0.0263	MAPK1
Oxytocin in Brain Signaling Pathway	0.72		0.0139	MAPK1,RRAS2
Elastic fibre formation	0.73		0.027	MFAP5
Role of IL-17F in Allergic Inflammatory Airway Diseases	0.73		0.027	MAPK1
tRNA Charging	0.73		0.027	SARS1
Ribonucleotide Reductase Signaling Pathway	0.739		0.0143	MAPK1,MAPK14
MAP kinase activation	0.74		0.0278	MAPK14
Mechanisms of Viral Exit from Host Cells	0.74		0.0278	CHMP4B
Signaling by Retinoic Acid	0.74		0.0278	AKR1C3
tRNA Splicing	0.74		0.0278	APEX1
PTEN Signaling	0.748		0.0145	MAPK1,RRAS2
Signaling by FGFR4	0.751		0.0286	MAPK1
PTEN Regulation	0.758		0.0147	MAPK1,PSMD7
MIF Regulation of Innate Immunity	0.763		0.0294	MAPK1
Macrophage Alternative Activation Signaling Pathway	0.763		0.0148	MAPK1,MAPK14
RHO GTPases Activate WASPs and WAVEs	0.775		0.0303	MAPK1
Signaling by FGFR3	0.775		0.0303	MAPK1
Endocannabinoid Cancer Inhibition Pathway	0.778		0.0152	MAPK1,MAPK14
Senescence Pathway	0.78		0.0119	MAPK1,MAPK14,RRAS2
T Cell Exhaustion Signaling Pathway	0.783		0.0153	MAPK1,RRAS2
Protein Ubiquitination Pathway	0.784		0.0119	HSP90B1,HSPB3,PSMD7
Cell Cycle Regulation by BTG Family Proteins	0.787		0.0312	PRMT1
CDX Gastrointestinal Cancer Signaling Pathway	0.789		0.0154	MAPK1,MAPK14
PKCθ Signaling in T Lymphocytes	0.789		0.0154	MAPK1,RRAS2
Erythropoietin Signaling Pathway	0.794		0.0155	MAPK1,RRAS2
Phagosome Maturation	0.794		0.0155	DYNC1LI1,TUBB6
Ovarian Cancer Signaling	0.799		0.0156	MAPK1,RRAS2
Transcriptional Regulatory Network in Embryonic Stem Cells	0.799		0.0156	MAPK1,RRAS2
Antiproliferative Role of TOB in T Cell Signaling	0.799		0.0323	MAPK1
Carboxyterminal post-translational modifications of tubulin	0.799		0.0323	TUBB6
Oncogene Induced Senescence	0.799		0.0323	MAPK1
Synaptogenesis Signaling Pathway	0.809		0.0122	MAPK1,MAPK14,RRAS2
Coronavirus Replication Pathway	0.813		0.0333	TUBB6
Transcriptional Regulation by NPAS4	0.813		0.0333	MAPK1
Apelin Endothelial Signaling Pathway	0.815		0.016	MAPK1,RRAS2
Fc epsilon receptor (FCERI) signaling	0.815		0.016	MAPK1,PSMD7
Xenobiotic Metabolism CAR Signaling Pathway	0.815		0.016	HSP90B1,MAPK1
Glutaminergic Receptor Signaling Pathway (Enhanced)	0.82		0.0124	MAPK1,MAPK14,PDIA3
Huntington's Disease Signaling	0.824		0.0124	DCTN1,MAPK1,PSMD7
IL-10 Signaling	0.827		0.0163	MAPK1,MAPK14
IL-33 Signaling Pathway	0.827		0.0163	MAPK1,MAPK14
Insulin Receptor Signaling	0.827		0.0163	MAPK1,RRAS2
Relaxin Signaling	0.827		0.0163	APEX1,MAPK1
RAC Signaling	0.832		0.0164	MAPK1,RRAS2
Corticotropin Releasing Hormone Signaling	0.838		0.0165	MAPK1,MAPK14
Assembly and cell surface presentation of NMDA receptors	0.84		0.0357	TUBB6
Endosomal Sorting Complex Required For Transport (ESCRT)	0.84		0.0357	CHMP4B
Late endosomal microautophagy	0.84		0.0357	CHMP4B
MTOR signalling	0.84		0.0357	RPS6
Retinol Biosynthesis	0.84		0.0357	AKR1C3
Phospholipase C Signaling	0.843		0.0127	MAPK1,MYL9,RRAS2
Agranulocyte Adhesion and Diapedesis	0.844		0.0167	AOC3,MYL9
Antigen Presentation Pathway	0.855		0.037	PDIA3
Fatty Acid β-oxidation I	0.855		0.037	HSD17B4
MIF-mediated Glucocorticoid Regulation	0.855		0.037	MAPK1
Factors Promoting Cardiogenesis in Vertebrates	0.855		0.0169	MAPK14,PDIA3
HGF Signaling	0.855		0.0169	MAPK1,RRAS2
Asparagine N-linked glycosylation	0.87		0.0385	PDIA3
GPVI-mediated activation cascade	0.87		0.0385	COL1A2
RHO GTPases activate PKNs	0.87		0.0385	MYL9
eNOS Signaling	0.873		0.0174	CAV1,HSP90B1
Cellular Effects of Sildenafil (Viagra)	0.879		0.0175	MYL9,PDIA3
Glioma Signaling	0.879		0.0175	MAPK1,RRAS2
MSP-RON Signaling in Cancer Cells Pathway	0.879		0.0175	MAPK1,RRAS2
White Adipose Tissue Browning Pathway	0.886		0.0177	MAPK1,MAPK14
Myogenesis	0.886		0.04	MAPK14
Thrombin signalling through proteinase activated receptors (PARs)	0.886		0.04	MAPK1
Autism Signaling Pathway	0.888		0.0133	MAPK1,RPS6,RRAS2
Insulin Secretion Signaling Pathway	0.896		0.0135	MAPK1,MAPK14,PDIA3
Gap junction trafficking and regulation	0.902		0.0417	TUBB6
Metabolism of steroid hormones	0.902		0.0417	HSD17B12
Signal amplification	0.902		0.0417	MAPK14
Class I MHC mediated antigen processing and presentation	0.903	-2	0.0116	PDIA3,PSMD7,SEC22B,SEC23A
Ferroptosis Signaling Pathway	0.911		0.0183	MAPK1,RRAS2
fMLP Signaling in Neutrophils	0.911		0.0183	MAPK1,RRAS2
Circadian Rhythm Signaling	0.918		0.0138	MAPK1,PDIA3,RRAS2
NGF Signaling	0.918		0.0185	MAPK1,RRAS2
Role of Chondrocytes in Rheumatoid Arthritis Signaling Pathway	0.924		0.0187	MAPK1,MAPK14
RHO GTPases Activate Formins	0.931		0.0189	DYNC1LI1,TUBB6
Protein Kinase A Signaling	0.934		0.0119	APEX1,MAPK1,MYL9,PDIA3
S100 Family Signaling Pathway	0.936	-2.23607	0.0108	ANXA1,MAPK1,MAPK14,PDIA3,S100A13
Hedgehog 'off' state	0.938		0.019	PSMD7,TUBB6
RAF-independent MAPK1/3 activation	0.938		0.0455	MAPK1
RHO GTPases activate IQGAPs	0.938		0.0455	TUBB6
Triglyceride metabolism	0.938		0.0455	CAV1
Sphingosine-1-phosphate Signaling	0.945		0.0192	MAPK1,PDIA3
G-Protein Coupled Receptor Signaling	0.947	-1.34164	0.0108	APEX1,MAPK1,MAPK14,MYL9,RRAS2
Growth hormone receptor signaling	0.957		0.0476	MAPK1
Pyroptosis	0.957		0.0476	CHMP4B
Sulfur amino acid metabolism	0.957		0.0476	TXN2
ESR-mediated signaling	0.958		0.0196	MAPK1,PRMT1
Virus Entry via Endocytic Pathways	0.966		0.0198	CAV1,RRAS2
IL-27 Signaling Pathway	0.973		0.02	MAPK1,MAPK14
Endoplasmic Reticulum Stress Pathway	0.977		0.05	HSP90B1
RAS processing	0.977		0.05	FNTA
DHCR24 Signaling Pathway	0.98		0.0202	RBP4,RRAS2
Signaling by VEGF	0.98		0.0202	CAV1,MAPK14
Cell surface interactions at the vascular wall	0.987		0.0204	CAV1,COL1A2
IGF-1 Signaling	0.995		0.0206	MAPK1,RRAS2
p38 MAPK Signaling	0.995		0.0206	HSPB3,MAPK14
HER-2 Signaling in Breast Cancer	0.996		0.0149	MAPK1,RPS6,RRAS2
Glutathione Redox Reactions I	0.998		0.0526	GPX3
Peroxisomal lipid metabolism	0.998		0.0526	HSD17B4
Valine Degradation I	0.998		0.0526	HSD17B4
Apoptosis Signaling	1		0.0208	MAPK1,RRAS2
L1CAM interactions	1.01		0.0211	MAPK1,TUBB6
Role of NANOG in Mammalian Embryonic Stem Cell Pluripotency	1.01		0.0211	MAPK1,RRAS2
Sertoli Cell-Germ Cell Junction Signaling Pathway (Enhanced)	1.01		0.0152	MAPK1,MAPK14,RRAS2
TR/RXR Activation	1.02		0.0213	AKR1C1/AKR1C2,AKR1C3
α-Adrenergic Signaling	1.02		0.0213	MAPK1,RRAS2
RHO GTPases Activate ROCKs	1.02		0.0556	MYL9
RHO GTPases activate PAKs	1.02		0.0556	MYL9
Tryptophan Degradation III (Eukaryotic)	1.02		0.0556	HSD17B4
WNT ligand biogenesis and trafficking	1.02		0.0556	VPS35
GP6 Signaling Pathway	1.03		0.0215	COL18A1,COL1A2
Type I Diabetes Mellitus Signaling	1.03		0.0215	MAPK1,MAPK14
Sleep NREM Signaling Pathway	1.03		0.0217	MAPK1,RRAS2
Metabolism of cofactors	1.04		0.0588	COQ3
Nephrin family interactions	1.04		0.0588	ACTN1
RHO GTPases activate CIT	1.04		0.0588	MYL9
Regulation of TP53 Activity through Methylation	1.04		0.0588	PRMT5
Melanocyte Development and Pigmentation Signaling	1.05		0.0222	MAPK1,RRAS2
Interleukin-4 and Interleukin-13 signaling	1.07		0.0227	ANXA1,COL1A2
Regulation of IL-2 Expression in Activated and Anergic T Lymphocytes	1.07		0.0227	MAPK1,RRAS2
FOXO-mediated transcription of cell cycle genes	1.07		0.0625	CAV1
Isoleucine Degradation I	1.07		0.0625	HSD17B4
Lipid Antigen Presentation by CD1	1.07		0.0625	PDIA3
FAK Signaling	1.07	-2.23607	0.0118	COL18A1,COL1A2,MAPK1,MAPK14,RRAS2
Mitotic Prophase	1.07		0.023	MAPK1,NEK7
Non-Small Cell Lung Cancer Signaling	1.07		0.023	MAPK1,RRAS2
ERK/MAPK Signaling	1.08		0.0162	HSPB3,MAPK1,RRAS2
Orexin Signaling Pathway	1.08		0.0162	MAPK1,MAPK14,PDIA3
Bladder Cancer Signaling	1.08		0.0233	MAPK1,RRAS2
IL-1 Signaling	1.08		0.0233	MAPK1,MAPK14
Prolactin Signaling	1.09		0.0235	MAPK1,RRAS2
Gastrin-CREB signalling pathway via PKC and MAPK	1.1		0.0667	MAPK1
Inflammasome pathway	1.1		0.0667	NEK7
Regulation of cholesterol biosynthesis by SREBP (SREBF)	1.1		0.0667	SEC23A
Signaling by NODAL	1.1		0.0667	MAPK1
The Visual Cycle	1.1		0.0667	AKR1C3
Ubiquinol-10 Biosynthesis (Eukaryotic)	1.1		0.0667	COQ3
KEAP1-NFE2L2 pathway	1.1		0.0238	PSMD7,UFD1
CCR5 Signaling in Macrophages	1.11		0.0241	MAPK1,MAPK14
MSP-RON Signaling in Macrophages Pathway	1.11		0.0241	MAPK1,RRAS2
Acute Myeloid Leukemia Signaling	1.12		0.0244	MAPK1,RRAS2
RANK Signaling in Osteoclasts	1.12		0.0244	MAPK1,MAPK14
Activation of Matrix Metalloproteinases	1.12		0.0714	COL18A1
Signaling by Activin	1.12		0.0714	MAPK1
Role of Tissue Factor in Cancer	1.13		0.017	MAPK1,MAPK14,RRAS2
Cachexia Signaling Pathway	1.13	-2	0.014	HSP90B1,MAPK1,MAPK14,PSMD7
IL-8 Signaling	1.14		0.0172	MAPK1,MYL9,RRAS2
Mitotic G2-G2/M phases	1.14		0.0172	DCTN1,PSMD7,TUBB6
PI3K/AKT Signaling	1.14		0.0172	HSP90B1,MAPK1,RRAS2
ILK Signaling	1.15		0.0173	ACTN1,MAPK1,MYL9
RHO GTPase cycle	1.15	-2.23607	0.0125	ACTN1,CAV1,CKB,PGRMC2,RRAS2
Extracellular matrix organization	1.15		0.0253	COL18A1,COL1A2
Glutaryl-CoA Degradation	1.16		0.0769	HSD17B4
Metabolism of nitric oxide: NOS3 activation and regulation	1.16		0.0769	CAV1
Synthesis of Prostaglandins (PG) and Thromboxanes (TX)	1.16		0.0769	AKR1C3
Neuropathic Pain Signaling in Dorsal Horn Neurons	1.17		0.026	MAPK1,PDIA3
Axonal Guidance Signaling	1.17		0.0127	MAPK1,MYL9,PDIA3,RRAS2,TUBB6
Major pathway of rRNA processing in the nucleolus and cytosol	1.18		0.0179	RPL11,RPL27,RPS6
Coronavirus Pathogenesis Pathway	1.19		0.0181	MAPK1,MAPK14,RPS6
JAK/STAT Signaling	1.2		0.027	MAPK1,RRAS2
B Cell Receptor Signaling	1.2		0.0183	MAPK1,MAPK14,RRAS2
FGF Signaling	1.21		0.0274	MAPK1,MAPK14
IL-13 Signaling Pathway	1.21		0.0274	MAPK1,MAPK14
Signaling by NTRK1 (TRKA)	1.21		0.0274	MAPK1,MAPK14
GNRH Signaling	1.21		0.0184	MAPK1,MAPK14,RRAS2
IL-3 Signaling	1.22		0.0278	MAPK1,RRAS2
Trafficking and processing of endosomal TLR	1.23		0.0909	HSP90B1
Renal Cell Carcinoma Signaling	1.23		0.0282	MAPK1,RRAS2
Hepatic Fibrosis / Hepatic Stellate Cell Activation	1.23		0.0189	COL18A1,COL1A2,MYL9
Human Embryonic Stem Cell Pluripotency	1.23		0.0189	HSP90B1,MAPK1,RRAS2
CLEAR Signaling Pathway	1.24	0	0.0153	MAPK1,MAPK14,RRAS2,VPS35
Neurotrophin/TRK Signaling	1.24		0.0286	MAPK1,RRAS2
Regulation of the Epithelial Mesenchymal Transition by Growth Factors Pathway	1.24		0.019	MAPK1,MAPK14,RRAS2
Production of Nitric Oxide and Reactive Oxygen Species in Macrophages	1.25		0.0191	MAPK1,MAPK14,RBP4
Pulmonary Healing Signaling Pathway	1.25		0.0191	MAPK1,MAPK14,RRAS2
T Cell Receptor Signaling	1.25		0.0191	MAPK1,MAPK14,RRAS2
COPII-mediated vesicle transport	1.25		0.029	SEC22B,SEC23A
VEGF Family Ligand-Receptor Interactions	1.25		0.029	MAPK1,RRAS2
Oxidative Stress Induced Senescence	1.26		0.0294	MAPK1,MAPK14
Platelet homeostasis	1.26		0.0294	MAPK14,SRI
ATF6 (ATF6-alpha) activates chaperone genes	1.27		0.1	HSP90B1
Pentose Phosphate Pathway	1.27		0.1	PGD
GDNF Family Ligand-Receptor Interactions	1.27		0.0299	MAPK1,RRAS2
Integrin cell surface interactions	1.27		0.0299	COL18A1,COL1A2
Thyroid Cancer Signaling	1.27		0.0299	MAPK1,RRAS2
Role of Macrophages, Fibroblasts and Endothelial Cells in Rheumatoid Arthritis	1.27		0.0157	MAPK1,MAPK14,PDIA3,RRAS2
Activation of NMDA receptors and postsynaptic events	1.28		0.0303	MAPK1,TUBB6
NF-κB Activation by Viruses	1.28		0.0303	MAPK1,RRAS2
Toll-like Receptor Signaling	1.28		0.0303	MAPK1,MAPK14
CTLA4 Signaling in Cytotoxic T Lymphocytes	1.29		0.02	MAPK1,MAPK14,RRAS2
Agrin Interactions at Neuromuscular Junction	1.3		0.0308	MAPK1,RRAS2
Leptin Signaling in Obesity	1.3		0.0308	MAPK1,PDIA3
Serotonin Receptor Signaling	1.3	-2.23607	0.0139	CAV1,MAPK1,MAPK14,PDIA3,RRAS2
CXCR4 Signaling	1.31		0.0203	MAPK1,MYL9,RRAS2
Platelet Adhesion to exposed collagen	1.31		0.111	COL1A2
Inhibition of ARE-Mediated mRNA Degradation Pathway	1.32		0.0204	MAPK1,MAPK14,PSMD7
GM-CSF Signaling	1.32		0.0317	MAPK1,RRAS2
Melatonin Signaling	1.32		0.0317	MAPK1,PDIA3
Synaptic Long Term Depression	1.32		0.0205	MAPK1,PDIA3,RRAS2
IL-7 Signaling Pathway	1.33		0.0323	MAPK1,MAPK14
Role of MAPK Signaling in Inhibiting the Pathogenesis of Influenza	1.33		0.0323	MAPK1,MAPK14
Glioblastoma Multiforme Signaling	1.34		0.0208	MAPK1,PDIA3,RRAS2
Leukocyte Extravasation Signaling	1.34		0.0208	ACTN1,MAPK1,MAPK14
Antiproliferative Role of Somatostatin Receptor 2	1.35		0.0328	MAPK1,RRAS2
Glioma Invasiveness Signaling	1.36		0.0333	MAPK1,RRAS2
Remodeling of Epithelial Adherens Junctions	1.36		0.0333	ACTN1,TUBB6
GP1b-IX-V activation signalling	1.36		0.125	COL1A2
NFE2L2 regulates pentose phosphate pathway genes	1.36		0.125	PGD
CD40 Signaling	1.37		0.0339	MAPK1,MAPK14
ERBB4 Signaling	1.39		0.0345	MAPK1,RRAS2
Tumor Microenvironment Pathway	1.39		0.0219	COL1A2,MAPK1,RRAS2
Chronic Myeloid Leukemia Signaling	1.4	-2	0.0173	HSP90B1,MAPK1,PDIA3,RRAS2
ERB2-ERBB3 Signaling	1.41		0.0357	MAPK1,RRAS2
Androgen Biosynthesis	1.42		0.143	AKR1C3
Platelet Aggregation (Plug Formation)	1.42		0.143	COL1A2
TYSND1 cleaves peroxisomal proteins	1.42		0.143	HSD17B4
GADD45 Signaling	1.43		0.0364	MAPK1,MAPK14
Thrombopoietin Signaling	1.43		0.0364	MAPK1,RRAS2
Dilated Cardiomyopathy Signaling Pathway	1.44		0.0229	MAPK1,MAPK14,MYL9
Endometrial Cancer Signaling	1.44		0.037	MAPK1,RRAS2
Role of JAK1 and JAK3 in γc Cytokine Signaling	1.44		0.037	MAPK1,RRAS2
PI3K Signaling in B Lymphocytes	1.45		0.0231	MAPK1,PDIA3,RRAS2
Pathogen Induced Cytokine Storm Signaling Pathway	1.46	-2	0.0181	COL18A1,COL1A2,MAPK1,MAPK14
Aryl Hydrocarbon Receptor Signaling	1.47		0.0234	HSP90B1,HSPB3,MAPK1
Collagen biosynthesis and modifying enzymes	1.47		0.0385	COL18A1,COL1A2
IL-17A Signaling in Airway Cells	1.47		0.0385	MAPK1,MAPK14
HMGB1 Signaling	1.48		0.0238	MAPK1,MAPK14,RRAS2
Pentose phosphate pathway	1.48		0.167	PGD
Selenocysteine Biosynthesis II (Archaea and Eukaryotes)	1.48		0.167	SARS1
EGF Signaling	1.49		0.0392	MAPK1,MAPK14
IL-2 Signaling	1.49		0.0392	MAPK1,RRAS2
Xenobiotic Metabolism Signaling	1.49		0.0185	HSP90B1,MAPK1,MAPK14,RRAS2
CNTF Signaling	1.5		0.04	MAPK1,RRAS2
CDC42 Signaling	1.51		0.0244	MAPK1,MAPK14,MYL9
NOD1/2 Signaling Pathway	1.51		0.0244	HSP90B1,MAPK1,MAPK14
Cancer Drug Resistance by Drug Efflux	1.54		0.0417	MAPK1,RRAS2
Transcriptional activity of SMAD2/SMAD3:SMAD4 heterotrimer	1.54		0.0417	COL1A2,MAPK1
Actin Cytoskeleton Signaling	1.55	-2	0.0193	ACTN1,MAPK1,MYL9,RRAS2
STAT3 Pathway	1.56		0.0254	MAPK1,MAPK14,RRAS2
Endocannabinoid Neuronal Synapse Pathway	1.56		0.0256	MAPK1,MAPK14,PDIA3
Amyloid Processing	1.59		0.0444	MAPK1,MAPK14
Melanoma Signaling	1.59		0.0444	MAPK1,RRAS2
XBP1(S) activates chaperone genes	1.59		0.0444	DCTN1,HDGF
Endocannabinoid Developing Neuron Pathway	1.59		0.0263	MAPK1,MAPK14,RRAS2
P2Y Purigenic Receptor Signaling Pathway	1.59		0.0263	MAPK1,PDIA3,RRAS2
UVB-Induced MAPK Signaling	1.61		0.0455	MAPK1,MAPK14
Mitotic Metaphase and Anaphase	1.61	-2	0.0201	CHMP4B,DYNC1LI1,PSMD7,TUBB6
Gα12/13 Signaling	1.61		0.0268	MAPK1,MYL9,RRAS2
Synaptic Long Term Potentiation	1.61		0.0268	MAPK1,PDIA3,RRAS2
Role of IL-17A in Arthritis	1.62		0.0465	MAPK1,MAPK14
SPINK1 General Cancer Pathway	1.62		0.0465	MAPK1,RRAS2
Renin-Angiotensin Signaling	1.63		0.0273	MAPK1,MAPK14,RRAS2
Assembly of collagen fibrils and other multimeric structures	1.64		0.0476	COL18A1,COL1A2
BER (Base Excision Repair) Pathway	1.64		0.0476	APEX1,MAPK1
iNOS Signaling	1.64		0.0476	MAPK1,MAPK14
Role of PKR in Interferon Induction and Antiviral Response	1.64		0.0275	HSP90B1,MAPK1,MAPK14
Creatine-phosphate Biosynthesis	1.66		0.25	CKB
Glutathione Redox Reactions II	1.66		0.25	PDIA3
Pentose Phosphate Pathway (Oxidative Branch)	1.66		0.25	PGD
RUNX1 regulates megakaryocyte differentiation and platelet function	1.66		0.0488	MYL9,PRMT1
Xenobiotic Metabolism General Signaling Pathway	1.67		0.028	MAPK1,MAPK14,RRAS2
Response to elevated platelet cytosolic Ca2+	1.68		0.0283	ACTN1,CALU,CYRIB
Neutrophil Extracellular Trap Signaling Pathway	1.68	-0.447214	0.0175	COL18A1,COL1A2,MAPK1,MAPK14,PDIA3
Role of NFAT in Cardiac Hypertrophy	1.68	-2	0.0212	MAPK1,MAPK14,PDIA3,RRAS2
B Cell Activating Factor Signaling	1.68		0.05	MAPK1,MAPK14
G Beta Gamma Signaling	1.69		0.0286	CAV1,MAPK1,RRAS2
Nonsense-Mediated Decay (NMD)	1.69		0.0286	RPL11,RPL27,RPS6
Chaperone Mediated Autophagy Signaling Pathway	1.69	-1	0.0213	EIF4H,HSP90B1,MAPK1,MAPK14
CCR3 Signaling in Eosinophils	1.7		0.0288	MAPK1,MAPK14,RRAS2
CDK5 Signaling	1.7		0.0288	MAPK1,MAPK14,RRAS2
PAK Signaling	1.71		0.0291	MAPK1,MYL9,RRAS2
Prostate Cancer Signaling	1.71		0.0291	HSP90B1,MAPK1,RRAS2
Gαi Signaling	1.72		0.0294	CAV1,MAPK1,RRAS2
SRP-dependent cotranslational protein targeting to membrane	1.72		0.0294	RPL11,RPL27,RPS6
April Mediated Signaling	1.73		0.0526	MAPK1,MAPK14
Cholecystokinin/Gastrin-mediated Signaling	1.74		0.03	MAPK1,MAPK14,RRAS2
Resolution of Abasic Sites (AP sites)	1.75		0.0541	ADPRS,APEX1
Collagen degradation	1.77		0.0556	COL18A1,COL1A2
NRF2-mediated Oxidative Stress Response	1.77		0.0226	HSP90B1,MAPK1,MAPK14,RRAS2
Phenylethylamine Degradation I	1.78		0.333	AOC3
Oncostatin M Signaling	1.79		0.0571	MAPK1,RRAS2
Smooth Muscle Contraction	1.79		0.0571	ANXA1,MYL9
Fc Epsilon RI Signaling	1.8		0.0316	MAPK1,MAPK14,RRAS2
Wound Healing Signaling Pathway	1.81	-2	0.0231	COL18A1,COL1A2,MAPK1,RRAS2
Intra-Golgi and retrograde Golgi-to-ER traffic	1.81	-2	0.0233	DCTN1,DYNC1LI1,SEC22B,TUBB6
Telomerase Signaling	1.83		0.0323	HSP90B1,MAPK1,RRAS2
Role of MAPK Signaling in Promoting the Pathogenesis of Influenza	1.84		0.0326	MAPK1,MAPK14,RRAS2
MAPK targets/ Nuclear events mediated by MAP kinases	1.84		0.0606	MAPK1,MAPK14
Nitric Oxide Signaling in the Cardiovascular System	1.85		0.033	CAV1,HSP90B1,MAPK1
PPAR Signaling	1.85		0.033	HSP90B1,MAPK1,RRAS2
Response of EIF2AK4 (GCN2) to amino acid deficiency	1.85		0.033	RPL11,RPL27,RPS6
VEGF Signaling	1.86		0.0333	ACTN1,MAPK1,RRAS2
ID1 Signaling Pathway	1.87	0	0.0241	CAV1,MAPK1,MAPK14,RRAS2
Mitotic Prometaphase	1.87	-2	0.0241	DCTN1,DYNC1LI1,NEK7,TUBB6
4-1BB Signaling in T Lymphocytes	1.87		0.0625	MAPK1,MAPK14
Collagen chain trimerization	1.87		0.0625	COL18A1,COL1A2
Detoxification of Reactive Oxygen Species	1.87		0.0625	GPX3,TXN2
Visual phototransduction	1.87		0.0625	FNTA,RBP4
Gap Junction Signaling	1.87	-1.34164	0.0197	CAV1,MAPK1,PDIA3,RRAS2,TUBB6
COPI-mediated anterograde transport	1.88		0.0337	DCTN1,DYNC1LI1,TUBB6
Mouse Embryonic Stem Cell Pluripotency	1.88		0.0337	MAPK1,MAPK14,RRAS2
Antioxidant Action of Vitamin C	1.89		0.0341	MAPK1,MAPK14,PDIA3
Regulation of Insulin-like Growth Factor (IGF) transport and uptake by IGFBPs	1.89		0.0341	CALU,HSP90B1,PRKCSH
HIF1α Signaling	1.89	-2	0.0245	APEX1,MAPK1,RPS6,RRAS2
TGF-β Signaling	1.9		0.0345	MAPK1,MAPK14,RRAS2
Adrenomedullin signaling pathway	1.91	-2	0.0248	MAPK1,MAPK14,PDIA3,RRAS2
Estrogen Receptor Signaling	1.91	-2	0.0174	CAV1,HSP90B1,MAPK1,MYL9,PDIA3,RRAS2
Hepatic Fibrosis Signaling Pathway	1.92	-2.44949	0.0174	COL18A1,COL1A2,MAPK1,MAPK14,MYL9,RRAS2
Aggrephagy	1.92		0.0667	DYNC1LI1,TUBB6
Binding and Uptake of Ligands by Scavenger Receptors	1.92		0.0667	COL1A2,HSP90B1
Cargo concentration in the ER	1.92		0.0667	SEC22B,SEC23A
Inhibition of Angiogenesis by TSP1	1.92		0.0667	MAPK1,MAPK14
Activin Inhibin Signaling Pathway	1.93	-2	0.0252	COL18A1,COL1A2,MAPK1,MAPK14
ERBB Signaling	1.94		0.0357	MAPK1,MAPK14,RRAS2
Eukaryotic Translation Elongation	1.96		0.0361	RPL11,RPL27,RPS6
Endothelin-1 Signaling	1.97	-2	0.0258	MAPK1,MAPK14,PDIA3,RRAS2
Eukaryotic Translation Termination	1.97		0.0366	RPL11,RPL27,RPS6
Superpathway of Methionine Degradation	1.98		0.0714	PRMT1,PRMT5
Atherosclerosis Signaling	2		0.0375	COL18A1,COL1A2,RBP4
PDGF Signaling	2		0.0375	CAV1,MAPK1,RRAS2
Role of Osteoclasts in Rheumatoid Arthritis Signaling Pathway	2.02	-2.23607	0.0215	COL18A1,COL1A2,MAPK1,MAPK14,RRAS2
BAG2 Signaling Pathway	2.03		0.0385	MAPK1,MAPK14,PSMD7
BMP signaling pathway	2.03		0.0385	MAPK1,MAPK14,RRAS2
Cardiac Hypertrophy Signaling (Enhanced)	2.03	-2.64575	0.0164	APEX1,HSPB3,MAPK1,MAPK14,PDIA3,RPS6,RRAS2
Oxytocin Signaling Pathway	2.05	-2.23607	0.0217	HSPB3,MAPK1,MAPK14,MYL9,RRAS2
ABRA Signaling Pathway	2.05		0.039	ACTN1,MYL9,TAGLN
Post-translational protein phosphorylation	2.05		0.039	CALU,HSP90B1,PRKCSH
Aldosterone Signaling in Epithelial Cells	2.06		0.0274	HSP90B1,HSPB3,MAPK1,PDIA3
LPS-stimulated MAPK Signaling	2.06		0.0395	MAPK1,MAPK14,RRAS2
PEDF Signaling	2.08		0.04	MAPK1,MAPK14,RRAS2
Regulation of Cellular Mechanics by Calpain Protease	2.08		0.04	ACTN1,MAPK1,RRAS2
FLT3 Signaling in Hematopoietic Progenitor Cells	2.09		0.0405	MAPK1,MAPK14,RRAS2
Apelin Adipocyte Signaling Pathway	2.11		0.0411	GPX3,MAPK1,MAPK14
Cardiac Hypertrophy Signaling	2.12	-2.23607	0.0226	MAPK1,MAPK14,MYL9,PDIA3,RRAS2
Immunogenic Cell Death Signaling Pathway	2.13		0.0417	ANXA1,HSP90B1,PDIA3
Glucocorticoid Receptor Signaling	2.13		0.0172	ANXA1,CAV1,HSP90B1,MAPK1,MAPK14,RRAS2,SLC37A4
Acute Phase Response Signaling	2.14		0.029	MAPK1,MAPK14,RBP4,RRAS2
Retinoate Biosynthesis I	2.15		0.087	AKR1C1/AKR1C2,AKR1C3
IL-15 Signaling	2.16		0.0429	MAPK1,MAPK14,RRAS2
Apelin Liver Signaling Pathway	2.18		0.0909	COL18A1,COL1A2
Syndecan interactions	2.18		0.0909	ACTN1,COL1A2
Role of MAPK Signaling in the Pathogenesis of Influenza	2.21		0.0448	MAPK1,MAPK14,RRAS2
IL-17A Signaling in Gastric Cells	2.22		0.0952	MAPK1,MAPK14
IL-22 Signaling	2.22		0.0952	MAPK1,MAPK14
Chemokine Signaling	2.23		0.0455	MAPK1,MAPK14,RRAS2
Neutrophil degranulation	2.26	-2.64575	0.0181	CPNE3,DYNC1LI1,MAPK1,MAPK14,MLEC,PDAP1,PSMD7
Intrinsic Prothrombin Activation Pathway	2.27		0.1	COL18A1,COL1A2
Pyroptosis Signaling Pathway	2.27		0.0469	MAPK1,MAPK14,NEK7
Role of JAK family kinases in IL-6-type Cytokine Signaling	2.27		0.0469	HSP90B1,MAPK1,MAPK14
Sertoli Cell-Sertoli Cell Junction Signaling	2.31	-2.23607	0.0251	ACTN1,MAPK1,MAPK14,RRAS2,TUBB6
RHO GTPases Activate NADPH Oxidases	2.31		0.105	MAPK1,MAPK14
p70S6K Signaling	2.34	-2	0.0331	MAPK1,PDIA3,RPS6,RRAS2
Extra-nuclear estrogen signaling	2.35		0.05	CAV1,MAPK1,PRMT1
Thrombin Signaling	2.35	-2	0.0258	MAPK1,MAPK14,MYL9,PDIA3,RRAS2
Cysteine Biosynthesis III (mammalia)	2.41		0.118	PRMT1,PRMT5
Integrin Signaling	2.44	-2.23607	0.027	ACTN1,CAV1,MAPK1,MYL9,RRAS2
Methionine Degradation I (to Homocysteine)	2.46		0.125	PRMT1,PRMT5
mTOR Signaling	2.46		0.0273	EIF3B,EIF3J,MAPK1,RPS6,RRAS2
14-3-3-mediated Signaling	2.47		0.036	MAPK1,PDIA3,RRAS2,TUBB6
IL-17 Signaling	2.47	-2	0.036	HSP90B1,MAPK1,MAPK14,RRAS2
IL-6 Signaling	2.47	-2	0.036	HSPB3,MAPK1,MAPK14,RRAS2
Pulmonary Fibrosis Idiopathic Signaling Pathway	2.52	-1.63299	0.0233	CAV1,COL18A1,COL1A2,MAPK1,MAPK14,RRAS2
Neuregulin Signaling	2.56		0.0381	HSP90B1,MAPK1,RPS6,RRAS2
Methylglyoxal Degradation III	2.58		0.143	AKR1C1/AKR1C2,AKR1C3
Parkinson's Signaling	2.58		0.143	MAPK1,MAPK14
UVC-Induced MAPK Signaling	2.6		0.0612	MAPK1,MAPK14,RRAS2
PPARα/RXRα Activation	2.63	1	0.0299	HSP90B1,MAPK1,MAPK14,PDIA3,RRAS2
IL-12 Signaling and Production in Macrophages	2.64	-1.34164	0.0301	COL18A1,COL1A2,MAPK1,MAPK14,RBP4
MicroRNA Biogenesis Signaling Pathway	2.67	0.447214	0.0305	HSP90B1,MAPK1,MAPK14,PNPT1,RRAS2
RAR Activation	2.7	-1.88982	0.0218	AKR1C3,APEX1,COL1A2,MAPK1,MAPK14,PRMT1,RBP4
Paxillin Signaling	2.7	-2	0.0417	ACTN1,MAPK1,MAPK14,RRAS2
HSP90 chaperone cycle for steroid hormone receptors in the presence of ligand	2.7		0.0667	DCTN1,DYNC1LI1,TUBB6
MHC class II antigen presentation	2.74	-2	0.0426	DCTN1,DYNC1LI1,SEC23A,TUBB6
Eicosanoid Signaling	2.75	-2.44949	0.026	AKR1C3,HSPB3,MAPK1,MAPK14,PDIA3,RRAS2
Selenoamino acid metabolism	2.75	-2	0.043	RPL11,RPL27,RPS6,SARS1
UVA-Induced MAPK Signaling	2.81		0.0444	MAPK1,MAPK14,PDIA3,RRAS2
Germ Cell-Sertoli Cell Junction Signaling	2.85		0.0336	ACTN1,MAPK1,MAPK14,RRAS2,TUBB6
Natural Killer Cell Signaling	2.87	-0.447214	0.034	COL18A1,COL1A2,MAPK1,MAPK14,RRAS2
Advanced glycosylation endproduct receptor signaling	2.88		0.2	MAPK1,PRKCSH
Apelin Cardiomyocyte Signaling Pathway	2.88	-2	0.0465	MAPK1,MAPK14,MYL9,PDIA3
IL-4 Signaling	2.93	-2.23607	0.035	COL18A1,COL1A2,MAPK1,MAPK14,RRAS2
Microautophagy Signaling Pathway	3		0.0362	CHMP4B,COL18A1,COL1A2,PSMD7,SEC23A
Dendritic Cell Maturation	3.01	-2.23607	0.0365	COL18A1,COL1A2,MAPK1,MAPK14,PDIA3
Bile Acid Biosynthesis, Neutral Pathway	3.08		0.25	AKR1C1/AKR1C2,AKR1C3
Retinoid metabolism and transport	3.22		0.1	AKR1C1/AKR1C2,AKR1C3,RBP4
IL-17A Signaling in Fibroblasts	3.24	-2	0.058	COL18A1,COL1A2,MAPK1,MAPK14
Estrogen-Dependent Breast Cancer Signaling	3.26		0.0588	HSD17B12,HSD17B4,MAPK1,RRAS2
Estrogen Biosynthesis	3.36		0.111	AKR1C3,HSD17B12,HSD17B4
Bile acid and bile salt metabolism	3.41		0.115	AKR1C1/AKR1C2,AKR1C3,HSD17B4
Regulation of eIF4 and p70S6K Signaling	3.62		0.038	EIF3B,EIF3J,MAPK1,MAPK14,RPS6,RRAS2
EIF2 Signaling	4.02	-2.23607	0.0363	EIF3B,EIF3J,MAPK1,RPL11,RPL27,RPS6,RRAS2
Eukaryotic Translation Initiation	4.51	-2.44949	0.055	EIF3B,EIF3J,EIF4H,RPL11,RPL27,RPS6
Upstream Regulators for My Projects->ZBM_CSI_BESD_FIN->BESD_IGT_vs_NGT_HPH_MUSCLE_2 - 2024-01-05 12:35 PM
Analysis	ID	Upstream Regulator	Expr Log Ratio	Molecule Type	Predicted Activation State	Activation z-score	Notes	Bias Term	Bias-corrected z-score	p-value of overlap	Target molecules in dataset	Mechanistic Network
BESD_IGT_vs_NGT_HPH_MUSCLE_2 - 2024-01-05 12:35 PM		CRHR2		g-protein coupled receptor						0.0055	RBP4
BESD_IGT_vs_NGT_HPH_MUSCLE_2 - 2024-01-05 12:35 PM		ESR1		ligand-dependent nuclear receptor						0.011	CAV1
BESD_IGT_vs_NGT_HPH_MUSCLE_2 - 2024-01-05 12:35 PM		ESR2		ligand-dependent nuclear receptor						0.0218	CAV1
BESD_IGT_vs_NGT_HPH_MUSCLE_2 - 2024-01-05 12:35 PM		UCP1		transporter						0.0265	GPX3,PGD,TXN2
BESD_IGT_vs_NGT_HPH_MUSCLE_2 - 2024-01-05 12:35 PM		let-7		microrna						0.0484	COL1A2
Causal Networks for My Projects->ZBM_CSI_BESD_FIN->BESD_IGT_vs_NGT_HPH_MUSCLE_2 - 2024-01-05 12:35 PM
Master Regulator	Molecule Type	Expr Log Ratio	Depth	Predicted Activation State	Notes	Activation z-score	p-value of overlap	Network bias-corrected p-value	Participating regulators	Target molecules in dataset	Causal network	Target-connected regulators	Relationships Between Master Regulators(Increases/Downstream)	Relationships Between Master Regulators(Decreases/Downstream)	Relationships Between Master Regulators(Affects/Downstream)	Relationships Between Master Regulators(Increases/Upstream)	Relationships Between Master Regulators(Decreases/Upstream)	Relationships Between Master Regulators(Affects/Upstream)	Relationships Between Master Regulators(Increases/Both)	Relationships Between Master Regulators(Decreases/Both)	Relationships Between Master Regulators(Affects/Both)
CRHR2	G-protein coupled receptor		1		biased	-1	0.0055	0.0069	CRHR2	RBP4	1 (1)	1
ESR1	ligand-dependent nuclear receptor		1		biased	-1	0.011	0.0166	ESR1	CAV1	1 (1)	1
ESR2	ligand-dependent nuclear receptor		1		biased	-1	0.0218	0.0437	ESR2	CAV1	1 (1)	1
UCP1	transporter		1		biased	-1.732	0.026	0.0237	UCP1	GPX3,PGD,TXN2	3 (1)	1
let-7	microRNA		1		biased	1	0.0484	0.0423	let-7	COL1A2	1 (1)	1
Diseases and Bio Functions for My Projects->ZBM_CSI_BESD_FIN->BESD_IGT_vs_NGT_HPH_MUSCLE_2 - 2024-01-05 12:35 PM
Categories	Functions	Diseases or Functions Annotation	p-Value	Predicted Activation State	Activation z-score	Notes	Bias-corrected z-score	Molecules	# Molecules
Cellular Development, Embryonic Development, Organismal Development	differentiation	Differentiation of embryonic stem cells	0.00555					HSP90B1	1
Cellular Assembly and Organization	formation	Formation of cytoplasmic aggregates	0.0111					CAV1	1
Cellular Assembly and Organization	quantity	Quantity of caveolae	0.0111					CAV1	1
Cellular Movement, Hematological System Development and Function, Immune Cell Trafficking, Inflammatory Response	chemotaxis	Chemotaxis of granulocytes	0.0166					ANXA1	1
Organismal Development	lean body mass	Lean body mass	0.0166					PRMT5	1
Cellular Assembly and Organization	quantity	Quantity of lipid droplets	0.022					PRMT5	1
Cellular Movement, Hematological System Development and Function, Immune Cell Trafficking	cell movement	Cell movement of leukocytes	0.0248					AOC3,ANXA1	2
Cellular Development, Skeletal and Muscular System Development and Function, Tissue Development	cell differentiation	Cell differentiation of skeletal muscle	0.0382					UQCC2	1
Cellular Movement, Immune Cell Trafficking	emigration	Emigration of leukocytes	0.0489					ANXA1	1
Organ Development, Organ Morphology, Organismal Development, Skeletal and Muscular System Development and Function	mass	Mass of extensor digitorum longus muscle	0.0489					PRMT5	1
Tox Functions for My Projects->ZBM_CSI_BESD_FIN->BESD_IGT_vs_NGT_HPH_MUSCLE_2 - 2024-01-05 12:35 PM
Categories	Functions	Diseases or Functions Annotation	p-Value	Predicted Activation State	Activation z-score	Notes	Bias-corrected z-score	Molecules	# Molecules
Decreased Levels of Albumin	accumulation	Decreased accumulation of albumin	0.00555					CAV1	1
Regulator Effects for My Projects->ZBM_CSI_BESD_FIN->BESD_IGT_vs_NGT_HPH_MUSCLE_2 - 2024-01-05 12:35 PM
Networks for My Projects->ZBM_CSI_BESD_FIN->BESD_IGT_vs_NGT_HPH_MUSCLE_2 - 2024-01-05 12:35 PM
ID	Analysis	Molecules in Network	Score	Focus Molecules	Top Diseases and Functions
1	BESD_IGT_vs_NGT_HPH_MUSCLE_2 - 2024-01-05 12:35 PM	ANGPT1,ANKRD1,CA2,CASP8,CAV1,COL1A2,CPT1B,DYSF,EIF4EBP1,FABP4,FASN,FBP2,FMOD,FOXO1,GPX3,HSD11B1,LDLR,LIPE,MAPK1,MED1,NRIP1,PCK1,PCK2,PGD,PHKG1,PML,PPARD,PRKAA1,PRKAA2,PRMT5,RPS6,SCARB1,SREBF1,TXN2,UCP1	10	8	Lipid Metabolism, Molecular Transport, Small Molecule Biochemistry
2	BESD_IGT_vs_NGT_HPH_MUSCLE_2 - 2024-01-05 12:35 PM	ATF4,SARS1	2	1	Connective Tissue Disorders, Developmental Disorder, Hereditary Disorder
3	BESD_IGT_vs_NGT_HPH_MUSCLE_2 - 2024-01-05 12:35 PM	VPS35,ZNF106	2	1	Cell Morphology, Nervous System Development and Function, Skeletal and Muscular System Development and Function
4	BESD_IGT_vs_NGT_HPH_MUSCLE_2 - 2024-01-05 12:35 PM	CRHR2,RBP4	2	1	Dermatological Diseases and Conditions, Inflammatory Disease, Organismal Injury and Abnormalities
5	BESD_IGT_vs_NGT_HPH_MUSCLE_2 - 2024-01-05 12:35 PM	HPS6,PDIA3	2	1	Developmental Disorder, Hereditary Disorder, Metabolic Disease
My Lists for My Projects->ZBM_CSI_BESD_FIN->BESD_IGT_vs_NGT_HPH_MUSCLE_2 - 2024-01-05 12:35 PM
My Lists	-log(p-value)	Molecules
Tox Lists for My Projects->ZBM_CSI_BESD_FIN->BESD_IGT_vs_NGT_HPH_MUSCLE_2 - 2024-01-05 12:35 PM
Ingenuity Toxicity Lists	-log(p-value)	Molecules
RAR Activation	3.04	0.0219	AKR1C3,MAPK14,MAPK1,PDIA3,COL1A2,RBP4,APEX1,PRMT1
PPARα/RXRα Activation	2.63	0.0299	MAPK14,RRAS2,HSP90B1,MAPK1,PDIA3
Xenobiotic Metabolism Signaling	2.62	0.0244	AKR1C3,MAPK14,RRAS2,HSP90B1,MAPK1,AKR1C1/AKR1C2
Acute Renal Failure Panel (Rat)	2.5	0.0566	TAGLN,COL18A1,ANXA1
Aryl Hydrocarbon Receptor Signaling	2.23	0.0308	MAPK14,HSP90B1,MAPK1,HSPB3
Cardiac Hypertrophy	1.99	0.0181	CAV1,MAPK14,PRMT5,GPX3,MAPK1,MYL9
TGF-β Signaling	1.88	0.0337	MAPK14,RRAS2,MAPK1
Renal Necrosis/Cell Death	1.87	0.0141	CAV1,MAPK14,GPX3,HSP90B1,RBP4,EHD4,APEX1,PRMT1
NRF2-mediated Oxidative Stress Response	1.77	0.0226	MAPK14,RRAS2,HSP90B1,MAPK1
Oxidative Stress	1.59	0.0444	MAPK14,GPX3
Renal Ischemic Resistance Panel (Rat)	1.56	0.2	TUBB6
Increases Cardiac Proliferation	1.16	0.0256	MAPK14,MAPK1
Mechanism of Gene Regulation by Peroxisome Proliferators via PPARα	1.1	0.0238	HSD17B4,MAPK1
TR/RXR Activation	1.02	0.0213	AKR1C3,AKR1C1/AKR1C2
Liver Proliferation	0.809	0.0122	CAV1,MAPK14,MAPK1
Increases Glomerular Injury	0.685	0.0132	CAV1,MAPK14
Cardiac Necrosis/Cell Death	0.662	0.0103	MAPK14,MAPK1,TAGLN
Hepatic Cholestasis	0.644	0.0123	MAPK14,MAPK1
Liver Necrosis/Cell Death	0.596	0.00955	CAV1,MAPK14,HDGF
Cell Cycle: G1/S Checkpoint Regulation	0.528	0.0159	RPL11
Fatty Acid Metabolism	0.461	0.0132	HSD17B4
LXR/RXR Activation	0.457	0.013	RBP4
Increases Liver Damage	0.443	0.0125	MAPK14
p53 Signaling	0.419	0.0116	MAPK14
Increases Renal Damage	0.396	0.0109	MAPK14
Hepatic Fibrosis	0.372	0.00769	COL1A2,PRMT1
Decreases Transmembrane Potential of Mitochondria and Mitochondrial Membrane	0.319	0.00855	MAPK14
Cardiac Fibrosis	0.307	0.00673	CAV1,MAPK14
Mitochondrial Dysfunction	0.296	0.00658	GPX3,TXN2
Increases Liver Hyperplasia/Hyperproliferation	0.251	0.0068	MAPK1
Increases Renal Proliferation	0.236	0.00645	MAPK14
NF-κB Signaling	0.231	0.00633	RRAS2
My Pathways for My Projects->ZBM_CSI_BESD_FIN->BESD_IGT_vs_NGT_HPH_MUSCLE_2 - 2024-01-05 12:35 PM
My Pathways	-log(p-value)	Molecules
Analysis Ready Molecules for My Projects->ZBM_CSI_BESD_FIN->BESD_IGT_vs_NGT_HPH_MUSCLE_2 - 2024-01-05 12:35 PM
ID	Symbol	Expr Log Ratio	Expr p-value
P12814	ACTN1	-0.644157	1.15835e-05
Q9NX46	ADPRS	-0.637299	4.66583e-06
P52895	AKR1C1/AKR1C2	-0.672342	0.0040274
P42330	AKR1C3	-1.10476	0.00174245
P04083	ANXA1	-0.931192	0.000229448
Q16853	AOC3	-0.602925	0.00630859
P27695	APEX1	-0.737465	1.12222e-11
O43852	CALU	-0.834042	2.88046e-06
Q03135	CAV1	-1.18681	2.843e-13
Q5BKX8	CAVIN4	-0.649045	5.02864e-08
Q9H444	CHMP4B	-0.727088	2.79795e-08
P12277	CKB	-0.637183	2.2466e-07
P39060	COL18A1	-0.72456	1.2091e-07
P08123	COL1A2	-0.836646	0.00235984
Q9NZJ6	COQ3	-0.698538	8.81184e-08
O75131	CPNE3	-0.658495	2.37782e-07
P50238	CRIP1	-1.17406	3.01434e-10
Q9NUQ9	CYRIB	-0.68585	2.61877e-09
Q14203	DCTN1	-0.70263	1.74787e-12
Q9Y6G9	DYNC1LI1	-0.712532	2.14426e-08
Q9H4M9	EHD1	-1.01718	2.03637e-05
Q9H223	EHD4	-0.9291	4.69669e-10
P55884	EIF3B	-0.674501	2.73723e-05
O75822	EIF3J	-0.874382	0.000101046
Q15056	EIF4H	-0.742992	3.36069e-11
P49354	FNTA	-1.57934	2.07377e-08
P31150	GDI1	-0.616962	3.19958e-12
P22352	GPX3	-0.813341	6.73164e-09
P51858	HDGF	-0.760025	1.24325e-05
Q53GQ0	HSD17B12	-0.757571	3.22577e-05
P51659	HSD17B4	-0.861764	4.70234e-09
P14625	HSP90B1	-0.66372	1.49206e-06
Q12988	HSPB3	-0.874079	1.25117e-06
P28482	MAPK1	-1.01793	4.14838e-11
Q16539	MAPK14	-0.660917	5.94659e-10
Q13361	MFAP5	-0.888811	0.000356227
Q14165	MLEC	-0.624005	4.12488e-05
Q13203	MYBPH	-1.4033	4.85611e-06
P24844	MYL9	-0.762956	6.32026e-07
Q8TDX7	NEK7	-1.22449	0.00097198
Q9BV86	NTMT1	-0.588673	2.6622e-11
Q8WX93	PALLD	-0.774404	1.37785e-09
Q13442	PDAP1	-0.810312	1.24326e-06
P30101	PDIA3	-0.605711	1.76151e-06
P12955	PEPD	-0.871375	2.02925e-05
P52209	PGD	-0.659542	2.36031e-06
O15173	PGRMC2	-0.585863	2.68906e-06
Q9Y263	PLAA	-0.609501	2.94692e-09
Q8TCS8	PNPT1	-0.630448	0.00113582
P51888	PRELP	-1.19189	0.00449679
P14314	PRKCSH	-0.604555	9.73732e-08
Q99873	PRMT1	-1.53319	0.000184963
O14744	PRMT5	-0.620921	2.63155e-08
P51665	PSMD7	-0.61687	1.35314e-09
Q00577	PURA	-0.655909	6.2179e-06
P02753	RBP4	-2.23574	1.99421e-05
Q00765	REEP5	-0.733304	0.000457651
P62913	RPL11	-0.675304	6.69109e-11
P61353	RPL27	-0.668963	2.30768e-05
P62753	RPS6	-0.69991	2.62488e-07
P62070	RRAS2	-0.63984	4.09923e-07
Q99584	S100A13	-1.208	0.00200576
P49591	SARS1	-0.695458	5.82533e-10
O75396	SEC22B	-0.97571	1.76151e-06
Q15436	SEC23A	-1.16792	6.00078e-09
O43826	SLC37A4	-0.751374	0.00028454
Q8N5G0	SMIM20	-1.2362	2.72651e-11
P30626	SRI	-1.17504	2.52304e-09
P57105	SYNJ2BP	-0.737736	2.2457e-07
Q01995	TAGLN	-0.984889	3.66214e-08
Q9BUF5	TUBB6	-0.736189	0.00152822
Q99757	TXN2	-1.05826	0.000202611
Q92890	UFD1	-0.795627	1.77661e-06
Q9BRT2	UQCC2	0.6505	0.0132104
Q96QK1	VPS35	-1.48778	6.26796e-06

## Sheet: Table_S7_GPF_IPA_Report
© 2000-2024 QIAGEN. All rights reserved.	GPF/STW-H
Analysis Details for My Projects->ZBM_CSI_BESD_FIN->BESD_IGT_vs_NGT_GPF_MUSCLE_2 - 2024-01-05 12:28 PM
Workspace	My Projects
Project	ZBM_CSI_BESD_FIN
Analysis	BESD_IGT_vs_NGT_GPF_MUSCLE_2 - 2024-01-05 12:28 PM
Date	Fri Jan 05 03:29:20 PST 2024
Analysis ID	41166076
Analysis Settings
Cutoff before duplicate resolution	true
Resolve duplicate on	Expression logfoldchange
Color using	Expression logfoldchange
Cutoff for Expression logfoldchange	down regulated -0.585 and up regulated 0.585
Cutoff for Expression pvalue	0.05
Reference set	Ingenuity Knowledge Base (Genes Only)
Relationship to include	Direct and Indirect
Includes Endogenous Chemicals	Yes
Optional Analyses	My Pathways My List
Filter Summary
Consider only molecules and/or relationships where
(species = Mouse OR Rat OR Human) AND
(confidence = Experimentally Observed) AND
(tissues = Skeletal Muscle) AND
(mol. types = biologic drug OR canonical pathway OR chemical - endogenous mammalian OR chemical - endogenous non-mammalian OR chemical - kinase inhibitor OR chemical - other OR chemical - protease inhibitor OR chemical drug OR chemical reagent OR chemical toxicant OR complex OR cytokine OR disease OR enzyme OR function OR fusion gene/product OR G-protein coupled receptor OR group OR growth factor…
Canonical Pathways for My Projects->ZBM_CSI_BESD_FIN->BESD_IGT_vs_NGT_GPF_MUSCLE_2 - 2024-01-05 12:28 PM
Ingenuity Canonical Pathways	-log(p-value)	zScore	Ratio	Molecules
3-phosphoinositide Biosynthesis	0		0.00552	PPP1R7
CREB Signaling in Neurons	0		0.00529	MAPK1,RRAS2
Cilium Assembly	0		0.00546	TUBB6
Class I MHC mediated antigen processing and presentation	0		0.0029	UBE2L3
Huntington's Disease Signaling	0		0.00415	MAPK1
Mitotic Metaphase and Anaphase	0		0.00503	TUBB6
Osteoarthritis Pathway	0		0.00568	DCN
Superpathway of Inositol Phosphate Compounds	0		0.00485	PPP1R7
D-myo-inositol-5-phosphate Metabolism	0.197		0.00571	PPP1R7
Mitotic G2-G2/M phases	0.199		0.00575	TUBB6
NAFLD Signaling Pathway	0.199		0.00575	MAPK12
3-phosphoinositide Degradation	0.203		0.00585	PPP1R7
Clathrin-mediated Endocytosis Signaling	0.213		0.00606	ACTA2
cAMP-mediated signaling	0.219		0.00621	MAPK1
D-myo-inositol (1,4,5,6)-Tetrakisphosphate Biosynthesis	0.221		0.00625	PPP1R7
D-myo-inositol (3,4,5,6)-tetrakisphosphate Biosynthesis	0.221		0.00625	PPP1R7
Role of Osteoblasts in Rheumatoid Arthritis Signaling Pathway	0.224		0.00633	MAPK1
Class A/1 (Rhodopsin-like receptors)	0.229		0.00645	ANXA1
NF-κB Signaling	0.229		0.00645	RRAS2
Acetylcholine Receptor Signaling Pathway	0.236		0.00662	MAPK1
Dopamine-DARPP32 Feedback in cAMP Signaling	0.236		0.00662	PPP1R7
Adrenergic Receptor Signaling Pathway (Enhanced)	0.242		0.00676	ATP6V1B2
Cardiac β-adrenergic Signaling	0.253		0.00704	PPP1R7
Androgen Signaling	0.255		0.00709	MAPK1
Gαq Signaling	0.258		0.00714	MAPK1
RAR Activation	0.26		0.00623	MAPK1,MAPK12
PTEN Regulation	0.266		0.00735	MAPK1
RNA Polymerase II Transcription	0.268		0.00741	SNRPB
Endocannabinoid Cancer Inhibition Pathway	0.274		0.00758	MAPK1
G alpha (i) signalling events	0.283		0.00781	ANXA1
Adipogenesis pathway	0.295		0.00813	FABP4
Relaxin Signaling	0.295		0.00813	MAPK1
PIP3 activates AKT signaling	0.298		0.0082	MAPK1
BBSome Signaling Pathway	0.299		0.0068	MAPK1,MAPK12
Electron transport, ATP synthesis, and heat production by uncoupling proteins	0.3		0.00826	MT-ND2
FXR/RXR Activation	0.3		0.00826	MAPK12
HEY1 Signaling Pathway	0.303		0.00833	MYH11
Factors Promoting Cardiogenesis in Vertebrates	0.308		0.00847	MAPK12
RHO GTPases Activate Formins	0.341		0.00943	TUBB6
Hedgehog 'off' state	0.344		0.00952	TUBB6
Sphingosine-1-phosphate Signaling	0.347		0.00962	MAPK1
Myelination Signaling Pathway	0.349		0.00755	MAPK1,RRAS2
Oxidative Phosphorylation	0.354		0.0098	MT-ND2
Cardiac Hypertrophy Signaling (Enhanced)	0.357		0.00704	MAPK1,MAPK12,RRAS2
FAK Signaling	0.363		0.00711	MAPK1,MAPK12,RRAS2
DHCR24 Signaling Pathway	0.363		0.0101	RRAS2
Granulocyte Adhesion and Diapedesis	0.363		0.0101	MSN
Cell surface interactions at the vascular wall	0.366		0.0102	CAV1
Molecular Mechanisms of Cancer	0.367	-1	0.00684	DIABLO,MAPK1,MAPK12,RRAS2
Role of Macrophages, Fibroblasts and Endothelial Cells in Rheumatoid Arthritis	0.368		0.00784	MAPK1,RRAS2
CD28 Signaling in T Helper Cells	0.37		0.0103	MAPK12
Cardiac conduction	0.37		0.0103	TRDN
p38 MAPK Signaling	0.37		0.0103	MAPK12
G alpha (q) signalling events	0.38		0.0106	ANXA1
MHC class II antigen presentation	0.38		0.0106	TUBB6
CGAS-STING Signaling Pathway	0.384		0.0108	ATP6V1B2
Sumoylation Pathway	0.384		0.0108	MAPK12
Synaptogenesis Signaling Pathway	0.389		0.00816	MAPK1,RRAS2
Gαs Signaling	0.391		0.011	MAPK1
ATM Signaling	0.394		0.0111	MAPK12
Glutaminergic Receptor Signaling Pathway (Enhanced)	0.395		0.00826	MAPK1,MAPK12
Interleukin-4 and Interleukin-13 signaling	0.402		0.0114	ANXA1
Regulation of Insulin-like Growth Factor (IGF) transport and uptake by IGFBPs	0.402		0.0114	HSP90B1
Kinetochore Metaphase Signaling Pathway	0.406		0.0115	PPP1R7
Salvage Pathways of Pyrimidine Ribonucleotides	0.418		0.0119	MAPK1
TP53 Regulates Metabolic Genes	0.418		0.0119	YWHAH
Actin Nucleation by ARP-WASP Complex	0.43		0.0123	RRAS2
Protein folding	0.43		0.0123	TUBB6
Unfolded protein response	0.43		0.0123	HSP90B1
Extracellular matrix organization	0.439		0.0127	DCN
Transcriptional regulation of white adipocyte differentiation	0.439		0.0127	FABP4
BAG2 Signaling Pathway	0.443		0.0128	MAPK1
Signaling by NOTCH4	0.443		0.0128	ACTA2
Pathogen Induced Cytokine Storm Signaling Pathway	0.444		0.00905	MAPK1,MAPK12
Neuropathic Pain Signaling in Dorsal Horn Neurons	0.447		0.013	MAPK1
Post-translational protein phosphorylation	0.447		0.013	HSP90B1
Circadian Rhythm Signaling	0.451		0.00917	MAPK1,RRAS2
Opioid Signalling	0.452		0.0132	MAPK1
Neuroinflammation Signaling Pathway	0.456		0.00926	MAPK1,MAPK12
Fcgamma receptor (FCGR) dependent phagocytosis	0.457		0.0133	MAPK1
BEX2 Signaling Pathway	0.461		0.0135	MAPK12
Sleep REM Signaling Pathway	0.461		0.0135	MAPK1
Sphingolipid metabolism	0.476		0.0141	ALDH3A2
Systemic Lupus Erythematosus in B Cell Signaling Pathway	0.478		0.00962	MAPK1,RRAS2
AMPK Signaling	0.48		0.00966	MAPK1,MAPK12
NUR77 Signaling in T Lymphocytes	0.481		0.0143	MAPK1
Angiopoietin Signaling	0.491		0.0147	RRAS2
Regulation of the Epithelial Mesenchymal Transition in Development Pathway	0.496		0.0149	S100A4
Docosahexaenoic Acid (DHA) Signaling	0.497		0.00995	FABP4,MAPK1
HER-2 Signaling in Breast Cancer	0.497		0.00995	MAPK1,RRAS2
Pancreatic Secretion Signaling Pathway	0.506		0.0101	MAPK1,PPP1R7
Leptin Signaling in Obesity	0.507		0.0154	MAPK1
Macropinocytosis Signaling	0.507		0.0154	RRAS2
Autophagy	0.509		0.0102	MAPK1,MAPK12
Crosstalk between Dendritic Cells and Natural Killer Cells	0.519		0.0159	ACTA2
Ephrin B Signaling	0.519		0.0159	MAPK1
Granzyme A Signaling	0.519		0.0159	MT-ND2
Melatonin Signaling	0.519		0.0159	MAPK1
Signaling by FGFR2	0.524		0.0161	MAPK1
Growth Hormone Signaling	0.53		0.0164	MAPK1
Mitochondrial biogenesis	0.542		0.0169	MAPK12
Mitotic Roles of Polo-Like Kinase	0.562		0.0179	HSP90B1
Polyamine Regulation in Colon Cancer	0.568		0.0182	MAPK1
TREM1 Signaling	0.568		0.0182	MAPK1
G-Protein Coupled Receptor Signaling	0.571	-2	0.00868	MAPK1,MAPK12,MYL6,RRAS2
CD27 Signaling in Lymphocytes	0.575		0.0185	MAPK12
Sensory processing of sound by inner hair cells of the cochlea	0.575		0.0185	MSN
Th17 Activation Pathway	0.575		0.0185	HSP90B1
TNF signaling	0.582		0.0189	UBE2L3
Role of Osteoblasts, Osteoclasts and Chondrocytes in Rheumatoid Arthritis	0.583		0.0115	MAPK1,MAPK12
Ephrin Receptor Signaling	0.587		0.0116	MAPK1,RRAS2
Amino acids regulate mTORC1	0.589		0.0192	ATP6V1B2
NCAM signaling for neurite out-growth	0.589		0.0192	MAPK1
Intra-Golgi and retrograde Golgi-to-ER traffic	0.59		0.0116	PAFAH1B2,TUBB6
Iron uptake and transport	0.596		0.0196	ATP6V1B2
Activation of IRF by Cytosolic Pattern Recognition Receptors	0.604		0.02	MAPK12
Metabolism of non-coding RNA	0.604		0.02	SNRPB
NLR signaling pathways	0.611		0.0204	MAPK12
Signaling by TGF-beta Receptor Complex	0.611		0.0204	STRAP
IL-12 Signaling and Production in Macrophages	0.612		0.012	MAPK1,MAPK12
Mitotic Prometaphase	0.612		0.012	NEK7,TUBB6
Folate Signaling Pathway	0.619		0.0208	MAPK1
Transcriptional activity of SMAD2/SMAD3:SMAD4 heterotrimer	0.619		0.0208	MAPK1
HIF1α Signaling	0.623		0.0123	MAPK1,RRAS2
CSDE1 Signaling Pathway	0.627		0.0213	HNRNPD
Cell Cycle: G2/M DNA Damage Checkpoint Regulation	0.627		0.0213	YWHAH
PXR/RXR Activation	0.627		0.0213	ALDH3A2
Mitochondrial Dysfunction	0.628		0.0102	GPX3,MAPK12,MT-ND2
Hepatic Cholestasis	0.631		0.0124	MAPK1,MAPK12
Role of NFAT in Regulation of the Immune Response	0.631		0.0124	MAPK1,RRAS2
TEC Kinase Signaling	0.635		0.0125	ACTA2,MAPK12
TP53 Regulates Transcription of Cell Cycle Genes	0.635		0.0217	NPM1
Activin Inhibin Signaling Pathway	0.639		0.0126	MAPK1,MAPK12
Regulation of the Epithelial-Mesenchymal Transition Pathway	0.647		0.0127	MAPK1,RRAS2
PCP (Planar Cell Polarity) Pathway	0.652		0.0227	MAPK12
Transcriptional regulation by RUNX2	0.652		0.0227	MAPK1
Cachexia Signaling Pathway	0.654		0.0105	HSP90B1,MAPK1,MAPK12
Neutrophil Extracellular Trap Signaling Pathway	0.654		0.0105	MAPK1,MAPK12,MT-ND2
PFKFB4 Signaling Pathway	0.661		0.0233	MAPK1
BER (Base Excision Repair) Pathway	0.67		0.0238	MAPK1
Degradation of the extracellular matrix	0.67		0.0238	DCN
Role of PI3K/AKT Signaling in the Pathogenesis of Influenza	0.67		0.0238	MAPK1
Signaling by FGFR1	0.67		0.0238	MAPK1
Regulation of mRNA stability by proteins that bind AU-rich elements	0.679		0.0244	HNRNPD
SUMOylation of transcription cofactors	0.679		0.0244	NPM1
Aldosterone Signaling in Epithelial Cells	0.694		0.0137	HSP90B1,MAPK1
Synaptic Long Term Depression	0.694		0.0137	MAPK1,RRAS2
Multiple Sclerosis Signaling Pathway	0.698		0.0138	MAPK1,MAPK12
Kinesins	0.699		0.0256	TUBB6
Netrin-1 signaling	0.699		0.0256	MAPK12
OX40 Signaling Pathway	0.699		0.0256	MAPK12
Sensory processing of sound by outer hair cells of the cochlea	0.699		0.0256	MSN
Epithelial Adherens Junction Signaling	0.703		0.0139	RRAS2,YWHAH
Glioblastoma Multiforme Signaling	0.703		0.0139	MAPK1,RRAS2
Oxytocin in Brain Signaling Pathway	0.703		0.0139	MAPK1,RRAS2
Apelin Pancreas Signaling Pathway	0.709		0.0263	MAPK12
RHO GTPase cycle	0.712	-2	0.01	ALDH3A2,CAV1,CKB,RRAS2
Netrin Signaling	0.717		0.0142	DPYSL2,MAPK1
Role of IL-17F in Allergic Inflammatory Airway Diseases	0.719		0.027	MAPK1
Ribonucleotide Reductase Signaling Pathway	0.721		0.0143	MAPK1,MAPK12
MAP kinase activation	0.73		0.0278	MAPK12
MSP-RON Signaling Pathway	0.73		0.0278	ACTA2
Mechanisms of Viral Exit from Host Cells	0.73		0.0278	ACTA2
Pyrimidine Ribonucleotides De Novo Biosynthesis	0.73		0.0278	SLC25A42
nNOS Signaling in Skeletal Muscle Cells	0.73		0.0278	SNTB1
Dendritic Cell Maturation	0.736		0.0146	MAPK1,MAPK12
Tumor Microenvironment Pathway	0.736		0.0146	MAPK1,RRAS2
Ion channel transport	0.741		0.0147	ATP6V1B2,TRDN
Signaling by FGFR4	0.741		0.0286	MAPK1
Processing of Capped Intron-Containing Pre-mRNA	0.743		0.0117	HNRNPD,SNRPB,SNRPN
Macrophage Alternative Activation Signaling Pathway	0.746		0.0148	MAPK1,MAPK12
Neutrophil degranulation	0.75	-2	0.0104	MAPK1,PAFAH1B2,PDXK,SRP14
Phase II - Conjugation of compounds	0.752		0.0294	CNDP2
Senescence Pathway	0.757		0.0119	MAPK1,MAPK12,RRAS2
Sirtuin Signaling Pathway	0.757		0.0119	MAPK1,MAPK12,MT-ND2
Protein Ubiquitination Pathway	0.76		0.0119	HSP90B1,UBE2L3,UCHL1
Gene and protein expression by JAK-STAT signaling after IL-12 stimulation	0.764		0.0303	MSN
Pyrimidine Ribonucleotides Interconversion	0.764		0.0303	SLC25A42
RHO GTPases Activate WASPs and WAVEs	0.764		0.0303	MAPK1
Signaling by FGFR3	0.764		0.0303	MAPK1
CDX Gastrointestinal Cancer Signaling Pathway	0.771		0.0154	MAPK1,MAPK12
PI3K Signaling in B Lymphocytes	0.771		0.0154	MAPK1,RRAS2
PKCθ Signaling in T Lymphocytes	0.771		0.0154	MAPK1,RRAS2
Erythropoietin Signaling Pathway	0.776		0.0155	MAPK1,RRAS2
Phagosome Maturation	0.776		0.0155	ATP6V1B2,TUBB6
Detoxification of Reactive Oxygen Species	0.776		0.0312	GPX3
Hereditary Breast Cancer Signaling	0.781		0.0156	NPM1,RRAS2
Ovarian Cancer Signaling	0.781		0.0156	MAPK1,RRAS2
Transcriptional Regulatory Network in Embryonic Stem Cells	0.781		0.0156	MAPK1,RRAS2
Antiproliferative Role of TOB in T Cell Signaling	0.789		0.0323	MAPK1
Carboxyterminal post-translational modifications of tubulin	0.789		0.0323	TUBB6
Oncogene Induced Senescence	0.789		0.0323	MAPK1
Transcriptional regulation by RUNX1	0.792		0.0159	H2BC15,H2BC5
Fc epsilon receptor (FCERI) signaling	0.797		0.016	MAPK1,MAPK12
Semaphorin Neuronal Repulsive Signaling Pathway	0.797		0.016	DPYSL2,MYL6
Breast Cancer Regulation by Stathmin1	0.801	-1	0.0109	MAPK1,PPP1R7,RRAS2,TUBB6
Aggrephagy	0.802		0.0333	TUBB6
Binding and Uptake of Ligands by Scavenger Receptors	0.802		0.0333	HSP90B1
Coronavirus Replication Pathway	0.802		0.0333	TUBB6
RIPK1-mediated regulated necrosis	0.802		0.0333	UBE2L3
Transcriptional Regulation by NPAS4	0.802		0.0333	MAPK1
Type II Diabetes Mellitus Signaling	0.803		0.0161	MAPK1,MAPK12
IL-10 Signaling	0.808		0.0163	MAPK1,MAPK12
RAC Signaling	0.814		0.0164	MAPK1,RRAS2
Protein ubiquitination	0.816		0.0345	UBE2L3
Phospholipase C Signaling	0.819		0.0127	MAPK1,MYL6,RRAS2
Corticotropin Releasing Hormone Signaling	0.82		0.0165	MAPK1,MAPK12
NAD Signaling Pathway	0.82		0.0165	H2BC15,H2BC5
WNT/SHH Axonal Guidance Signaling Pathway	0.82		0.0165	MAPK12,YWHAH
Assembly and cell surface presentation of NMDA receptors	0.83		0.0357	TUBB6
Superpathway of Methionine Degradation	0.83		0.0357	PCCA
Transcriptional regulation by the AP-2 (TFAP2) family of transcription factors	0.83		0.0357	NPM1
Role of Osteoclasts in Rheumatoid Arthritis Signaling Pathway	0.831		0.0129	MAPK1,MAPK12,RRAS2
Chronic Myeloid Leukemia Signaling	0.839		0.013	HSP90B1,MAPK1,RRAS2
Eicosanoid Signaling	0.839		0.013	MAPK1,MAPK12,RRAS2
Endocannabinoid Neuronal Synapse Pathway	0.843		0.0171	MAPK1,MAPK12
MIF-mediated Glucocorticoid Regulation	0.844		0.037	MAPK1
Processing of Capped Intronless Pre-mRNA	0.844		0.037	SNRPB
Deubiquitination	0.847		0.0131	H2BC15,H2BC5,UCHL1
Opioid Signaling Pathway	0.851		0.0132	MAPK1,MAPK12,RRAS2
eNOS Signaling	0.855		0.0174	CAV1,HSP90B1
Glioma Signaling	0.861		0.0175	MAPK1,RRAS2
P2Y Purigenic Receptor Signaling Pathway	0.861		0.0175	MAPK1,RRAS2
Cell Cycle Checkpoints	0.863		0.0133	H2BC15,H2BC5,YWHAH
White Adipose Tissue Browning Pathway	0.867		0.0177	MAPK1,MAPK12
Insulin Secretion Signaling Pathway	0.871		0.0135	MAPK1,MAPK12,SRP14
RAF/MAP kinase cascade	0.871		0.0135	MAPK1,MAPK12,RASA4
Myogenesis	0.875		0.04	MAPK12
Thrombin signalling through proteinase activated receptors (PARs)	0.875		0.04	MAPK1
Iron homeostasis signaling pathway	0.88		0.018	ATP6V1B2,MAPK1
Gap junction trafficking and regulation	0.892		0.0417	TUBB6
Pancreatic Adenocarcinoma Signaling	0.892		0.0183	MAPK1,MAPK12
fMLP Signaling in Neutrophils	0.892		0.0183	MAPK1,RRAS2
S100 Family Signaling Pathway	0.9	-2.23607	0.0108	ANXA1,MAPK1,MAPK12,S100A13,S100A4
Protein Kinase A Signaling	0.903		0.0119	MAPK1,MYL6,PPP1R7,YWHAH
Role of Chondrocytes in Rheumatoid Arthritis Signaling Pathway	0.906		0.0187	MAPK1,MAPK12
Glyoxylate metabolism and glycine degradation	0.909		0.0435	GCSH
Colorectal Cancer Metastasis Signaling	0.91		0.014	MAPK1,MAPK12,RRAS2
SNARE Signaling Pathway	0.912		0.0189	MYH11,MYL6
Role of Pattern Recognition Receptors in Recognition of Bacteria and Viruses	0.926		0.0192	MAPK1,MAPK12
Apelin Liver Signaling Pathway	0.927		0.0455	MAPK12
Mitochondrial Fatty Acid Beta-Oxidation	0.927		0.0455	PCCA
RAF-independent MAPK1/3 activation	0.927		0.0455	MAPK1
RHO GTPases activate IQGAPs	0.927		0.0455	TUBB6
Role of p14/p19ARF in Tumor Suppression	0.927		0.0455	NPM1
Growth hormone receptor signaling	0.946		0.0476	MAPK1
IL-27 Signaling Pathway	0.954		0.02	MAPK1,MAPK12
Signaling by VEGF	0.961		0.0202	CAV1,MAPK12
Class I peroxisomal membrane protein import	0.966		0.05	ALDH3A2
Endoplasmic Reticulum Stress Pathway	0.966		0.05	HSP90B1
Regulation of Actin-based Motility by Rho	0.968		0.0204	ACTA2,MYL6
SAPK/JNK Signaling	0.976		0.0206	MAPK12,RRAS2
Glutathione Redox Reactions I	0.987		0.0526	GPX3
Peroxisomal lipid metabolism	0.987		0.0526	ALDH3A2
RHO GTPases Activate NADPH Oxidases	0.987		0.0526	MAPK1
Role of NANOG in Mammalian Embryonic Stem Cell Pluripotency	0.991		0.0211	MAPK1,RRAS2
α-Adrenergic Signaling	0.999		0.0213	MAPK1,RRAS2
Phagosome Formation	1.01	-2.23607	0.0116	MAPK1,MAPK12,MYH11,MYL6,RRAS2
Type I Diabetes Mellitus Signaling	1.01		0.0215	MAPK1,MAPK12
Cellular response to heat stress	1.01		0.0217	MAPK1,PTGES3
Death Receptor Signaling	1.01		0.0217	ACTA2,DIABLO
HDR through Homologous Recombination (HRR) or Single Strand Annealing (SSA)	1.01		0.0217	H2BC15,H2BC5
Role of NFAT in Cardiac Hypertrophy	1.03		0.0159	MAPK1,MAPK12,RRAS2
Melanocyte Development and Pigmentation Signaling	1.03		0.0222	MAPK1,RRAS2
COPI-mediated anterograde transport	1.04		0.0225	ANK3,TUBB6
Antioxidant Action of Vitamin C	1.05		0.0227	MAPK1,MAPK12
DNA Replication Pre-Initiation	1.05		0.0227	H2BC15,H2BC5
Orexin Signaling Pathway	1.05		0.0162	ATP6V1B2,MAPK1,MAPK12
Non-Small Cell Lung Cancer Signaling	1.06		0.023	MAPK1,RRAS2
FOXO-mediated transcription of cell cycle genes	1.06		0.0625	CAV1
mTOR Signaling	1.06		0.0164	MAPK1,RPS26,RRAS2
Bladder Cancer Signaling	1.06		0.0233	MAPK1,RRAS2
IL-1 Signaling	1.06		0.0233	MAPK1,MAPK12
Prolactin Signaling	1.07		0.0235	MAPK1,RRAS2
Systemic Lupus Erythematosus in T Cell Signaling Pathway	1.07		0.0166	MAPK1,MSN,RRAS2
Fcγ Receptor-mediated Phagocytosis in Macrophages and Monocytes	1.08		0.0238	ACTA2,MAPK1
Gastrin-CREB signalling pathway via PKC and MAPK	1.09		0.0667	MAPK1
Inflammasome pathway	1.09		0.0667	NEK7
Signaling by NODAL	1.09		0.0667	MAPK1
rRNA processing	1.09		0.0667	MT-ND2
CCR5 Signaling in Macrophages	1.09		0.0241	MAPK1,MAPK12
MSP-RON Signaling in Macrophages Pathway	1.09		0.0241	MAPK1,RRAS2
Acute Myeloid Leukemia Signaling	1.1		0.0244	MAPK1,RRAS2
Ceramide Signaling	1.1		0.0244	DIABLO,RRAS2
RANK Signaling in Osteoclasts	1.1		0.0244	MAPK1,MAPK12
Role of Tissue Factor in Cancer	1.1		0.017	MAPK1,MAPK12,RRAS2
IL-8 Signaling	1.11		0.0172	MAPK1,MAPK12,RRAS2
Signaling by Activin	1.11		0.0714	MAPK1
HIPPO signaling	1.13		0.0253	PPP1R7,YWHAH
Axonal Guidance Signaling	1.13		0.0127	DPYSL2,MAPK1,MYL6,RRAS2,TUBB6
EPH-Ephrin signaling	1.14		0.0256	MYH11,MYL6
Metabolism of nitric oxide: NOS3 activation and regulation	1.14		0.0769	CAV1
Synthesis of Prostaglandins (PG) and Thromboxanes (TX)	1.14		0.0769	PTGES3
PPARα/RXRα Activation	1.15		0.018	HSP90B1,MAPK1,RRAS2
Gene Silencing by RNA	1.17		0.0267	H2BC15,H2BC5
Regulation of Cellular Mechanics by Calpain Protease	1.17		0.0267	MAPK1,RRAS2
B Cell Receptor Signaling	1.17		0.0183	MAPK1,MAPK12,RRAS2
JAK/STAT Signaling	1.18		0.027	MAPK1,RRAS2
GNRH Signaling	1.18		0.0184	MAPK1,MAPK12,RRAS2
LPS/IL-1 Mediated Inhibition of RXR Function	1.18		0.0184	ALDH3A2,ALDH7A1,FABP4
FGF Signaling	1.19		0.0274	MAPK1,MAPK12
IL-13 Signaling Pathway	1.19		0.0274	MAPK1,MAPK12
Signaling by NTRK1 (TRKA)	1.19		0.0274	MAPK1,MAPK12
Adrenomedullin signaling pathway	1.19		0.0186	MAPK1,MAPK12,RRAS2
Hypoxia Signaling in the Cardiovascular System	1.2		0.0278	HSP90B1,UBE2L3
IL-3 Signaling	1.2		0.0278	MAPK1,RRAS2
Immunogenic Cell Death Signaling Pathway	1.2		0.0278	ANXA1,HSP90B1
TCF dependent signaling in response to WNT	1.2		0.0187	CAV1,H2BC15,H2BC5
Hepatic Fibrosis / Hepatic Stellate Cell Activation	1.21		0.0189	ACTA2,MYH11,MYL6
Human Embryonic Stem Cell Pluripotency	1.21		0.0189	HSP90B1,MAPK1,RRAS2
ERK5 Signaling	1.21		0.0282	RRAS2,YWHAH
Renal Cell Carcinoma Signaling	1.21		0.0282	MAPK1,RRAS2
Regulation of the Epithelial Mesenchymal Transition by Growth Factors Pathway	1.21		0.019	MAPK1,MAPK12,RRAS2
Phenylalanine Degradation IV (Mammalian, via Side Chain)	1.21		0.0909	ALDH3A2
Trafficking and processing of endosomal TLR	1.21		0.0909	HSP90B1
Production of Nitric Oxide and Reactive Oxygen Species in Macrophages	1.22		0.0191	MAPK1,MAPK12,PPP1R7
Pulmonary Healing Signaling Pathway	1.22		0.0191	MAPK1,MAPK12,RRAS2
T Cell Receptor Signaling	1.22		0.0191	MAPK1,MAPK12,RRAS2
FcγRIIB Signaling in B Lymphocytes	1.22		0.0286	MAPK12,RRAS2
Neurotrophin/TRK Signaling	1.22		0.0286	MAPK1,RRAS2
VEGF Family Ligand-Receptor Interactions	1.23		0.029	MAPK1,RRAS2
Endothelin-1 Signaling	1.23		0.0194	MAPK1,MAPK12,RRAS2
Tight Junction Signaling	1.23		0.0194	ACTA2,MYH11,MYL6
Dopamine Receptor Signaling	1.24		0.0294	PCBD1,PPP1R7
Estrogen-Dependent Breast Cancer Signaling	1.24		0.0294	MAPK1,RRAS2
Caveolar-mediated Endocytosis Signaling	1.25		0.0299	ACTA2,CAV1
Thyroid Cancer Signaling	1.25		0.0299	MAPK1,RRAS2
ATF6 (ATF6-alpha) activates chaperone genes	1.26		0.1	HSP90B1
Advanced glycosylation endproduct receptor signaling	1.26		0.1	MAPK1
Pentose Phosphate Pathway	1.26		0.1	H6PD
γ-glutamyl Cycle	1.26		0.1	GGCT
Serotonin Receptor Signaling	1.26	-2.23607	0.0139	CAV1,MAPK1,MAPK12,PCBD1,RRAS2
Activation of NMDA receptors and postsynaptic events	1.26		0.0303	MAPK1,TUBB6
NF-κB Activation by Viruses	1.26		0.0303	MAPK1,RRAS2
Toll-like Receptor Signaling	1.26		0.0303	MAPK1,MAPK12
CTLA4 Signaling in Cytotoxic T Lymphocytes	1.27		0.02	MAPK1,MAPK12,RRAS2
Inhibition of ARE-Mediated mRNA Degradation Pathway	1.29		0.0204	MAPK1,MAPK12,YWHAH
Natural Killer Cell Signaling	1.29		0.0204	MAPK1,MAPK12,RRAS2
Leucine Degradation I	1.3		0.111	BCAT2
Lysine catabolism	1.3		0.111	ALDH7A1
GM-CSF Signaling	1.3		0.0317	MAPK1,RRAS2
Induction of Apoptosis by HIV1	1.3		0.0317	DIABLO,MAPK12
Translocation of SLC2A4 (GLUT4) to the plasma membrane	1.3		0.0317	TUBB6,YWHAH
Activation of anterior HOX genes in hindbrain during early embryogenesis	1.31		0.0323	H2BC15,H2BC5
IL-7 Signaling Pathway	1.31		0.0323	MAPK1,MAPK12
Pyridoxal 5'-phosphate Salvage Pathway	1.31		0.0323	MAPK1,PDXK
Role of MAPK Signaling in Inhibiting the Pathogenesis of Influenza	1.31		0.0323	MAPK1,MAPK12
IL-4 Signaling	1.32		0.021	MAPK1,MAPK12,RRAS2
Antiproliferative Role of Somatostatin Receptor 2	1.33		0.0328	MAPK1,RRAS2
Hepatic Fibrosis Signaling Pathway	1.33	-2.23607	0.0145	ACTA2,MAPK1,MAPK12,MYL6,RRAS2
Extra-nuclear estrogen signaling	1.34		0.0333	CAV1,MAPK1
Glioma Invasiveness Signaling	1.34		0.0333	MAPK1,RRAS2
Remodeling of Epithelial Adherens Junctions	1.34		0.0333	ACTA2,TUBB6
Prostanoid Biosynthesis	1.35		0.125	PTGES3
CD40 Signaling	1.35		0.0339	MAPK1,MAPK12
Acute Phase Response Signaling	1.35		0.0217	MAPK1,MAPK12,RRAS2
PTEN Signaling	1.35		0.0217	MAPK1,RRAS2,YWHAH
ERBB4 Signaling	1.36		0.0345	MAPK1,RRAS2
ERB2-ERBB3 Signaling	1.39		0.0357	MAPK1,RRAS2
Phenylalanine and tyrosine metabolism	1.41		0.143	PCBD1
GADD45 Signaling	1.41		0.0364	MAPK1,MAPK12
Semaphorin Signaling in Neurons	1.41		0.0364	DPYSL2,MAPK1
Telomere Maintenance	1.41		0.0364	H2BC15,H2BC5
Thrombopoietin Signaling	1.41		0.0364	MAPK1,RRAS2
T Cell Exhaustion Signaling Pathway	1.41		0.0229	MAPK1,MAPK12,RRAS2
Endometrial Cancer Signaling	1.42		0.037	MAPK1,RRAS2
Pre-NOTCH Expression and Processing	1.42		0.037	H2BC15,H2BC5
Role of JAK1 and JAK3 in γc Cytokine Signaling	1.42		0.037	MAPK1,RRAS2
Cardiac Hypertrophy Signaling	1.43	-2	0.0181	MAPK1,MAPK12,MYL6,RRAS2
IL-17A Signaling in Airway Cells	1.45		0.0385	MAPK1,MAPK12
HMGB1 Signaling	1.45		0.0238	MAPK1,MAPK12,RRAS2
Apelin Endothelial Signaling Pathway	1.46		0.024	MAPK1,MAPK12,RRAS2
EGF Signaling	1.47		0.0392	MAPK1,MAPK12
IL-2 Signaling	1.47		0.0392	MAPK1,RRAS2
Metabolism of water-soluble vitamins and cofactors	1.47		0.0392	PCCA,PDXK
Aryl hydrocarbon receptor signalling	1.47		0.167	PTGES3
CDC42 Signaling	1.48		0.0244	MAPK1,MAPK12,MYL6
Insulin Receptor Signaling	1.48		0.0244	MAPK1,PPP1R7,RRAS2
NOD1/2 Signaling Pathway	1.48		0.0244	HSP90B1,MAPK1,MAPK12
CNTF Signaling	1.48		0.04	MAPK1,RRAS2
p70S6K Signaling	1.5		0.0248	MAPK1,RRAS2,YWHAH
Lymphotoxin β Receptor Signaling	1.5		0.0408	DIABLO,MAPK1
Amyloid fiber formation	1.51		0.0417	H2BC15,H2BC5
Cancer Drug Resistance by Drug Efflux	1.51		0.0417	MAPK1,RRAS2
HGF Signaling	1.53		0.0254	MAPK1,MAPK12,RRAS2
Reelin Signaling in Neurons	1.53		0.0254	MAPK1,MAPK12,PAFAH1B2
STAT3 Pathway	1.53		0.0254	MAPK1,MAPK12,RRAS2
DNA Double Strand Break Response	1.53		0.0426	H2BC15,H2BC5
2-oxobutanoate Degradation I	1.55		0.2	PCCA
Glycine Cleavage Complex	1.55		0.2	GCSH
Lysine Degradation II	1.55		0.2	ALDH7A1
Lysine Degradation V	1.55		0.2	ALDH7A1
Cellular Effects of Sildenafil (Viagra)	1.56		0.0263	ACTA2,MYH11,MYL6
Endocannabinoid Developing Neuron Pathway	1.56		0.0263	MAPK1,MAPK12,RRAS2
Amyloid Processing	1.57		0.0444	MAPK1,MAPK12
HSP90 chaperone cycle for steroid hormone receptors in the presence of ligand	1.57		0.0444	PTGES3,TUBB6
Melanoma Signaling	1.57		0.0444	MAPK1,RRAS2
Sertoli Cell-Germ Cell Junction Signaling Pathway (Enhanced)	1.58	-1	0.0202	ACTA2,MAPK1,MAPK12,RRAS2
Synaptic Long Term Potentiation	1.58		0.0268	MAPK1,PPP1R7,RRAS2
UVB-Induced MAPK Signaling	1.58		0.0455	MAPK1,MAPK12
IL-6 Signaling	1.59		0.027	MAPK1,MAPK12,RRAS2
Role of IL-17A in Arthritis	1.6		0.0465	MAPK1,MAPK12
SPINK1 General Cancer Pathway	1.6		0.0465	MAPK1,RRAS2
Renin-Angiotensin Signaling	1.6		0.0273	MAPK1,MAPK12,RRAS2
Thrombin Signaling	1.61		0.0206	MAPK1,MAPK12,MYL6,RRAS2
iNOS Signaling	1.62		0.0476	MAPK1,MAPK12
NGF Signaling	1.62		0.0278	MAPK1,MAPK12,RRAS2
Xenobiotic Metabolism General Signaling Pathway	1.64		0.028	MAPK1,MAPK12,RRAS2
RUNX1 regulates megakaryocyte differentiation and platelet function	1.64		0.0488	H2BC15,H2BC5
Choline catabolism	1.65		0.25	ALDH7A1
Creatine-phosphate Biosynthesis	1.65		0.25	CKB
Histidine catabolism	1.65		0.25	CARNS1
Methylmalonyl Pathway	1.65		0.25	PCCA
Pentose Phosphate Pathway (Oxidative Branch)	1.65		0.25	H6PD
G Beta Gamma Signaling	1.66		0.0286	CAV1,MAPK1,RRAS2
B Cell Activating Factor Signaling	1.66		0.05	MAPK1,MAPK12
CCR3 Signaling in Eosinophils	1.67		0.0288	MAPK1,MAPK12,RRAS2
ERK/MAPK Signaling	1.67		0.0216	MAPK1,PPP1R7,RRAS2,YWHAH
Integrin Signaling	1.67	-2	0.0216	ACTA2,CAV1,MAPK1,RRAS2
RHOGDI Signaling	1.67		0.0216	ACTA2,MSN,MYH11,MYL6
Prostate Cancer Signaling	1.68		0.0291	HSP90B1,MAPK1,RRAS2
RHOA Signaling	1.68		0.0291	ACTA2,MSN,MYL6
B-WICH complex positively regulates rRNA expression	1.68		0.0513	H2BC15,H2BC5
Gαi Signaling	1.69		0.0294	CAV1,MAPK1,RRAS2
Virus Entry via Endocytic Pathways	1.7		0.0297	ACTA2,CAV1,RRAS2
April Mediated Signaling	1.7		0.0526	MAPK1,MAPK12
Meiotic synapsis	1.7		0.0526	H2BC15,H2BC5
Signaling by Insulin receptor	1.7		0.0526	ATP6V1B2,MAPK1
Cholecystokinin/Gastrin-mediated Signaling	1.71		0.03	MAPK1,MAPK12,RRAS2
Nonhomologous End-Joining (NHEJ)	1.73		0.0541	H2BC15,H2BC5
NRF2-mediated Oxidative Stress Response	1.74		0.0226	ACTA2,HSP90B1,MAPK1,RRAS2
IGF-1 Signaling	1.75		0.0309	MAPK1,RRAS2,YWHAH
DNA Damage/Telomere Stress Induced Senescence	1.75		0.0556	H2BC15,H2BC5
Transcriptional regulation of granulopoiesis	1.75		0.0556	H2BC15,H2BC5
Apoptosis Signaling	1.76		0.0312	DIABLO,MAPK1,RRAS2
PI3K/AKT Signaling	1.76	-2	0.023	HSP90B1,MAPK1,RRAS2,YWHAH
Wound Healing Signaling Pathway	1.77	-2	0.0231	ACTA2,MAPK1,MAPK12,RRAS2
NADH Repair	1.77		0.333	NAXD
Phenylalanine Degradation I (Aerobic)	1.77		0.333	PCBD1
Phenylethylamine Degradation I	1.77		0.333	ALDH3A2
Fc Epsilon RI Signaling	1.77		0.0316	MAPK1,MAPK12,RRAS2
Oncostatin M Signaling	1.77		0.0571	MAPK1,RRAS2
CLEAR Signaling Pathway	1.77	1.34164	0.0191	ATP6V1B2,MAPK1,MAPK12,RRAS2,YWHAH
MIF Regulation of Innate Immunity	1.8		0.0588	MAPK1,MAPK12
Pulmonary Fibrosis Idiopathic Signaling Pathway	1.81	-1.34164	0.0195	ACTA2,CAV1,MAPK1,MAPK12,RRAS2
Sleep NREM Signaling Pathway	1.81		0.0326	MAPK1,RRAS2,YWHAH
Nitric Oxide Signaling in the Cardiovascular System	1.82		0.033	CAV1,HSP90B1,MAPK1
PPAR Signaling	1.82		0.033	HSP90B1,MAPK1,RRAS2
MAPK targets/ Nuclear events mediated by MAP kinases	1.82		0.0606	MAPK1,MAPK12
Coronavirus Pathogenesis Pathway	1.83	0	0.0241	MAPK1,MAPK12,NPM1,RPS26
ID1 Signaling Pathway	1.83	0	0.0241	CAV1,MAPK1,MAPK12,RRAS2
UVA-Induced MAPK Signaling	1.83		0.0333	MAPK1,MAPK12,RRAS2
VEGF Signaling	1.83		0.0333	ACTA2,MAPK1,RRAS2
Mouse Embryonic Stem Cell Pluripotency	1.85		0.0337	MAPK1,MAPK12,RRAS2
4-1BB Signaling in T Lymphocytes	1.85		0.0625	MAPK1,MAPK12
Serotonin Degradation	1.85		0.0625	ALDH3A2,ALDH7A1
Regulation of IL-2 Expression in Activated and Anergic T Lymphocytes	1.86		0.0341	MAPK1,MAPK12,RRAS2
TGF-β Signaling	1.87		0.0345	MAPK1,MAPK12,RRAS2
Apelin Cardiomyocyte Signaling Pathway	1.89		0.0349	MAPK1,MAPK12,MYL6
Regulation of eIF4 and p70S6K Signaling	1.9		0.0253	MAPK1,MAPK12,RPS26,RRAS2
Inhibition of Angiogenesis by TSP1	1.9		0.0667	MAPK1,MAPK12
Meiotic recombination	1.9		0.0667	H2BC15,H2BC5
ERBB Signaling	1.91		0.0357	MAPK1,MAPK12,RRAS2
Choline Degradation I	1.94		0.5	ALDH7A1
Tyrosine Biosynthesis IV	1.94		0.5	PCBD1
Systemic Lupus Erythematosus Signaling	1.96		0.0263	MAPK1,RRAS2,SNRPB,SNRPN
PDGF Signaling	1.97		0.0375	CAV1,MAPK1,RRAS2
CXCR4 Signaling	2	-2	0.027	MAPK1,MAPK12,MYL6,RRAS2
Oxytocin Signaling Pathway	2	-2.23607	0.0217	MAPK1,MAPK12,MYH11,MYL6,RRAS2
BMP signaling pathway	2		0.0385	MAPK1,MAPK12,RRAS2
ISGylation Signaling Pathway	2.03		0.0395	MAPK12,S100A4,UBE2L3
LPS-stimulated MAPK Signaling	2.03		0.0395	MAPK1,MAPK12,RRAS2
Autism Signaling Pathway	2.04	-2.23607	0.0222	ALDH3A2,ALDH7A1,MAPK1,PCCA,RRAS2
Signaling by Rho Family GTPases	2.04	-2.23607	0.0222	ACTA2,MAPK1,MAPK12,MSN,MYL6
PEDF Signaling	2.05		0.04	MAPK1,MAPK12,RRAS2
FLT3 Signaling in Hematopoietic Progenitor Cells	2.06		0.0405	MAPK1,MAPK12,RRAS2
Apelin Adipocyte Signaling Pathway	2.08		0.0411	GPX3,MAPK1,MAPK12
NoRC negatively regulates rRNA expression	2.09		0.0833	H2BC15,H2BC5
Oxidative Ethanol Degradation III	2.09		0.0833	ALDH3A2,ALDH7A1
ERCC6 (CSB) and EHMT2 (G9a) positively regulate rRNA expression	2.12		0.087	H2BC15,H2BC5
Noradrenaline and Adrenaline Degradation	2.12		0.087	ALDH3A2,ALDH7A1
Glycosaminoglycan metabolism	2.13		0.0429	DCN,OGN,PRELP
IL-15 Signaling	2.13		0.0429	MAPK1,MAPK12,RRAS2
IL-17A Signaling in Fibroblasts	2.15		0.0435	ACTA2,MAPK1,MAPK12
Ethanol Degradation II	2.16		0.0909	ALDH3A2,ALDH7A1
PRC2 methylates histones and DNA	2.16		0.0909	H2BC15,H2BC5
Triglyceride metabolism	2.16		0.0909	CAV1,FABP4
Xenobiotic Metabolism PXR Signaling Pathway	2.17	-1	0.0303	ALDH3A2,ALDH7A1,HSP90B1,PPP1R7
GDNF Family Ligand-Receptor Interactions	2.18		0.0448	MAPK1,MAPK12,RRAS2
Role of MAPK Signaling in the Pathogenesis of Influenza	2.18		0.0448	MAPK1,MAPK12,RRAS2
Chemokine Signaling	2.2		0.0455	MAPK1,MAPK12,RRAS2
Ethanol Degradation IV	2.2		0.0952	ALDH3A2,ALDH7A1
IL-17A Signaling in Gastric Cells	2.2		0.0952	MAPK1,MAPK12
IL-22 Signaling	2.2		0.0952	MAPK1,MAPK12
Insertion of tail-anchored proteins into the endoplasmic reticulum membrane	2.2		0.0952	ALDH3A2,GET3
Tryptophan Degradation X (Mammalian, via Tryptamine)	2.2		0.0952	ALDH3A2,ALDH7A1
Pyroptosis Signaling Pathway	2.24		0.0469	MAPK1,MAPK12,NEK7
Role of JAK family kinases in IL-6-type Cytokine Signaling	2.24		0.0469	HSP90B1,MAPK1,MAPK12
Dopamine Degradation	2.24		0.1	ALDH3A2,ALDH7A1
Xenobiotic Metabolism CAR Signaling Pathway	2.25	-1	0.032	ALDH3A2,ALDH7A1,HSP90B1,MAPK1
Sertoli Cell-Sertoli Cell Junction Signaling	2.26	-2.23607	0.0251	ACTA2,MAPK1,MAPK12,RRAS2,TUBB6
IL-33 Signaling Pathway	2.27		0.0325	H2BC15,H2BC5,MAPK1,MAPK12
Valine Degradation I	2.29		0.105	ACADSB,BCAT2
Agranulocyte Adhesion and Diapedesis	2.31		0.0333	ACTA2,MSN,MYH11,MYL6
Semaphorin interactions	2.32		0.05	DPYSL2,MYH11,MYL6
Branched-chain amino acid catabolism	2.33		0.111	ACADSB,BCAT2
Putrescine Degradation III	2.33		0.111	ALDH3A2,ALDH7A1
RHO GTPases Activate ROCKs	2.33		0.111	MYH11,MYL6
RHO GTPases activate PAKs	2.33		0.111	MYH11,MYL6
Chaperone Mediated Autophagy Signaling Pathway	2.36	-1.34164	0.0266	ATP6V1B2,HSP90B1,MAPK1,MAPK12,UCHL1
RHO GTPases activate CIT	2.38		0.118	MYH11,MYL6
MSP-RON Signaling in Cancer Cells Pathway	2.39	-2	0.0351	ACTA2,MAPK1,RRAS2,YWHAH
Gα12/13 Signaling	2.42	-2	0.0357	MAPK1,MAPK12,MYL6,RRAS2
Senescence-Associated Secretory Phenotype (SASP)	2.42		0.0545	H2BC15,H2BC5,MAPK1
IL-17 Signaling	2.43	-2	0.036	HSP90B1,MAPK1,MAPK12,RRAS2
Isoleucine Degradation I	2.44		0.125	ACADSB,BCAT2
SIRT1 negatively regulates rRNA expression	2.44		0.125	H2BC15,H2BC5
Estrogen Receptor Signaling	2.46	-2	0.0203	CAV1,HNRNPD,HSP90B1,MAPK1,MT-ND2,MYL6,RRAS2
Ferroptosis Signaling Pathway	2.46	0	0.0367	H2BC15,H2BC5,MAPK1,RRAS2
Role of PKR in Interferon Induction and Antiviral Response	2.46	0	0.0367	HSP90B1,MAPK1,MAPK12,NPM1
Gap Junction Signaling	2.49	-1.63299	0.0236	ACTA2,CAV1,MAPK1,MAPK12,RRAS2,TUBB6
Fatty Acid α-oxidation	2.49		0.133	ALDH3A2,ALDH7A1
ILK Signaling	2.51	-2.23607	0.0289	ACTA2,MAPK1,MAPK12,MYH11,MYL6
Intrinsic Pathway for Apoptosis	2.52		0.0588	DIABLO,MAPK1,YWHAH
Neuregulin Signaling	2.52		0.0381	DCN,HSP90B1,MAPK1,RRAS2
Calcium Signaling	2.53		0.0291	ACTA2,MAPK1,MYH11,MYL6,TRDN
CDK5 Signaling	2.53	1	0.0385	MAPK1,MAPK12,PPP1R7,RRAS2
PAK Signaling	2.55	-2	0.0388	MAPK1,MAPK12,MYL6,RRAS2
Activated PKN1 stimulates transcription of AR regulated genes KLK2 and KLK3	2.55		0.143	H2BC15,H2BC5
Histamine Degradation	2.55		0.143	ALDH3A2,ALDH7A1
ESR-mediated signaling	2.57	-2	0.0392	H2BC15,H2BC5,MAPK1,PTGES3
UVC-Induced MAPK Signaling	2.57		0.0612	MAPK1,MAPK12,RRAS2
Major pathway of rRNA processing in the nucleolus and cytosol	2.57	-2.23607	0.0298	RPL21,RPL24,RPL27,RPL37A,RPS26
DNA methylation	2.62		0.154	H2BC15,H2BC5
E3 ubiquitin ligases ubiquitinate target proteins	2.64		0.0652	H2BC15,H2BC5,UBE2L3
Paxillin Signaling	2.66	-2	0.0417	ACTA2,MAPK1,MAPK12,RRAS2
Telomerase Signaling	2.71		0.043	HSP90B1,MAPK1,PTGES3,RRAS2
Role of MAPK Signaling in Promoting the Pathogenesis of Influenza	2.73	-2	0.0435	ATP6V1B2,MAPK1,MAPK12,RRAS2
Germ Cell-Sertoli Cell Junction Signaling	2.8		0.0336	ACTA2,MAPK1,MAPK12,RRAS2,TUBB6
Mitotic Prophase	2.82	-2	0.046	H2BC15,H2BC5,MAPK1,NEK7
Leukocyte Extravasation Signaling	2.86	-2.23607	0.0347	ACTA2,MAPK1,MAPK12,MSN,MYL6
Actin Cytoskeleton Signaling	2.94	-2.44949	0.029	ACTA2,MAPK1,MSN,MYH11,MYL6,RRAS2
ABRA Signaling Pathway	3.02	-1	0.0519	ACTA2,MAPK12,MYH11,TAGLN
Dilated Cardiomyopathy Signaling Pathway	3.05	0	0.0382	ACTA2,MAPK1,MAPK12,MYH11,MYL6
Aryl Hydrocarbon Receptor Signaling	3.09		0.0391	ALDH3A2,ALDH7A1,HSP90B1,MAPK1,PTGES3
Nucleosome assembly	3.11		0.0938	H2BC15,H2BC5,NPM1
Oxidative Stress Induced Senescence	3.22	-2	0.0588	H2BC15,H2BC5,MAPK1,MAPK12
Agrin Interactions at Neuromuscular Junction	3.29	-2	0.0615	ACTA2,MAPK1,MAPK12,RRAS2
Glucocorticoid Receptor Signaling	3.3		0.0221	ANXA1,CAV1,HSP90B1,MAPK1,MAPK12,MT-ND2,PTGES3,RRAS2,YWHAH
Xenobiotic Metabolism AHR Signaling Pathway	3.35	0	0.0635	ALDH3A2,ALDH7A1,HSP90B1,PTGES3
14-3-3-mediated Signaling	3.37	-2	0.045	MAPK1,MAPK12,RRAS2,TUBB6,YWHAH
RHO GTPases activate PKNs	3.38		0.115	MYH11,MYL6,YWHAH
Eukaryotic Translation Initiation	3.41	-2.23607	0.0459	RPL21,RPL24,RPL27,RPL37A,RPS26
MicroRNA Biogenesis Signaling Pathway	3.47	0	0.0366	HNRNPD,HSP90B1,MAPK1,MAPK12,PTGES3,RRAS2
Nonsense-Mediated Decay (NMD)	3.49	-2.23607	0.0476	RPL21,RPL24,RPL27,RPL37A,RPS26
Xenobiotic Metabolism Signaling	3.65		0.0324	ALDH3A2,ALDH7A1,HSP90B1,MAPK1,MAPK12,PTGES3,RRAS2
L1CAM interactions	3.69	-2.23607	0.0526	ANK3,DPYSL2,MAPK1,MSN,TUBB6
Selenoamino acid metabolism	3.73	-2.23607	0.0538	RPL21,RPL24,RPL27,RPL37A,RPS26
Response of EIF2AK4 (GCN2) to amino acid deficiency	3.78	-2.23607	0.0549	RPL21,RPL24,RPL27,RPL37A,RPS26
Eukaryotic Translation Elongation	3.97	-2.23607	0.0602	RPL21,RPL24,RPL27,RPL37A,RPS26
Eukaryotic Translation Termination	3.99	-2.23607	0.061	RPL21,RPL24,RPL27,RPL37A,RPS26
Parkinson's Signaling	4.21		0.214	MAPK1,MAPK12,UCHL1
Smooth Muscle Contraction	4.35	-2	0.114	ACTA2,ANXA1,MYH11,MYL6
SRP-dependent cotranslational protein targeting to membrane	4.61	-2.44949	0.0588	RPL21,RPL24,RPL27,RPL37A,RPS26,SRP14
EIF2 Signaling	4.87	-2.44949	0.0415	ACTA2,MAPK1,RPL21,RPL24,RPL27,RPL37A,RPS26,RRAS2
Upstream Regulators for My Projects->ZBM_CSI_BESD_FIN->BESD_IGT_vs_NGT_GPF_MUSCLE_2 - 2024-01-05 12:28 PM
Analysis	ID	Upstream Regulator	Expr Log Ratio	Molecule Type	Predicted Activation State	Activation z-score	Notes	Bias Term	Bias-corrected z-score	p-value of overlap	Target molecules in dataset	Mechanistic Network
BESD_IGT_vs_NGT_GPF_MUSCLE_2 - 2024-01-05 12:28 PM		ESR1		ligand-dependent nuclear receptor						0.0113	CAV1
BESD_IGT_vs_NGT_GPF_MUSCLE_2 - 2024-01-05 12:28 PM		TRPC3		ion channel						0.0168	TRDN
BESD_IGT_vs_NGT_GPF_MUSCLE_2 - 2024-01-05 12:28 PM		ESR2		ligand-dependent nuclear receptor						0.0224	CAV1
BESD_IGT_vs_NGT_GPF_MUSCLE_2 - 2024-01-05 12:28 PM		PRMT5		enzyme						0.0224	FABP4
BESD_IGT_vs_NGT_GPF_MUSCLE_2 - 2024-01-05 12:28 PM		YAP1		transcription regulator						0.0224	ACADSB
BESD_IGT_vs_NGT_GPF_MUSCLE_2 - 2024-01-05 12:28 PM		FOXO4		transcription regulator						0.0277	CAV1,FABP4
BESD_IGT_vs_NGT_GPF_MUSCLE_2 - 2024-01-05 12:28 PM		FOXO3		transcription regulator						0.0288	CAV1,FABP4
BESD_IGT_vs_NGT_GPF_MUSCLE_2 - 2024-01-05 12:28 PM		FOXO1		transcription regulator						0.03	CAV1,FABP4
BESD_IGT_vs_NGT_GPF_MUSCLE_2 - 2024-01-05 12:28 PM		LPL		enzyme						0.0334	FABP4
BESD_IGT_vs_NGT_GPF_MUSCLE_2 - 2024-01-05 12:28 PM		NFASC		other						0.0334	ANK3
BESD_IGT_vs_NGT_GPF_MUSCLE_2 - 2024-01-05 12:28 PM		IFT88		other						0.0388	FABP4
Causal Networks for My Projects->ZBM_CSI_BESD_FIN->BESD_IGT_vs_NGT_GPF_MUSCLE_2 - 2024-01-05 12:28 PM
Master Regulator	Molecule Type	Expr Log Ratio	Depth	Predicted Activation State	Notes	Activation z-score	p-value of overlap	Network bias-corrected p-value	Participating regulators	Target molecules in dataset	Causal network	Target-connected regulators	Relationships Between Master Regulators(Increases/Downstream)	Relationships Between Master Regulators(Decreases/Downstream)	Relationships Between Master Regulators(Affects/Downstream)	Relationships Between Master Regulators(Increases/Upstream)	Relationships Between Master Regulators(Decreases/Upstream)	Relationships Between Master Regulators(Affects/Upstream)	Relationships Between Master Regulators(Increases/Both)	Relationships Between Master Regulators(Decreases/Both)	Relationships Between Master Regulators(Affects/Both)
ESR1	ligand-dependent nuclear receptor		1		biased	-1	0.0113	0.0318	ESR1	CAV1	1 (1)	1
TRPC3	ion channel		1		biased	1	0.0168	0.0152	TRPC3	TRDN	1 (1)	1
YAP1	transcription regulator		1			-1	0.0224	0.0186	YAP1	ACADSB	1 (1)	1
NFASC	other		1		biased	-1	0.0279	0.0279	NFASC	ANK3	1 (1)	1
Diseases and Bio Functions for My Projects->ZBM_CSI_BESD_FIN->BESD_IGT_vs_NGT_GPF_MUSCLE_2 - 2024-01-05 12:28 PM
Categories	Functions	Diseases or Functions Annotation	p-Value	Predicted Activation State	Activation z-score	Notes	Bias-corrected z-score	Molecules	# Molecules
Cell Morphology, Cellular Assembly and Organization	accumulation	Accumulation of synaptic vesicles	0.0057					UCHL1	1
Cellular Development, Embryonic Development, Organismal Development	differentiation	Differentiation of embryonic stem cells	0.0057					HSP90B1	1
Neurological Disease, Organismal Injury and Abnormalities	pathological denervation	Pathological denervation of motor endplates	0.0057					UCHL1	1
Cellular Assembly and Organization	formation	Formation of cytoplasmic aggregates	0.0114					CAV1	1
Cellular Assembly and Organization	quantity	Quantity of caveolae	0.0114					CAV1	1
Skeletal and Muscular System Development and Function	strength	Strength of extensor digitorum longus muscle	0.0114					TRDN	1
Organismal Development, Skeletal and Muscular System Development and Function	strength	Strength of soleus muscle	0.0114					TRDN	1
Cell-To-Cell Signaling and Interaction, Nervous System Development and Function	synaptic transmission	Synaptic transmission of intercellular junctions	0.0114					UCHL1	1
Cell Morphology, Organ Morphology, Organismal Injury and Abnormalities, Skeletal and Muscular Disorders, Skeletal and Muscular System Development and Function, Tissue Morphology	abnormal morphology	Abnormal morphology of triad junctions	0.017					TRDN	1
Cellular Movement, Hematological System Development and Function, Immune Cell Trafficking, Inflammatory Response	chemotaxis	Chemotaxis of granulocytes	0.017					ANXA1	1
Cell-To-Cell Signaling and Interaction, Nervous System Development and Function, Skeletal and Muscular System Development and Function	neurotransmission	Neurotransmission of neuromuscular junctions	0.017					UCHL1	1
Nervous System Development and Function, Tissue Morphology	quantity	Quantity of satellite cells	0.017					MAPK12	1
Carbohydrate Metabolism, Molecular Transport	quantity	Quantity of glycogen	0.0228					FABP4,H6PD	2
Embryonic Development, Organ Development, Organismal Development, Skeletal and Muscular System Development and Function, Tissue Development	formation	Formation of muscle	0.0267					MYL6,CAV1,MAPK12	3
Cell Morphology, Organ Morphology, Organismal Injury and Abnormalities, Skeletal and Muscular Disorders, Skeletal and Muscular System Development and Function, Tissue Morphology	abnormal morphology	Abnormal morphology of skeletal muscle fibers	0.0271					CAV1,H6PD	2
Cellular Development, Cellular Growth and Proliferation, Embryonic Development, Organ Development, Organismal Development, Skeletal and Muscular System Development and Function, Tissue Development	formation	Formation of myofiber	0.0282					MAPK12	1
Cell Signaling, Molecular Transport, Vitamin and Mineral Metabolism	quantity	Quantity of Ca2+	0.0282					TRDN	1
Organismal Injury and Abnormalities, Skeletal and Muscular Disorders, Skeletal and Muscular System Development and Function	abnormal morphology	Abnormal morphology of muscle	0.0388					CAV1,TRDN,H6PD	3
Cell Morphology, Organ Morphology, Skeletal and Muscular System Development and Function, Tissue Morphology	morphology	Morphology of muscle cells	0.0411					CAV1,TRDN,H6PD	3
Tox Functions for My Projects->ZBM_CSI_BESD_FIN->BESD_IGT_vs_NGT_GPF_MUSCLE_2 - 2024-01-05 12:28 PM
Categories	Functions	Diseases or Functions Annotation	p-Value	Predicted Activation State	Activation z-score	Notes	Bias-corrected z-score	Molecules	# Molecules
Decreased Levels of Albumin	accumulation	Decreased accumulation of albumin	0.0057					CAV1	1
Regulator Effects for My Projects->ZBM_CSI_BESD_FIN->BESD_IGT_vs_NGT_GPF_MUSCLE_2 - 2024-01-05 12:28 PM
Networks for My Projects->ZBM_CSI_BESD_FIN->BESD_IGT_vs_NGT_GPF_MUSCLE_2 - 2024-01-05 12:28 PM
ID	Analysis	Molecules in Network	Score	Focus Molecules	Top Diseases and Functions
1	BESD_IGT_vs_NGT_GPF_MUSCLE_2 - 2024-01-05 12:28 PM	BCAT2,CAV1,FABP4,FOXO1,FOXO3,FOXO4,GPX3,UCP1	6	4	Connective Tissue Development and Function, Embryonic Development, Organismal Development
2	BESD_IGT_vs_NGT_GPF_MUSCLE_2 - 2024-01-05 12:28 PM	ACADSB,YAP1	2	1	Energy Production, Lipid Metabolism, Small Molecule Biochemistry
3	BESD_IGT_vs_NGT_GPF_MUSCLE_2 - 2024-01-05 12:28 PM	MAPK12,MYOG	2	1	Cellular Development, Skeletal and Muscular System Development and Function, Tissue Development
4	BESD_IGT_vs_NGT_GPF_MUSCLE_2 - 2024-01-05 12:28 PM	ANK3,NFASC	2	1	Cellular Assembly and Organization, Cellular Function and Maintenance, Nervous System Development and Function
5	BESD_IGT_vs_NGT_GPF_MUSCLE_2 - 2024-01-05 12:28 PM	DCN,MYF6	2	1	Antigen Presentation, Cancer, Cell Cycle
6	BESD_IGT_vs_NGT_GPF_MUSCLE_2 - 2024-01-05 12:28 PM	ACTA2,MSTN	2	1	Cellular Development, Connective Tissue Development and Function, Skeletal and Muscular System Development and Function
7	BESD_IGT_vs_NGT_GPF_MUSCLE_2 - 2024-01-05 12:28 PM	DMD,SNTB1,UTRN	2	1	Cell Death and Survival, Embryonic Development, Organ Development
8	BESD_IGT_vs_NGT_GPF_MUSCLE_2 - 2024-01-05 12:28 PM	CPT1B,MAPK1,SGCG	2	1	Organismal Injury and Abnormalities, Skeletal and Muscular Disorders, Developmental Disorder
9	BESD_IGT_vs_NGT_GPF_MUSCLE_2 - 2024-01-05 12:28 PM	CACNA1S,CASQ1,TRDN,TRPC3	1	1	Cell Signaling, Molecular Transport, Vitamin and Mineral Metabolism
My Lists for My Projects->ZBM_CSI_BESD_FIN->BESD_IGT_vs_NGT_GPF_MUSCLE_2 - 2024-01-05 12:28 PM
My Lists	-log(p-value)	Molecules
Tox Lists for My Projects->ZBM_CSI_BESD_FIN->BESD_IGT_vs_NGT_GPF_MUSCLE_2 - 2024-01-05 12:28 PM
Ingenuity Toxicity Lists	-log(p-value)	Molecules
Xenobiotic Metabolism Signaling	3.3	0.0285	ALDH3A2,RRAS2,ALDH7A1,MAPK12,PTGES3,HSP90B1,MAPK1
Aryl Hydrocarbon Receptor Signaling	3.06	0.0385	ALDH3A2,ALDH7A1,PTGES3,HSP90B1,MAPK1
Acute Renal Failure Panel (Rat)	2.47	0.0566	TAGLN,ACTA2,ANXA1
Fatty Acid Metabolism	2.03	0.0395	ALDH3A2,ACADSB,ALDH7A1
TGF-β Signaling	1.85	0.0337	RRAS2,MAPK12,MAPK1
NRF2-mediated Oxidative Stress Response	1.74	0.0226	RRAS2,HSP90B1,MAPK1,ACTA2
Renal Ischemic Resistance Panel (Rat)	1.55	0.2	TUBB6
Genes Upregulated in Response to Proteinuria-induced Oxidative Stress in Renal Proximal Tubule Cells (Human)	1.35	0.125	MAPK12
Recovery from Ischemic Acute Renal Failure (Rat)	1.18	0.0833	S100A4
LPS/IL-1 Mediated Inhibition of RXR Function	1.15	0.018	ALDH3A2,FABP4,ALDH7A1
PPARα/RXRα Activation	1.15	0.018	RRAS2,HSP90B1,MAPK1
Liver Proliferation	0.785	0.0122	CAV1,MAPK12,MAPK1
Pro-Apoptosis	0.73	0.0278	DIABLO
Increases Liver Hyperplasia/Hyperproliferation	0.689	0.0136	MAPK12,MAPK1
Renal Necrosis/Cell Death	0.65	0.00879	CAV1,GPX3,HSP90B1,DCN,STRAP
Oxidative Stress	0.644	0.0222	GPX3
Hepatic Cholestasis	0.627	0.0123	MAPK12,MAPK1
Cell Cycle: G2/M DNA Damage Checkpoint Regulation	0.619	0.0208	YWHAH
PXR/RXR Activation	0.619	0.0208	ALDH3A2
Mitochondrial Dysfunction	0.601	0.00987	GPX3,MAPK12,MT-ND2
Cardiac Hypertrophy	0.532	0.00904	CAV1,GPX3,MAPK1
Hypoxia-Inducible Factor Signaling	0.502	0.0152	UBE2L3
Increases Cardiac Proliferation	0.443	0.0128	MAPK1
Increases Liver Damage	0.434	0.0125	MAPK12
Mechanism of Gene Regulation by Peroxisome Proliferators via PPARα	0.418	0.0119	MAPK1
Hepatic Fibrosis	0.358	0.00769	DCN,ACTA2
Increases Liver Hepatitis	0.347	0.00962	GCSH
Decreases Transmembrane Potential of Mitochondria and Mitochondrial Membrane	0.311	0.00855	DIABLO
Cardiac Necrosis/Cell Death	0.305	0.0069	MAPK1,TAGLN
Increases Liver Steatosis	0.305	0.0084	MAPK12
FXR/RXR Activation	0.3	0.00826	MAPK12
Cardiac Fibrosis	0.294	0.00673	CAV1,TRDN
Increases Glomerular Injury	0.235	0.00658	CAV1
NF-κB Signaling	0.224	0.00633	RRAS2
RAR Activation	0	0.00548	MAPK12,MAPK1
Liver Necrosis/Cell Death	0	0.00318	CAV1
My Pathways for My Projects->ZBM_CSI_BESD_FIN->BESD_IGT_vs_NGT_GPF_MUSCLE_2 - 2024-01-05 12:28 PM
My Pathways	-log(p-value)	Molecules
Analysis Ready Molecules for My Projects->ZBM_CSI_BESD_FIN->BESD_IGT_vs_NGT_GPF_MUSCLE_2 - 2024-01-05 12:28 PM
ID	Symbol	Expr Log Ratio	Expr p-value
Q9NUJ1	ABHD10	-0.78601	1.56812e-15
P45954	ACADSB	-0.654722	2.79904e-11
P62736	ACTA2	-0.871579	4.50661e-05
P51648	ALDH3A2	-0.758461	1.22187e-05
P49419	ALDH7A1	-0.591217	0.00414168
Q12955	ANK3	-0.921485	1.37031e-05
P04083	ANXA1	-0.716308	0.000746901
Q8NHH9	ATL2	-0.802657	1.43518e-06
P21281	ATP6V1B2	-1.11543	2.86692e-07
O15382	BCAT2	-0.952061	3.57614e-15
A5YM72	CARNS1	-0.72698	1.05094e-08
Q03135	CAV1	-0.713395	5.81548e-08
Q5BKX8	CAVIN4	-1.12296	2.6562e-08
P12277	CKB	-0.602107	3.82095e-07
Q96KP4	CNDP2	-0.597967	9.85261e-10
Q86VU5	COMTD1	-0.708195	0.0420432
P50238	CRIP1	-1.25612	6.15682e-08
P07585	DCN	-0.68953	0.0143548
Q9NUU7	DDX19A	-0.656928	5.0762e-05
Q9NR28	DIABLO	-0.607216	3.8935e-07
Q07507	DPT	-0.819788	0.00108122
Q16555	DPYSL2	-2.28648	0.0163892
Q68J44	DUSP29	-0.977903	7.1218e-06
P15090	FABP4	-0.644926	8.40373e-08
P23434	GCSH	-0.613187	1.98923e-06
O43681	GET3	-0.597646	1.48189e-07
O75223	GGCT	-0.648431	3.8173e-09
P22352	GPX3	-0.587298	1.42412e-06
Q99877	H2BC15	-0.646411	2.28635e-09
P58876	H2BC5	-0.646411	2.28635e-09
O95479	H6PD	-0.7267	3.25291e-06
Q7Z4H3	HDDC2	-0.619497	2.25766e-09
Q14103	HNRNPD	-0.862294	4.30877e-08
P14625	HSP90B1	-0.608953	3.07811e-05
Q6P5Q4	LMOD2	-0.622282	7.10348e-06
P28482	MAPK1	-1.27339	1.67859e-10
P53778	MAPK12	-0.621338	2.64817e-07
P26038	MSN	-0.664673	1.78412e-06
P03891	MT-ND2	-0.640604	1.37031e-05
Q13203	MYBPH	-2.24332	1.85154e-08
P35749	MYH11	-0.732633	1.21041e-06
P60660	MYL6	-0.664134	1.49787e-06
Q8IW45	NAXD	-0.656319	2.78935e-10
Q8TDX7	NEK7	-0.60333	9.26207e-05
P06748	NPM1	-0.669965	4.71758e-05
P20774	OGN	-0.767387	0.0255452
P68402	PAFAH1B2	-0.594617	2.38719e-06
P61457	PCBD1	-0.916822	1.14913e-07
P05165	PCCA	-0.678474	1.08946e-06
O00764	PDXK	-0.626372	3.02586e-10
Q15435	PPP1R7	-0.688853	9.89589e-06
P51888	PRELP	-0.905487	0.0294475
Q15185	PTGES3	-0.887439	0.000136717
O43374	RASA4	-1.27936	1.80255e-05
Q96K19	RNF170	-0.651419	4.21882e-08
P46778	RPL21	-0.794169	0.000222666
P83731	RPL24	-0.635896	1.34999e-06
P61353	RPL27	-0.616194	5.18429e-07
P61513	RPL37A	-0.707077	4.27071e-08
P62854	RPS26	-0.622265	4.75319e-05
P62070	RRAS2	-1.00742	5.3453e-11
Q99584	S100A13	-1.32591	0.00158737
P26447	S100A4	-0.685455	2.63804e-05
Q86VD7	SLC25A42	-1.25354	5.23227e-10
Q14BN4	SLMAP	-0.630273	2.14164e-05
P14678	SNRPB	-0.907606	3.04165e-12
P63162	SNRPN	-0.907606	3.04165e-12
Q13884	SNTB1	-0.767757	3.05557e-07
P37108	SRP14	-0.668527	1.93059e-06
Q9Y3F4	STRAP	-0.612378	6.13362e-09
Q01995	TAGLN	-1.27055	2.80502e-08
Q9Y2S6	TMA7	-0.735322	2.69554e-08
Q13061	TRDN	-0.83739	5.01062e-08
Q9BUF5	TUBB6	-0.934469	1.43793e-08
P68036	UBE2L3	-0.611517	9.37266e-09
P09936	UCHL1	-0.754764	0.00545834
Q04917	YWHAH	-0.975881	2.84017e-07

## Sheet: Table_S8_DirectDIA_IPA_Report
© 2000-2024 QIAGEN. All rights reserved.	DirectDIA
Analysis Details for My Projects->ZBM_CSI_BESD_FIN->BESD_IGT_vs_NGT_DirectDIA_MUSCLE_2 - 2024-01-05 12:37 PM
Workspace	My Projects
Project	ZBM_CSI_BESD_FIN
Analysis	BESD_IGT_vs_NGT_DirectDIA_MUSCLE_2 - 2024-01-05 12:37 PM
Date	Fri Jan 05 03:37:20 PST 2024
Analysis ID	41166083
Analysis Settings
Cutoff before duplicate resolution	true
Resolve duplicate on	Expression logfoldchange
Color using	Expression logfoldchange
Cutoff for Expression logfoldchange	down regulated -0.585 and up regulated 0.585
Cutoff for Expression pvalue	0.05
Reference set	Ingenuity Knowledge Base (Genes Only)
Relationship to include	Direct and Indirect
Includes Endogenous Chemicals	Yes
Optional Analyses	My Pathways My List
Filter Summary
Consider only molecules and/or relationships where
(species = Mouse OR Rat OR Human) AND
(confidence = Experimentally Observed) AND
(tissues = Skeletal Muscle) AND
(mol. types = biologic drug OR canonical pathway OR chemical - endogenous mammalian OR chemical - endogenous non-mammalian OR chemical - kinase inhibitor OR chemical - other OR chemical - protease inhibitor OR chemical drug OR chemical reagent OR chemical toxicant OR complex OR cytokine OR disease OR enzyme OR function OR fusion gene/product OR G-protein coupled receptor OR group OR growth factor…
Canonical Pathways for My Projects->ZBM_CSI_BESD_FIN->BESD_IGT_vs_NGT_DirectDIA_MUSCLE_2 - 2024-01-05 12:37 PM
Ingenuity Canonical Pathways	-log(p-value)	zScore	Ratio	Molecules
AMPK Signaling	0		0.00483	SLC2A1
Activin Inhibin Signaling Pathway	0		0.00629	COL1A1
Adrenomedullin signaling pathway	0		0.00621	RRAS2
Aldosterone Signaling in Epithelial Cells	0		0.00685	HSPB3
Autophagy	0		0.00508	PPP3CA
BBSome Signaling Pathway	0		0.0068	CCT6A,TCP1
Breast Cancer Regulation by Stathmin1	0		0.00543	PPP1R3A,RRAS2
CREB Signaling in Neurons	0		0.00265	RRAS2
CXCR4 Signaling	0		0.00676	RRAS2
Calcium Signaling	0		0.00581	PPP3CA
Circadian Rhythm Signaling	0		0.00459	RRAS2
Class A/1 (Rhodopsin-like receptors)	0		0.00645	F2
Colorectal Cancer Metastasis Signaling	0		0.00467	RRAS2
Endothelin-1 Signaling	0		0.00645	RRAS2
Ephrin Receptor Signaling	0		0.00578	RRAS2
Estrogen Receptor Signaling	0		0.0058	RRAS2,SDHD
FAK Signaling	0		0.00474	COL1A1,RRAS2
G-Protein Coupled Receptor Signaling	0		0.00434	PPP3CA,RRAS2
GNRH Signaling	0		0.00613	RRAS2
Glioblastoma Multiforme Signaling	0		0.00694	RRAS2
Glutaminergic Receptor Signaling Pathway (Enhanced)	0		0.00413	PPP3CA
HER-2 Signaling in Breast Cancer	0		0.00498	RRAS2
Hepatic Cholestasis	0		0.00621	PPP3CA
Hepatic Fibrosis / Hepatic Stellate Cell Activation	0		0.00629	COL1A1
Human Embryonic Stem Cell Pluripotency	0		0.00629	RRAS2
ID1 Signaling Pathway	0		0.00602	RRAS2
IL-12 Signaling and Production in Macrophages	0		0.00602	COL1A1
IL-8 Signaling	0		0.00575	RRAS2
ILK Signaling	0		0.00578	ILK
Molecular Mechanisms of Cancer	0		0.00342	F2,RRAS2
Multiple Sclerosis Signaling Pathway	0		0.0069	HLA-A
NF-κB Signaling	0		0.00645	RRAS2
Oxytocin in Brain Signaling Pathway	0		0.00694	RRAS2
Pancreatic Secretion Signaling Pathway	0		0.00505	PPP1R3A
Phagosome Formation	0		0.00233	RRAS2
Processing of Capped Intron-Containing Pre-mRNA	0		0.00389	HNRNPC
Production of Nitric Oxide and Reactive Oxygen Species in Macrophages	0		0.00637	PPP1R3A
Pulmonary Healing Signaling Pathway	0		0.00637	RRAS2
RAR Activation	0		0.00312	COL1A1
Regulation of the Epithelial Mesenchymal Transition by Growth Factors Pathway	0		0.00633	RRAS2
Regulation of the Epithelial-Mesenchymal Transition Pathway	0		0.00637	RRAS2
Role of Osteoblasts in Rheumatoid Arthritis Signaling Pathway	0		0.00633	COL1A1
S100 Family Signaling Pathway	0		0.00645	ILK,S100A4,S100A6
Serotonin Receptor Signaling	0		0.00277	RRAS2
Synaptic Long Term Depression	0		0.00685	RRAS2
Synaptogenesis Signaling Pathway	0		0.00408	RRAS2
cAMP-mediated signaling	0		0.00621	PPP3CA
Cardiac β-adrenergic Signaling	0.2		0.00704	PPP1R3A
WNT/β-catenin Signaling	0.2		0.00704	ILK
Netrin Signaling	0.202		0.00709	PPP3CA
Gαq Signaling	0.204		0.00714	PPP3CA
Dilated Cardiomyopathy Signaling Pathway	0.221		0.00763	ILK
Erythropoietin Signaling Pathway	0.225		0.00775	RRAS2
Phagosome Maturation	0.225		0.00775	HLA-A
Hereditary Breast Cancer Signaling	0.227		0.00781	RRAS2
Ovarian Cancer Signaling	0.227		0.00781	RRAS2
Transcriptional Regulatory Network in Embryonic Stem Cells	0.227		0.00781	RRAS2
HMGB1 Signaling	0.231		0.00794	RRAS2
Apelin Endothelial Signaling Pathway	0.234		0.008	RRAS2
Type II Diabetes Mellitus Signaling	0.236		0.00806	ACSF2
CDC42 Signaling	0.238		0.00813	HLA-A
IL-10 Signaling	0.238		0.00813	HLA-A
RAC Signaling	0.24		0.0082	RRAS2
Cardiac Hypertrophy Signaling (Enhanced)	0.242		0.00704	HSPB3,PPP3CA,RRAS2
Electron transport, ATP synthesis, and heat production by uncoupling proteins	0.243		0.00826	SDHD
Macrophage Classical Activation Signaling Pathway	0.243		0.00826	SDHD
NAD Signaling Pathway	0.243		0.00826	H1-0
Th1 and Th2 Activation Pathway	0.245		0.00833	HLA-A
HGF Signaling	0.25		0.00847	RRAS2
Reelin Signaling in Neurons	0.25		0.00847	PAFAH1B2
STAT3 Pathway	0.25		0.00847	RRAS2
Endocannabinoid Neuronal Synapse Pathway	0.252		0.00855	PPP3CA
HOTAIR Regulatory Pathway	0.257		0.0087	COL1A1
Endocannabinoid Developing Neuron Pathway	0.259		0.00877	RRAS2
Glioma Signaling	0.259		0.00877	RRAS2
P2Y Purigenic Receptor Signaling Pathway	0.259		0.00877	RRAS2
IL-17 Signaling	0.267		0.00901	RRAS2
Iron homeostasis signaling pathway	0.267		0.00901	FTH1
Renin-Angiotensin Signaling	0.27		0.00909	RRAS2
Role of Macrophages, Fibroblasts and Endothelial Cells in Rheumatoid Arthritis	0.274		0.00784	PPP3CA,RRAS2
NGF Signaling	0.275		0.00926	RRAS2
Regulation of lipid metabolism by PPARalpha	0.275		0.00926	PLIN2
Gap Junction Signaling	0.275		0.00787	PPP3CA,RRAS2
Senescence Pathway	0.277		0.00791	PPP3CA,RRAS2
Role of Chondrocytes in Rheumatoid Arthritis Signaling Pathway	0.278		0.00935	PPP3CA
RHO GTPases Activate Formins	0.28		0.00943	XPO1
G Beta Gamma Signaling	0.283		0.00952	RRAS2
Neuregulin Signaling	0.283		0.00952	RRAS2
Axonal Guidance Signaling	0.286		0.00763	PITRM1,PPP3CA,RRAS2
CCR3 Signaling in Eosinophils	0.286		0.00962	RRAS2
Role of Pattern Recognition Receptors in Recognition of Bacteria and Viruses	0.286		0.00962	EIF2S1
PAK Signaling	0.289		0.00971	RRAS2
Prostate Cancer Signaling	0.289		0.00971	RRAS2
ROBO SLIT Signaling Pathway	0.289		0.00971	CAP1
Gαi Signaling	0.292		0.0098	RRAS2
Oxidative Phosphorylation	0.292		0.0098	SDHD
Cholecystokinin/Gastrin-mediated Signaling	0.298		0.01	RRAS2
IL-27 Signaling Pathway	0.298		0.01	HLA-A
DHCR24 Signaling Pathway	0.301		0.0101	RRAS2
SAPK/JNK Signaling	0.307		0.0103	RRAS2
p38 MAPK Signaling	0.307		0.0103	HSPB3
Phospholipase C Signaling	0.309		0.00847	PPP3CA,RRAS2
Apoptosis Signaling	0.31		0.0104	RRAS2
Paxillin Signaling	0.31		0.0104	RRAS2
Fc Epsilon RI Signaling	0.313		0.0105	RRAS2
L1CAM interactions	0.313		0.0105	SPTA1
Role of NANOG in Mammalian Embryonic Stem Cell Pluripotency	0.313		0.0105	RRAS2
G alpha (q) signalling events	0.317		0.0106	F2
MHC class II antigen presentation	0.317		0.0106	DCTN1
α-Adrenergic Signaling	0.317		0.0106	RRAS2
Chronic Myeloid Leukemia Signaling	0.319		0.00866	PPP3CA,RRAS2
Eicosanoid Signaling	0.319		0.00866	HSPB3,RRAS2
GP6 Signaling Pathway	0.32		0.0108	COL1A1
Mitochondrial translation	0.32		0.0108	MRPL47
Telomerase Signaling	0.32		0.0108	RRAS2
Type I Diabetes Mellitus Signaling	0.32		0.0108	HLA-A
Death Receptor Signaling	0.323		0.0109	HSPB3
Role of MAPK Signaling in Promoting the Pathogenesis of Influenza	0.323		0.0109	RRAS2
Th2 Pathway	0.323		0.0109	HLA-A
Opioid Signaling Pathway	0.325		0.00877	PPP3CA,RRAS2
PPAR Signaling	0.327		0.011	RRAS2
Melanocyte Development and Pigmentation Signaling	0.33		0.0111	RRAS2
UVA-Induced MAPK Signaling	0.33		0.0111	RRAS2
Mouse Embryonic Stem Cell Pluripotency	0.333		0.0112	RRAS2
Insulin Secretion Signaling Pathway	0.336		0.00897	EIF2S1,SLC2A1
Antioxidant Action of Vitamin C	0.337		0.0114	SLC2A1
Cardiac Hypertrophy Signaling	0.34		0.00905	PPP3CA,RRAS2
Kinetochore Metaphase Signaling Pathway	0.341		0.0115	PPP1R3A
Non-Small Cell Lung Cancer Signaling	0.341		0.0115	RRAS2
TGF-β Signaling	0.341		0.0115	RRAS2
Bladder Cancer Signaling	0.344		0.0116	RRAS2
Prolactin Signaling	0.348		0.0118	RRAS2
Th1 Pathway	0.348		0.0118	HLA-A
Neuroinflammation Signaling Pathway	0.351		0.00926	HLA-A,PPP3CA
Amyotrophic Lateral Sclerosis Signaling	0.352		0.0119	PPP3CA
Cargo recognition for clathrin-mediated endocytosis	0.352		0.0119	NEDD8
ERBB Signaling	0.352		0.0119	RRAS2
Integration of energy metabolism	0.352		0.0119	SLC2A1
NER (Nucleotide Excision Repair, Enhanced Pathway)	0.352		0.0119	NEDD8
MSP-RON Signaling in Macrophages Pathway	0.356		0.012	RRAS2
Acute Myeloid Leukemia Signaling	0.36		0.0122	RRAS2
Ceramide Signaling	0.36		0.0122	RRAS2
RANK Signaling in Osteoclasts	0.36		0.0122	PPP3CA
Actin Nucleation by ARP-WASP Complex	0.364		0.0123	RRAS2
Atherosclerosis Signaling	0.368		0.0125	COL1A1
Beta-catenin independent WNT signaling	0.368		0.0125	PPP3CA
PDGF Signaling	0.368		0.0125	RRAS2
Systemic Lupus Erythematosus in B Cell Signaling Pathway	0.37		0.00962	PPP3CA,RRAS2
Extracellular matrix organization	0.372		0.0127	COL1A1
Actin Cytoskeleton Signaling	0.373		0.00966	F2,RRAS2
BMP signaling pathway	0.376		0.0128	RRAS2
PD-1, PD-L1 cancer immunotherapy pathway	0.376		0.0128	HLA-A
ABRA Signaling Pathway	0.38		0.013	PPP3CA
Post-translational protein phosphorylation	0.38		0.013	CALU
LPS-stimulated MAPK Signaling	0.384		0.0132	RRAS2
Opioid Signalling	0.384		0.0132	PPP3CA
Gene Silencing by RNA	0.389		0.0133	PRKRA
PEDF Signaling	0.389		0.0133	RRAS2
Regulation of Cellular Mechanics by Calpain Protease	0.389		0.0133	RRAS2
FLT3 Signaling in Hematopoietic Progenitor Cells	0.393		0.0135	RRAS2
JAK/STAT Signaling	0.393		0.0135	RRAS2
Sertoli Cell-Sertoli Cell Junction Signaling	0.393		0.0101	RRAS2,SPTA1
Sertoli Cell-Germ Cell Junction Signaling Pathway (Enhanced)	0.396		0.0101	ILK,RRAS2
Thrombin Signaling	0.407		0.0103	F2,RRAS2
Interferon gamma signaling	0.407		0.0141	HLA-A
FcγRIIB Signaling in B Lymphocytes	0.412		0.0143	RRAS2
IL-15 Signaling	0.412		0.0143	RRAS2
Neurotrophin/TRK Signaling	0.412		0.0143	RRAS2
trans-Golgi Network Vesicle Budding	0.412		0.0143	FTH1
IL-17A Signaling in Fibroblasts	0.417		0.0145	COL1A1
VEGF Family Ligand-Receptor Interactions	0.417		0.0145	RRAS2
Role of NFAT in Cardiac Hypertrophy	0.421		0.0106	PPP3CA,RRAS2
Angiopoietin Signaling	0.422		0.0147	RRAS2
Cell junction organization	0.422		0.0147	ILK
Dopamine Receptor Signaling	0.422		0.0147	PPP1R3A
Signaling by MET	0.422		0.0147	COL1A1
Caveolar-mediated Endocytosis Signaling	0.427		0.0149	HLA-A
GDNF Family Ligand-Receptor Interactions	0.427		0.0149	RRAS2
Integrin cell surface interactions	0.427		0.0149	COL1A1
Regulation of the Epithelial Mesenchymal Transition in Development Pathway	0.427		0.0149	S100A4
Role of MAPK Signaling in the Pathogenesis of Influenza	0.427		0.0149	RRAS2
Thyroid Cancer Signaling	0.427		0.0149	RRAS2
Chemokine Signaling	0.432		0.0152	RRAS2
NF-κB Activation by Viruses	0.432		0.0152	RRAS2
Integrin Signaling	0.432		0.0108	ILK,RRAS2
Agrin Interactions at Neuromuscular Junction	0.437		0.0154	RRAS2
Macropinocytosis Signaling	0.437		0.0154	RRAS2
Altered T Cell and B Cell Signaling in Rheumatoid Arthritis	0.448		0.0159	HLA-A
Crosstalk between Dendritic Cells and Natural Killer Cells	0.448		0.0159	HLA-A
Ephrin B Signaling	0.448		0.0159	CAP1
Granzyme A Signaling	0.448		0.0159	H1-0
Translocation of SLC2A4 (GLUT4) to the plasma membrane	0.448		0.0159	YWHAQ
IL-7 Signaling Pathway	0.453		0.0161	SLC2A1
Pyridoxal 5'-phosphate Salvage Pathway	0.453		0.0161	PNPO
Antiproliferative Role of Somatostatin Receptor 2	0.459		0.0164	RRAS2
Role of Tissue Factor in Cancer	0.46		0.0114	F2,RRAS2
Extra-nuclear estrogen signaling	0.465		0.0167	XPO1
Glioma Invasiveness Signaling	0.465		0.0167	RRAS2
Role of Osteoblasts, Osteoclasts and Chondrocytes in Rheumatoid Arthritis	0.466		0.0115	COL1A1,PPP3CA
Intra-Golgi and retrograde Golgi-to-ER traffic	0.472		0.0116	DCTN1,PAFAH1B2
ERBB4 Signaling	0.477		0.0172	RRAS2
PPARα/RXRα Activation	0.489		0.012	ACAA1,RRAS2
Communication between Innate and Adaptive Immune Cells	0.489		0.0179	HLA-A
ERB2-ERBB3 Signaling	0.489		0.0179	RRAS2
Mitotic Prometaphase	0.493		0.012	DCTN1,XPO1
Deadenylation-dependent mRNA decay	0.496		0.0182	EIF4B
T Helper Cell Differentiation	0.496		0.0182	HLA-A
Thrombopoietin Signaling	0.496		0.0182	RRAS2
WNT/Ca+ pathway	0.496		0.0182	PPP3CA
Clathrin-mediated Endocytosis Signaling	0.496		0.0121	F2,PPP3CA
B Cell Receptor Signaling	0.5		0.0122	PPP3CA,RRAS2
MicroRNA Biogenesis Signaling Pathway	0.5		0.0122	PRKRA,RRAS2
Glucocorticoid Receptor Signaling	0.5		0.0098	HLA-A,PPP3CA,RRAS2,SDHD
Role of JAK1 and JAK3 in γc Cytokine Signaling	0.502		0.0185	RRAS2
Sensory processing of sound by inner hair cells of the cochlea	0.502		0.0185	XIRP2
Collagen biosynthesis and modifying enzymes	0.516		0.0192	COL1A1
NCAM signaling for neurite out-growth	0.516		0.0192	SPTA1
IL-2 Signaling	0.523		0.0196	RRAS2
Intrinsic Pathway for Apoptosis	0.523		0.0196	YWHAQ
Transcriptional Regulation by MECP2	0.523		0.0196	PVALB
CNTF Signaling	0.53		0.02	RRAS2
Interferon alpha/beta signaling	0.53		0.02	HLA-A
Transport of bile salts and organic acids, metal ions and amine compounds	0.537		0.0204	SLC16A3
UVC-Induced MAPK Signaling	0.537		0.0204	RRAS2
Cancer Drug Resistance by Drug Efflux	0.545		0.0208	RRAS2
Dopamine-DARPP32 Feedback in cAMP Signaling	0.548		0.0132	PPP1R3A,PPP3CA
CTLA4 Signaling in Cytotoxic T Lymphocytes	0.552		0.0133	HLA-A,RRAS2
CSDE1 Signaling Pathway	0.553		0.0213	HNRNPC
Cell Cycle: G2/M DNA Damage Checkpoint Regulation	0.553		0.0213	YWHAQ
PXR/RXR Activation	0.553		0.0213	GSTM1
Germ Cell-Sertoli Cell Junction Signaling	0.556		0.0134	ILK,RRAS2
E3 ubiquitin ligases ubiquitinate target proteins	0.56		0.0217	HLA-A
Triacylglycerol Biosynthesis	0.56		0.0217	DBT
CLEAR Signaling Pathway	0.561		0.0115	PPP3CA,RRAS2,YWHAQ
HSP90 chaperone cycle for steroid hormone receptors in the presence of ligand	0.569		0.0222	DCTN1
Melanoma Signaling	0.569		0.0222	RRAS2
XBP1(S) activates chaperone genes	0.569		0.0222	DCTN1
Epithelial Adherens Junction Signaling	0.577		0.0139	RRAS2,YWHAQ
Apoptotic execution phase	0.577		0.0227	H1-0
Transcriptional regulation by RUNX2	0.577		0.0227	COL1A1
IL-4 Signaling	0.581		0.014	COL1A1,RRAS2
Heme signaling	0.585		0.0233	XPO1
PFKFB4 Signaling Pathway	0.585		0.0233	AMPD1
SPINK1 General Cancer Pathway	0.585		0.0233	RRAS2
SUMOylation of RNA binding proteins	0.585		0.0233	HNRNPC
Assembly of collagen fibrils and other multimeric structures	0.594		0.0238	COL1A1
Acute Phase Response Signaling	0.603		0.0145	F2,RRAS2
PTEN Signaling	0.603		0.0145	ILK,RRAS2
Regulation of mRNA stability by proteins that bind AU-rich elements	0.603		0.0244	XPO1
Dendritic Cell Maturation	0.607		0.0146	COL1A1,HLA-A
Ion channel transport	0.612		0.0147	CUTC,STOM
OX40 Signaling Pathway	0.622		0.0256	HLA-A
Sensory processing of sound by outer hair cells of the cochlea	0.622		0.0256	XIRP2
T Cell Exhaustion Signaling Pathway	0.635		0.0153	HLA-A,RRAS2
PI3K Signaling in B Lymphocytes	0.64		0.0154	PPP3CA,RRAS2
Collagen degradation	0.653		0.0278	COL1A1
DNA Damage/Telomere Stress Induced Senescence	0.653		0.0278	H1-0
Mechanisms of Viral Exit from Host Cells	0.653		0.0278	XPO1
Pyrimidine Ribonucleotides De Novo Biosynthesis	0.653		0.0278	DDX3X
nNOS Signaling in Skeletal Muscle Cells	0.653		0.0278	SNTB1
Role of Osteoclasts in Rheumatoid Arthritis Signaling Pathway	0.656		0.0129	COL1A1,PPP3CA,RRAS2
Hepatic Fibrosis Signaling Pathway	0.662		0.0116	COL1A1,FTH1,RRAS2,SDHD
Oncostatin M Signaling	0.663		0.0286	RRAS2
nNOS Signaling in Neurons	0.663		0.0286	PPP3CA
Oxytocin Signaling Pathway	0.666		0.013	HSPB3,PPP3CA,RRAS2
Insulin Receptor Signaling	0.676		0.0163	PPP1R3A,RRAS2
Necroptosis Signaling Pathway	0.676		0.0163	PPP3CA,TIMM50
Autism Signaling Pathway	0.685		0.0133	DBT,HLA-A,RRAS2
Pyrimidine Ribonucleotides Interconversion	0.686		0.0303	DDX3X
WNT/SHH Axonal Guidance Signaling Pathway	0.686		0.0165	ILK,YWHAQ
Allograft Rejection Signaling	0.698		0.0312	HLA-A
Autoimmune Thyroid Disease Signaling	0.698		0.0312	HLA-A
Collagen chain trimerization	0.698		0.0312	COL1A1
Complement cascade	0.698		0.0312	F2
Detoxification of Reactive Oxygen Species	0.698		0.0312	GSR
Gamma carboxylation, hypusine formation and arylsulfatase activation	0.698		0.0312	F2
Pathogen Induced Cytokine Storm Signaling Pathway	0.7		0.0136	COL1A1,FTH1,SLC2A1
Transcriptional Regulation by NPAS4	0.723		0.0333	XPO1
MSP-RON Signaling in Cancer Cells Pathway	0.725		0.0175	RRAS2,YWHAQ
Cytotoxic T Lymphocyte-mediated Apoptosis of Target Cells	0.736		0.0345	HLA-A
Graft-versus-Host Disease Signaling	0.736		0.0345	HLA-A
Gα12/13 Signaling	0.737		0.0179	F2,RRAS2
14-3-3-mediated Signaling	0.743		0.018	RRAS2,YWHAQ
Late endosomal microautophagy	0.75		0.0357	PLIN2
MTOR signalling	0.75		0.0357	EIF4B
Ferroptosis Signaling Pathway	0.755		0.0183	FTH1,RRAS2
Role of PKR in Interferon Induction and Antiviral Response	0.755		0.0183	EIF2S1,PRKRA
fMLP Signaling in Neutrophils	0.755		0.0183	PPP3CA,RRAS2
Superpathway of Inositol Phosphate Compounds	0.762		0.0146	PANK4,PPP1R3A,PPP3CA
Antigen Presentation Pathway	0.764		0.037	HLA-A
Estrogen Biosynthesis	0.764		0.037	HSD17B12
Response to elevated platelet cytosolic Ca2+	0.774		0.0189	CALU,CAP1
GPVI-mediated activation cascade	0.779		0.0385	COL1A1
RHO GTPases activate PKNs	0.779		0.0385	YWHAQ
CDK5 Signaling	0.787		0.0192	PPP1R3A,RRAS2
Thrombin signalling through proteinase activated receptors (PARs)	0.795		0.04	F2
Virus Entry via Endocytic Pathways	0.807		0.0198	HLA-A,RRAS2
Metabolism of steroid hormones	0.811		0.0417	HSD17B12
Nucleotide catabolism	0.811		0.0417	NT5C1A
Oxidative Ethanol Degradation III	0.811		0.0417	ACSS1
Coagulation System	0.828		0.0435	F2
Glyoxylate metabolism and glycine degradation	0.828		0.0435	DBT
CD28 Signaling in T Helper Cells	0.835		0.0206	HLA-A,PPP3CA
IGF-1 Signaling	0.835		0.0206	RRAS2,YWHAQ
RHO GTPase cycle	0.835	-2.23607	0.0125	CCT6A,DBT,HNRNPC,RRAS2,STOM
Apelin Liver Signaling Pathway	0.846		0.0455	COL1A1
B Cell Development	0.846		0.0455	HLA-A
Ethanol Degradation II	0.846		0.0455	ACSS1
Formation of Fibrin Clot (Clotting Cascade)	0.846		0.0455	F2
Mitochondrial Fatty Acid Beta-Oxidation	0.846		0.0455	MECR
Syndecan interactions	0.846		0.0455	COL1A1
TR/RXR Activation	0.856		0.0213	SLC16A3,SLC2A1
Ethanol Degradation IV	0.865		0.0476	ACSS1
Cilium Assembly	0.869		0.0164	CCT6A,DCTN1,TCP1
Sleep NREM Signaling Pathway	0.871		0.0217	RRAS2,YWHAQ
3-phosphoinositide Biosynthesis	0.88		0.0166	PANK4,PPP1R3A,PPP3CA
Systemic Lupus Erythematosus in T Cell Signaling Pathway	0.88		0.0166	HLA-A,PPP3CA,RRAS2
Endoplasmic Reticulum Stress Pathway	0.885		0.05	EIF2S1
Glycolysis I	0.885		0.05	BPGM
Interconversion of nucleotide di- and triphosphates	0.885		0.05	GSR
Nucleotide salvage	0.885		0.05	AMPD1
VEGF Signaling	0.887		0.0222	EIF2S1,RRAS2
COPI-mediated anterograde transport	0.895		0.0225	DCTN1,SPTA1
ICOS-ICOSL Signaling in T Helper Cells	0.903		0.0227	HLA-A,PPP3CA
Regulation of IL-2 Expression in Activated and Anergic T Lymphocytes	0.903		0.0227	PPP3CA,RRAS2
Regulation of Insulin-like Growth Factor (IGF) transport and uptake by IGFBPs	0.903		0.0227	CALU,F2
FOXO-mediated transcription	0.905		0.0526	YWHAQ
Gluconeogenesis I	0.905		0.0526	BPGM
D-myo-inositol-5-phosphate Metabolism	0.911		0.0171	PANK4,PPP1R3A,PPP3CA
PI3K/AKT Signaling	0.917		0.0172	ILK,RRAS2,YWHAQ
Wound Healing Signaling Pathway	0.922		0.0173	COL1A1,F2,RRAS2
Chaperone Mediated Autophagy	0.927		0.0556	PLIN2
TCA Cycle II (Eukaryotic)	0.927		0.0556	SDHD
3-phosphoinositide Degradation	0.933		0.0175	PANK4,PPP1R3A,PPP3CA
TP53 Regulates Metabolic Genes	0.936		0.0238	GSR,YWHAQ
Myelination Signaling Pathway	0.946	-2	0.0151	ILK,PPP3CA,RRAS2,SLC2A1
NAD Salvage Pathway II	0.951		0.0588	NT5C1A
Unfolded Protein Response (UPR)	0.951		0.0588	EIF2S1
Coronavirus Pathogenesis Pathway	0.962		0.0181	RPS14,RPS15,RPS24
Protein folding	0.962		0.0247	CCT6A,TCP1
Isoleucine Degradation I	0.976		0.0625	BCAT2
Metabolism of porphyrins	0.976		0.0625	ALAD
HIF1α Signaling	0.979		0.0184	PPP3CA,RRAS2,SLC2A1
HIPPO signaling	0.98		0.0253	PPP1R3A,YWHAQ
Pulmonary Fibrosis Idiopathic Signaling Pathway	0.982	-2	0.0156	COL1A1,F2,ILK,RRAS2
D-myo-inositol (1,4,5,6)-Tetrakisphosphate Biosynthesis	0.997		0.0187	PANK4,PPP1R3A,PPP3CA
D-myo-inositol (3,4,5,6)-tetrakisphosphate Biosynthesis	0.997		0.0187	PANK4,PPP1R3A,PPP3CA
Mitochondrial L-carnitine Shuttle Pathway	1		0.0667	ACSF2
NFE2L2 regulating anti-oxidant/detoxification enzymes	1		0.0667	GSR
Response of EIF2AK1 (HRI) to heme deficiency	1		0.0667	EIF2S1
ISGylation Signaling Pathway	1.01		0.0263	RPS15,S100A4
T Cell Receptor Signaling	1.02		0.0191	HLA-A,PPP3CA,RRAS2
Methylglyoxal Degradation III	1.03		0.0714	AKR7A2
RAN Signaling	1.03		0.0714	XPO1				1.30103
γ-linolenate Biosynthesis II (Animals)	1.03		0.0714	ACSF2
Apelin Adipocyte Signaling Pathway	1.04		0.0274	GSTK1,GSTM1
IL-3 Signaling	1.05		0.0278	PPP3CA,RRAS2
Systemic Lupus Erythematosus Signaling	1.05		0.0197	HLA-A,HNRNPC,RRAS2
ERK5 Signaling	1.06		0.0282	RRAS2,YWHAQ
Renal Cell Carcinoma Signaling	1.06		0.0282	RRAS2,SLC2A1
NUR77 Signaling in T Lymphocytes	1.07		0.0286	HLA-A,PPP3CA
Protein Kinase A Signaling	1.07	-0.447214	0.0149	H1-0,PPP1R3A,PPP3CA,TIMM50,YWHAQ
Natural Killer Cell Signaling	1.08		0.0204	COL1A1,HLA-A,RRAS2
Estrogen-Dependent Breast Cancer Signaling	1.09		0.0294	HSD17B12,RRAS2
Cellular hexose transport	1.09		0.0833	SLC2A1
Purine Nucleotides Degradation II (Aerobic)	1.09		0.0833	NT5C1A
Immunoregulatory interactions between a Lymphoid and a non-Lymphoid cell	1.12		0.0308	COL1A1,HLA-A
Fatty Acid Activation	1.13		0.0909	ACSF2
Leukotriene Biosynthesis	1.13		0.0909	GSTM4
GM-CSF Signaling	1.15		0.0317	PPP3CA,RRAS2
Phase I - Functionalization of compounds	1.15		0.0317	ACSS1,NQO2
Adenosine Nucleotides Degradation II	1.17		0.1	NT5C1A
Guanosine Nucleotides Degradation III	1.17		0.1	NT5C1A
Urate Biosynthesis/Inosine 5'-phosphate Degradation	1.17		0.1	NT5C1A
Neuroprotective Role of THOP1 in Alzheimer's Disease	1.18		0.0333	HLA-A,LONP1
Mitochondrial protein import	1.2		0.0339	CHCHD2,TIMM50
PKCθ Signaling in T Lymphocytes	1.21		0.0231	HLA-A,PPP3CA,RRAS2
Extrinsic Prothrombin Activation Pathway	1.22		0.111	F2
Leucine Degradation I	1.22		0.111	BCAT2
Lipophagy	1.22		0.111	PLIN2
Platelet Adhesion to exposed collagen	1.22		0.111	COL1A1
Xenobiotic Metabolism CAR Signaling Pathway	1.25		0.024	GSTK1,GSTM1,GSTM4
GP1b-IX-V activation signalling	1.26		0.125	COL1A1
Endometrial Cancer Signaling	1.27		0.037	ILK,RRAS2
Peroxisomal protein import	1.27		0.037	ACAA1,GSTK1
Mitochondrial Dysfunction	1.27	0	0.017	GSR,GSTK1,GSTM1,PPP3CA,SDHD
FXR/RXR Activation	1.28		0.0248	GSTK1,GSTM1,GSTM4
p70S6K Signaling	1.28		0.0248	F2,RRAS2,YWHAQ
Stearate Biosynthesis I (Animals)	1.29		0.0385	ACSF2,DBT
Metabolism of water-soluble vitamins and cofactors	1.31		0.0392	PNPO,SLC2A1
Neutrophil Extracellular Trap Signaling Pathway	1.31	-1.34164	0.0175	COL1A1,PPP3CA,SDHD,SLC2A1,TIMM50
Azathioprine ADME	1.32		0.143	GSTM1
TYSND1 cleaves peroxisomal proteins	1.32		0.143	ACAA1
The citric acid (TCA) cycle and respiratory electron transport	1.33		0.04	SDHD,SLC16A3
Calcium-induced T Lymphocyte Apoptosis	1.34		0.0408	HLA-A,PPP3CA
Signaling by TGF-beta Receptor Complex	1.34		0.0408	NEDD8,XPO1
Synaptic Long Term Potentiation	1.36		0.0268	PPP1R3A,PPP3CA,RRAS2
IL-6 Signaling	1.37		0.027	COL1A1,HSPB3,RRAS2
ERK/MAPK Signaling	1.4		0.0216	HSPB3,PPP1R3A,RRAS2,YWHAQ
Acetate Conversion to Acetyl-CoA	1.46		0.2	ACSS1
Acetyl-CoA Biosynthesis I (Pyruvate Dehydrogenase Complex)	1.46		0.2	DBT
Sirtuin Signaling Pathway	1.5		0.0198	BPGM,H1-0,SDHD,SLC2A1,TIMM50
Cell surface interactions at the vascular wall	1.51		0.0306	COL1A1,F2,SLC16A3
Branched-chain α-keto acid Dehydrogenase Complex	1.56		0.25	DBT
Glutathione Redox Reactions II	1.56		0.25	GSR
Rapoport-Luebering Glycolytic Shunt	1.56		0.25	BPGM
Role of NFAT in Regulation of the Immune Response	1.59		0.0248	HLA-A,PPP3CA,RRAS2,XPO1
Gene and protein expression by JAK-STAT signaling after IL-12 stimulation	1.66		0.0606	PSME2,TCP1
Binding and Uptake of Ligands by Scavenger Receptors	1.74		0.0667	COL1A1,FTH1
Xenobiotic Metabolism Signaling	1.76		0.0231	GSTK1,GSTM1,GSTM4,NQO2,RRAS2
Tumor Microenvironment Pathway	1.82	-1	0.0292	COL1A1,HLA-A,RRAS2,SLC2A1
Fatty Acid β-oxidation I	1.82		0.0741	ACAA1,ACSF2
Lactose synthesis	1.86		0.5	SLC2A1
Xenobiotic Metabolism PXR Signaling Pathway	1.87	0	0.0303	GSTK1,GSTM1,GSTM4,PPP1R3A
mTOR Signaling	2.05		0.0273	EIF4B,RPS14,RPS15,RPS24,RRAS2
Intrinsic Prothrombin Activation Pathway	2.08		0.1	COL1A1,F2
Valine Degradation I	2.12		0.105	BCAT2,DBT
Vitamin-C Transport	2.12		0.105	SLC2A1,STOM
Branched-chain amino acid catabolism	2.17		0.111	BCAT2,DBT
LPS/IL-1 Mediated Inhibition of RXR Function	2.25		0.0307	ACSF2,GSTK1,GSTM1,GSTM4,XPO1
Iron uptake and transport	2.27		0.0588	ALAD,FTH1,NEDD8
Regulation of eIF4 and p70S6K Signaling	2.31		0.0316	EIF2S1,RPS14,RPS15,RPS24,RRAS2
Cachexia Signaling Pathway	2.43	-1.88982	0.0246	EIF2S1,PSMA2,PSMB1,PSMC1,PSMD11,PSMD6,PSME2
Class I MHC mediated antigen processing and presentation	2.56	-2.82843	0.0232	HLA-A,PSMA2,PSMB1,PSMC1,PSMD11,PSMD6,PSME2,RNF123
tRNA Charging	2.67		0.0811	DARS1,FARSB,WARS1
Chaperone Mediated Autophagy Signaling Pathway	2.7	0.816497	0.0319	DDX3X,PLIN2,PPP3CA,PSMA2,PSMB1,PSME2
Heme Biosynthesis II	2.88		0.25	ALAD,HMBS
Major pathway of rRNA processing in the nucleolus and cytosol	2.95	-2.44949	0.0357	RPL13,RPL27A,RPL32,RPS14,RPS15,RPS24
Neddylation	3	-2.64575	0.031	NEDD8,PSMA2,PSMB1,PSMC1,PSMD11,PSMD6,PSME2
Platelet Aggregation (Plug Formation)	3.01		0.286	COL1A1,F2
Xenobiotic Metabolism AHR Signaling Pathway	3.02	0	0.0635	GSTK1,GSTM1,GSTM4,NQO2
RAF/MAP kinase cascade	3.03	-2.64575	0.0314	PSMA2,PSMB1,PSMC1,PSMD11,PSMD6,PSME2,SPTA1
Xenobiotic Metabolism General Signaling Pathway	3.05	-0.447214	0.0467	GSTK1,GSTM1,GSTM4,NQO2,RRAS2
Mitotic Metaphase and Anaphase	3.33	-2.64575	0.0352	PSMA2,PSMB1,PSMC1,PSMD11,PSMD6,PSME2,XPO1
Glutathione-mediated Detoxification	3.4		0.143	GSTK1,GSTM1,GSTM4
PTEN Regulation	3.43	-2.44949	0.0441	PSMA2,PSMB1,PSMC1,PSMD11,PSMD6,PSME2
Protein Ubiquitination Pathway	3.44		0.0317	HLA-A,HSPB3,PSMA2,PSMB1,PSMC1,PSMD11,PSMD6,PSME2
Glutathione Redox Reactions I	3.53		0.158	GSR,GSTK1,GSTM1
Tetrapyrrole Biosynthesis II	3.55		0.5	ALAD,HMBS
Huntington's Disease Signaling	3.57		0.0332	DCTN1,PSMA2,PSMB1,PSMC1,PSMD11,PSMD6,PSME2,SDHD
Aryl Hydrocarbon Receptor Signaling	3.58		0.0469	GSTK1,GSTM1,GSTM4,HSPB3,NEDD8,NQO2
Transcriptional regulation by RUNX1	3.61	-2.44949	0.0476	PSMA2,PSMB1,PSMC1,PSMD11,PSMD6,PSME2
Mitotic G1 phase and G1/S transition	3.69	-2.44949	0.0492	PSMA2,PSMB1,PSMC1,PSMD11,PSMD6,PSME2
Deubiquitination	3.72	-2.82843	0.0349	NEDD8,PSMA2,PSMB1,PSMC1,PSMD11,PSMD6,PSME2,RNF123
Cell Cycle Checkpoints	3.77	-2.82843	0.0356	PSMA2,PSMB1,PSMC1,PSMD11,PSMD6,PSME2,XPO1,YWHAQ
Interleukin-1 family signaling	3.85	-2.44949	0.0526	PSMA2,PSMB1,PSMC1,PSMD11,PSMD6,PSME2
TCF dependent signaling in response to WNT	3.91	-2.64575	0.0437	PSMA2,PSMB1,PSMC1,PSMD11,PSMD6,PSME2,XPO1
Synthesis of DNA	3.91	-2.44949	0.0541	PSMA2,PSMB1,PSMC1,PSMD11,PSMD6,PSME2
TCR signaling	4.03	-2.44949	0.0566	PSMA2,PSMB1,PSMC1,PSMD11,PSMD6,PSME2
Hedgehog 'off' state	4.05	-2.44949	0.0571	PSMA2,PSMB1,PSMC1,PSMD11,PSMD6,PSME2
Nonsense-Mediated Decay (NMD)	4.05	-2.44949	0.0571	RPL13,RPL27A,RPL32,RPS14,RPS15,RPS24
Neutrophil degranulation	4.13	-2.7136	0.0285	ACAA1,ALAD,CAP1,DDX3X,FTH1,PAFAH1B2,PSMA2,PSMB1,PSMD11,PSMD6,STOM
Inhibition of ARE-Mediated mRNA Degradation Pathway	4.14		0.0476	PSMA2,PSMB1,PSMC1,PSMD11,PSMD6,PSME2,YWHAQ
S Phase	4.29	-2.44949	0.0632	PSMA2,PSMB1,PSMC1,PSMD11,PSMD6,PSME2
Microautophagy Signaling Pathway	4.31	-2.44949	0.0507	COL1A1,PSMA2,PSMB1,PSMC1,PSMD11,PSMD6,PSME2
Transcriptional regulation by RUNX3	4.37	-2.44949	0.0652	PSMA2,PSMB1,PSMC1,PSMD11,PSMD6,PSME2
DNA Replication Pre-Initiation	4.48	-2.44949	0.0682	PSMA2,PSMB1,PSMC1,PSMD11,PSMD6,PSME2
NRF2-mediated Oxidative Stress Response	4.5		0.0452	AKR7A2,FTH1,GSR,GSTK1,GSTM1,GSTM4,NQO2,RRAS2
Mitotic G2-G2/M phases	4.55	-2.82843	0.046	DCTN1,PSMA2,PSMB1,PSMC1,PSMD11,PSMD6,PSME2,XPO1
Fc epsilon receptor (FCERI) signaling	4.59	-2.64575	0.056	PPP3CA,PSMA2,PSMB1,PSMC1,PSMD11,PSMD6,PSME2
KEAP1-NFE2L2 pathway	4.6	-2.44949	0.0714	PSMA2,PSMB1,PSMC1,PSMD11,PSMD6,PSME2
Degradation of beta-catenin by the destruction complex	4.62	-2.44949	0.0723	PSMA2,PSMB1,PSMC1,PSMD11,PSMD6,PSME2
Eukaryotic Translation Elongation	4.62	-2.44949	0.0723	RPL13,RPL27A,RPL32,RPS14,RPS15,RPS24
Eukaryotic Translation Termination	4.66	-2.44949	0.0732	RPL13,RPL27A,RPL32,RPS14,RPS15,RPS24
Regulation of mitotic cell cycle	4.69	-2.44949	0.0741	PSMA2,PSMB1,PSMC1,PSMD11,PSMD6,PSME2
Hedgehog 'on' state	4.75	-2.44949	0.0759	PSMA2,PSMB1,PSMC1,PSMD11,PSMD6,PSME2
BAG2 Signaling Pathway	4.78		0.0769	PSMA2,PSMB1,PSMC1,PSMD11,PSMD6,PSME2
Signaling by NOTCH4	4.78	-2.44949	0.0769	PSMA2,PSMB1,PSMC1,PSMD11,PSMD6,PSME2
Cellular response to hypoxia	5.09	-2.44949	0.087	PSMA2,PSMB1,PSMC1,PSMD11,PSMD6,PSME2
EIF2 Signaling	5.11	-1.34164	0.0466	EIF2S1,RPL13,RPL27A,RPL32,RPS14,RPS15,RPS24,RRAS2,WARS1
Signaling by ROBO receptors	5.14	-2.64575	0.068	CAP1,PSMA2,PSMB1,PSMC1,PSMD11,PSMD6,PSME2
Signaling by the B Cell Receptor (BCR)	5.14	-2.64575	0.068	PPP3CA,PSMA2,PSMB1,PSMC1,PSMD11,PSMD6,PSME2
SRP-dependent cotranslational protein targeting to membrane	5.17	-2.64575	0.0686	RPL13,RPL27A,RPL32,RPN2,RPS14,RPS15,RPS24
Regulation of RUNX2 expression and activity	5.2	-2.44949	0.0909	PSMA2,PSMB1,PSMC1,PSMD11,PSMD6,PSME2
TNFR2 non-canonical NF-kB pathway	5.24	-2.44949	0.0923	PSMA2,PSMB1,PSMC1,PSMD11,PSMD6,PSME2
Selenoamino acid metabolism	5.44	-2.64575	0.0753	GSR,RPL13,RPL27A,RPL32,RPS14,RPS15,RPS24
Hedgehog ligand biogenesis	5.49	-2.44949	0.102	PSMA2,PSMB1,PSMC1,PSMD11,PSMD6,PSME2
ABC-family proteins mediated transport	5.5	-2.64575	0.0769	EIF2S1,PSMA2,PSMB1,PSMC1,PSMD11,PSMD6,PSME2
Response of EIF2AK4 (GCN2) to amino acid deficiency	5.5	-2.64575	0.0769	EIF2S1,RPL13,RPL27A,RPL32,RPS14,RPS15,RPS24
Metabolism of polyamines	5.58	-2.44949	0.105	PSMA2,PSMB1,PSMC1,PSMD11,PSMD6,PSME2
FAT10 Signaling Pathway	5.77		0.113	PSMA2,PSMB1,PSMC1,PSMD11,PSMD6,PSME2
MAPK6/MAPK4 signaling	5.77		0.0843	PSMA2,PSMB1,PSMC1,PSMD11,PSMD6,PSME2,XPO1
Regulation of Apoptosis	5.92	-2.44949	0.12	PSMA2,PSMB1,PSMC1,PSMD11,PSMD6,PSME2
C-type lectin receptors (CLRs)	5.94	-2.82843	0.0708	NEDD8,PPP3CA,PSMA2,PSMB1,PSMC1,PSMD11,PSMD6,PSME2
Eukaryotic Translation Initiation	6.06	-2.82843	0.0734	EIF2S1,EIF4B,RPL13,RPL27A,RPL32,RPS14,RPS15,RPS24
NIK-->noncanonical NF-kB signaling	6.9	-2.64575	0.123	NEDD8,PSMA2,PSMB1,PSMC1,PSMD11,PSMD6,PSME2
Upstream Regulators for My Projects->ZBM_CSI_BESD_FIN->BESD_IGT_vs_NGT_DirectDIA_MUSCLE_2 - 2024-01-05 12:37 PM
Analysis	ID	Upstream Regulator	Expr Log Ratio	Molecule Type	Predicted Activation State	Activation z-score	Notes	Bias Term	Bias-corrected z-score	p-value of overlap	Target molecules in dataset	Mechanistic Network
BESD_IGT_vs_NGT_DirectDIA_MUSCLE_2 - 2024-01-05 12:37 PM		DMD	-0.021	other						0.00124	CCT6A,FTH1,PVALB
BESD_IGT_vs_NGT_DirectDIA_MUSCLE_2 - 2024-01-05 12:37 PM		SLC2A4		transporter						0.00689	SLC2A1
BESD_IGT_vs_NGT_DirectDIA_MUSCLE_2 - 2024-01-05 12:37 PM		UCP1		transporter		-1.067	bias	-0.321	-0.432	0.00866	BCAT2,DBT,GSR,GSTM1
BESD_IGT_vs_NGT_DirectDIA_MUSCLE_2 - 2024-01-05 12:37 PM		SLC16A2		transporter						0.0273	SLC16A3
BESD_IGT_vs_NGT_DirectDIA_MUSCLE_2 - 2024-01-05 12:37 PM		YAP1		transcription regulator						0.0273	AMPD1
BESD_IGT_vs_NGT_DirectDIA_MUSCLE_2 - 2024-01-05 12:37 PM		GADD45GIP1		other						0.034	LONP1
BESD_IGT_vs_NGT_DirectDIA_MUSCLE_2 - 2024-01-05 12:37 PM		PPARA		ligand-dependent nuclear receptor						0.0472	PLIN2
Causal Networks for My Projects->ZBM_CSI_BESD_FIN->BESD_IGT_vs_NGT_DirectDIA_MUSCLE_2 - 2024-01-05 12:37 PM
Master Regulator	Molecule Type	Expr Log Ratio	Depth	Predicted Activation State	Notes	Activation z-score	p-value of overlap	Network bias-corrected p-value	Participating regulators	Target molecules in dataset	Causal network	Target-connected regulators	Relationships Between Master Regulators(Increases/Downstream)	Relationships Between Master Regulators(Decreases/Downstream)	Relationships Between Master Regulators(Affects/Downstream)	Relationships Between Master Regulators(Increases/Upstream)	Relationships Between Master Regulators(Decreases/Upstream)	Relationships Between Master Regulators(Affects/Upstream)	Relationships Between Master Regulators(Increases/Both)	Relationships Between Master Regulators(Decreases/Both)	Relationships Between Master Regulators(Affects/Both)
UCP1	transporter		1		biased	-1	0.00841	0.016	UCP1	BCAT2,DBT,GSR,GSTM1	4 (1)	1
SLC16A2	transporter		1		biased	1	0.0273	0.0192	SLC16A2	SLC16A3	1 (1)	1
YAP1	transcription regulator		1			-1	0.0273	0.0199	YAP1	AMPD1	1 (1)	1
GADD45GIP1	other		1		biased	1	0.034	0.0239	GADD45GIP1	LONP1	1 (1)	1
SCD	enzyme		1		biased	-1	0.0796	0.0388	SCD	SLC2A1	1 (1)	1
Diseases and Bio Functions for My Projects->ZBM_CSI_BESD_FIN->BESD_IGT_vs_NGT_DirectDIA_MUSCLE_2 - 2024-01-05 12:37 PM
Categories	Functions	Diseases or Functions Annotation	p-Value	Predicted Activation State	Activation z-score	Notes	Bias-corrected z-score	Molecules	# Molecules
Cell-To-Cell Signaling and Interaction	density	Density of neuromuscular junctions	0.00696					HLA-A	1
Organ Morphology, Organismal Development, Organismal Injury and Abnormalities, Skeletal and Muscular Disorders, Skeletal and Muscular System Development and Function	abnormal morphology	Abnormal morphology of anterior tibial muscle	0.0207					SGCG	1
Organismal Injury and Abnormalities, Renal and Urological Disease, Skeletal and Muscular Disorders	tubulo-interstitial fibrosis	Tubulo-interstitial fibrosis of skeletal muscle	0.0207					SGCG	1
Tox Functions for My Projects->ZBM_CSI_BESD_FIN->BESD_IGT_vs_NGT_DirectDIA_MUSCLE_2 - 2024-01-05 12:37 PM
Categories	Functions	Diseases or Functions Annotation	p-Value	Predicted Activation State	Activation z-score	Notes	Bias-corrected z-score	Molecules	# Molecules
Glomerular Injury, Kidney Failure, Renal Fibrosis	tubulo-interstitial fibrosis	Tubulo-interstitial fibrosis of skeletal muscle	0.0207					SGCG	1
Regulator Effects for My Projects->ZBM_CSI_BESD_FIN->BESD_IGT_vs_NGT_DirectDIA_MUSCLE_2 - 2024-01-05 12:37 PM
Networks for My Projects->ZBM_CSI_BESD_FIN->BESD_IGT_vs_NGT_DirectDIA_MUSCLE_2 - 2024-01-05 12:37 PM
ID	Analysis	Molecules in Network	Score	Focus Molecules	Top Diseases and Functions
1	BESD_IGT_vs_NGT_DirectDIA_MUSCLE_2 - 2024-01-05 12:37 PM	ACACA,ACADL,ACSS1,ALDH1A1,ANKRD1,BCAT2,CA2,COL1A1,CPT1B,DBT,EIF4EBP1,FBP2,GSR,GSTM1,HSF1,LDLR,LEP,LIPE,MED1,NRIP1,PCK1,PCK2,PHKG1,PLIN2,PPARA,PPARD,PPP1R3A,PRKAG3,PVALB,SCD,SDHD,SLC2A1,SLC2A4,UCP1,let-7	12	11	Lipid Metabolism, Molecular Transport, Small Molecule Biochemistry
2	BESD_IGT_vs_NGT_DirectDIA_MUSCLE_2 - 2024-01-05 12:37 PM	CCT6A,DMD,FTH1,HDAC4,MYOM2,SGCG,SNTB1	6	4	Embryonic Development, Organ Development, Organismal Development
3	BESD_IGT_vs_NGT_DirectDIA_MUSCLE_2 - 2024-01-05 12:37 PM	SLC16A2,SLC16A3	1	1	Carbohydrate Metabolism, Molecular Transport, Amino Acid Metabolism
4	BESD_IGT_vs_NGT_DirectDIA_MUSCLE_2 - 2024-01-05 12:37 PM	ACACA,NT5C1A	1	1	Developmental Disorder, Hereditary Disorder, Metabolic Disease
5	BESD_IGT_vs_NGT_DirectDIA_MUSCLE_2 - 2024-01-05 12:37 PM	GSTK1,RPTOR	1	1	Cell Cycle, Cellular Development, Cardiovascular System Development and Function
6	BESD_IGT_vs_NGT_DirectDIA_MUSCLE_2 - 2024-01-05 12:37 PM	AMPD1,YAP1	1	1	Hereditary Disorder, Metabolic Disease, Organismal Injury and Abnormalities
7	BESD_IGT_vs_NGT_DirectDIA_MUSCLE_2 - 2024-01-05 12:37 PM	HLA-A,IRF2BP2	1	1	Cell Death and Survival, Cell-To-Cell Signaling and Interaction, Cell-mediated Immune Response
8	BESD_IGT_vs_NGT_DirectDIA_MUSCLE_2 - 2024-01-05 12:37 PM	GADD45GIP1,LONP1	1	1	Cancer, Dental Disease, Developmental Disorder
9	BESD_IGT_vs_NGT_DirectDIA_MUSCLE_2 - 2024-01-05 12:37 PM	BPGM,MED13	1	1	Connective Tissue Disorders, Developmental Disorder, Hematological Disease
10	BESD_IGT_vs_NGT_DirectDIA_MUSCLE_2 - 2024-01-05 12:37 PM	MLIP,SUN2,SYNE1,TUBG1	1	1	Cellular Compromise, Cellular Function and Maintenance, Cellular Assembly and Organization
My Lists for My Projects->ZBM_CSI_BESD_FIN->BESD_IGT_vs_NGT_DirectDIA_MUSCLE_2 - 2024-01-05 12:37 PM
My Lists	-log(p-value)	Molecules
Tox Lists for My Projects->ZBM_CSI_BESD_FIN->BESD_IGT_vs_NGT_DirectDIA_MUSCLE_2 - 2024-01-05 12:37 PM
Ingenuity Toxicity Lists	-log(p-value)	Molecules
NRF2-mediated Oxidative Stress Response	4.5	0.0452	AKR7A2,GSTM1,RRAS2,GSR,NQO2,GSTM4,GSTK1,FTH1
Glutathione Depletion - Phase II Reactions	4.05	0.231	GSTM1,GSTM4,GSTK1
Aryl Hydrocarbon Receptor Signaling	3.54	0.0462	GSTM1,NQO2,GSTM4,GSTK1,NEDD8,HSPB3
Recovery from Ischemic Acute Renal Failure (Rat)	2.52	0.167	COL1A1,S100A4
LPS/IL-1 Mediated Inhibition of RXR Function	2.21	0.0299	XPO1,GSTM1,ACSF2,GSTM4,GSTK1
Protection from Hypoxia-induced Renal Ischemic Injury (Rat)	1.68	0.333	SLC2A1
Xenobiotic Metabolism Signaling	1.54	0.0203	GSTM1,RRAS2,NQO2,GSTM4,GSTK1
Glutathione Depletion - Hepatocellular Hypertrophy	1.46	0.2	GSR
Oxidative Stress	1.41	0.0444	GSTM1,GSR
FXR/RXR Activation	1.28	0.0248	GSTM1,GSTM4,GSTK1
Irreversible Glomerulonephritis Biomarker Panel (Rat)	1.26	0.125	COL1A1
Cardiac Fibrosis	1.25	0.0168	SGCG,NEXN,SLC2A1,PPP3CA,FUNDC2
Mitochondrial Dysfunction	1.22	0.0164	GSTM1,GSR,SDHD,GSTK1,PPP3CA
Primary Glomerulonephritis Biomarker Panel (Human)	1.22	0.111	COL1A1
Glutathione Depletion - CYP Induction and Reactive Metabolites	1.17	0.1	GSTM4
TR/RXR Activation	0.856	0.0213	SLC2A1,SLC16A3
Persistent Renal Ischemia-Reperfusion Injury (Mouse)	0.811	0.0417	COL1A1
Renal Necrosis/Cell Death	0.689	0.0105	YWHAQ,SDHD,SLC2A1,PPP3CA,ILK,F2
Decreases Depolarization of Mitochondria and Mitochondrial Membrane	0.675	0.0294	COL1A1
Liver Proliferation	0.614	0.0122	COL1A1,SLC2A1,F2
Increases Liver Hyperplasia/Hyperproliferation	0.564	0.0136	S100A6,FUNDC2
Cell Cycle: G2/M DNA Damage Checkpoint Regulation	0.545	0.0208	YWHAQ
PXR/RXR Activation	0.545	0.0208	GSTM1
Acute Renal Failure Panel (Rat)	0.509	0.0189	COL1A1
PPARα/RXRα Activation	0.489	0.012	RRAS2,ACAA1
Hypoxia-Inducible Factor Signaling	0.432	0.0152	EIF2S1
Cardiac Hypertrophy	0.389	0.00904	MLIP,S100A6,PPP3CA
Increases Cardiac Dysfunction	0.389	0.0133	SLC2A1
Fatty Acid Metabolism	0.384	0.0132	ACAA1
Increases Liver Damage	0.368	0.0125	F2
TGF-β Signaling	0.333	0.0112	RRAS2
Increases Liver Hepatitis	0.286	0.00962	CHCHD2
Hepatic Fibrosis	0.265	0.00769	COL1A1,PPP3CA
Increases Liver Steatosis	0.247	0.0084	PLIN2
NF-κB Signaling	0	0.00633	RRAS2
Hepatic Cholestasis	0	0.00617	PPP3CA
RAR Activation	0	0.00274	COL1A1
Increases Renal Proliferation	0	0.00645	SDHD
Cardiac Necrosis/Cell Death	0	0.0069	S100A6,PPP3CA
Increases Glomerular Injury	0	0.00658	ILK
My Pathways for My Projects->ZBM_CSI_BESD_FIN->BESD_IGT_vs_NGT_DirectDIA_MUSCLE_2 - 2024-01-05 12:37 PM
My Pathways	-log(p-value)	Molecules
Analysis Ready Molecules for My Projects->ZBM_CSI_BESD_FIN->BESD_IGT_vs_NGT_DirectDIA_MUSCLE_2 - 2024-01-05 12:37 PM
ID	Symbol	Expr Log Ratio	Expr p-value
P09110	ACAA1	-0.623734	1.14895e-12
Q96CM8	ACSF2	-0.718058	2.93689e-07
Q9NUB1	ACSS1	-1.11553	1.47761e-13
Q562R1	ACTBL2	-2.39203	1.17904e-08
O43488	AKR7A2	-0.586438	9.93057e-12
P13716	ALAD	-0.854561	8.86616e-10
P23109	AMPD1	0.60478	4.94637e-09
O15382	BCAT2	-0.766773	1.76648e-11
P07738	BPGM	-1.18517	2.57042e-13
O43852	CALU	-1.19166	4.37519e-12
Q01518	CAP1	-0.928617	2.20712e-11
P40227	CCT6A	-0.840564	1.10361e-14
Q9Y6H1	CHCHD2	-0.771851	2.0386e-15
P02452	COL1A1	-0.6595	0.0159443
Q14894	CRYM	-1.85506	1.74798e-07
Q9NTM9	CUTC	-1.60633	3.36716e-23
P14868	DARS1	-0.641842	1.1698e-11
P11182	DBT	-0.700583	1.53523e-11
Q14203	DCTN1	-0.915009	3.98125e-14
O00571	DDX3X	-0.727529	6.62645e-15
P05198	EIF2S1	-1.01682	7.03744e-16
P23588	EIF4B	-0.641015	2.65736e-15
P00734	F2	-0.619598	1.79172e-05
Q9NSD9	FARSB	-0.795568	4.43958e-09
P02794	FTH1	0.815184	0.00972757
Q9BWH2	FUNDC2	-0.790525	5.50901e-12
Q12849	GRSF1	-0.609417	1.21844e-13
P00390	GSR	-0.804096	5.88706e-15
Q9Y2Q3	GSTK1	-0.658738	3.73165e-11
P09488	GSTM1	0.730225	0.000455274
Q03013	GSTM4	1.96065	0.000135356
P07305	H1-0	-1.62231	2.9476e-18
Q9H0R4	HDHD2	-0.671701	3.25448e-14
P04439	HLA-A	-0.954775	8.24835e-14
P08397	HMBS	-1.05204	1.88007e-11
P07910	HNRNPC	-1.56321	5.71498e-11
Q53GQ0	HSD17B12	-0.876914	1.81736e-12
Q12988	HSPB3	-1.61263	1.56471e-10
Q2TAA2	IAH1	-0.637355	5.44591e-15
Q13418	ILK	-0.715316	1.92319e-08
Q9UPQ0	LIMCH1	-0.665411	1.99355e-07
P36776	LONP1	-1.53972	2.38327e-20
Q9BV79	MECR	-0.751566	1.24241e-13
Q5VWP3	MLIP	-0.727149	1.87553e-13
Q9HD33	MRPL47	-1.00156	1.68686e-13
Q13203	MYBPH	-1.13264	0.000155169
Q15843	NEDD8	-0.797796	2.06289e-10
Q0ZGT2	NEXN	-0.783416	7.34792e-12
P16083	NQO2	-1.53048	6.24084e-08
Q9BXI3	NT5C1A	-0.722888	3.10367e-09
P68402	PAFAH1B2	-0.832057	1.3413e-13
Q9NVE7	PANK4	-0.796306	1.26417e-12
Q5JRX3	PITRM1	-0.653113	1.03239e-06
Q99541	PLIN2	0.743555	0.00078573
Q9NVS9	PNPO	-1.14003	6.03051e-13
Q16821	PPP1R3A	-1.04672	1.40391e-17
Q08209	PPP3CA	-0.749363	2.33646e-15
O75569	PRKRA	-0.762787	7.19961e-10
Q9BRX8	PRXL2A	-0.645277	7.02082e-06
P25787	PSMA2	-0.629176	4.27698e-09
P20618	PSMB1	-0.676126	1.14583e-15
P62191	PSMC1	-0.794952	3.01788e-12
O00231	PSMD11	-0.601934	4.15635e-11
Q15008	PSMD6	-0.87937	1.57498e-13
Q9UL46	PSME2	-0.642087	1.94929e-08
P20472	PVALB	-1.06876	0.0102569
Q5XPI4	RNF123	-0.873324	2.84593e-14
P26373	RPL13	-0.878986	3.09027e-12
P46776	RPL27A	-0.994617	1.59111e-16
P62910	RPL32	-1.62509	5.14329e-11
P04844	RPN2	-0.812378	1.71148e-11
P62263	RPS14	-0.816142	4.27698e-09
P62841	RPS15	-0.701541	4.06476e-09
P62847	RPS24	-0.647468	3.25448e-14
P62070	RRAS2	-0.7966	4.39745e-13
P26447	S100A4	-0.810104	1.49642e-06
P06703	S100A6	-0.912559	2.9452e-08
Q9Y3A5	SBDS	-0.784827	4.46967e-15
O14521	SDHD	-0.704551	1.68121e-16
Q13326	SGCG	-0.766364	3.02754e-09
O15427	SLC16A3	-1.13157	4.19304e-12
P11166	SLC2A1	-0.781245	1.17598e-05
Q9UHP9	SMPX	-0.706211	2.04421e-14
Q13884	SNTB1	-0.595489	4.36551e-07
P02549	SPTA1	-0.628099	0.000344182
P27105	STOM	-0.680661	1.73789e-05
P17987	TCP1	-0.691414	3.25194e-12
Q3ZCQ8	TIMM50	-0.990042	2.9476e-18
Q9GZM7	TINAGL1	0.734717	8.43928e-05
Q6UW68	TMEM205	-0.757303	1.45144e-16
P23381	WARS1	-0.67234	4.16417e-13
A4UGR9	XIRP2	-0.656635	0.00160625
O14980	XPO1	-0.955808	3.87637e-19
P27348	YWHAQ	-0.632211	1.03102e-08

## Sheet: Table_S9_HpH_STRING
HpH/DDA-H
Comparison (group1/group2)	Group	ProteinGroups	AVG Log2 Ratio	Absolute AVG Log2 Ratio	Pvalue	Qvalue	# of Ratios	UniProtIds	Genes	ProteinDescriptions	ProteinNames	# Unique Total Peptides	% Change	Ratio	Condition Numerator	Condition Denominator	GO Cellular Component	GO Molecular Function	GO Biological Process
IGT_COMB / NG_COMB	O14521	O14521	-0.646123	0.646123	3.0519e-12	2.96329e-11	96	O14521	SDHD	Succinate dehydrogenase [ubiquinone] cytochrome b small subunit, mitochondrial	DHSD_HUMAN	2	-36.1005	0.638995	IGT_COMB	NG_COMB	mitochondrion,mitochondrial envelope,mitochondrial inner membrane,mitochondrial respiratory chain complex II, succinate dehydrogenase complex (ubiquinone),integral component of membrane	succinate dehydrogenase activity,electron carrier activity,heme binding,metal ion binding,ubiquinone binding,succinate dehydrogenase (ubiquinone) activity	tricarboxylic acid cycle,mitochondrial electron transport, succinate to ubiquinone
IGT_COMB / NG_COMB	O14744	O14744	-0.785941	0.785941	9.35305e-16	5.11867e-14	96	O14744	PRMT5	Protein arginine N-methyltransferase 5	ANM5_HUMAN	10	-42.0026	0.579974	IGT_COMB	NG_COMB	nucleus,nucleoplasm,cytoplasm,Golgi apparatus,cytosol,methylosome,histone methyltransferase complex	core promoter sequence-specific DNA binding,transcription corepressor activity,protein binding,methyltransferase activity,methyl-CpG binding,histone-arginine N-methyltransferase activity,protein-arginine N-methyltransferase activity,protein-arginine omega-N symmetric methyltransferase activity,identical protein binding,ribonucleoprotein complex binding,histone methyltransferase activity (H4-R3 sp…	spliceosomal snRNP assembly,DNA-templated transcription, termination,regulation of transcription, DNA-templated,regulation of mitotic nuclear division,cell proliferation,peptidyl-arginine methylation,peptidyl-arginine methylation, to symmetrical-dimethyl arginine,circadian regulation of gene expression,peptidyl-arginine N-methylation,endothelial cell activation,histone H4-R3 methylation,regulatio…
IGT_COMB / NG_COMB	O14841	O14841	-2.33315	2.33315	6.01764e-09	2.27838e-08	96	O14841	OPLAH	5-oxoprolinase	OPLA_HUMAN	9	-80.155	0.19845	IGT_COMB	NG_COMB	cytosol	ATP binding,5-oxoprolinase (ATP-hydrolyzing) activity	glutathione metabolic process,glutathione biosynthetic process
IGT_COMB / NG_COMB	O15173	O15173	-0.812736	0.812736	6.31006e-10	3.11365e-09	96	O15173	PGRMC2	Membrane-associated progesterone receptor component 2	PGRC2_HUMAN	5	-43.0699	0.569301	IGT_COMB	NG_COMB	nuclear envelope,membrane,integral component of membrane,endomembrane system	steroid hormone receptor activity,steroid binding,protein binding,heme binding	steroid hormone mediated signaling pathway
IGT_COMB / NG_COMB	O43826	O43826	-0.680525	0.680525	9.30501e-06	1.7505e-05	96	O43826	SLC37A4	Glucose-6-phosphate exchanger SLC37A4	G6PT1_HUMAN	4	-37.6062	0.623938	IGT_COMB	NG_COMB	endoplasmic reticulum,endoplasmic reticulum membrane,membrane,integral component of membrane,integral component of endoplasmic reticulum membrane	transporter activity,glucose-6-phosphate transmembrane transporter activity,glucose 6-phosphate:inorganic phosphate antiporter activity	glucose metabolic process,gluconeogenesis,carbohydrate transport,glucose-6-phosphate transport,phosphate ion transmembrane transport
IGT_COMB / NG_COMB	O43852	O43852	-1.09856	1.09856	6.57148e-11	4.03677e-10	96	O43852	CALU	Calumenin	CALU_HUMAN	10	-53.3018	0.466982	IGT_COMB	NG_COMB	extracellular region,endoplasmic reticulum,endoplasmic reticulum lumen,endoplasmic reticulum membrane,Golgi apparatus,membrane,sarcoplasmic reticulum lumen,melanosome	calcium ion binding,protein binding	biological_process,post-translational protein modification,cellular protein metabolic process
IGT_COMB / NG_COMB	O60493	O60493	-0.709016	0.709016	2.13972e-12	2.3002e-11	96	O60493	SNX3	Sorting nexin-3	SNX3_HUMAN	6	-38.8263	0.611737	IGT_COMB	NG_COMB	cytoplasm,early endosome,cytosol,endosome membrane,extrinsic component of membrane,clathrin-coated vesicle,early endosome membrane,early phagosome,extracellular exosome,retromer complex	protein binding,phosphatidylinositol-5-phosphate binding,protein phosphatase binding,phosphatidylinositol-3-phosphate binding,phosphatidylinositol-4-phosphate binding,phosphatidylinositol-3,5-bisphosphate binding	response to bacterium,membrane invagination,positive regulation of neuron projection development,protein transport,Wnt signaling pathway,protein deubiquitination,protein to membrane docking,regulation of Wnt signaling pathway,negative regulation of protein catabolic process,negative regulation of viral entry into host cell,negative regulation of phagocytosis,negative regulation of protein transpo…
IGT_COMB / NG_COMB	O60506	O60506	-0.626372	0.626372	4.00666e-09	1.55614e-08	96	O60506	SYNCRIP	Heterogeneous nuclear ribonucleoprotein Q	HNRPQ_HUMAN	13	-35.2196	0.647804	IGT_COMB	NG_COMB	nucleus,nucleoplasm,endoplasmic reticulum,membrane,intracellular ribonucleoprotein complex,CRD-mediated mRNA stability complex,catalytic step 2 spliceosome,histone pre-mRNA 3'end processing complex,GAIT complex	RNA binding,protein binding,poly(A) binding	mRNA splicing, via spliceosome,osteoblast differentiation,RNA processing,RNA splicing,viral process,negative regulation of translation,CRD-mediated mRNA stabilization,cellular response to interferon-gamma
IGT_COMB / NG_COMB	O60814;P57053;P58876;P62807;Q5QNW6;Q93079;Q99877;Q99879;Q99880	O60814;P57053;P58876;P62807;Q5QNW6;Q93079;Q99877;Q99879;Q99880	-0.652827	0.652827	2.49107e-08	8.15014e-08	96	O60814;P57053;P58876;P62807;Q5QNW6;Q93079;Q99877;Q99879;Q99880	H2BC12;H2BS1;H2BC5;H2BC10;H2BC18;H2BC9;H2BC15;H2BC14;H2BC13	Histone H2B type 1-K;Histone H2B type F-S;Histone H2B type 1-D;Histone H2B type 1-C/E/F/G/I;Histone H2B type 2-F;Histone H2B type 1-H;Histone H2B type 1-N;Histone H2B type 1-M;Histone H2B type 1-L	H2B1K_HUMAN;H2BFS_HUMAN;H2B1D_HUMAN;H2B1C_HUMAN;H2B2F_HUMAN;H2B1H_HUMAN;H2B1N_HUMAN;H2B1M_HUMAN;H2B1L_HUMAN	2	-36.3967	0.636033	IGT_COMB	NG_COMB	nucleosome,extracellular space,nucleus,nucleoplasm,cytosol;nucleosome,extracellular space,nucleus,nucleoplasm,cytosol;nucleosome,nucleus,nucleoplasm,cytosol,extracellular exosome;nucleosome,extracellular space,nucleus,nucleoplasm,cytosol,extracellular exosome;nucleosome,nucleus,nucleoplasm,cytosol,extracellular exosome;nucleosome,nucleus,nucleoplasm,cytosol,macromolecular complex,extracellular ex…	molecular_function,DNA binding,protein heterodimerization activity;DNA binding,protein heterodimerization activity;molecular_function,DNA binding,protein heterodimerization activity;DNA binding,protein binding,identical protein binding,protein heterodimerization activity;molecular_function,DNA binding,protein heterodimerization activity;DNA binding,protein binding,enzyme binding,ubiquitin-like pr…	innate immune response in mucosa,nucleosome assembly,protein ubiquitination,antibacterial humoral response,killing of cells of other organism,defense response to Gram-negative bacterium,defense response to Gram-positive bacterium,Requires Ontology;innate immune response in mucosa,nucleosome assembly,antibacterial humoral response,substantia nigra development,defense response to Gram-positive bact…
IGT_COMB / NG_COMB	O60869	O60869	-0.694477	0.694477	1.05367e-13	1.71435e-12	96	O60869	EDF1	Endothelial differentiation-related factor 1	EDF1_HUMAN	4	-38.2067	0.617933	IGT_COMB	NG_COMB	intracellular,nucleus,nucleolus,cytoplasm,cytosol,extracellular exosome,transcription factor TFIID complex	transcription coactivator activity,RNA binding,protein binding,calmodulin binding,sequence-specific DNA binding,transcription factor activity, sequence-specific DNA binding,histone acetyltransferase activity,methyltransferase activity	transcription, DNA-templated,regulation of transcription, DNA-templated,multicellular organism development,regulation of lipid metabolic process,positive regulation of DNA binding,endothelial cell differentiation,positive regulation of transcription, DNA-templated
IGT_COMB / NG_COMB	O75131	O75131	-0.795472	0.795472	2.90389e-12	2.96295e-11	96	O75131	CPNE3	Copine-3	CPNE3_HUMAN	6	-42.3846	0.576154	IGT_COMB	NG_COMB	nucleus,nucleolus,cytoplasm,mitochondrion,cytosol,plasma membrane,focal adhesion,cell junction,azurophil granule membrane,extracellular exosome	RNA binding,protein serine/threonine kinase activity,transporter activity,protein binding,calcium-dependent phospholipid binding,receptor tyrosine kinase binding,calcium-dependent protein binding	protein phosphorylation,lipid metabolic process,vesicle-mediated transport,positive regulation of cell migration,ERBB2 signaling pathway,neutrophil degranulation,glycerophospholipid biosynthetic process,cellular response to calcium ion,cellular response to growth factor stimulus
IGT_COMB / NG_COMB	O75396	O75396	-1.21899	1.21899	5.3671e-13	6.87445e-12	96	O75396	SEC22B	Vesicle-trafficking protein SEC22b	SC22B_HUMAN	5	-57.0417	0.429583	IGT_COMB	NG_COMB	Golgi membrane,endoplasmic reticulum membrane,endoplasmic reticulum-Golgi intermediate compartment,ER to Golgi transport vesicle membrane,integral component of membrane,transport vesicle,phagocytic vesicle membrane,SNARE complex,endoplasmic reticulum-Golgi intermediate compartment membrane,melanosome	SNARE binding,SNAP receptor activity,protein binding,syntaxin binding	antigen processing and presentation of exogenous peptide antigen via MHC class I, TAP-dependent,ER to Golgi vesicle-mediated transport,retrograde vesicle-mediated transport, Golgi to ER,protein transport,positive regulation of protein catabolic process,COPII vesicle coating,vesicle fusion with Golgi apparatus,negative regulation of autophagosome assembly,vesicle fusion with endoplasmic reticulum-…
IGT_COMB / NG_COMB	O75822	O75822	-1.34651	1.34651	2.06705e-09	8.76312e-09	96	O75822	EIF3J	Eukaryotic translation initiation factor 3 subunit J	EIF3J_HUMAN	7	-60.6759	0.393241	IGT_COMB	NG_COMB	cytosol,eukaryotic translation initiation factor 3 complex	translation initiation factor activity,protein binding	translational initiation
IGT_COMB / NG_COMB	O94903	O94903	-0.641825	0.641825	6.38341e-15	1.74673e-13	96	O94903	PLPBP	Pyridoxal phosphate homeostasis protein	PLPHP_HUMAN	6	-35.9098	0.640902	IGT_COMB	NG_COMB	intracellular,cytoplasm,mitochondrion,extracellular exosome	pyridoxal phosphate binding	biological_process
IGT_COMB / NG_COMB	P02538;P48668	P02538;P48668	-0.73971	0.73971	0.041794	0.0340339	96	P02538;P48668	KRT6A;KRT6C	Keratin, type II cytoskeletal 6A;Keratin, type II cytoskeletal 6C	K2C6A_HUMAN;K2C6C_HUMAN	11	-40.114	0.59886	IGT_COMB	NG_COMB	nucleus,cytosol,membrane,keratin filament,extracellular exosome;cytosol,intermediate filament,keratin filament,extracellular exosome	structural constituent of cytoskeleton,protein binding;structural molecule activity,protein binding	negative regulation of cytolysis by symbiont of host cells,morphogenesis of an epithelium,cytoskeleton organization,positive regulation of cell proliferation,cell differentiation,keratinization,wound healing,defense response to Gram-positive bacterium,cytolysis in other organism involved in symbiotic interaction,Requires Ontology,cornification,negative regulation of entry of bacterium into host c…
IGT_COMB / NG_COMB	P02753	P02753	-2.95891	2.95891	2.23816e-09	9.42219e-09	96	P02753	RBP4	Retinol-binding protein 4	RET4_HUMAN	5	-87.1389	0.128611	IGT_COMB	NG_COMB	extracellular region,extracellular space,cytosol,extracellular exosome	protein binding,retinal binding,retinol binding,retinol transporter activity,protein heterodimerization activity	retinoid metabolic process,eye development,gluconeogenesis,heart development,visual perception,maintenance of gastrointestinal epithelium,lung development,positive regulation of insulin secretion,response to retinoic acid,retinol transport,retinol metabolic process,glucose homeostasis,response to ethanol,embryonic organ morphogenesis,embryonic skeletal system development,cardiac muscle tissue dev…
IGT_COMB / NG_COMB	P04083	P04083	-1.00952	1.00952	1.47207e-05	2.65326e-05	96	P04083	ANXA1	Annexin A1	ANXA1_HUMAN	11	-50.3288	0.496712	IGT_COMB	NG_COMB	cornified envelope,phagocytic cup,extracellular region,extracellular space,nucleus,nucleoplasm,cytoplasm,endosome,cytosol,plasma membrane,cell-cell adherens junction,focal adhesion,cell surface,basolateral plasma membrane,apical plasma membrane,lateral plasma membrane,extrinsic component of membrane,cytoplasmic vesicle membrane,extrinsic component of external side of plasma membrane,extrinsic com…	single-stranded DNA binding,single-stranded RNA binding,helicase activity,receptor binding,structural molecule activity,calcium ion binding,protein binding,phospholipid binding,calcium-dependent phospholipid binding,phospholipase A2 inhibitor activity,protein binding, bridging,double-stranded DNA-dependent ATPase activity,annealing helicase activity,protein homodimerization activity,calcium-depen…	DNA strand renaturation,neutrophil homeostasis,adaptive immune response,monocyte chemotaxis,regulation of leukocyte migration,phagocytosis,inflammatory response,signal transduction,cell surface receptor signaling pathway,G-protein coupled receptor signaling pathway,G-protein coupled receptor signaling pathway, coupled to cyclic nucleotide second messenger,regulation of cell shape,response to X-ra…
IGT_COMB / NG_COMB	P05166	P05166	-0.592787	0.592787	2.59316e-08	8.39292e-08	96	P05166	PCCB	Propionyl-CoA carboxylase beta chain, mitochondrial	PCCB_HUMAN	12	-33.6939	0.663061	IGT_COMB	NG_COMB	mitochondrion,mitochondrial matrix,cytosol	propionyl-CoA carboxylase activity,protein binding,ATP binding,CoA carboxylase activity	biotin metabolic process,fatty acid catabolic process,short-chain fatty acid catabolic process
IGT_COMB / NG_COMB	P05204	P05204	-0.669685	0.669685	6.75427e-06	1.30323e-05	96	P05204	HMGN2	Non-histone chromosomal protein HMG-17	HMGN2_HUMAN	2	-37.1356	0.628644	IGT_COMB	NG_COMB	chromatin,extracellular space,nucleus,cytoplasm	RNA binding,protein binding,nucleosomal DNA binding	killing of cells of other organism,Requires Ontology
IGT_COMB / NG_COMB	P06748	P06748	-0.6543	0.6543	1.92389e-07	5.05756e-07	96	P06748	NPM1	Nucleophosmin	NPM_HUMAN	5	-36.4616	0.635384	IGT_COMB	NG_COMB	nucleus,nucleoplasm,nucleolus,cytoplasm,centrosome,cytosol,focal adhesion,membrane,intracellular ribonucleoprotein complex,spindle pole centrosome,macromolecular complex,protein-DNA complex	core promoter binding,RNA polymerase II transcription coactivator activity,transcription coactivator activity,RNA binding,protein kinase inhibitor activity,protein binding,transcription factor binding,protein kinase binding,Tat protein binding,activating transcription factor binding,histone binding,protein homodimerization activity,ribosomal large subunit binding,ribosomal small subunit binding,p…	DNA repair,nucleosome assembly,regulation of transcription from RNA polymerase II promoter,transcription from RNA polymerase II promoter,intracellular protein transport,nucleocytoplasmic transport,DNA damage response, signal transduction by p53 class mediator resulting in cell cycle arrest,centrosome cycle,signal transduction,cell aging,protein localization,positive regulation of cell proliferati…
IGT_COMB / NG_COMB	P07910	P07910	-1.56763	1.56763	1.0968e-11	8.57502e-11	96	P07910	HNRNPC	Heterogeneous nuclear ribonucleoproteins C1/C2	HNRPC_HUMAN	6	-66.2639	0.337361	IGT_COMB	NG_COMB	nuclear chromatin,extracellular region,nucleus,nucleoplasm,spliceosomal complex,cytosol,actin cytoskeleton,membrane,macromolecular complex,extracellular exosome,catalytic step 2 spliceosome,telomerase holoenzyme complex	RNA polymerase II core promoter proximal region sequence-specific DNA binding,RNA polymerase II distal enhancer sequence-specific DNA binding,RNA binding,mRNA 3'-UTR binding,protein binding,poly(U) RNA binding,nucleosomal DNA binding,identical protein binding,telomerase RNA binding,N6-methyladenosine-containing RNA binding,poly(A) RNA binding	mRNA splicing, via spliceosome,osteoblast differentiation,RNA splicing,RNA metabolic process,negative regulation of telomere maintenance via telomerase,ATP-dependent chromatin remodeling,3'-UTR-mediated mRNA stabilization
IGT_COMB / NG_COMB	P08123	P08123	-0.929782	0.929782	0.000236207	0.000345137	96	P08123	COL1A2	Collagen alpha-2(I) chain	CO1A2_HUMAN	4	-47.5062	0.524938	IGT_COMB	NG_COMB	extracellular region,collagen type I trimer,extracellular space,endoplasmic reticulum,endoplasmic reticulum lumen,extracellular matrix,extracellular exosome	protease binding,extracellular matrix structural constituent,protein binding,protein binding, bridging,identical protein binding,SMAD binding,metal ion binding,platelet-derived growth factor binding	skeletal system development,blood vessel development,transforming growth factor beta receptor signaling pathway,Rho protein signal transduction,blood coagulation,regulation of blood pressure,cytokine-mediated signaling pathway,platelet activation,extracellular matrix organization,collagen fibril organization,collagen catabolic process,odontogenesis,skin morphogenesis,regulation of immune response…
IGT_COMB / NG_COMB	P09525	P09525	-0.611244	0.611244	5.10008e-08	1.55063e-07	96	P09525	ANXA4	Annexin A4	ANXA4_HUMAN	10	-34.5368	0.654632	IGT_COMB	NG_COMB	nucleus,cytoplasm,plasma membrane,cell surface,vesicle membrane,nuclear membrane,perinuclear region of cytoplasm,extracellular exosome	phospholipase inhibitor activity,calcium ion binding,protein binding,calcium-dependent phospholipid binding,identical protein binding,calcium-dependent protein binding,NF-kappaB binding	regulation of transcription from RNA polymerase II promoter,signal transduction,Notch signaling pathway,epithelial cell differentiation,negative regulation of NF-kappaB transcription factor activity,negative regulation of apoptotic process,negative regulation of catalytic activity,negative regulation of interleukin-8 secretion
IGT_COMB / NG_COMB	P0C0L4	P0C0L4	0.68413	0.68413	2.71127e-06	5.62822e-06	96	P0C0L4	C4A	Complement C4-A	CO4A_HUMAN	37	60.6733	1.60673	IGT_COMB	NG_COMB	extracellular region,extracellular space,endoplasmic reticulum lumen,plasma membrane,cell junction,axon,dendrite,neuronal cell body,synapse,extracellular exosome,blood microparticle	complement component C1q binding,serine-type endopeptidase activity,endopeptidase inhibitor activity	proteolysis,inflammatory response,complement activation,complement activation, classical pathway,negative regulation of endopeptidase activity,regulation of complement activation,post-translational protein modification,cellular protein metabolic process,innate immune response,positive regulation of apoptotic cell clearance
IGT_COMB / NG_COMB	P12277	P12277	-0.640441	0.640441	1.40531e-08	4.89014e-08	96	P12277	CKB	Creatine kinase B-type	KCRB_HUMAN	19	-35.8483	0.641517	IGT_COMB	NG_COMB	extracellular space,nucleus,mitochondrion,cytosol,dendrite,neuronal cell body,myelin sheath,extracellular exosome	creatine kinase activity,protein binding,ATP binding,ubiquitin protein ligase binding	creatine metabolic process,phosphorylation,cerebellum development,substantia nigra development,cellular chloride ion homeostasis
IGT_COMB / NG_COMB	P12814	P12814	-0.840931	0.840931	6.28684e-09	2.35258e-08	96	P12814	ACTN1	Alpha-actinin-1	ACTN1_HUMAN	9	-44.1717	0.558283	IGT_COMB	NG_COMB	stress fiber,ruffle,extracellular region,extracellular space,intracellular,cytoplasm,cytosol,plasma membrane,brush border,cell-cell junction,fascia adherens,focal adhesion,Z disc,platelet alpha granule lumen,pseudopodium,cell projection,extracellular exosome,actin filament	double-stranded RNA binding,integrin binding,calcium ion binding,protein binding,vinculin binding,ligand-dependent nuclear receptor transcription coactivator activity,protein homodimerization activity,ion channel binding,actin filament binding	platelet degranulation,actin filament organization,platelet formation,platelet morphogenesis,regulation of apoptotic process,focal adhesion assembly,actin filament bundle assembly,negative regulation of cellular component movement,actin filament network formation,actin crosslink formation,regulation of nucleic acid-templated transcription,platelet activation,platelet aggregation
IGT_COMB / NG_COMB	P12955	P12955	-1.04828	1.04828	5.17113e-08	1.55971e-07	96	P12955	PEPD	Xaa-Pro dipeptidase	PEPD_HUMAN	5	-51.6457	0.483543	IGT_COMB	NG_COMB	nucleus,nucleoplasm,extracellular exosome	aminopeptidase activity,metallocarboxypeptidase activity,protein binding,manganese ion binding,proline dipeptidase activity	proteolysis,cellular amino acid metabolic process,collagen catabolic process
IGT_COMB / NG_COMB	P13987	P13987	-0.613414	0.613414	8.29778e-17	7.13609e-15	96	P13987	CD59	CD59 glycoprotein	CD59_HUMAN	3	-34.6352	0.653648	IGT_COMB	NG_COMB	Golgi membrane,extracellular space,endoplasmic reticulum membrane,plasma membrane,focal adhesion,cell surface,ER to Golgi transport vesicle membrane,membrane,transport vesicle,anchored component of external side of plasma membrane,vesicle,endoplasmic reticulum-Golgi intermediate compartment membrane,specific granule membrane,extracellular exosome,tertiary granule membrane	complement binding,protein binding	cell activation,negative regulation of activation of membrane attack complex,ER to Golgi vesicle-mediated transport,cell surface receptor signaling pathway,blood coagulation,regulation of complement activation,neutrophil degranulation,COPII vesicle coating
IGT_COMB / NG_COMB	P14314	P14314	-0.698848	0.698848	1.20522e-11	8.74145e-11	96	P14314	PRKCSH	Glucosidase 2 subunit beta	GLU2B_HUMAN	6	-38.3936	0.616064	IGT_COMB	NG_COMB	intracellular,endoplasmic reticulum,endoplasmic reticulum lumen	protein kinase C binding,calcium ion binding,ion channel binding,phosphoprotein binding	protein folding,N-glycan processing,intracellular signal transduction,post-translational protein modification,cellular protein metabolic process
IGT_COMB / NG_COMB	P14625	P14625	-0.901168	0.901168	1.202e-11	8.74145e-11	96	P14625	HSP90B1	Endoplasmin	ENPL_HUMAN	13	-46.4547	0.535453	IGT_COMB	NG_COMB	extracellular region,nucleus,endoplasmic reticulum,endoplasmic reticulum lumen,endoplasmic reticulum membrane,cytosol,plasma membrane,focal adhesion,membrane,midbody,extracellular matrix,macromolecular complex,endoplasmic reticulum chaperone complex,melanosome,perinuclear region of cytoplasm,extracellular exosome,endocytic vesicle lumen	RNA binding,calcium ion binding,protein binding,ATP binding,protein phosphatase binding,low-density lipoprotein particle receptor binding,unfolded protein binding	response to hypoxia,toll-like receptor signaling pathway,receptor-mediated endocytosis,protein transport,cytokine-mediated signaling pathway,ER-associated ubiquitin-dependent protein catabolic process,retrograde protein transport, ER to cytosol,actin rod assembly,protein folding in endoplasmic reticulum,response to endoplasmic reticulum stress,ATF6-mediated unfolded protein response,negative regu…
IGT_COMB / NG_COMB	P19823	P19823	-0.784874	0.784874	3.12221e-08	9.84067e-08	96	P19823	ITIH2	Inter-alpha-trypsin inhibitor heavy chain H2	ITIH2_HUMAN	12	-41.9597	0.580403	IGT_COMB	NG_COMB	extracellular region,endoplasmic reticulum lumen,extracellular exosome,blood microparticle	endopeptidase inhibitor activity,serine-type endopeptidase inhibitor activity	negative regulation of endopeptidase activity,hyaluronan metabolic process,post-translational protein modification,cellular protein metabolic process
IGT_COMB / NG_COMB	P22059	P22059	-0.731515	0.731515	3.41328e-12	3.21062e-11	96	P22059	OSBP	Oxysterol-binding protein 1	OSBP1_HUMAN	5	-39.7729	0.602271	IGT_COMB	NG_COMB	Golgi membrane,nucleus,nucleoplasm,nucleolus,cytoplasm,endoplasmic reticulum membrane,Golgi apparatus,cytosol,membrane,cell junction,perinuclear region of cytoplasm	protein binding,oxysterol binding,sterol transporter activity,protein domain specific binding,phosphatidylinositol-4-phosphate binding	bile acid biosynthetic process,sterol transport,positive regulation of growth of symbiont in host
IGT_COMB / NG_COMB	P22102	P22102	-0.645774	0.645774	0.00192059	0.00228046	96	P22102	GART	Trifunctional purine biosynthetic protein adenosine-3	PUR2_HUMAN	8	-36.085	0.63915	IGT_COMB	NG_COMB	cytosol,extracellular exosome	phosphoribosylamine-glycine ligase activity,phosphoribosylformylglycinamidine cyclo-ligase activity,phosphoribosylglycinamide formyltransferase activity,ATP binding,metal ion binding	brainstem development,'de novo' IMP biosynthetic process,glycine metabolic process,purine nucleobase biosynthetic process,purine ribonucleoside monophosphate biosynthetic process,response to organic substance,response to inorganic substance,cerebellum development,cerebral cortex development,tetrahydrofolate biosynthetic process
IGT_COMB / NG_COMB	P22352	P22352	-0.937511	0.937511	4.06131e-11	2.68671e-10	96	P22352	GPX3	Glutathione peroxidase 3	GPX3_HUMAN	4	-47.7867	0.522133	IGT_COMB	NG_COMB	extracellular region,extracellular space,extracellular exosome	glutathione peroxidase activity,protein binding,transcription factor binding,selenium binding	response to lipid hydroperoxide,cellular response to oxidative stress,hydrogen peroxide catabolic process,protein homotetramerization,oxidation-reduction process,cellular oxidant detoxification
IGT_COMB / NG_COMB	P24844	P24844	-0.788829	0.788829	7.2961e-06	1.39437e-05	96	P24844	MYL9	Myosin regulatory light polypeptide 9	MYL9_HUMAN	2	-42.1186	0.578814	IGT_COMB	NG_COMB	cytosol,muscle myosin complex	calcium ion binding,structural constituent of muscle	muscle contraction,regulation of muscle contraction,regulation of megakaryocyte differentiation,platelet aggregation
IGT_COMB / NG_COMB	P26038	P26038	-0.657365	0.657365	1.96207e-11	1.38961e-10	96	P26038	MSN	Moesin	MOES_HUMAN	14	-36.5965	0.634035	IGT_COMB	NG_COMB	uropod,extracellular space,nucleus,cytoplasm,cytosol,cytoskeleton,plasma membrane,microvillus,focal adhesion,cell surface,basolateral plasma membrane,apical plasma membrane,filopodium,pseudopodium,microvillus membrane,vesicle,myelin sheath,apical part of cell,perinuclear region of cytoplasm,extracellular exosome,invadopodium,cell periphery,blood microparticle	double-stranded RNA binding,actin binding,receptor binding,structural constituent of cytoskeleton,protein binding,enzyme binding,protein kinase binding,cell adhesion molecule binding	immunological synapse formation,cytoskeleton organization,leukocyte cell-cell adhesion,regulation of cell shape,regulation of cell size,positive regulation of gene expression,gland morphogenesis,membrane to membrane docking,interleukin-12-mediated signaling pathway,T cell proliferation,establishment of epithelial cell apical/basal polarity,leukocyte migration,establishment of endothelial barrier,…
IGT_COMB / NG_COMB	P27695	P27695	-0.88794	0.88794	2.73997e-12	2.8439e-11	96	P27695	APEX1	DNA-(apurinic or apyrimidinic site) endonuclease	APEX1_HUMAN	4	-45.9615	0.540385	IGT_COMB	NG_COMB	nuclear chromosome, telomeric region,nucleus,nucleoplasm,transcription factor complex,nucleolus,cytoplasm,mitochondrion,endoplasmic reticulum,centrosome,ribosome,nuclear speck,perinuclear region of cytoplasm	DNA binding,damaged DNA binding,double-stranded telomeric DNA binding,transcription coactivator activity,transcription corepressor activity,RNA binding,DNA-(apurinic or apyrimidinic site) lyase activity,endonuclease activity,endodeoxyribonuclease activity,RNA-DNA hybrid ribonuclease activity,phosphodiesterase I activity,uracil DNA N-glycosylase activity,protein binding,phosphoric diester hydrolas…	telomere maintenance,DNA repair,base-excision repair,base-excision repair, base-free sugar-phosphate removal,DNA recombination,transcription, DNA-templated,regulation of transcription, DNA-templated,aging,negative regulation of smooth muscle cell migration,regulation of apoptotic process,regulation of mRNA stability,cell redox homeostasis,oxidation-reduction process,cellular response to hydrogen …
IGT_COMB / NG_COMB	P28482	P28482	-1.17358	1.17358	1.56866e-15	6.74523e-14	96	P28482	MAPK1	Mitogen-activated protein kinase 1	MK01_HUMAN	6	-55.668	0.44332	IGT_COMB	NG_COMB	extracellular region,nucleus,nucleoplasm,cytoplasm,mitochondrion,early endosome,late endosome,Golgi apparatus,microtubule organizing center,cytosol,cytoskeleton,plasma membrane,caveola,focal adhesion,axon,pseudopodium,dendrite cytoplasm,azurophil granule lumen,perikaryon,extracellular exosome,mitotic spindle,ficolin-1-rich granule lumen	phosphotyrosine binding,DNA binding,protein serine/threonine kinase activity,MAP kinase activity,MAP kinase kinase activity,protein binding,ATP binding,transcription factor binding,RNA polymerase II carboxy-terminal domain kinase activity,kinase activity,phosphatase binding,mitogen-activated protein kinase kinase kinase binding,identical protein binding	MAPK cascade,activation of MAPK activity,transcription, DNA-templated,protein phosphorylation,apoptotic process,chemotaxis,cellular response to DNA damage stimulus,cell cycle,signal transduction,chemical synaptic transmission,axon guidance,learning or memory,positive regulation of cell proliferation,fibroblast growth factor receptor signaling pathway,positive regulation of gene expression,positiv…
IGT_COMB / NG_COMB	P30101	P30101	-0.78548	0.78548	1.8336e-09	7.85815e-09	96	P30101	PDIA3	Protein disulfide-isomerase A3	PDIA3_HUMAN	17	-41.9841	0.580159	IGT_COMB	NG_COMB	extracellular space,nucleus,endoplasmic reticulum,endoplasmic reticulum lumen,focal adhesion,cell surface,melanosome,myelin sheath,phagocytic vesicle,recycling endosome membrane,extracellular exosome	RNA binding,protein disulfide isomerase activity,cysteine-type endopeptidase activity,phospholipase C activity,protein binding,disulfide oxidoreductase activity,peptide disulfide oxidoreductase activity,identical protein binding	antigen processing and presentation of peptide antigen via MHC class I,antigen processing and presentation of exogenous peptide antigen via MHC class I, TAP-dependent,protein folding,proteolysis,protein import into nucleus,protein retention in ER lumen,signal transduction,protein folding in endoplasmic reticulum,response to endoplasmic reticulum stress,cell redox homeostasis,oxidation-reduction p…
IGT_COMB / NG_COMB	P30626	P30626	-1.39418	1.39418	4.86086e-14	9.14449e-13	96	P30626	SRI	Sorcin	SORCN_HUMAN	4	-61.9538	0.380462	IGT_COMB	NG_COMB	nucleoplasm,cytoplasm,mitochondrion,endoplasmic reticulum membrane,smooth endoplasmic reticulum,cytosol,membrane,sarcoplasmic reticulum,Z disc,T-tubule,sarcoplasmic reticulum membrane,axon terminus,dendritic spine neck,extracellular exosome,chromaffin granule membrane	protease binding,calcium-dependent cysteine-type endopeptidase activity,receptor binding,calcium channel regulator activity,calcium ion binding,protein binding,ion channel binding,protein heterodimerization activity,repressing transcription factor binding	action potential,proteolysis,calcium ion transport,intracellular sequestering of iron ion,regulation of striated muscle contraction,signal transduction,heart development,muscle organ development,regulation of heart contraction,negative regulation of heart rate,regulation of cell communication by electrical coupling,regulation of release of sequestered calcium ion into cytosol by sarcoplasmic reti…
IGT_COMB / NG_COMB	P31150	P31150	-0.813376	0.813376	2.06223e-17	2.48292e-15	96	P31150	GDI1	Rab GDP dissociation inhibitor alpha	GDIA_HUMAN	7	-43.0951	0.569049	IGT_COMB	NG_COMB	cytoplasm,Golgi apparatus,cytosol,axon,midbody,neuronal cell body,myelin sheath	GDP-dissociation inhibitor activity,Rab GDP-dissociation inhibitor activity,GTPase activator activity,protein binding,Rab GTPase binding	signal transduction,protein transport,Rab protein signal transduction,positive regulation of GTPase activity,positive regulation of axon extension,negative regulation of axonogenesis,regulation of small GTPase mediated signal transduction,response to calcium ion,negative regulation of protein targeting to membrane
IGT_COMB / NG_COMB	P35908	P35908	-1.03901	1.03901	0.00666669	0.0069919	96	P35908	KRT2	Keratin, type II cytoskeletal 2 epidermal	K22E_HUMAN	22	-51.3338	0.486662	IGT_COMB	NG_COMB	cornified envelope,extracellular space,nucleus,cytosol,intermediate filament,membrane,keratin filament,extracellular exosome	structural constituent of cytoskeleton,protein binding,cytoskeletal protein binding,structural constituent of epidermis	keratinocyte development,epidermis development,peptide cross-linking,keratinization,keratinocyte activation,keratinocyte proliferation,intermediate filament organization,keratinocyte migration,cornification
IGT_COMB / NG_COMB	P37802	P37802	-0.594958	0.594958	4.57196e-10	2.37269e-09	96	P37802	TAGLN2	Transgelin-2	TAGL2_HUMAN	10	-33.7936	0.662064	IGT_COMB	NG_COMB	extracellular region,cytosol,vesicle,extracellular exosome	protein binding,cadherin binding	platelet degranulation,epithelial cell differentiation
IGT_COMB / NG_COMB	P39060	P39060	-0.889948	0.889948	2.06534e-11	1.44574e-10	96	P39060	COL18A1	Collagen alpha-1(XVIII) chain	COIA1_HUMAN	5	-46.0366	0.539634	IGT_COMB	NG_COMB	extracellular region,collagen trimer,basement membrane,extracellular space,endoplasmic reticulum lumen,extracellular matrix,extracellular exosome	structural molecule activity,metal ion binding	angiogenesis,endothelial cell morphogenesis,cell adhesion,visual perception,positive regulation of cell proliferation,negative regulation of cell proliferation,animal organ morphogenesis,extracellular matrix organization,positive regulation of cell migration,collagen catabolic process,response to drug,response to hydrostatic pressure,positive regulation of endothelial cell apoptotic process
IGT_COMB / NG_COMB	P42330	P42330	-1.30243	1.30243	0.000124996	0.000193936	96	P42330	AKR1C3	Aldo-keto reductase family 1 member C3	AK1C3_HUMAN	9	-59.4558	0.405442	IGT_COMB	NG_COMB	intracellular,nucleus,cytoplasm,cytosol,extracellular exosome	retinal dehydrogenase activity,alditol:NADP+ 1-oxidoreductase activity,aldo-keto reductase (NADP) activity,retinol dehydrogenase activity,oxidoreductase activity, acting on NAD(P)H, quinone or similar compound as acceptor,phenanthrene 9,10-monooxygenase activity,dihydrotestosterone 17-beta-dehydrogenase activity,prostaglandin H2 endoperoxidase reductase activity,prostaglandin D2 11-ketoreductase …	protein import into nucleus, translocation,retinoid metabolic process,prostaglandin metabolic process,G-protein coupled receptor signaling pathway,response to nutrient,steroid metabolic process,positive regulation of cell proliferation,male gonad development,cellular response to starvation,positive regulation of cell death,farnesol catabolic process,cyclooxygenase pathway,keratinocyte differentia…
IGT_COMB / NG_COMB	P43243	P43243	-0.618124	0.618124	1.64143e-11	1.17636e-10	96	P43243	MATR3	Matrin-3	MATR3_HUMAN	8	-34.8482	0.651518	IGT_COMB	NG_COMB	nuclear inner membrane,membrane,nuclear matrix	RNA binding,structural molecule activity,protein binding,zinc ion binding,miRNA binding,identical protein binding	activation of innate immune response,posttranscriptional regulation of gene expression,innate immune response
IGT_COMB / NG_COMB	P45954	P45954	-0.617868	0.617868	3.2005e-09	1.29309e-08	96	P45954	ACADSB	Short/branched chain specific acyl-CoA dehydrogenase, mitochondrial	ACDSB_HUMAN	11	-34.8367	0.651633	IGT_COMB	NG_COMB	mitochondrion,mitochondrial matrix,extracellular exosome	acyl-CoA dehydrogenase activity,flavin adenine dinucleotide binding	fatty acid metabolic process,branched-chain amino acid catabolic process,oxidation-reduction process
IGT_COMB / NG_COMB	P48681	P48681	-1.17291	1.17291	5.14747e-10	2.62608e-09	96	P48681	NES	Nestin	NEST_HUMAN	9	-55.6473	0.443527	IGT_COMB	NG_COMB	cytoplasm,intermediate filament,intermediate filament cytoskeleton	molecular_function,structural molecule activity,intermediate filament binding	G2/M transition of mitotic cell cycle,central nervous system development,brain development,positive regulation of intermediate filament depolymerization,embryonic camera-type eye development,negative regulation of protein binding,negative regulation of catalytic activity,stem cell proliferation,positive regulation of neural precursor cell proliferation
IGT_COMB / NG_COMB	P49257	P49257	-2.75985	2.75985	2.50018e-15	8.85357e-14	96	P49257	LMAN1	Protein ERGIC-53	LMAN1_HUMAN	7	-85.236	0.14764	IGT_COMB	NG_COMB	Golgi membrane,endoplasmic reticulum membrane,endoplasmic reticulum-Golgi intermediate compartment,ER to Golgi transport vesicle membrane,membrane,integral component of membrane,sarcomere,endoplasmic reticulum-Golgi intermediate compartment membrane,host cell perinuclear region of cytoplasm,extracellular exosome,ER to Golgi transport vesicle	protein binding,mannose binding,metal ion binding,unfolded protein binding	protein folding,ER to Golgi vesicle-mediated transport,endoplasmic reticulum organization,Golgi organization,blood coagulation,positive regulation of organelle organization,protein N-linked glycosylation via asparagine,COPII vesicle coating,protein exit from endoplasmic reticulum,early endosome to Golgi transport
IGT_COMB / NG_COMB	P49354	P49354	-1.48835	1.48835	1.57638e-13	2.43328e-12	96	P49354	FNTA	Protein farnesyltransferase/geranylgeranyltransferase type-1 subunit alpha	FNTA_HUMAN	4	-64.3579	0.356421	IGT_COMB	NG_COMB	cytoplasm,cytosol,microtubule associated complex,plasma membrane,CAAX-protein geranylgeranyltransferase complex,protein farnesyltransferase complex	protein farnesyltransferase activity,protein geranylgeranyltransferase activity,Rab geranylgeranyltransferase activity,protein binding,microtubule binding,acetylcholine receptor regulator activity,receptor tyrosine kinase binding,alpha-tubulin binding,CAAX-protein geranylgeranyltransferase activity	transforming growth factor beta receptor signaling pathway,protein farnesylation,protein geranylgeranylation,regulation of rhodopsin mediated signaling pathway,neurotransmitter receptor metabolic process,skeletal muscle acetylcholine-gated channel clustering,positive regulation of tubulin deacetylation,positive regulation of deacetylase activity,execution phase of apoptosis,regulation of neurotra…
IGT_COMB / NG_COMB	P49588	P49588	-0.599161	0.599161	1.19963e-11	8.74145e-11	96	P49588	AARS1	Alanine--tRNA ligase, cytoplasmic	SYAC_HUMAN	8	-33.9862	0.660138	IGT_COMB	NG_COMB	cytoplasm,cytosol,membrane,extracellular exosome,mitochondrion	tRNA binding,aminoacyl-tRNA editing activity,alanine-tRNA ligase activity,ATP binding,amino acid binding,metal ion binding	tRNA modification,tRNA aminoacylation for protein translation,alanyl-tRNA aminoacylation,tRNA processing,cerebellar Purkinje cell layer development,negative regulation of neuron apoptotic process,neuromuscular process controlling balance,Requires Ontology
IGT_COMB / NG_COMB	P49591	P49591	-0.987134	0.987134	7.75075e-14	1.33313e-12	96	P49591	SARS1	Serine--tRNA ligase, cytoplasmic	SYSC_HUMAN	8	-49.5521	0.504479	IGT_COMB	NG_COMB	nucleus,cytoplasm,cytosol,extracellular exosome	core promoter sequence-specific DNA binding,RNA binding,serine-tRNA ligase activity,protein binding,ATP binding,protein homodimerization activity,selenocysteine-tRNA ligase activity	negative regulation of transcription from RNA polymerase II promoter,transcription, DNA-templated,translation,tRNA aminoacylation for protein translation,seryl-tRNA aminoacylation,tRNA processing,selenocysteine metabolic process,negative regulation of angiogenesis,selenocysteinyl-tRNA(Sec) biosynthetic process,negative regulation of vascular endothelial growth factor production
IGT_COMB / NG_COMB	P50238	P50238	-1.17261	1.17261	1.18843e-11	8.74145e-11	96	P50238	CRIP1	Cysteine-rich protein 1	CRIP1_HUMAN	3	-55.6382	0.443618	IGT_COMB	NG_COMB	cytoplasm	AT DNA binding,zinc ion binding,DNA binding, bending,peptide binding	immune response,heart development,cell proliferation,intrinsic apoptotic signaling pathway in response to DNA damage,response to organic substance,response to zinc ion,regulation of gene expression,prostate gland stromal morphogenesis,cellular response to antibiotic,cellular response to UV-B
IGT_COMB / NG_COMB	P51659	P51659	-1.10906	1.10906	7.03663e-13	8.70729e-12	96	P51659	HSD17B4	Peroxisomal multifunctional enzyme type 2	DHB4_HUMAN	6	-53.6403	0.463597	IGT_COMB	NG_COMB	mitochondrion,peroxisome,peroxisomal membrane,peroxisomal matrix,membrane	3-hydroxyacyl-CoA dehydrogenase activity,receptor binding,long-chain-enoyl-CoA hydratase activity,isomerase activity,3alpha,7alpha,12alpha-trihydroxy-5beta-cholest-24-enoyl-CoA hydratase activity,protein homodimerization activity,17-beta-hydroxysteroid dehydrogenase (NAD+) activity	very long-chain fatty acid metabolic process,osteoblast differentiation,fatty acid beta-oxidation,bile acid biosynthetic process,androgen metabolic process,estrogen metabolic process,fatty acid beta-oxidation using acyl-CoA oxidase,alpha-linolenic acid metabolic process,very long-chain fatty-acyl-CoA metabolic process,medium-chain fatty-acyl-CoA metabolic process,Sertoli cell development
IGT_COMB / NG_COMB	P51858	P51858	-0.966665	0.966665	4.11259e-09	1.58704e-08	96	P51858	HDGF	Hepatoma-derived growth factor	HDGF_HUMAN	6	-48.8312	0.511688	IGT_COMB	NG_COMB	extracellular region,extracellular space,nucleoplasm,cytoplasm,transcriptional repressor complex,extracellular matrix	nucleotide binding,RNA polymerase II transcription corepressor activity,transcription corepressor binding,DNA binding,RNA binding,growth factor activity,heparin binding	negative regulation of transcription from RNA polymerase II promoter,transcription, DNA-templated,signal transduction,cell proliferation,regulation of receptor activity,IRE1-mediated unfolded protein response
IGT_COMB / NG_COMB	P51888	P51888	-0.790022	0.790022	0.0330682	0.0278031	96	P51888	PRELP	Prolargin	PRELP_HUMAN	10	-42.1665	0.578335	IGT_COMB	NG_COMB	extracellular region,proteinaceous extracellular matrix,extracellular space,Golgi lumen,extracellular matrix,lysosomal lumen,extracellular exosome,extracellular vesicle	extracellular matrix structural constituent,heparin binding	skeletal system development,cell aging,keratan sulfate biosynthetic process,keratan sulfate catabolic process,axonogenesis
IGT_COMB / NG_COMB	P51991	P51991	-0.732898	0.732898	2.42942e-09	1.01563e-08	96	P51991	HNRNPA3	Heterogeneous nuclear ribonucleoprotein A3	ROA3_HUMAN	5	-39.8306	0.601694	IGT_COMB	NG_COMB	nucleus,nucleoplasm,intracellular ribonucleoprotein complex,catalytic step 2 spliceosome	RNA binding,protein binding	mRNA splicing, via spliceosome,RNA metabolic process
IGT_COMB / NG_COMB	P52209	P52209	-0.739577	0.739577	9.18356e-10	4.3877e-09	96	P52209	PGD	6-phosphogluconate dehydrogenase, decarboxylating	6PGD_HUMAN	10	-40.1085	0.598915	IGT_COMB	NG_COMB	nucleus,cytosol,extracellular exosome	phosphogluconate dehydrogenase (decarboxylating) activity	pentose-phosphate shunt,pentose-phosphate shunt, oxidative branch,pentose biosynthetic process,D-gluconate metabolic process,oxidation-reduction process
IGT_COMB / NG_COMB	P52895	P52895	-0.749104	0.749104	0.00114195	0.00143518	96	P52895	AKR1C2	Aldo-keto reductase family 1 member C2	AK1C2_HUMAN	6	-40.5027	0.594973	IGT_COMB	NG_COMB	cytoplasm,cytosol	alditol:NADP+ 1-oxidoreductase activity,oxidoreductase activity, acting on NAD(P)H, quinone or similar compound as acceptor,phenanthrene 9,10-monooxygenase activity,carboxylic acid binding,bile acid binding,ketosteroid monooxygenase activity,trans-1,2-dihydrobenzene-1,2-diol dehydrogenase activity,androsterone dehydrogenase activity,alcohol dehydrogenase (NADP+) activity,steroid binding,steroid d…	prostaglandin metabolic process,G-protein coupled receptor signaling pathway,digestion,steroid metabolic process,positive regulation of cell proliferation,epithelial cell differentiation,progesterone metabolic process,daunorubicin metabolic process,doxorubicin metabolic process,positive regulation of protein kinase B signaling,oxidation-reduction process,cellular response to jasmonic acid stimulu…
IGT_COMB / NG_COMB	P53778	P53778	-1.52732	1.52732	1.97428e-22	1.18852e-19	96	P53778	MAPK12	Mitogen-activated protein kinase 12	MK12_HUMAN	8	-65.3079	0.346921	IGT_COMB	NG_COMB	nucleus,nucleoplasm,cytoplasm,mitochondrion,cytosol	magnesium ion binding,protein serine/threonine kinase activity,MAP kinase activity,protein binding,ATP binding	MAPK cascade,transcription, DNA-templated,regulation of transcription, DNA-templated,DNA damage induced protein phosphorylation,cell cycle arrest,signal transduction,muscle organ development,regulation of gene expression,positive regulation of peptidase activity,peptidyl-serine phosphorylation,myoblast differentiation,vascular endothelial growth factor receptor signaling pathway,positive regulati…
IGT_COMB / NG_COMB	P55083	P55083	-1.12275	1.12275	1.70759e-06	3.67133e-06	96	P55083	MFAP4	Microfibril-associated glycoprotein 4	MFAP4_HUMAN	2	-54.0784	0.459216	IGT_COMB	NG_COMB	microfibril,extracellular region,proteinaceous extracellular matrix,extracellular matrix,extracellular exosome,elastic fiber	protein binding	cell adhesion,UV protection,regulation of collagen metabolic process,elastic fiber assembly,cellular response to UV-B,fibril organization
IGT_COMB / NG_COMB	P55795	P55795	-0.677769	0.677769	2.95528e-12	2.96329e-11	96	P55795	HNRNPH2	Heterogeneous nuclear ribonucleoprotein H2	HNRH2_HUMAN	6	-37.4869	0.625131	IGT_COMB	NG_COMB	nucleus,nucleoplasm,cytosol,membrane,intracellular ribonucleoprotein complex	RNA binding,protein binding	mRNA splicing, via spliceosome,RNA metabolic process
[truncated: 839 more rows]

## Sheet: Table_S10_GPF_STRING
GPF/STW-H
[truncated: 607 more rows]

[truncated: 1 more sheets: Table_S11_DirectDIA_STRING]
